# Supplementary material
Source: publisher figshare collection journal article supplement (https://acs.figshare.com/ndownloader/files/3938143)
Supplement: Supplementary file 1 [file 3938143]

data_global


_publ_section_synopsis
;
The crystal structure of the solid solution Ca~5~Mg~0.95~Ag~1.05(1)~Ge~5~
corresponds to the previously missing member of the structural series
<i>R</i>~2+~<i>~n~T</i>~2~<i>X</i>~2 +~ <i>~n~</i> with <i>n</i> = 3, and is
described from single-crystal X-ray diffraction data in the orthorhombic space
group <i>Pnma</i>, indicating a <i>klassengleiche</i> symmetry reduction of
index two from the predicted space group <i>Cmcm</i>.
;

_publ_section_keywords
;
Homologous series, Zintl Phase, quaternary Germanide, coloring problem
;

_publ_section_acknowledgements
;
This work was financlially supported by the Swedish National Science Council
(VR). The authors also thank the National Science Foundation (NSF DMR
10--05765 and 12--09135) for generous financial support.
;

_publ_contact_author_name       'Ponou, Sim\'eon'
_publ_contact_author_address
;Centre for Analysis and Synthesis, Chemistry Department, 
Lund University
BOX 124, SE 22100 Lund (Sweden)
;
_publ_contact_author_email     sponou@gmail.com
_publ_contact_author_fax       '+46-(0) 46 222 4012'
_publ_contact_author_phone     '+46-(0) 46 222 4769'

_publ_requested_journal        
;Inorganic Chemistry 
Article
;

# TITLE AND AUTHOR LIST

_publ_section_title
;
Valence State Driven Site Preference in the Quaternary Compound Ca~5~MgAgGe~5~:
An Electron-Deficient Phase with Optimized Bonding
; 

loop_
       _publ_author_name
       _publ_author_address

'Sim\'eon Ponou'
;Centre for Analysis and Synthesis, Chemistry Department,
Lund University
BOX 124, SE 22100 Lund, Sweden
;
 
'Sven Lidin'
;Centre for Analysis and Synthesis, Chemistry Department,
Lund University
BOX 124, SE 22100 Lund, Sweden
;

'Yuemei Zhang'
;Department of Chemistry and Ames Laboratory, Iowa State University, 
1605 Gilman Hall, Ames, 50011 Iowa, United States
;

'Gordon J. Miller'
;Department of Chemistry and Ames Laboratory, Iowa State University, 
1605 Gilman Hall, Ames, 50011 Iowa, United States
;

#------------------  SECTION 2. COMPOUND(S) DETAILS -------------------------# 
data_shelx
 
_audit_creation_method            SHELXL-2013
_chemical_name_systematic
?
_chemical_name_common             ?
_chemical_melting_point           ?
_chemical_formula_moiety          ?
_chemical_formula_sum
 'Ag1.05 Ca5 Ge5 Mg0.95' 
_chemical_formula_weight          699.71

loop_
 _atom_type_symbol
 _atom_type_description
 _atom_type_scat_dispersion_real
 _atom_type_scat_dispersion_imag
 _atom_type_scat_source
 'Ca'  'Ca'   0.2262   0.3064
 'International Tables Vol C Tables 4.2.6.8 and 6.1.1.4'
 'Ge'  'Ge'   0.1547   1.8001
 'International Tables Vol C Tables 4.2.6.8 and 6.1.1.4'
 'Ag'  'Ag'  -0.8971   1.1015
 'International Tables Vol C Tables 4.2.6.8 and 6.1.1.4'
 'Mg'  'Mg'   0.0486   0.0363
 'International Tables Vol C Tables 4.2.6.8 and 6.1.1.4'
 
_space_group_crystal_system       orthorhombic
_space_group_IT_number            62
_space_group_name_H-M_alt         'P n m a'
_space_group_name_Hall            '-P 2ac 2n'
 
_shelx_space_group_comment
;
The symmetry employed for this shelxl refinement is uniquely defined
by the following loop, which should always be used as a source of
symmetry information in preference to the above space-group names.
They are only intended as comments.
;
 
loop_
 _space_group_symop_operation_xyz
 'x, y, z'
 '-x+1/2, -y, z+1/2'
 '-x, y+1/2, -z'
 'x+1/2, -y+1/2, -z+1/2'
 '-x, -y, -z'
 'x-1/2, y, -z-1/2'
 'x, -y-1/2, z'
 '-x-1/2, y-1/2, z-1/2'
 
_cell_length_a                    23.1481(4)
_cell_length_b                    4.47360(10)
_cell_length_c                    11.0128(2)
_cell_angle_alpha                 90
_cell_angle_beta                  90
_cell_angle_gamma                 90
_cell_volume                      1140.43(4)
_cell_formula_units_Z             4
_cell_measurement_temperature     293(2)
_cell_measurement_reflns_used     ? 
_cell_measurement_theta_min       ? 
_cell_measurement_theta_max       ? 
 
_exptl_crystal_description        ? 
_exptl_crystal_colour             ? 
_exptl_crystal_density_meas       ? 
_exptl_crystal_density_method     ?              
_exptl_crystal_density_diffrn     4.075          
_exptl_crystal_F_000              1283
_exptl_transmission_factor_min    ?                                             
_exptl_transmission_factor_max    ?                                             
_exptl_crystal_size_max           ? 
_exptl_crystal_size_mid           ? 
_exptl_crystal_size_min           ? 
_exptl_absorpt_coefficient_mu     17.013
_shelx_estimated_absorpt_T_min    ? 
_shelx_estimated_absorpt_T_max    ? 
_exptl_absorpt_correction_type    ? 
_exptl_absorpt_correction_T_min   ? 
_exptl_absorpt_correction_T_max   ? 
_exptl_absorpt_process_details    ? 
 
_exptl_special_details
?
 
_diffrn_ambient_temperature       293(2)
_diffrn_radiation_wavelength      0.71073
_diffrn_radiation_type            MoK\a
_diffrn_source                    ?                       
_diffrn_measurement_device_type   ? 
_diffrn_measurement_method        ? 
_diffrn_detector_area_resol_mean  ? 
_diffrn_reflns_number             10577
_diffrn_reflns_av_unetI/netI      0.0448
_diffrn_reflns_av_R_equivalents   0.0448
_diffrn_reflns_limit_h_min        -33
_diffrn_reflns_limit_h_max        32
_diffrn_reflns_limit_k_min        -6
_diffrn_reflns_limit_k_max        6
_diffrn_reflns_limit_l_min        -9
_diffrn_reflns_limit_l_max        16
_diffrn_reflns_theta_min          3.700
_diffrn_reflns_theta_max          32.229
_diffrn_reflns_theta_full         25.242
_diffrn_measured_fraction_theta_max   0.953
_diffrn_measured_fraction_theta_full  0.996
_diffrn_reflns_Laue_measured_fraction_max    0.953
_diffrn_reflns_Laue_measured_fraction_full   0.996
_diffrn_reflns_point_group_measured_fraction_max   0.953
_diffrn_reflns_point_group_measured_fraction_full  0.996
_reflns_number_total              2138
_reflns_number_gt                 1594
_reflns_threshold_expression      'I > 2\s(I)'
_reflns_Friedel_coverage          0.000
_reflns_Friedel_fraction_max      .
_reflns_Friedel_fraction_full     .
 
_reflns_special_details
;
 Reflections were merged by SHELXL according to the crystal
 class for the calculation of statistics and refinement.
 
 _reflns_Friedel_fraction is defined as the number of unique
 Friedel pairs measured divided by the number that would be
 possible theoretically, ignoring centric projections and
 systematic absences.
;
 
_computing_data_collection        ?
_computing_cell_refinement        ?
_computing_data_reduction         ?
_computing_structure_solution     ?
_computing_structure_refinement   'SHELXL-2013 (Sheldrick, 2013)'
_computing_molecular_graphics     ?
_computing_publication_material   ?
 
_refine_special_details
?
_refine_ls_structure_factor_coef  Fsqd
_refine_ls_matrix_type            full
_refine_ls_weighting_scheme       calc
_refine_ls_weighting_details
'w=1/[\s^2^(Fo^2^)+(0.0282P)^2^+1.4157P] where P=(Fo^2^+2Fc^2^)/3'
_atom_sites_solution_primary      ?
_atom_sites_solution_secondary    ?
_atom_sites_solution_hydrogens    .
_refine_ls_hydrogen_treatment     undef
_refine_ls_extinction_method      SHELXL
_refine_ls_extinction_coef        0.00256(15)
_refine_ls_extinction_expression
 'Fc^*^=kFc[1+0.001xFc^2^\l^3^/sin(2\q)]^-1/4^'
_refine_ls_number_reflns          2138
_refine_ls_number_parameters      77
_refine_ls_number_restraints      0
_refine_ls_R_factor_all           0.0586
_refine_ls_R_factor_gt            0.0368
_refine_ls_wR_factor_ref          0.0734
_refine_ls_wR_factor_gt           0.0701
_refine_ls_goodness_of_fit_ref    1.091
_refine_ls_restrained_S_all       1.091
_refine_ls_shift/su_max           0.001
_refine_ls_shift/su_mean          0.000
 
loop_
 _atom_site_label
 _atom_site_type_symbol
 _atom_site_fract_x
 _atom_site_fract_y
 _atom_site_fract_z
 _atom_site_U_iso_or_equiv
 _atom_site_adp_type
 _atom_site_occupancy
 _atom_site_site_symmetry_order  
 _atom_site_calc_flag
 _atom_site_refinement_flags_posn
 _atom_site_refinement_flags_adp
 _atom_site_refinement_flags_occupancy
 _atom_site_disorder_assembly
 _atom_site_disorder_group
Mg1 Mg 0.02027(3) 0.2500 0.10258(6) 0.0144(2) Uani 0.218(3) 2 d S T P . .
Ag1 Ag 0.02027(3) 0.2500 0.10258(6) 0.0144(2) Uani 0.782(3) 2 d S T P . .
Ge2 Ge 0.97356(3) 0.2500 0.33238(6) 0.00951(17) Uani 1 2 d S T P . .
Ge3 Ge 0.65717(3) 0.2500 0.09094(6) 0.00946(16) Uani 1 2 d S T P . .
Ge4 Ge 0.74713(3) 0.2500 0.95247(7) 0.00950(16) Uani 1 2 d S T P . .
Ge5 Ge 0.83319(3) 0.2500 0.09974(6) 0.00984(16) Uani 1 2 d S T P . .
Ge1 Ge 0.91944(3) 0.2500 0.95469(6) 0.0101(2) Uani 1 2 d S T P . .
Ag2 Ag 0.55167(6) 0.2500 0.96677(11) 0.0142(4) Uani 0.268(3) 2 d S T P . .
Mg2 Mg 0.55167(6) 0.2500 0.96677(11) 0.0142(4) Uani 0.732(3) 2 d S T P . .
Ca1 Ca 0.07417(6) 0.2500 0.83725(13) 0.0135(3) Uani 1 2 d S T P . .
Ca2 Ca 0.92775(6) 0.2500 0.68134(13) 0.0130(3) Uani 1 2 d S T P . .
Ca3 Ca 0.16470(6) 0.2500 0.11543(12) 0.0105(3) Uani 1 2 d S T P . .
Ca4 Ca 0.34180(6) 0.2500 0.11268(12) 0.0113(3) Uani 1 2 d S T P . .
Ca5 Ca 0.25477(6) 0.2500 0.83796(13) 0.0113(3) Uani 1 2 d S T P . .
 
loop_
 _atom_site_aniso_label
 _atom_site_aniso_U_11
 _atom_site_aniso_U_22
 _atom_site_aniso_U_33
 _atom_site_aniso_U_23
 _atom_site_aniso_U_13
 _atom_site_aniso_U_12
Mg1 0.0111(3) 0.0123(3) 0.0198(4) 0.000 0.0048(2) 0.000
Ag1 0.0111(3) 0.0123(3) 0.0198(4) 0.000 0.0048(2) 0.000
Ge2 0.0092(3) 0.0076(3) 0.0118(3) 0.000 0.0000(3) 0.000
Ge3 0.0065(3) 0.0099(3) 0.0120(3) 0.000 0.0008(3) 0.000
Ge4 0.0067(3) 0.0108(3) 0.0111(3) 0.000 0.0004(2) 0.000
Ge5 0.0076(3) 0.0106(3) 0.0113(3) 0.000 0.0001(3) 0.000
Ge1 0.0095(4) 0.0079(4) 0.0128(4) 0.000 0.0015(3) 0.000
Ag2 0.0155(7) 0.0129(7) 0.0141(6) 0.000 -0.0038(5) 0.000
Mg2 0.0155(7) 0.0129(7) 0.0141(6) 0.000 -0.0038(5) 0.000
Ca1 0.0155(7) 0.0112(6) 0.0137(6) 0.000 -0.0037(6) 0.000
Ca2 0.0101(6) 0.0152(7) 0.0136(6) 0.000 -0.0011(5) 0.000
Ca3 0.0093(6) 0.0099(6) 0.0123(6) 0.000 -0.0014(5) 0.000
Ca4 0.0092(6) 0.0127(7) 0.0119(6) 0.000 -0.0013(5) 0.000
Ca5 0.0108(6) 0.0107(6) 0.0124(6) 0.000 -0.0005(5) 0.000
 
_geom_special_details
;
 All esds (except the esd in the dihedral angle between two l.s. planes)
 are estimated using the full covariance matrix.  The cell esds are taken
 into account individually in the estimation of esds in distances, angles
 and torsion angles; correlations between esds in cell parameters are only
 used when they are defined by crystal symmetry.  An approximate (isotropic)
 treatment of cell esds is used for estimating esds involving l.s. planes.
;
 
loop_
 _geom_bond_atom_site_label_1
 _geom_bond_atom_site_label_2
 _geom_bond_distance
 _geom_bond_site_symmetry_2
 _geom_bond_publ_flag
Mg1 Ge1 2.7108(5) 5_666 ?
Mg1 Ge1 2.7108(5) 5_656 ?
Mg1 Ge2 2.7521(9) 1_455 ?
Mg1 Ge1 2.8460(10) 1_454 ?
Mg1 Ca1 3.1772(16) 1_554 ?
Mg1 Ca1 3.1970(11) 5_556 ?
Mg1 Ca1 3.1970(11) 5_566 ?
Mg1 Ag1 3.3149(10) 5 ?
Mg1 Mg1 3.3149(10) 5 ?
Mg1 Mg1 3.3149(10) 5_565 ?
Mg1 Ag1 3.3149(10) 5_565 ?
Mg1 Ca3 3.3462(15) . ?
Ge2 Mg2 2.7449(8) 2_664 ?
Ge2 Ag2 2.7449(8) 2_664 ?
Ge2 Mg2 2.7449(8) 2_654 ?
Ge2 Ag2 2.7449(8) 2_654 ?
Ge2 Mg1 2.7521(9) 1_655 ?
Ge2 Ag1 2.7521(9) 1_655 ?
Ge2 Mg2 2.8568(14) 6_657 ?
Ge2 Ag2 2.8568(14) 6_657 ?
Ge2 Ca4 3.1096(15) 6_656 ?
Ge2 Ca1 3.1167(11) 5_656 ?
Ge2 Ca1 3.1167(11) 5_666 ?
Ge2 Ca2 3.2008(11) 5_766 ?
Ge3 Ge4 2.5811(10) 1_554 ?
Ge3 Mg2 2.7990(14) 1_554 ?
Ge3 Ag2 2.7990(14) 1_554 ?
Ge3 Ca5 3.1259(10) 5_666 ?
Ge3 Ca5 3.1259(10) 5_656 ?
Ge3 Ca2 3.1398(11) 2_654 ?
Ge3 Ca2 3.1398(11) 2_664 ?
Ge3 Ca4 3.1674(10) 5_655 ?
Ge3 Ca4 3.1674(10) 5_665 ?
Ge3 Ca3 3.2384(14) 6_656 ?
Ge4 Ge5 2.5687(9) 1_556 ?
Ge4 Ge3 2.5811(10) 1_556 ?
Ge4 Ca3 3.1189(10) 5_666 ?
Ge4 Ca3 3.1189(10) 5_656 ?
Ge4 Ca4 3.1234(10) 5_656 ?
Ge4 Ca4 3.1234(10) 5_666 ?
Ge4 Ca5 3.2033(17) 6_657 ?
Ge4 Ca5 3.2144(12) 5_667 ?
Ge4 Ca5 3.2144(12) 5_657 ?
Ge5 Ge1 2.5569(10) 1_554 ?
Ge5 Ge4 2.5688(9) 1_554 ?
Ge5 Ca5 3.1015(10) 5_656 ?
Ge5 Ca5 3.1015(10) 5_666 ?
Ge5 Ca4 3.1734(15) 6_656 ?
Ge5 Ca1 3.1755(11) 5_666 ?
Ge5 Ca1 3.1755(11) 5_656 ?
Ge5 Ca3 3.2589(10) 5_655 ?
Ge5 Ca3 3.2589(10) 5_665 ?
Ge1 Ge5 2.5569(10) 1_556 ?
Ge1 Ag1 2.7108(5) 5_666 ?
Ge1 Mg1 2.7108(5) 5_666 ?
Ge1 Ag1 2.7108(5) 5_656 ?
Ge1 Mg1 2.7108(5) 5_656 ?
Ge1 Mg1 2.8460(10) 1_656 ?
Ge1 Ag1 2.8460(10) 1_656 ?
Ge1 Ca2 3.0165(16) . ?
Ge1 Ca3 3.0648(10) 5_656 ?
Ge1 Ca3 3.0648(10) 5_666 ?
Ge1 Ca1 3.2055(11) 5_667 ?
Ge1 Ca1 3.2055(11) 5_657 ?
Ag2 Ge2 2.7449(8) 2_655 ?
Ag2 Ge2 2.7449(8) 2_665 ?
Ag2 Ge3 2.7990(14) 1_556 ?
Ag2 Ge2 2.8568(14) 6_557 ?
Ag2 Ca2 3.2885(13) 2_665 ?
Ag2 Ca2 3.2885(13) 2_655 ?
Ag2 Ca2 3.2999(19) 6_557 ?
Ag2 Mg2 3.3558(19) 5_657 ?
Ag2 Ag2 3.3558(19) 5_657 ?
Ag2 Mg2 3.3558(19) 5_667 ?
Ag2 Ag2 3.3558(19) 5_667 ?
Ag2 Ca1 3.3883(18) 6_657 ?
Ca1 Ge2 3.1167(11) 5_656 ?
Ca1 Ge2 3.1167(11) 5_666 ?
Ca1 Ge5 3.1755(11) 5_666 ?
Ca1 Ge5 3.1755(11) 5_656 ?
Ca1 Mg1 3.1772(16) 1_556 ?
Ca1 Ag1 3.1772(16) 1_556 ?
Ca1 Mg1 3.1971(11) 5_556 ?
Ca1 Ag1 3.1971(11) 5_556 ?
Ca1 Ag1 3.1971(11) 5_566 ?
Ca1 Mg1 3.1971(11) 5_566 ?
Ca1 Ge1 3.2055(11) 5_667 ?
Ca1 Ge1 3.2055(11) 5_657 ?
Ca2 Ge3 3.1398(11) 2_655 ?
Ca2 Ge3 3.1398(11) 2_665 ?
Ca2 Ge2 3.2008(11) 5_766 ?
Ca2 Ge2 3.2008(11) 5_756 ?
Ca2 Mg2 3.2885(13) 2_654 ?
Ca2 Ag2 3.2885(13) 2_654 ?
Ca2 Mg2 3.2885(13) 2_664 ?
Ca2 Ag2 3.2885(13) 2_664 ?
Ca2 Mg2 3.2999(19) 6_657 ?
Ca2 Ag2 3.2999(19) 6_657 ?
Ca2 Ag1 3.4805(12) 5_666 ?
Ca3 Ge1 3.0648(10) 5_656 ?
Ca3 Ge1 3.0648(10) 5_666 ?
Ca3 Ge4 3.1189(10) 5_666 ?
Ca3 Ge4 3.1189(10) 5_656 ?
Ca3 Ge3 3.2384(14) 6_556 ?
Ca3 Ge5 3.2589(10) 5_655 ?
Ca3 Ge5 3.2589(10) 5_665 ?
Ca3 Ca5 3.6992(19) 1_554 ?
Ca3 Ca1 3.7117(19) 1_554 ?
Ca3 Ca5 3.8059(15) 2_564 ?
Ca4 Ge2 3.1096(15) 6_556 ?
Ca4 Ge4 3.1235(10) 5_656 ?
Ca4 Ge4 3.1234(10) 5_666 ?
Ca4 Ge3 3.1673(10) 5_655 ?
Ca4 Ge3 3.1673(10) 5_665 ?
Ca4 Ge5 3.1734(15) 6_556 ?
Ca4 Mg2 3.4424(14) 5_666 ?
Ca4 Ag2 3.4424(14) 5_666 ?
Ca4 Mg2 3.4424(14) 5_656 ?
Ca4 Ag2 3.4424(14) 5_656 ?
Ca4 Ca5 3.6348(19) 1_554 ?
Ca4 Ca2 3.8003(19) 6_556 ?
Ca5 Ge5 3.1016(10) 5_656 ?
Ca5 Ge5 3.1016(10) 5_666 ?
Ca5 Ge3 3.1259(10) 5_666 ?
Ca5 Ge3 3.1259(10) 5_656 ?
Ca5 Ge4 3.2033(17) 6_557 ?
Ca5 Ge4 3.2143(12) 5_667 ?
Ca5 Ge4 3.2143(12) 5_657 ?
Ca5 Ca4 3.6347(19) 1_556 ?
Ca5 Ca3 3.6993(19) 1_556 ?
Ca5 Ca3 3.8058(15) 2 ?
Ca5 Ca3 3.8058(15) 2_565 ?
Ca5 Ca2 4.010(2) 6_557 ?
 
loop_
 _geom_angle_atom_site_label_1
 _geom_angle_atom_site_label_2
 _geom_angle_atom_site_label_3
 _geom_angle
 _geom_angle_site_symmetry_1
 _geom_angle_site_symmetry_3
 _geom_angle_publ_flag
Ge1 Mg1 Ge1 111.20(3) 5_666 5_656 ?
Ge1 Mg1 Ge2 114.59(2) 5_666 1_455 ?
Ge1 Mg1 Ge2 114.59(2) 5_656 1_455 ?
Ge1 Mg1 Ge1 106.80(2) 5_666 1_454 ?
Ge1 Mg1 Ge1 106.80(2) 5_656 1_454 ?
Ge2 Mg1 Ge1 101.77(3) 1_455 1_454 ?
Ge1 Mg1 Ca1 65.41(2) 5_666 1_554 ?
Ge1 Mg1 Ca1 65.41(2) 5_656 1_554 ?
Ge2 Mg1 Ca1 179.99(4) 1_455 1_554 ?
Ge1 Mg1 Ca1 78.21(3) 1_454 1_554 ?
Ge1 Mg1 Ca1 167.83(3) 5_666 5_556 ?
Ge1 Mg1 Ca1 79.80(2) 5_656 5_556 ?
Ge2 Mg1 Ca1 62.66(3) 1_455 5_556 ?
Ge1 Mg1 Ca1 63.76(3) 1_454 5_556 ?
Ca1 Mg1 Ca1 117.33(3) 1_554 5_556 ?
Ge1 Mg1 Ca1 79.80(2) 5_666 5_566 ?
Ge1 Mg1 Ca1 167.83(3) 5_656 5_566 ?
Ge2 Mg1 Ca1 62.66(3) 1_455 5_566 ?
Ge1 Mg1 Ca1 63.76(3) 1_454 5_566 ?
Ca1 Mg1 Ca1 117.33(3) 1_554 5_566 ?
Ca1 Mg1 Ca1 88.80(4) 5_556 5_566 ?
Ge1 Mg1 Ag1 122.95(3) 5_666 5 ?
Ge1 Mg1 Ag1 55.277(17) 5_656 5 ?
Ge2 Mg1 Ag1 121.03(3) 1_455 5 ?
Ge1 Mg1 Ag1 51.524(19) 1_454 5 ?
Ca1 Mg1 Ag1 58.96(2) 1_554 5 ?
Ca1 Mg1 Ag1 58.37(3) 5_556 5 ?
Ca1 Mg1 Ag1 114.82(4) 5_566 5 ?
Ge1 Mg1 Mg1 122.95(3) 5_666 5 ?
Ge1 Mg1 Mg1 55.277(17) 5_656 5 ?
Ge2 Mg1 Mg1 121.03(3) 1_455 5 ?
Ge1 Mg1 Mg1 51.524(19) 1_454 5 ?
Ca1 Mg1 Mg1 58.96(2) 1_554 5 ?
Ca1 Mg1 Mg1 58.37(3) 5_556 5 ?
Ca1 Mg1 Mg1 114.82(4) 5_566 5 ?
Ag1 Mg1 Mg1 0.00(3) 5 5 ?
Ge1 Mg1 Mg1 55.277(17) 5_666 5_565 ?
Ge1 Mg1 Mg1 122.95(3) 5_656 5_565 ?
Ge2 Mg1 Mg1 121.03(3) 1_455 5_565 ?
Ge1 Mg1 Mg1 51.524(19) 1_454 5_565 ?
Ca1 Mg1 Mg1 58.96(2) 1_554 5_565 ?
Ca1 Mg1 Mg1 114.82(4) 5_556 5_565 ?
Ca1 Mg1 Mg1 58.37(3) 5_566 5_565 ?
Ag1 Mg1 Mg1 84.87(3) 5 5_565 ?
Mg1 Mg1 Mg1 84.87(3) 5 5_565 ?
Ge1 Mg1 Ag1 55.277(17) 5_666 5_565 ?
Ge1 Mg1 Ag1 122.95(3) 5_656 5_565 ?
Ge2 Mg1 Ag1 121.03(3) 1_455 5_565 ?
Ge1 Mg1 Ag1 51.524(19) 1_454 5_565 ?
Ca1 Mg1 Ag1 58.96(2) 1_554 5_565 ?
Ca1 Mg1 Ag1 114.82(4) 5_556 5_565 ?
Ca1 Mg1 Ag1 58.37(3) 5_566 5_565 ?
Ag1 Mg1 Ag1 84.87(3) 5 5_565 ?
Mg1 Mg1 Ag1 84.87(3) 5 5_565 ?
Mg1 Mg1 Ag1 0.00(3) 5_565 5_565 ?
Ge1 Mg1 Ca3 59.702(19) 5_666 . ?
Ge1 Mg1 Ca3 59.702(19) 5_656 . ?
Ge2 Mg1 Ca3 110.71(3) 1_455 . ?
Ge1 Mg1 Ca3 147.52(3) 1_454 . ?
Ca1 Mg1 Ca3 69.30(4) 1_554 . ?
Ca1 Mg1 Ca3 132.41(2) 5_556 . ?
Ca1 Mg1 Ca3 132.41(2) 5_566 . ?
Ag1 Mg1 Ca3 108.16(3) 5 . ?
Mg1 Mg1 Ca3 108.16(3) 5 . ?
Mg1 Mg1 Ca3 108.16(3) 5_565 . ?
Ag1 Mg1 Ca3 108.16(3) 5_565 . ?
Mg2 Ge2 Ag2 0.00(7) 2_664 2_664 ?
Mg2 Ge2 Mg2 109.15(5) 2_664 2_654 ?
Ag2 Ge2 Mg2 109.15(5) 2_664 2_654 ?
Mg2 Ge2 Ag2 109.15(5) 2_664 2_654 ?
Ag2 Ge2 Ag2 109.15(5) 2_664 2_654 ?
Mg2 Ge2 Ag2 0.00(5) 2_654 2_654 ?
Mg2 Ge2 Mg1 125.41(2) 2_664 1_655 ?
Ag2 Ge2 Mg1 125.41(2) 2_664 1_655 ?
Mg2 Ge2 Mg1 125.41(2) 2_654 1_655 ?
Ag2 Ge2 Mg1 125.41(2) 2_654 1_655 ?
Mg2 Ge2 Ag1 125.41(2) 2_664 1_655 ?
Ag2 Ge2 Ag1 125.41(2) 2_664 1_655 ?
Mg2 Ge2 Ag1 125.41(2) 2_654 1_655 ?
Ag2 Ge2 Ag1 125.41(2) 2_654 1_655 ?
Mg1 Ge2 Ag1 0.00(3) 1_655 1_655 ?
Mg2 Ge2 Mg2 73.57(4) 2_664 6_657 ?
Ag2 Ge2 Mg2 73.57(4) 2_664 6_657 ?
Mg2 Ge2 Mg2 73.57(4) 2_654 6_657 ?
Ag2 Ge2 Mg2 73.57(4) 2_654 6_657 ?
Mg1 Ge2 Mg2 117.60(4) 1_655 6_657 ?
Ag1 Ge2 Mg2 117.60(4) 1_655 6_657 ?
Mg2 Ge2 Ag2 73.57(4) 2_664 6_657 ?
Ag2 Ge2 Ag2 73.57(4) 2_664 6_657 ?
Mg2 Ge2 Ag2 73.57(4) 2_654 6_657 ?
Ag2 Ge2 Ag2 73.57(4) 2_654 6_657 ?
Mg1 Ge2 Ag2 117.60(4) 1_655 6_657 ?
Ag1 Ge2 Ag2 117.60(4) 1_655 6_657 ?
Mg2 Ge2 Ag2 0.00(5) 6_657 6_657 ?
Mg2 Ge2 Ca4 71.72(3) 2_664 6_656 ?
Ag2 Ge2 Ca4 71.72(3) 2_664 6_656 ?
Mg2 Ge2 Ca4 71.72(3) 2_654 6_656 ?
Ag2 Ge2 Ca4 71.72(3) 2_654 6_656 ?
Mg1 Ge2 Ca4 124.35(4) 1_655 6_656 ?
Ag1 Ge2 Ca4 124.35(4) 1_655 6_656 ?
Mg2 Ge2 Ca4 118.04(4) 6_657 6_656 ?
Ag2 Ge2 Ca4 118.04(4) 6_657 6_656 ?
Mg2 Ge2 Ca1 146.36(4) 2_664 5_656 ?
Ag2 Ge2 Ca1 146.36(4) 2_664 5_656 ?
Mg2 Ge2 Ca1 70.30(3) 2_654 5_656 ?
Ag2 Ge2 Ca1 70.30(3) 2_654 5_656 ?
Mg1 Ge2 Ca1 65.67(3) 1_655 5_656 ?
Ag1 Ge2 Ca1 65.67(3) 1_655 5_656 ?
Mg2 Ge2 Ca1 133.51(2) 6_657 5_656 ?
Ag2 Ge2 Ca1 133.51(2) 6_657 5_656 ?
Ca4 Ge2 Ca1 76.64(3) 6_656 5_656 ?
Mg2 Ge2 Ca1 70.30(3) 2_664 5_666 ?
Ag2 Ge2 Ca1 70.30(3) 2_664 5_666 ?
Mg2 Ge2 Ca1 146.36(4) 2_654 5_666 ?
Ag2 Ge2 Ca1 146.36(4) 2_654 5_666 ?
Mg1 Ge2 Ca1 65.67(3) 1_655 5_666 ?
Ag1 Ge2 Ca1 65.67(3) 1_655 5_666 ?
Mg2 Ge2 Ca1 133.51(2) 6_657 5_666 ?
Ag2 Ge2 Ca1 133.51(2) 6_657 5_666 ?
Ca4 Ge2 Ca1 76.64(3) 6_656 5_666 ?
Ca1 Ge2 Ca1 91.73(4) 5_656 5_666 ?
Mg2 Ge2 Ca2 66.91(3) 2_664 5_766 ?
Ag2 Ge2 Ca2 66.91(3) 2_664 5_766 ?
Mg2 Ge2 Ca2 138.31(4) 2_654 5_766 ?
Ag2 Ge2 Ca2 138.31(4) 2_654 5_766 ?
Mg1 Ge2 Ca2 71.11(3) 1_655 5_766 ?
Ag1 Ge2 Ca2 71.11(3) 1_655 5_766 ?
Mg2 Ge2 Ca2 65.47(3) 6_657 5_766 ?
Ag2 Ge2 Ca2 65.47(3) 6_657 5_766 ?
Ca4 Ge2 Ca2 135.18(2) 6_656 5_766 ?
Ca1 Ge2 Ca2 136.57(4) 5_656 5_766 ?
Ca1 Ge2 Ca2 73.93(3) 5_666 5_766 ?
Ge4 Ge3 Mg2 114.54(4) 1_554 1_554 ?
Ge4 Ge3 Ag2 114.54(4) 1_554 1_554 ?
Mg2 Ge3 Ag2 0.00(5) 1_554 1_554 ?
Ge4 Ge3 Ca5 67.78(3) 1_554 5_666 ?
Mg2 Ge3 Ca5 133.74(2) 1_554 5_666 ?
Ag2 Ge3 Ca5 133.74(2) 1_554 5_666 ?
Ge4 Ge3 Ca5 67.78(3) 1_554 5_656 ?
Mg2 Ge3 Ca5 133.74(2) 1_554 5_656 ?
Ag2 Ge3 Ca5 133.74(2) 1_554 5_656 ?
Ca5 Ge3 Ca5 91.38(4) 5_666 5_656 ?
Ge4 Ge3 Ca2 133.82(2) 1_554 2_654 ?
Mg2 Ge3 Ca2 66.96(3) 1_554 2_654 ?
Ag2 Ge3 Ca2 66.96(3) 1_554 2_654 ?
Ca5 Ge3 Ca2 146.99(4) 5_666 2_654 ?
Ca5 Ge3 Ca2 79.58(3) 5_656 2_654 ?
Ge4 Ge3 Ca2 133.82(2) 1_554 2_664 ?
Mg2 Ge3 Ca2 66.96(3) 1_554 2_664 ?
Ag2 Ge3 Ca2 66.96(3) 1_554 2_664 ?
Ca5 Ge3 Ca2 79.58(3) 5_666 2_664 ?
Ca5 Ge3 Ca2 146.99(4) 5_656 2_664 ?
Ca2 Ge3 Ca2 90.86(4) 2_654 2_664 ?
Ge4 Ge3 Ca4 64.89(3) 1_554 5_655 ?
Mg2 Ge3 Ca4 70.17(3) 1_554 5_655 ?
Ag2 Ge3 Ca4 70.17(3) 1_554 5_655 ?
Ca5 Ge3 Ca4 132.67(4) 5_666 5_655 ?
Ca5 Ge3 Ca4 70.55(3) 5_656 5_655 ?
Ca2 Ge3 Ca4 74.10(3) 2_654 5_655 ?
Ca2 Ge3 Ca4 137.08(4) 2_664 5_655 ?
Ge4 Ge3 Ca4 64.89(3) 1_554 5_665 ?
Mg2 Ge3 Ca4 70.17(3) 1_554 5_665 ?
Ag2 Ge3 Ca4 70.17(3) 1_554 5_665 ?
Ca5 Ge3 Ca4 70.55(3) 5_666 5_665 ?
Ca5 Ge3 Ca4 132.67(4) 5_656 5_665 ?
Ca2 Ge3 Ca4 137.08(4) 2_654 5_665 ?
Ca2 Ge3 Ca4 74.10(3) 2_664 5_665 ?
Ca4 Ge3 Ca4 89.85(4) 5_655 5_665 ?
Ge4 Ge3 Ca3 123.13(4) 1_554 6_656 ?
Mg2 Ge3 Ca3 122.33(4) 1_554 6_656 ?
Ag2 Ge3 Ca3 122.33(4) 1_554 6_656 ?
Ca5 Ge3 Ca3 73.43(3) 5_666 6_656 ?
Ca5 Ge3 Ca3 73.43(3) 5_656 6_656 ?
Ca2 Ge3 Ca3 73.56(3) 2_654 6_656 ?
Ca2 Ge3 Ca3 73.56(3) 2_664 6_656 ?
Ca4 Ge3 Ca3 134.954(19) 5_655 6_656 ?
Ca4 Ge3 Ca3 134.954(19) 5_665 6_656 ?
Ge5 Ge4 Ge3 104.63(3) 1_556 1_556 ?
Ge5 Ge4 Ca3 69.14(3) 1_556 5_666 ?
Ge3 Ge4 Ca3 132.03(2) 1_556 5_666 ?
Ge5 Ge4 Ca3 69.14(3) 1_556 5_656 ?
Ge3 Ge4 Ca3 132.03(2) 1_556 5_656 ?
Ca3 Ge4 Ca3 91.64(4) 5_666 5_656 ?
Ge5 Ge4 Ca4 131.00(2) 1_556 5_656 ?
Ge3 Ge4 Ca4 66.67(3) 1_556 5_656 ?
Ca3 Ge4 Ca4 152.85(4) 5_666 5_656 ?
Ca3 Ge4 Ca4 82.10(3) 5_656 5_656 ?
Ge5 Ge4 Ca4 131.00(2) 1_556 5_666 ?
Ge3 Ge4 Ca4 66.67(3) 1_556 5_666 ?
Ca3 Ge4 Ca4 82.10(3) 5_666 5_666 ?
Ca3 Ge4 Ca4 152.85(4) 5_656 5_666 ?
Ca4 Ge4 Ca4 91.47(4) 5_656 5_666 ?
Ge5 Ge4 Ca5 125.99(4) 1_556 6_657 ?
Ge3 Ge4 Ca5 129.38(4) 1_556 6_657 ?
Ca3 Ge4 Ca5 74.01(3) 5_666 6_657 ?
Ca3 Ge4 Ca5 74.01(3) 5_656 6_657 ?
Ca4 Ge4 Ca5 78.87(3) 5_656 6_657 ?
Ca4 Ge4 Ca5 78.87(3) 5_666 6_657 ?
Ge5 Ge4 Ca5 63.72(3) 1_556 5_667 ?
Ge3 Ge4 Ca5 64.20(3) 1_556 5_667 ?
Ca3 Ge4 Ca5 71.46(3) 5_666 5_667 ?
Ca3 Ge4 Ca5 132.86(4) 5_656 5_667 ?
Ca4 Ge4 Ca5 130.86(4) 5_656 5_667 ?
Ca4 Ge4 Ca5 69.97(3) 5_666 5_667 ?
Ca5 Ge4 Ca5 135.86(2) 6_657 5_667 ?
Ge5 Ge4 Ca5 63.72(3) 1_556 5_657 ?
Ge3 Ge4 Ca5 64.20(3) 1_556 5_657 ?
Ca3 Ge4 Ca5 132.86(4) 5_666 5_657 ?
Ca3 Ge4 Ca5 71.46(3) 5_656 5_657 ?
Ca4 Ge4 Ca5 69.97(3) 5_656 5_657 ?
Ca4 Ge4 Ca5 130.86(4) 5_666 5_657 ?
Ca5 Ge4 Ca5 135.86(2) 6_657 5_657 ?
Ca5 Ge4 Ca5 88.19(4) 5_667 5_657 ?
Ge1 Ge5 Ge4 102.19(3) 1_554 1_554 ?
Ge1 Ge5 Ca5 130.60(2) 1_554 5_656 ?
Ge4 Ge5 Ca5 68.32(3) 1_554 5_656 ?
Ge1 Ge5 Ca5 130.60(2) 1_554 5_666 ?
Ge4 Ge5 Ca5 68.32(3) 1_554 5_666 ?
Ca5 Ge5 Ca5 92.31(4) 5_656 5_666 ?
Ge1 Ge5 Ca4 125.06(4) 1_554 6_656 ?
Ge4 Ge5 Ca4 132.75(4) 1_554 6_656 ?
Ca5 Ge5 Ca4 79.65(3) 5_656 6_656 ?
Ca5 Ge5 Ca4 79.65(3) 5_666 6_656 ?
Ge1 Ge5 Ca1 66.99(3) 1_554 5_666 ?
Ge4 Ge5 Ca1 131.43(2) 1_554 5_666 ?
Ca5 Ge5 Ca1 154.55(4) 5_656 5_666 ?
Ca5 Ge5 Ca1 83.51(3) 5_666 5_666 ?
Ca4 Ge5 Ca1 74.90(3) 6_656 5_666 ?
Ge1 Ge5 Ca1 66.99(3) 1_554 5_656 ?
Ge4 Ge5 Ca1 131.43(2) 1_554 5_656 ?
Ca5 Ge5 Ca1 83.51(3) 5_656 5_656 ?
Ca5 Ge5 Ca1 154.55(4) 5_666 5_656 ?
Ca4 Ge5 Ca1 74.90(3) 6_656 5_656 ?
Ca1 Ge5 Ca1 89.56(4) 5_666 5_656 ?
Ge1 Ge5 Ca3 62.23(3) 1_554 5_655 ?
Ge4 Ge5 Ca3 63.42(3) 1_554 5_655 ?
Ca5 Ge5 Ca3 71.08(3) 5_656 5_655 ?
Ca5 Ge5 Ca3 131.74(4) 5_666 5_655 ?
Ca4 Ge5 Ca3 136.447(18) 6_656 5_655 ?
Ca1 Ge5 Ca3 129.22(4) 5_666 5_655 ?
Ca1 Ge5 Ca3 70.45(3) 5_656 5_655 ?
Ge1 Ge5 Ca3 62.23(3) 1_554 5_665 ?
Ge4 Ge5 Ca3 63.42(3) 1_554 5_665 ?
Ca5 Ge5 Ca3 131.74(4) 5_656 5_665 ?
Ca5 Ge5 Ca3 71.08(3) 5_666 5_665 ?
Ca4 Ge5 Ca3 136.447(18) 6_656 5_665 ?
Ca1 Ge5 Ca3 70.45(3) 5_666 5_665 ?
Ca1 Ge5 Ca3 129.22(4) 5_656 5_665 ?
Ca3 Ge5 Ca3 86.69(3) 5_655 5_665 ?
Ge5 Ge1 Ag1 123.184(17) 1_556 5_666 ?
Ge5 Ge1 Mg1 123.184(17) 1_556 5_666 ?
Ag1 Ge1 Mg1 0.00(3) 5_666 5_666 ?
Ge5 Ge1 Ag1 123.184(17) 1_556 5_656 ?
Ag1 Ge1 Ag1 111.21(3) 5_666 5_656 ?
Mg1 Ge1 Ag1 111.21(3) 5_666 5_656 ?
Ge5 Ge1 Mg1 123.184(17) 1_556 5_656 ?
Ag1 Ge1 Mg1 111.21(3) 5_666 5_656 ?
Mg1 Ge1 Mg1 111.21(3) 5_666 5_656 ?
Ag1 Ge1 Mg1 0.00(3) 5_656 5_656 ?
Ge5 Ge1 Mg1 106.43(3) 1_556 1_656 ?
Ag1 Ge1 Mg1 73.20(2) 5_666 1_656 ?
Mg1 Ge1 Mg1 73.20(2) 5_666 1_656 ?
Ag1 Ge1 Mg1 73.20(2) 5_656 1_656 ?
Mg1 Ge1 Mg1 73.20(2) 5_656 1_656 ?
Ge5 Ge1 Ag1 106.43(3) 1_556 1_656 ?
Ag1 Ge1 Ag1 73.20(2) 5_666 1_656 ?
Mg1 Ge1 Ag1 73.20(2) 5_666 1_656 ?
Ag1 Ge1 Ag1 73.20(2) 5_656 1_656 ?
Mg1 Ge1 Ag1 73.20(2) 5_656 1_656 ?
Mg1 Ge1 Ag1 0.00(2) 1_656 1_656 ?
Ge5 Ge1 Ca2 132.31(4) 1_556 . ?
Ag1 Ge1 Ca2 74.63(2) 5_666 . ?
Mg1 Ge1 Ca2 74.63(2) 5_666 . ?
Ag1 Ge1 Ca2 74.63(2) 5_656 . ?
Mg1 Ge1 Ca2 74.63(2) 5_656 . ?
Mg1 Ge1 Ca2 121.25(4) 1_656 . ?
Ag1 Ge1 Ca2 121.25(4) 1_656 . ?
Ge5 Ge1 Ca3 70.19(3) 1_556 5_656 ?
Ag1 Ge1 Ca3 150.54(4) 5_666 5_656 ?
Mg1 Ge1 Ca3 150.54(4) 5_666 5_656 ?
Ag1 Ge1 Ca3 70.51(2) 5_656 5_656 ?
Mg1 Ge1 Ca3 70.51(2) 5_656 5_656 ?
Mg1 Ge1 Ca3 131.71(2) 1_656 5_656 ?
Ag1 Ge1 Ca3 131.71(2) 1_656 5_656 ?
Ca2 Ge1 Ca3 77.82(3) . 5_656 ?
Ge5 Ge1 Ca3 70.19(3) 1_556 5_666 ?
Ag1 Ge1 Ca3 70.51(2) 5_666 5_666 ?
Mg1 Ge1 Ca3 70.51(2) 5_666 5_666 ?
Ag1 Ge1 Ca3 150.54(4) 5_656 5_666 ?
Mg1 Ge1 Ca3 150.54(4) 5_656 5_666 ?
Mg1 Ge1 Ca3 131.71(2) 1_656 5_666 ?
Ag1 Ge1 Ca3 131.71(2) 1_656 5_666 ?
Ca2 Ge1 Ca3 77.82(3) . 5_666 ?
Ca3 Ge1 Ca3 93.74(4) 5_656 5_666 ?
Ge5 Ge1 Ca1 65.76(3) 1_556 5_667 ?
Ag1 Ge1 Ca1 64.33(3) 5_666 5_667 ?
Mg1 Ge1 Ca1 64.33(3) 5_666 5_667 ?
Ag1 Ge1 Ca1 135.92(4) 5_656 5_667 ?
Mg1 Ge1 Ca1 135.92(4) 5_656 5_667 ?
Mg1 Ge1 Ca1 63.46(3) 1_656 5_667 ?
Ag1 Ge1 Ca1 63.46(3) 1_656 5_667 ?
Ca2 Ge1 Ca1 135.27(2) . 5_667 ?
Ca3 Ge1 Ca1 135.95(4) 5_656 5_667 ?
Ca3 Ge1 Ca1 72.55(3) 5_666 5_667 ?
Ge5 Ge1 Ca1 65.76(3) 1_556 5_657 ?
Ag1 Ge1 Ca1 135.92(4) 5_666 5_657 ?
Mg1 Ge1 Ca1 135.92(4) 5_666 5_657 ?
Ag1 Ge1 Ca1 64.33(3) 5_656 5_657 ?
Mg1 Ge1 Ca1 64.33(3) 5_656 5_657 ?
Mg1 Ge1 Ca1 63.46(3) 1_656 5_657 ?
Ag1 Ge1 Ca1 63.46(3) 1_656 5_657 ?
Ca2 Ge1 Ca1 135.27(2) . 5_657 ?
Ca3 Ge1 Ca1 72.55(3) 5_656 5_657 ?
Ca3 Ge1 Ca1 135.95(4) 5_666 5_657 ?
Ca1 Ge1 Ca1 88.50(4) 5_667 5_657 ?
Ge2 Ag2 Ge2 109.15(5) 2_655 2_665 ?
Ge2 Ag2 Ge3 116.68(3) 2_655 1_556 ?
Ge2 Ag2 Ge3 116.68(3) 2_665 1_556 ?
Ge2 Ag2 Ge2 106.43(4) 2_655 6_557 ?
Ge2 Ag2 Ge2 106.43(4) 2_665 6_557 ?
Ge3 Ag2 Ge2 100.02(4) 1_556 6_557 ?
Ge2 Ag2 Ca2 166.54(4) 2_655 2_665 ?
Ge2 Ag2 Ca2 82.18(2) 2_665 2_665 ?
Ge3 Ag2 Ca2 61.48(3) 1_556 2_665 ?
Ge2 Ag2 Ca2 62.31(3) 6_557 2_665 ?
Ge2 Ag2 Ca2 82.18(2) 2_655 2_655 ?
Ge2 Ag2 Ca2 166.54(4) 2_665 2_655 ?
Ge3 Ag2 Ca2 61.48(3) 1_556 2_655 ?
Ge2 Ag2 Ca2 62.31(3) 6_557 2_655 ?
Ca2 Ag2 Ca2 85.72(4) 2_665 2_655 ?
Ge2 Ag2 Ca2 63.16(3) 2_655 6_557 ?
Ge2 Ag2 Ca2 63.16(3) 2_665 6_557 ?
Ge3 Ag2 Ca2 179.62(6) 1_556 6_557 ?
Ge2 Ag2 Ca2 80.36(4) 6_557 6_557 ?
Ca2 Ag2 Ca2 118.76(4) 2_665 6_557 ?
Ca2 Ag2 Ca2 118.76(4) 2_655 6_557 ?
Ge2 Ag2 Mg2 54.74(2) 2_655 5_657 ?
Ge2 Ag2 Mg2 120.60(6) 2_665 5_657 ?
Ge3 Ag2 Mg2 121.02(5) 1_556 5_657 ?
Ge2 Ag2 Mg2 51.68(4) 6_557 5_657 ?
Ca2 Ag2 Mg2 113.57(6) 2_665 5_657 ?
Ca2 Ag2 Mg2 59.55(3) 2_655 5_657 ?
Ca2 Ag2 Mg2 59.21(4) 6_557 5_657 ?
Ge2 Ag2 Ag2 54.74(2) 2_655 5_657 ?
Ge2 Ag2 Ag2 120.60(6) 2_665 5_657 ?
Ge3 Ag2 Ag2 121.02(5) 1_556 5_657 ?
Ge2 Ag2 Ag2 51.68(4) 6_557 5_657 ?
Ca2 Ag2 Ag2 113.57(6) 2_665 5_657 ?
Ca2 Ag2 Ag2 59.55(3) 2_655 5_657 ?
Ca2 Ag2 Ag2 59.21(4) 6_557 5_657 ?
Mg2 Ag2 Ag2 0.00(3) 5_657 5_657 ?
Ge2 Ag2 Mg2 120.60(6) 2_655 5_667 ?
Ge2 Ag2 Mg2 54.74(2) 2_665 5_667 ?
Ge3 Ag2 Mg2 121.02(5) 1_556 5_667 ?
Ge2 Ag2 Mg2 51.68(4) 6_557 5_667 ?
Ca2 Ag2 Mg2 59.55(3) 2_665 5_667 ?
Ca2 Ag2 Mg2 113.57(6) 2_655 5_667 ?
Ca2 Ag2 Mg2 59.21(4) 6_557 5_667 ?
Mg2 Ag2 Mg2 83.60(6) 5_657 5_667 ?
Ag2 Ag2 Mg2 83.60(6) 5_657 5_667 ?
Ge2 Ag2 Ag2 120.60(6) 2_655 5_667 ?
Ge2 Ag2 Ag2 54.74(2) 2_665 5_667 ?
Ge3 Ag2 Ag2 121.02(5) 1_556 5_667 ?
Ge2 Ag2 Ag2 51.68(4) 6_557 5_667 ?
Ca2 Ag2 Ag2 59.55(3) 2_665 5_667 ?
Ca2 Ag2 Ag2 113.57(6) 2_655 5_667 ?
Ca2 Ag2 Ag2 59.21(4) 6_557 5_667 ?
Mg2 Ag2 Ag2 83.60(6) 5_657 5_667 ?
Ag2 Ag2 Ag2 83.60(6) 5_657 5_667 ?
Mg2 Ag2 Ag2 0.00(3) 5_667 5_667 ?
Ge2 Ag2 Ca1 60.00(3) 2_655 6_657 ?
Ge2 Ag2 Ca1 60.00(3) 2_665 6_657 ?
Ge3 Ag2 Ca1 110.41(5) 1_556 6_657 ?
Ge2 Ag2 Ca1 149.58(5) 6_557 6_657 ?
Ca2 Ag2 Ca1 133.45(3) 2_665 6_657 ?
Ca2 Ag2 Ca1 133.45(3) 2_655 6_657 ?
Ca2 Ag2 Ca1 69.22(4) 6_557 6_657 ?
Mg2 Ag2 Ca1 108.97(5) 5_657 6_657 ?
Ag2 Ag2 Ca1 108.97(5) 5_657 6_657 ?
Mg2 Ag2 Ca1 108.97(5) 5_667 6_657 ?
Ag2 Ag2 Ca1 108.97(5) 5_667 6_657 ?
Ge2 Ca1 Ge2 91.73(4) 5_656 5_666 ?
Ge2 Ca1 Ge5 151.15(5) 5_656 5_666 ?
Ge2 Ca1 Ge5 82.234(18) 5_666 5_666 ?
Ge2 Ca1 Ge5 82.234(18) 5_656 5_656 ?
Ge2 Ca1 Ge5 151.15(5) 5_666 5_656 ?
Ge5 Ca1 Ge5 89.56(4) 5_666 5_656 ?
Ge2 Ca1 Mg1 114.33(4) 5_656 1_556 ?
Ge2 Ca1 Mg1 114.33(4) 5_666 1_556 ?
Ge5 Ca1 Mg1 93.68(3) 5_666 1_556 ?
Ge5 Ca1 Mg1 93.68(3) 5_656 1_556 ?
Ge2 Ca1 Ag1 114.33(4) 5_656 1_556 ?
Ge2 Ca1 Ag1 114.33(4) 5_666 1_556 ?
Ge5 Ca1 Ag1 93.68(3) 5_666 1_556 ?
Ge5 Ca1 Ag1 93.68(3) 5_656 1_556 ?
Mg1 Ca1 Ag1 0.00(2) 1_556 1_556 ?
Ge2 Ca1 Mg1 51.66(2) 5_656 5_556 ?
Ge2 Ca1 Mg1 112.58(4) 5_666 5_556 ?
Ge5 Ca1 Mg1 155.41(5) 5_666 5_556 ?
Ge5 Ca1 Mg1 85.621(16) 5_656 5_556 ?
Mg1 Ca1 Mg1 62.67(3) 1_556 5_556 ?
Ag1 Ca1 Mg1 62.67(3) 1_556 5_556 ?
Ge2 Ca1 Ag1 51.66(2) 5_656 5_556 ?
Ge2 Ca1 Ag1 112.58(4) 5_666 5_556 ?
Ge5 Ca1 Ag1 155.41(5) 5_666 5_556 ?
Ge5 Ca1 Ag1 85.621(16) 5_656 5_556 ?
Mg1 Ca1 Ag1 62.67(3) 1_556 5_556 ?
Ag1 Ca1 Ag1 62.67(3) 1_556 5_556 ?
Mg1 Ca1 Ag1 0.000(17) 5_556 5_556 ?
Ge2 Ca1 Ag1 112.58(4) 5_656 5_566 ?
Ge2 Ca1 Ag1 51.66(2) 5_666 5_566 ?
Ge5 Ca1 Ag1 85.621(17) 5_666 5_566 ?
Ge5 Ca1 Ag1 155.41(5) 5_656 5_566 ?
Mg1 Ca1 Ag1 62.67(3) 1_556 5_566 ?
Ag1 Ca1 Ag1 62.67(3) 1_556 5_566 ?
Mg1 Ca1 Ag1 88.80(4) 5_556 5_566 ?
Ag1 Ca1 Ag1 88.80(4) 5_556 5_566 ?
Ge2 Ca1 Mg1 112.58(4) 5_656 5_566 ?
Ge2 Ca1 Mg1 51.66(2) 5_666 5_566 ?
Ge5 Ca1 Mg1 85.621(17) 5_666 5_566 ?
Ge5 Ca1 Mg1 155.41(5) 5_656 5_566 ?
Mg1 Ca1 Mg1 62.67(3) 1_556 5_566 ?
Ag1 Ca1 Mg1 62.67(3) 1_556 5_566 ?
Mg1 Ca1 Mg1 88.80(4) 5_556 5_566 ?
Ag1 Ca1 Mg1 88.80(4) 5_556 5_566 ?
Ag1 Ca1 Mg1 0.000(17) 5_566 5_566 ?
Ge2 Ca1 Ge1 161.01(5) 5_656 5_667 ?
Ge2 Ca1 Ge1 86.790(16) 5_666 5_667 ?
Ge5 Ca1 Ge1 47.24(2) 5_666 5_667 ?
Ge5 Ca1 Ge1 107.71(4) 5_656 5_667 ?
Mg1 Ca1 Ge1 50.26(2) 1_556 5_667 ?
Ag1 Ca1 Ge1 50.26(2) 1_556 5_667 ?
Mg1 Ca1 Ge1 111.81(5) 5_556 5_667 ?
Ag1 Ca1 Ge1 111.81(5) 5_556 5_667 ?
Ag1 Ca1 Ge1 52.78(2) 5_566 5_667 ?
Mg1 Ca1 Ge1 52.78(2) 5_566 5_667 ?
Ge2 Ca1 Ge1 86.790(16) 5_656 5_657 ?
Ge2 Ca1 Ge1 161.01(5) 5_666 5_657 ?
Ge5 Ca1 Ge1 107.71(4) 5_666 5_657 ?
Ge5 Ca1 Ge1 47.24(2) 5_656 5_657 ?
Mg1 Ca1 Ge1 50.26(2) 1_556 5_657 ?
Ag1 Ca1 Ge1 50.26(2) 1_556 5_657 ?
Mg1 Ca1 Ge1 52.78(2) 5_556 5_657 ?
Ag1 Ca1 Ge1 52.78(2) 5_556 5_657 ?
Ag1 Ca1 Ge1 111.81(5) 5_566 5_657 ?
Mg1 Ca1 Ge1 111.81(5) 5_566 5_657 ?
Ge1 Ca1 Ge1 88.50(4) 5_667 5_657 ?
Ge1 Ca2 Ge3 106.05(4) . 2_655 ?
Ge1 Ca2 Ge3 106.05(4) . 2_665 ?
Ge3 Ca2 Ge3 90.86(4) 2_655 2_665 ?
Ge1 Ca2 Ge2 95.31(4) . 5_766 ?
Ge3 Ca2 Ge2 158.39(5) 2_655 5_766 ?
Ge3 Ca2 Ge2 86.216(16) 2_665 5_766 ?
Ge1 Ca2 Ge2 95.31(4) . 5_756 ?
Ge3 Ca2 Ge2 86.216(16) 2_655 5_756 ?
Ge3 Ca2 Ge2 158.39(5) 2_665 5_756 ?
Ge2 Ca2 Ge2 88.67(4) 5_766 5_756 ?
Ge1 Ca2 Mg2 136.58(2) . 2_654 ?
Ge3 Ca2 Mg2 51.56(3) 2_655 2_654 ?
Ge3 Ca2 Mg2 110.33(5) 2_665 2_654 ?
Ge2 Ca2 Mg2 109.75(5) 5_766 2_654 ?
Ge2 Ca2 Mg2 52.22(3) 5_756 2_654 ?
Ge1 Ca2 Ag2 136.58(2) . 2_654 ?
Ge3 Ca2 Ag2 51.56(3) 2_655 2_654 ?
Ge3 Ca2 Ag2 110.33(5) 2_665 2_654 ?
Ge2 Ca2 Ag2 109.75(5) 5_766 2_654 ?
Ge2 Ca2 Ag2 52.22(3) 5_756 2_654 ?
Mg2 Ca2 Ag2 0.00(4) 2_654 2_654 ?
Ge1 Ca2 Mg2 136.58(2) . 2_664 ?
Ge3 Ca2 Mg2 110.33(4) 2_655 2_664 ?
Ge3 Ca2 Mg2 51.56(3) 2_665 2_664 ?
Ge2 Ca2 Mg2 52.22(3) 5_766 2_664 ?
Ge2 Ca2 Mg2 109.75(5) 5_756 2_664 ?
Mg2 Ca2 Mg2 85.72(4) 2_654 2_664 ?
Ag2 Ca2 Mg2 85.72(4) 2_654 2_664 ?
Ge1 Ca2 Ag2 136.58(2) . 2_664 ?
Ge3 Ca2 Ag2 110.33(4) 2_655 2_664 ?
Ge3 Ca2 Ag2 51.56(3) 2_665 2_664 ?
Ge2 Ca2 Ag2 52.22(3) 5_766 2_664 ?
Ge2 Ca2 Ag2 109.75(5) 5_756 2_664 ?
Mg2 Ca2 Ag2 85.72(4) 2_654 2_664 ?
Ag2 Ca2 Ag2 85.72(4) 2_654 2_664 ?
Mg2 Ca2 Ag2 0.00(3) 2_664 2_664 ?
Ge1 Ca2 Mg2 123.28(5) . 6_657 ?
Ge3 Ca2 Mg2 112.80(4) 2_655 6_657 ?
Ge3 Ca2 Mg2 112.80(4) 2_665 6_657 ?
Ge2 Ca2 Mg2 49.93(2) 5_766 6_657 ?
Ge2 Ca2 Mg2 49.93(2) 5_756 6_657 ?
Mg2 Ca2 Mg2 61.24(4) 2_654 6_657 ?
Ag2 Ca2 Mg2 61.24(4) 2_654 6_657 ?
Mg2 Ca2 Mg2 61.24(4) 2_664 6_657 ?
Ag2 Ca2 Mg2 61.24(4) 2_664 6_657 ?
Ge1 Ca2 Ag2 123.28(5) . 6_657 ?
Ge3 Ca2 Ag2 112.80(4) 2_655 6_657 ?
Ge3 Ca2 Ag2 112.80(4) 2_665 6_657 ?
Ge2 Ca2 Ag2 49.93(2) 5_766 6_657 ?
Ge2 Ca2 Ag2 49.93(2) 5_756 6_657 ?
Mg2 Ca2 Ag2 61.24(4) 2_654 6_657 ?
Ag2 Ca2 Ag2 61.24(4) 2_654 6_657 ?
Mg2 Ca2 Ag2 61.24(4) 2_664 6_657 ?
Ag2 Ca2 Ag2 61.24(4) 2_664 6_657 ?
Mg2 Ca2 Ag2 0.00(4) 6_657 6_657 ?
Ge1 Ca2 Ag1 48.68(2) . 5_666 ?
Ge3 Ca2 Ag1 153.01(5) 2_655 5_666 ?
Ge3 Ca2 Ag1 88.591(17) 2_665 5_666 ?
Ge2 Ca2 Ag1 48.43(2) 5_766 5_666 ?
Ge2 Ca2 Ag1 103.57(4) 5_756 5_666 ?
Mg2 Ca2 Ag1 151.44(5) 2_654 5_666 ?
Ag2 Ca2 Ag1 151.44(5) 2_654 5_666 ?
Mg2 Ca2 Ag1 90.23(2) 2_664 5_666 ?
Ag2 Ca2 Ag1 90.23(2) 2_664 5_666 ?
Mg2 Ca2 Ag1 92.14(4) 6_657 5_666 ?
Ag2 Ca2 Ag1 92.14(4) 6_657 5_666 ?
Ge1 Ca3 Ge1 93.74(4) 5_656 5_666 ?
Ge1 Ca3 Ge4 151.51(5) 5_656 5_666 ?
Ge1 Ca3 Ge4 80.330(18) 5_666 5_666 ?
Ge1 Ca3 Ge4 80.330(18) 5_656 5_656 ?
Ge1 Ca3 Ge4 151.51(5) 5_666 5_656 ?
Ge4 Ca3 Ge4 91.65(4) 5_666 5_656 ?
Ge1 Ca3 Ge3 102.56(3) 5_656 6_556 ?
Ge1 Ca3 Ge3 102.56(3) 5_666 6_556 ?
Ge4 Ca3 Ge3 105.94(3) 5_666 6_556 ?
Ge4 Ca3 Ge3 105.94(3) 5_656 6_556 ?
Ge1 Ca3 Ge5 47.58(2) 5_656 5_655 ?
Ge1 Ca3 Ge5 109.10(4) 5_666 5_655 ?
Ge4 Ca3 Ge5 107.95(4) 5_666 5_655 ?
Ge4 Ca3 Ge5 47.44(2) 5_656 5_655 ?
Ge3 Ca3 Ge5 136.623(17) 6_556 5_655 ?
Ge1 Ca3 Ge5 109.10(4) 5_656 5_665 ?
Ge1 Ca3 Ge5 47.58(2) 5_666 5_665 ?
Ge4 Ca3 Ge5 47.44(2) 5_666 5_665 ?
Ge4 Ca3 Ge5 107.95(4) 5_656 5_665 ?
Ge3 Ca3 Ge5 136.623(17) 6_556 5_665 ?
Ge5 Ca3 Ge5 86.69(3) 5_655 5_665 ?
Ge1 Ca3 Mg1 49.79(2) 5_656 . ?
Ge1 Ca3 Mg1 49.79(2) 5_666 . ?
Ge4 Ca3 Mg1 130.06(3) 5_666 . ?
Ge4 Ca3 Mg1 130.06(3) 5_656 . ?
Ge3 Ca3 Mg1 89.34(4) 6_556 . ?
Ge5 Ca3 Mg1 89.10(3) 5_655 . ?
Ge5 Ca3 Mg1 89.10(3) 5_665 . ?
Ge1 Ca3 Ca5 98.63(3) 5_656 1_554 ?
Ge1 Ca3 Ca5 98.63(3) 5_666 1_554 ?
Ge4 Ca3 Ca5 55.47(3) 5_666 1_554 ?
Ge4 Ca3 Ca5 55.47(3) 5_656 1_554 ?
Ge3 Ca3 Ca5 148.78(5) 6_556 1_554 ?
Ge5 Ca3 Ca5 52.48(2) 5_655 1_554 ?
Ge5 Ca3 Ca5 52.48(2) 5_665 1_554 ?
Mg1 Ca3 Ca5 121.88(4) . 1_554 ?
Ge1 Ca3 Ca1 55.47(2) 5_656 1_554 ?
Ge1 Ca3 Ca1 55.47(2) 5_666 1_554 ?
Ge4 Ca3 Ca1 99.88(4) 5_666 1_554 ?
Ge4 Ca3 Ca1 99.88(4) 5_656 1_554 ?
Ge3 Ca3 Ca1 142.54(5) 6_556 1_554 ?
Ge5 Ca3 Ca1 53.73(2) 5_655 1_554 ?
Ge5 Ca3 Ca1 53.73(2) 5_665 1_554 ?
Mg1 Ca3 Ca1 53.20(3) . 1_554 ?
Ca5 Ca3 Ca1 68.68(4) 1_554 1_554 ?
Ge1 Ca3 Ca5 154.48(5) 5_656 2_564 ?
Ge1 Ca3 Ca5 92.56(2) 5_666 2_564 ?
Ge4 Ca3 Ca5 54.01(3) 5_666 2_564 ?
Ge4 Ca3 Ca5 104.80(4) 5_656 2_564 ?
Ge3 Ca3 Ca5 51.93(3) 6_556 2_564 ?
Ge5 Ca3 Ca5 149.80(5) 5_655 2_564 ?
Ge5 Ca3 Ca5 93.29(2) 5_665 2_564 ?
Mg1 Ca3 Ca5 121.11(4) . 2_564 ?
Ca5 Ca3 Ca5 104.82(3) 1_554 2_564 ?
Ca1 Ca3 Ca5 143.904(17) 1_554 2_564 ?
Ge2 Ca4 Ge4 133.72(2) 6_556 5_656 ?
Ge2 Ca4 Ge4 133.72(2) 6_556 5_666 ?
Ge4 Ca4 Ge4 91.47(4) 5_656 5_666 ?
Ge2 Ca4 Ge3 97.49(4) 6_556 5_655 ?
Ge4 Ca4 Ge3 48.44(2) 5_656 5_655 ?
Ge4 Ca4 Ge3 110.37(4) 5_666 5_655 ?
Ge2 Ca4 Ge3 97.49(4) 6_556 5_665 ?
Ge4 Ca4 Ge3 110.37(4) 5_656 5_665 ?
Ge4 Ca4 Ge3 48.44(2) 5_666 5_665 ?
Ge3 Ca4 Ge3 89.85(4) 5_655 5_665 ?
Ge2 Ca4 Ge5 82.38(4) 6_556 6_556 ?
Ge4 Ca4 Ge5 100.83(4) 5_656 6_556 ?
Ge4 Ca4 Ge5 100.83(4) 5_666 6_556 ?
Ge3 Ca4 Ge5 134.995(19) 5_655 6_556 ?
Ge3 Ca4 Ge5 134.995(19) 5_665 6_556 ?
Ge2 Ca4 Mg2 49.21(3) 6_556 5_666 ?
Ge4 Ca4 Mg2 151.53(5) 5_656 5_666 ?
Ge4 Ca4 Mg2 87.05(2) 5_666 5_666 ?
Ge3 Ca4 Mg2 105.88(4) 5_655 5_666 ?
Ge3 Ca4 Mg2 49.89(3) 5_665 5_666 ?
Ge5 Ca4 Mg2 107.38(4) 6_556 5_666 ?
Ge2 Ca4 Ag2 49.21(3) 6_556 5_666 ?
Ge4 Ca4 Ag2 151.53(5) 5_656 5_666 ?
Ge4 Ca4 Ag2 87.05(2) 5_666 5_666 ?
Ge3 Ca4 Ag2 105.88(4) 5_655 5_666 ?
Ge3 Ca4 Ag2 49.89(3) 5_665 5_666 ?
Ge5 Ca4 Ag2 107.38(4) 6_556 5_666 ?
Mg2 Ca4 Ag2 0.00(5) 5_666 5_666 ?
Ge2 Ca4 Mg2 49.21(3) 6_556 5_656 ?
Ge4 Ca4 Mg2 87.05(2) 5_656 5_656 ?
Ge4 Ca4 Mg2 151.53(5) 5_666 5_656 ?
Ge3 Ca4 Mg2 49.89(3) 5_655 5_656 ?
Ge3 Ca4 Mg2 105.88(4) 5_665 5_656 ?
Ge5 Ca4 Mg2 107.38(4) 6_556 5_656 ?
Mg2 Ca4 Mg2 81.05(4) 5_666 5_656 ?
Ag2 Ca4 Mg2 81.05(4) 5_666 5_656 ?
Ge2 Ca4 Ag2 49.21(3) 6_556 5_656 ?
Ge4 Ca4 Ag2 87.05(2) 5_656 5_656 ?
Ge4 Ca4 Ag2 151.53(5) 5_666 5_656 ?
Ge3 Ca4 Ag2 49.89(3) 5_655 5_656 ?
Ge3 Ca4 Ag2 105.88(4) 5_665 5_656 ?
Ge5 Ca4 Ag2 107.38(4) 6_556 5_656 ?
Mg2 Ca4 Ag2 81.05(4) 5_666 5_656 ?
Ag2 Ca4 Ag2 81.05(4) 5_666 5_656 ?
Mg2 Ca4 Ag2 0.00(5) 5_656 5_656 ?
Ge2 Ca4 Ca5 134.88(5) 6_556 1_554 ?
Ge4 Ca4 Ca5 56.19(3) 5_656 1_554 ?
Ge4 Ca4 Ca5 56.19(3) 5_666 1_554 ?
Ge3 Ca4 Ca5 54.19(2) 5_655 1_554 ?
Ge3 Ca4 Ca5 54.19(2) 5_665 1_554 ?
Ge5 Ca4 Ca5 142.74(5) 6_556 1_554 ?
Mg2 Ca4 Ca5 100.69(4) 5_666 1_554 ?
Ag2 Ca4 Ca5 100.69(4) 5_666 1_554 ?
Mg2 Ca4 Ca5 100.69(4) 5_656 1_554 ?
Ag2 Ca4 Ca5 100.69(4) 5_656 1_554 ?
Ge2 Ca4 Ca2 69.65(3) 6_556 6_556 ?
Ge4 Ca4 Ca2 98.59(4) 5_656 6_556 ?
Ge4 Ca4 Ca2 98.59(4) 5_666 6_556 ?
Ge3 Ca4 Ca2 52.62(2) 5_655 6_556 ?
Ge3 Ca4 Ca2 52.62(2) 5_665 6_556 ?
Ge5 Ca4 Ca2 152.03(5) 6_556 6_556 ?
Mg2 Ca4 Ca2 53.73(3) 5_666 6_556 ?
Ag2 Ca4 Ca2 53.73(3) 5_666 6_556 ?
Mg2 Ca4 Ca2 53.73(3) 5_656 6_556 ?
Ag2 Ca4 Ca2 53.73(3) 5_656 6_556 ?
Ca5 Ca4 Ca2 65.23(4) 1_554 6_556 ?
Ge5 Ca5 Ge5 92.30(4) 5_656 5_666 ?
Ge5 Ca5 Ge3 152.71(6) 5_656 5_666 ?
Ge5 Ca5 Ge3 81.756(19) 5_666 5_666 ?
Ge5 Ca5 Ge3 81.756(19) 5_656 5_656 ?
Ge5 Ca5 Ge3 152.71(6) 5_666 5_656 ?
Ge3 Ca5 Ge3 91.38(4) 5_666 5_656 ?
Ge5 Ca5 Ge4 100.64(4) 5_656 6_557 ?
Ge5 Ca5 Ge4 100.64(4) 5_666 6_557 ?
Ge3 Ca5 Ge4 106.62(4) 5_666 6_557 ?
Ge3 Ca5 Ge4 106.62(4) 5_656 6_557 ?
Ge5 Ca5 Ge4 109.51(4) 5_656 5_667 ?
Ge5 Ca5 Ge4 47.95(2) 5_666 5_667 ?
Ge3 Ca5 Ge4 48.02(2) 5_666 5_667 ?
Ge3 Ca5 Ge4 109.09(4) 5_656 5_667 ?
Ge4 Ca5 Ge4 135.74(2) 6_557 5_667 ?
Ge5 Ca5 Ge4 47.95(2) 5_656 5_657 ?
Ge5 Ca5 Ge4 109.51(4) 5_666 5_657 ?
Ge3 Ca5 Ge4 109.09(4) 5_666 5_657 ?
Ge3 Ca5 Ge4 48.02(2) 5_656 5_657 ?
Ge4 Ca5 Ge4 135.74(2) 6_557 5_657 ?
Ge4 Ca5 Ge4 88.19(4) 5_667 5_657 ?
Ge5 Ca5 Ca4 100.35(4) 5_656 1_556 ?
Ge5 Ca5 Ca4 100.35(4) 5_666 1_556 ?
Ge3 Ca5 Ca4 55.26(3) 5_666 1_556 ?
Ge3 Ca5 Ca4 55.26(3) 5_656 1_556 ?
Ge4 Ca5 Ca4 149.51(5) 6_557 1_556 ?
Ge4 Ca5 Ca4 53.84(3) 5_667 1_556 ?
Ge4 Ca5 Ca4 53.84(3) 5_657 1_556 ?
Ge5 Ca5 Ca3 56.44(3) 5_656 1_556 ?
Ge5 Ca5 Ca3 56.44(3) 5_666 1_556 ?
Ge3 Ca5 Ca3 99.24(4) 5_666 1_556 ?
Ge3 Ca5 Ca3 99.24(4) 5_656 1_556 ?
Ge4 Ca5 Ca3 142.53(5) 6_557 1_556 ?
Ge4 Ca5 Ca3 53.07(3) 5_667 1_556 ?
Ge4 Ca5 Ca3 53.07(3) 5_657 1_556 ?
Ca4 Ca5 Ca3 67.96(4) 1_556 1_556 ?
Ge5 Ca5 Ca3 92.30(2) 5_656 2 ?
Ge5 Ca5 Ca3 152.61(5) 5_666 2 ?
Ge3 Ca5 Ca3 105.22(4) 5_666 2 ?
Ge3 Ca5 Ca3 54.64(3) 5_656 2 ?
Ge4 Ca5 Ca3 51.98(3) 6_557 2 ?
Ge4 Ca5 Ca3 151.41(5) 5_667 2 ?
Ge4 Ca5 Ca3 93.45(2) 5_657 2 ?
Ca4 Ca5 Ca3 105.34(4) 1_556 2 ?
Ca3 Ca5 Ca3 143.899(18) 1_556 2 ?
Ge5 Ca5 Ca3 152.61(5) 5_656 2_565 ?
Ge5 Ca5 Ca3 92.30(2) 5_666 2_565 ?
Ge3 Ca5 Ca3 54.64(3) 5_666 2_565 ?
Ge3 Ca5 Ca3 105.22(4) 5_656 2_565 ?
Ge4 Ca5 Ca3 51.98(3) 6_557 2_565 ?
Ge4 Ca5 Ca3 93.45(2) 5_667 2_565 ?
Ge4 Ca5 Ca3 151.41(5) 5_657 2_565 ?
Ca4 Ca5 Ca3 105.34(4) 1_556 2_565 ?
Ca3 Ca5 Ca3 143.899(18) 1_556 2_565 ?
Ca3 Ca5 Ca3 71.99(3) 2 2_565 ?
Ge5 Ca5 Ca2 131.86(2) 5_656 6_557 ?
Ge5 Ca5 Ca2 131.86(2) 5_666 6_557 ?
Ge3 Ca5 Ca2 50.37(2) 5_666 6_557 ?
Ge3 Ca5 Ca2 50.37(2) 5_656 6_557 ?
Ge4 Ca5 Ca2 90.12(4) 6_557 6_557 ?
Ge4 Ca5 Ca2 92.97(3) 5_667 6_557 ?
Ge4 Ca5 Ca2 92.97(3) 5_657 6_557 ?
Ca4 Ca5 Ca2 59.38(4) 1_556 6_557 ?
Ca3 Ca5 Ca2 127.35(5) 1_556 6_557 ?
Ca3 Ca5 Ca2 58.45(3) 2 6_557 ?
Ca3 Ca5 Ca2 58.45(3) 2_565 6_557 ?
 
_refine_diff_density_max    1.705
_refine_diff_density_min   -1.063
_refine_diff_density_rms    0.338

_shelxl_version_number 2013-4

_shelx_res_file
;
TITL Tw_Mg in Pnma
CELL 0.71073  23.1481   4.4736  11.0128  90.000  90.000  90.000
ZERR   4.00   0.0004   0.0001   0.0002   0.000   0.000   0.000
LATT  1
SYMM 0.5-X, -Y, 0.5+Z
SYMM -X, 0.5+Y, -Z
SYMM 0.5+X, 0.5-Y, 0.5-Z
SFAC CA GE AG Mg
UNIT 20 18.24 5.30 4.46

L.S. 14
BOND
exyz Mg1 Ag1
eadp Mg1 Ag1
exyz Mg2 Ag2
eadp Mg2 Ag2
acta
FMAP 2
PLAN 20

WGHT    0.028200    1.415700
EXTI    0.002565
FVAR       0.04153   1.00231   0.73231   0.21784
MG1   4    0.020271    0.250000    0.102577    40.50000    0.01106    0.01227 =
         0.01976    0.00000    0.00478    0.00000
AG1   3    0.020271    0.250000    0.102577   -40.50000    0.01106    0.01227 =
         0.01976    0.00000    0.00478    0.00000
GE2   2    0.973562    0.250000    0.332384    10.50000    0.00917    0.00760 =
         0.01177    0.00000   -0.00005    0.00000
GE3   2    0.657174    0.250000    0.090942    10.50000    0.00652    0.00989 =
         0.01195    0.00000    0.00082    0.00000
GE4   2    0.747135    0.250000    0.952465    10.50000    0.00670    0.01075 =
         0.01105    0.00000    0.00043    0.00000
GE5   2    0.833190    0.250000    0.099738    10.50000    0.00758    0.01062 =
         0.01132    0.00000    0.00006    0.00000
GE1   2    0.919443    0.250000    0.954693    20.50000    0.00947    0.00789 =
         0.01283    0.00000    0.00149    0.00000
AG2   3    0.551669    0.250000    0.966767   -30.50000    0.01549    0.01290 =
         0.01409    0.00000   -0.00378    0.00000
MG2   4    0.551669    0.250000    0.966767    30.50000    0.01549    0.01290 =
         0.01409    0.00000   -0.00378    0.00000
CA1   1    0.074168    0.250000    0.837248    10.50000    0.01553    0.01116 =
         0.01371    0.00000   -0.00373    0.00000
CA2   1    0.927745    0.250000    0.681340    10.50000    0.01010    0.01524 =
         0.01358    0.00000   -0.00108    0.00000
CA3   1    0.164700    0.250000    0.115426    10.50000    0.00926    0.00985 =
         0.01229    0.00000   -0.00135    0.00000
CA4   1    0.341797    0.250000    0.112676    10.50000    0.00918    0.01267 =
         0.01191    0.00000   -0.00130    0.00000
CA5   1    0.254771    0.250000    0.837961    10.50000    0.01082    0.01070 =
         0.01243    0.00000   -0.00051    0.00000
HKLF 4

REM  Tw_Mg in Pnma
REM R1 =  0.0368 for    1594 Fo > 4sig(Fo)  and  0.0586 for all    2138 data
REM     77 parameters refined using      0 restraints

END

WGHT      0.0258      0.8164

REM Highest difference peak  1.705,  deepest hole -1.063,  1-sigma level  0.338
Q1    1   0.9607  0.2500  0.2364  10.50000  0.05    1.70
Q2    1   0.2122  0.2500  0.8178  10.50000  0.05    1.64
Q3    1   0.1421  0.2500  0.1790  10.50000  0.05    1.57
Q4    1   0.2485  0.2500  0.9017  10.50000  0.05    1.43
Q5    1   0.9290  0.2500  1.0264  10.50000  0.05    1.35
Q6    1   0.6213  0.2500  0.1521  10.50000  0.05    1.35
Q7    1   0.6214  0.2500  0.1228  10.50000  0.05    1.34
Q8    1   0.5387  0.2500  0.8751  10.50000  0.05    1.32
Q9    1   0.9296  0.2500  0.7952  10.50000  0.05    1.31
Q10   1   0.9624  0.2500  0.9364  10.50000  0.05    1.30
Q11   1   0.9379  0.2500  0.3426  10.50000  0.05    1.30
Q12   1   1.0076  0.2500  0.3069  10.50000  0.05    1.27
Q13   1   0.0573  0.2500  0.0391  10.50000  0.05    1.26
Q14   1   0.8546  0.2500  0.0230  10.50000  0.05    1.23
Q15   1   0.6427  0.2500  0.2381  10.50000  0.05    1.20
Q16   1   0.2347  0.2500  0.9797  10.50000  0.05    1.16
Q17   1   0.0233  0.2500  0.7657  10.50000  0.05    1.16
Q18   1   0.7050  0.2500  0.9745  10.50000  0.05    1.10
Q19   1   0.8791  0.2500  0.8773  10.50000  0.05    1.09
Q20   1   0.6884  0.2500  0.1322  10.50000  0.05    1.08
;
_shelx_res_checksum   76868

_shelx_hkl_file
;
   5   0   0    0.51    0.11
  -5   0   0    0.89    0.17
  -6   0   0   10.21    0.31
   6   0   0    9.67    0.23
   7   0   0    0.00    0.13
  -7   0   0    0.13    0.19
   8   0   0    6.46    0.23
  -8   0   0    6.51    0.30
   9   0   0    0.30    0.15
  -9   0   0    0.15    0.20
 -10   0   0  214.25    1.49
  10   0   0  219.75    1.20
  11   0   0    3.71    0.24
 -11   0   0    3.99    0.31
 -12   0   0  303.51    1.92
  12   0   0  285.98    1.51
  13   0   0    1.50    0.22
 -13   0   0    1.48    0.28
  14   0   0   11.58    0.38
 -14   0   0   11.95    0.49
  15   0   0    0.28    0.21
 -15   0   0    0.15    0.30
 -16   0   0   29.61    0.78
 -17   0   0    0.73    0.76
 -17   0   0    0.48    0.37
 -18   0   0   22.28    1.26
 -18   0   0   21.00    0.73
 -19   0   0    0.45    0.40
 -19   0   0    0.91    0.82
 -20   0   0   14.53    0.68
 -20   0   0   16.23    1.15
 -21   0   0    2.51    0.82
 -21   0   0    2.73    0.46
 -22   0   0  180.96    2.12
 -22   0   0  185.09    3.24
 -23   0   0    3.81    0.88
 -24   0   0   25.77    1.45
 -25   0   0    1.38    0.90
 -26   0   0    3.73    0.98
 -27   0   0    1.33    0.87
 -28   0   0    9.59    1.21
 -29   0   0    0.79    1.01
 -30   0   0    5.69    1.14
 -31   0   0    0.73    1.04
 -32   0   0    0.48    1.11
 -33   0   0    1.02    1.07
   4   0   1    0.14    0.15
  -4   0   1    0.09    0.22
  -4   0   1    0.05    0.17
  -5   0  -1    0.96    0.13
  -5   0   1    1.17    0.26
   5   0   1    1.12    0.22
  -5   0   1    0.95    0.37
  -6   0   1    5.35    0.33
  -6   0   1    4.48    0.48
  -6   0  -1    4.51    0.19
   6   0   1    4.98    0.29
  -7   0   1    2.42    0.28
  -7   0  -1    2.38    0.17
  -7   0   1    2.40    0.41
   7   0   1    2.40    0.23
  -8   0  -1    6.07    0.24
   8   0   1    6.13    0.30
  -8   0   1    5.95    0.50
  -8   0   1    5.97    0.34
  -9   0   1    3.21    0.30
  -9   0   1    3.59    0.51
   9   0   1    4.01    0.27
  -9   0  -1    3.35    0.22
 -10   0  -1    1.29    0.20
 -10   0   1    1.35    0.47
  10   0   1    0.95    0.23
 -10   0   1    0.90    0.26
 -11   0   1   87.04    1.60
 -11   0  -1   87.72    0.92
 -11   0   1   93.94    1.19
  12   0   1    3.20    0.31
 -12   0  -1    2.76    0.27
 -12   0   1    2.89    0.58
 -12   0   1    2.81    0.34
  13   0   1    3.88    0.33
 -13   0   1    3.89    0.37
 -13   0  -1    3.77    0.30
 -13   0   1    4.47    0.62
 -14   0   1    2.58    0.65
 -14   0  -1    2.08    0.28
 -14   0   1    2.23    0.35
  14   0   1    1.82    0.30
 -15   0  -1    0.56    0.28
 -15   0   1    1.00    0.34
 -15   0   1    1.32    0.67
  15   0   1    0.98    0.30
  16   0   1    5.25    0.40
 -16   0  -1    5.37    0.41
 -16   0   1    4.89    0.46
 -17   0   1    2.14    0.41
  17   0   1    2.26    0.35
 -17   0  -1    2.28    0.36
 -17   0   1    3.16    0.78
 -18   0  -1    2.22    0.37
 -18   0   1    1.56    0.41
 -19   0   1   23.03    0.84
 -19   0   1   25.47    1.34
 -19   0  -1   24.17    0.75
 -20   0  -1    1.07    0.38
 -20   0   1    0.81    0.43
 -20   0   1    0.80    0.83
 -21   0  -1   35.42    1.53
 -21   0   1   38.54    1.60
 -22   0  -1    6.26    0.94
 -22   0   1    3.96    0.51
 -22   0   1    6.36    0.97
 -23   0   1   19.52    1.32
 -23   0   1   19.49    0.85
 -23   0  -1   18.88    1.28
 -24   0   1    0.34    0.46
 -24   0   1    0.75    0.88
 -24   0  -1    1.22    0.84
 -25   0   1    2.54    0.90
 -25   0  -1    2.07    0.87
 -26   0  -1    2.38    0.85
 -26   0   1    1.86    0.90
 -27   0  -1    0.77    0.90
 -27   0   1    1.24    0.89
 -28   0  -1    3.60    0.97
 -28   0   1    4.55    1.03
 -29   0   1    0.05    0.98
 -29   0  -1   -0.33    1.02
  30   0   1    1.94    1.16
 -30   0   1    0.72    1.05
 -30   0  -1    0.82    0.96
  31   0   1    4.13    1.25
 -31   0   1    2.66    1.13
 -31   0  -1    2.01    1.09
  32   0   1    0.82    1.19
 -32   0  -1    0.60    1.02
 -32   0   1    1.41    1.07
 -33   0   1   23.29    1.75
   0   0   2  101.35    0.74
   0   0   2  101.14    0.63
   1   0   2    3.35    0.16
  -1   0   2    3.73    0.20
  -1   0   2    4.05    0.26
  -1   0   2    3.70    0.15
  -2   0   2    8.39    0.25
  -2   0   2    9.23    0.24
  -2   0   2    9.45    0.32
  -2   0   2    9.04    0.34
   2   0   2    9.01    0.32
   2   0   2    8.52    0.19
   3   0   2    8.01    0.36
   3   0   2    8.73    0.39
  -3   0   2    8.31    0.35
  -3   0   2    8.09    0.28
  -3   0   2    8.96    0.36
  -3   0   2    8.50    0.28
   4   0   2    0.76    0.43
  -4   0   2    0.95    0.32
  -4   0   2    0.90    0.24
   4   0   2    1.11    0.33
   5   0   2   69.13    1.09
   5   0   2   73.22    0.94
  -5   0   2   75.06    0.95
  -5   0   2   74.60    0.88
   6   0   2    1.26    0.42
  -6   0   2    1.07    0.29
   6   0   2    1.43    0.28
  -6   0   2    1.39    0.31
   7   0   2   23.61    0.59
  -7   0   2   23.98    0.61
  -7   0   2   23.24    0.66
   7   0   2   23.15    0.79
   8   0   2    0.75    0.27
  -8   0   2    0.64    0.35
   8   0   2    1.22    0.50
  -8   0   2    0.63    0.26
  -9   0   2   67.44    1.22
  -9   0   2   70.19    1.06
   9   0   2   67.67    1.34
   9   0   2   67.17    0.99
 -10   0   2   24.77    0.86
 -10   0   2   25.99    0.71
  10   0   2   25.95    0.67
  10   0   2   25.57    0.97
 -11   0   2  110.44    1.41
 -11   0   2  104.79    1.69
  11   0   2  106.28    1.30
 -12   0   2   32.05    0.83
 -12   0   2   30.34    1.04
  12   0   2   34.13    0.80
  13   0   2   33.05    0.81
 -13   0   2   32.83    1.13
 -13   0   2   33.12    0.87
 -14   0   2    2.24    0.41
  14   0   2    1.59    0.35
 -14   0   2    1.36    0.59
 -15   0   2   10.95    0.61
 -15   0   2   10.78    0.86
  15   0   2    9.14    0.52
 -16   0   2    0.42    0.72
 -16   0   2    0.09    0.42
  16   0   2    0.57    0.38
 -17   0   2   19.40    1.14
 -17   0   2   17.20    0.76
  17   0   2   17.99    0.70
  18   0   2    0.58    0.40
 -18   0   2    0.47    0.46
 -18   0   2    0.45    0.78
 -19   0   2    0.83    0.46
 -19   0   2    1.87    0.85
 -20   0   2   13.13    1.08
 -20   0   2   11.39    0.70
 -21   0   2    0.66    0.45
 -21   0   2    0.16    0.74
 -22   0   2    0.63    0.81
 -22   0   2    0.57    0.45
 -23   0   2    1.50    0.50
 -23   0   2    3.20    0.89
 -24   0   2   16.49    0.88
  24   0   2   17.01    1.33
 -24   0   2   17.52    1.28
 -24   0  -2   16.11    1.22
 -25   0   2   -0.26    0.85
  25   0   2    1.46    0.94
 -25   0  -2    0.97    0.86
 -25   0   2    0.27    0.50
 -26   0   2    1.50    0.91
 -26   0  -2    1.98    0.81
  26   0   2    2.28    0.91
  27   0   2    3.53    1.00
 -27   0   2    2.85    0.96
 -27   0  -2    3.34    0.96
  28   0   2    4.89    1.11
 -28   0  -2    6.84    1.06
 -28   0   2    6.14    1.10
 -29   0   2    2.69    1.07
 -29   0  -2    2.73    1.02
  29   0   2    3.38    1.12
 -30   0  -2   10.49    1.30
 -30   0   2   10.03    1.32
  30   0   2   13.13    1.46
 -31   0  -2   18.49    1.50
  31   0   2   17.91    1.60
 -31   0   2   18.71    1.57
  32   0   2    0.94    1.17
 -32   0   2    0.14    1.13
 -32   0  -2    1.40    1.12
 -33   0   2   11.81    1.45
   0   0   3    0.06    0.23
   0   0   3    0.03    0.22
   0   0   3    0.11    0.33
   0   0   3    0.10    0.17
   1   0   3    7.17    0.33
   1   0   3    7.01    0.30
  -1   0   3    7.41    0.47
  -1   0   3    7.06    0.35
  -1   0   3    7.07    0.30
  -1   0   3    7.22    0.26
   1   0   3    7.36    0.44
   2   0   3    7.07    0.28
  -2   0   3    7.33    0.27
   2   0   3    7.66    0.47
  -2   0   3    7.53    0.32
  -2   0   3    8.39    0.47
  -2   0   3    7.18    0.38
   2   0   3    6.92    0.37
   3   0   3    4.10    0.21
  -3   0   3    4.19    0.24
  -3   0   3    4.22    0.39
   3   0   3    3.88    0.39
   3   0   3    4.15    0.34
  -3   0   3    4.15    0.27
  -3   0   3    4.01    0.35
  -4   0   3   13.15    0.47
   4   0   3   12.72    0.26
   4   0   3   13.79    0.52
  -4   0   3   12.89    0.39
  -4   0   3   13.15    0.50
  -4   0   3   12.80    0.37
   4   0   3   13.13    0.53
   5   0   3    1.89    0.31
   5   0   3    1.65    0.36
  -5   0   3    1.88    0.23
  -5   0   3    1.99    0.33
  -6   0   3    0.34    0.23
  -6   0   3    0.24    0.25
   6   0   3    0.55    0.30
   6   0   3    0.18    0.41
  -7   0   3    0.29    0.31
  -7   0   3    0.60    0.26
   7   0   3    0.51    0.46
   7   0   3    0.20    0.29
  -8   0   3    4.25    0.36
   8   0   3    3.69    0.56
  -8   0   3    3.69    0.36
   8   0   3    3.89    0.38
   9   0   3    4.53    0.41
  -9   0   3    4.96    0.42
   9   0   3    4.21    0.61
  -9   0   3    4.04    0.39
 -10   0   3    7.63    0.53
  10   0   3    7.54    0.71
  10   0   3    6.81    0.47
 -10   0   3    8.27    0.52
 -11   0   3    0.58    0.42
 -11   0   3    0.70    0.33
  11   0   3    0.92    0.34
  11   0   3    1.07    0.64
 -12   0   3   12.33    0.71
  12   0   3   11.82    0.84
 -12   0   3   13.06    0.63
  12   0   3   11.61    0.59
 -13   0   3    2.64    0.45
 -13   0   3    2.39    0.55
  13   0   3    2.53    0.40
  13   0   3    3.26    0.76
 -14   0   3   32.93    1.15
 -14   0   3   34.78    1.00
  14   0   3   33.80    1.35
  14   0   3   32.43    0.93
  15   0   3    1.48    0.77
  15   0   3    1.28    0.44
 -15   0   3    0.80    0.43
 -15   0   3    0.48    0.65
 -16   0   3   56.99    1.59
  16   0   3   56.18    1.76
 -16   0   3   56.18    1.29
  16   0   3   51.73    1.19
  17   0   3   21.56    1.26
 -17   0   3   22.79    0.92
 -17   0   3   23.39    1.18
  17   0   3   22.15    0.84
 -18   0   3    0.74    0.51
  18   0   3    1.86    0.89
 -18   0   3    0.24    0.75
  18   0   3    1.02    0.46
 -19   0   3   19.22    1.18
  19   0   3   18.79    0.83
  19   0   3   20.02    1.31
 -19   0   3   18.81    0.88
 -20   0   3    1.05    0.49
 -20   0   3    0.32    0.76
  20   0   3    1.17    0.87
 -21   0   3    3.61    0.57
  21   0   3    3.97    0.90
 -21   0   3    3.81    0.84
  22   0   3    0.95    0.94
 -22   0   3    0.20    0.79
 -22   0   3    0.37    0.49
 -23   0   3    3.71    0.60
  23   0   3    3.87    1.02
 -23   0   3    4.38    0.92
 -24   0   3    3.53    0.92
 -24   0   3    2.74    0.59
  24   0   3    4.41    1.01
 -25   0   3    2.14    0.58
  25   0   3    2.39    1.02
 -25   0   3    2.07    0.86
 -26   0   3    0.58    0.89
  26   0   3    1.32    1.01
 -26   0   3    0.65    0.58
 -26   0  -3    1.20    0.85
  27   0   3    5.30    1.09
 -27   0   3    5.98    0.74
 -27   0  -3    5.76    0.98
 -27   0   3    5.37    1.09
 -28   0   3    7.58    1.15
 -28   0  -3    7.25    1.11
  28   0   3    8.85    1.31
 -29   0   3   -0.01    1.04
  29   0   3    0.86    1.19
 -29   0  -3    0.97    0.98
 -30   0  -3    5.43    1.07
 -30   0   3    5.61    1.15
  30   0   3    6.33    1.29
  31   0   3    2.10    1.15
 -31   0  -3    0.73    1.03
 -32   0   3    2.38    1.02
 -32   0  -3    2.78    1.12
  32   0   3    4.17    1.29
   0   0   4  206.27    1.54
   0   0   4  205.90    5.05
   0   0   4  210.79    5.97
   0   0   4  204.15    1.96
   1   0   4   39.41    0.91
  -1   0   4   38.55    0.58
   1   0   4   39.64    0.68
  -1   0   4   40.20    0.75
   1   0   4   38.18    0.70
  -1   0   4   38.97    0.68
  -1   0   4   40.76    0.93
   2   0   4    0.21    0.20
  -2   0   4   -0.17    0.19
   2   0   4    0.24    0.32
  -2   0   4    0.40    0.35
  -2   0   4    0.03    0.19
   2   0   4   -0.08    0.26
  -2   0   4    0.04    0.28
   3   0   4    6.83    0.40
   3   0   4    7.03    0.47
  -3   0   4    7.67    0.50
  -3   0   4    7.12    0.43
   3   0   4    6.66    0.30
  -3   0   4    6.95    0.34
  -3   0   4    7.12    0.30
  -4   0   4    2.43    0.35
  -4   0   4    2.32    0.23
   4   0   4    2.26    0.34
  -4   0   4    2.32    0.26
   4   0   4    2.42    0.21
  -4   0   4    2.95    0.41
   4   0   4    2.22    0.39
   5   0   4  205.37    2.03
  -5   0   4  204.70    1.56
  -5   0   4  203.87    1.86
   5   0   4  197.21    1.87
  -5   0   4  208.16    1.46
   5   0   4  204.42    1.11
   6   0   4  185.00    0.92
   6   0   4  181.38    1.92
  -6   0   4  184.76    1.83
  -6   0   4  185.85    1.47
   6   0   4  184.82    1.94
   7   0   4   88.36    1.45
  -7   0   4   86.51    1.09
  -7   0   4   89.59    1.34
   7   0   4   91.56    1.43
   8   0   4    1.11    0.37
  -8   0   4    1.14    0.38
   8   0   4    0.47    0.45
  -8   0   4    0.48    0.27
  -9   0   4   10.53    0.58
   9   0   4   11.23    0.77
  -9   0   4   10.54    0.51
   9   0   4   10.05    0.59
 -10   0   4   20.27    0.70
  10   0   4   17.01    0.91
 -10   0   4   18.09    0.73
  10   0   4   18.58    0.75
 -11   0   4   58.57    1.23
 -11   0   4   55.68    1.15
  11   0   4   55.77    1.46
  12   0   4   48.61    1.46
  12   0   4   50.45    1.19
 -12   0   4   50.54    1.19
 -12   0   4   48.89    1.15
  13   0   4    1.07    0.45
  13   0   4    0.81    0.71
 -13   0   4    0.76    0.47
 -13   0   4    0.56    0.42
 -14   0   4    4.36    0.60
  14   0   4    3.86    0.91
 -14   0   4    4.09    0.59
  14   0   4    4.68    0.56
 -15   0   4    4.45    0.57
  15   0   4    4.68    0.58
 -15   0   4    4.58    0.64
  15   0   4    5.30    0.98
  16   0   4   57.53    1.35
 -16   0   4   59.52    1.42
  16   0   4   59.19    1.88
 -16   0   4   55.46    1.51
 -17   0   4   98.35    1.81
 -17   0   4   98.79    2.03
  17   0   4  103.37    2.41
 -18   0   4    3.90    0.60
 -18   0   4    4.82    0.75
  18   0   4    4.23    0.59
  18   0   4    5.60    1.04
 -19   0   4    5.01    0.76
  19   0   4    4.81    0.97
  19   0   4    4.40    0.57
 -19   0   4    4.89    0.62
 -20   0   4   15.48    1.05
  20   0   4   16.15    1.30
 -20   0   4   16.44    0.90
 -21   0   4    1.68    0.55
  21   0   4    2.10    0.98
 -21   0   4    0.95    0.70
 -22   0   4   60.68    1.62
 -22   0   4   64.25    1.98
 -23   0   4    2.60    0.79
  23   0   4    3.55    1.08
 -23   0   4    3.61    0.66
  24   0   4    1.07    0.95
 -24   0   4    0.82    0.59
 -24   0   4    0.85    0.80
 -25   0   4    8.69    1.06
  25   0   4    8.64    1.20
 -25   0   4    7.91    0.81
 -26   0   4    0.70    0.87
 -26   0   4    0.80    0.62
  26   0   4    0.55    1.12
  27   0   4    0.77    1.05
 -27   0   4    0.31    0.87
 -27   0   4    0.56    0.65
 -28   0  -4   14.78    1.35
 -28   0   4   13.63    1.03
 -28   0   4   13.52    1.30
  29   0   4   34.46    1.96
 -29   0   4   32.43    1.82
 -29   0  -4   30.31    1.75
 -30   0   4    6.14    1.14
  30   0   4    7.29    1.41
 -30   0  -4    4.97    1.09
  31   0   4    0.86    1.23
 -31   0   4    0.35    0.99
 -31   0  -4    0.10    1.01
 -32   0   4    0.48    1.04
   0   0   5   -0.21    0.39
   0   0   5   -0.09    0.26
   0   0   5    0.03    0.24
   0   0   5    0.14    0.19
   1   0   5   56.94    1.21
   1   0   5   58.05    0.94
  -1   0   5   58.47    0.78
  -1   0   5   59.77    1.24
  -1   0   5   57.10    1.00
  -1   0   5   57.11    0.90
   1   0   5   55.80    0.92
  -2   0   5   17.06    0.53
  -2   0   5   16.49    0.60
   2   0   5   16.49    0.56
   2   0   5   15.98    0.51
   2   0   5   17.65    0.74
  -2   0   5   16.20    0.44
  -2   0   5   18.16    0.75
  -3   0   5   42.98    1.08
  -3   0   5   41.11    0.91
   3   0   5   42.06    1.07
   3   0   5   40.94    0.85
  -3   0   5   40.15    0.68
  -3   0   5   41.83    0.79
   3   0   5   39.88    0.73
  -4   0   5   14.67    0.52
  -4   0   5   14.75    0.45
  -4   0   5   13.46    0.61
   4   0   5   13.97    0.45
   4   0   5   16.79    0.75
   4   0   5   14.58    0.60
  -4   0   5   13.57    0.69
   5   0   5   37.43    0.92
   5   0   5   37.25    1.04
   5   0   5   35.54    0.62
  -5   0   5   38.39    0.71
  -5   0   5   37.73    0.78
  -5   0   5   38.28    0.94
   6   0   5    0.10    0.40
   6   0   5    0.53    0.41
  -6   0   5    0.68    0.38
  -6   0   5    0.34    0.24
   6   0   5    0.12    0.18
   7   0   5    0.72    0.44
  -7   0   5    0.33    0.38
   7   0   5    0.46    0.15
   7   0   5    0.27    0.43
  -7   0   5    0.46    0.25
   8   0   5    0.56    0.48
  -8   0   5    0.09    0.26
  -8   0   5    0.02    0.39
   8   0   5    0.43    0.42
  -9   0   5    0.19    0.30
   9   0   5    0.03    0.47
  -9   0   5    0.07    0.40
   9   0   5    0.66    0.42
 -10   0   5    4.68    0.50
  10   0   5    4.95    0.54
 -10   0   5    5.06    0.43
  10   0   5    5.14    0.65
 -11   0   5    2.25    0.49
 -11   0   5    2.86    0.42
  11   0   5    2.25    0.61
  11   0   5    2.90    0.53
  12   0   5    6.82    0.85
  12   0   5    8.46    0.68
 -12   0   5    7.49    0.64
 -12   0   5    7.76    0.56
  13   0   5    9.73    0.99
 -13   0   5    8.91    0.64
  13   0   5    8.44    0.69
 -13   0   5    8.86    0.67
  14   0   5   21.03    0.94
 -14   0   5   23.82    1.00
  14   0   5   22.73    1.25
 -14   0   5   21.54    0.90
  15   0   5   11.58    0.78
 -15   0   5   11.23    0.77
  15   0   5   13.27    1.15
 -15   0   5   12.04    0.79
 -16   0   5   42.51    1.31
  16   0   5   45.19    1.33
  16   0   5   46.68    1.73
 -16   0   5   47.46    1.37
 -17   0   5    3.63    0.60
  17   0   5    3.39    0.60
  17   0   5    2.80    0.93
 -17   0   5    2.62    0.63
 -18   0   5    0.30    0.60
  18   0   5    0.63    0.53
  18   0   5    0.44    0.92
 -18   0   5   -0.06    0.56
 -19   0   5   20.55    1.00
 -19   0   5   18.20    1.05
  19   0   5   17.55    1.35
  19   0   5   17.61    0.93
 -20   0   5    0.13    0.55
 -20   0   5    0.36    0.64
  20   0   5    0.20    0.89
  21   0   5   24.70    1.55
 -21   0   5   23.67    1.27
 -21   0   5   23.63    1.13
  22   0   5   23.38    1.58
 -22   0   5   21.55    1.25
 -22   0   5   22.47    1.13
  23   0   5    0.77    1.09
 -23   0   5    0.11    0.71
 -23   0   5    0.32    0.60
 -24   0   5    5.77    0.78
 -24   0   5    5.81    0.92
  24   0   5    8.06    1.24
 -25   0   5   12.61    0.99
  25   0   5   15.02    1.46
 -25   0   5   12.18    1.15
 -26   0   5    5.69    1.01
  26   0   5    5.23    1.23
 -26   0   5    4.86    0.79
 -27   0   5   22.42    1.50
 -27   0   5   21.90    1.25
 -28   0   5    6.32    1.11
 -28   0   5    6.75    0.90
  28   0   5    7.59    1.37
 -29   0   5    4.00    1.09
 -29   0   5    4.06    0.84
  29   0   5    3.17    1.30
 -30   0  -5    3.59    1.08
 -30   0   5    3.86    1.08
  30   0   5    3.81    1.28
 -31   0  -5    3.75    1.13
  31   0   5    1.63    1.27
 -31   0   5    1.03    1.05
 -32   0   5    0.85    1.06
   0   0   6    6.04    0.46
   0   0   6    6.43    0.59
   0   0   6    5.79    0.41
   0   0   6    6.41    0.35
   1   0   6   25.61    0.72
  -1   0   6   24.32    0.69
   1   0   6   24.77    0.72
  -1   0   6   25.60    0.78
   1   0   6   26.22    0.97
  -1   0   6   26.95    0.99
  -1   0   6   24.64    0.59
  -2   0   6   24.99    0.69
  -2   0   6   27.31    0.99
  -2   0   6   25.35    0.59
  -2   0   6   25.07    0.79
   2   0   6   25.30    0.71
   2   0   6   26.44    0.74
   2   0   6   27.13    0.98
  -3   0   6    0.89    0.41
  -3   0   6    0.24    0.24
   3   0   6    0.87    0.44
   3   0   6    0.72    0.32
  -3   0   6    0.68    0.51
  -3   0   6    0.32    0.31
   3   0   6    0.84    0.30
  -4   0   6   28.27    0.87
   4   0   6   28.47    0.83
   4   0   6   27.56    0.69
  -4   0   6   28.41    0.75
  -4   0   6   27.44    0.64
   4   0   6   28.61    1.03
  -5   0   6   34.77    0.82
  -5   0   6   35.51    1.00
   5   0   6   34.88    1.11
  -5   0   6   36.66    0.74
   5   0   6   35.26    0.73
   5   0   6   35.76    0.95
  -6   0   6  112.51    1.70
   6   0   6  117.34    1.70
  -6   0   6  118.30    1.46
  -6   0   6  116.75    1.29
   6   0   6  113.65    1.89
  -7   0   6   26.61    0.91
   7   0   6   24.62    0.54
   7   0   6   27.72    1.03
   7   0   6   25.69    0.91
  -7   0   6   26.45    0.69
   8   0   6    0.89    0.19
   8   0   6    1.01    0.49
  -8   0   6    1.08    0.43
  -8   0   6    1.01    0.30
   8   0   6    1.07    0.53
  -9   0   6    2.15    0.35
   9   0   6    1.87    0.57
  -9   0   6    1.47    0.45
   9   0   6    2.47    0.56
 -10   0   6    3.44    0.41
 -10   0   6    3.93    0.55
  10   0   6    3.55    0.66
  10   0   6    4.17    0.61
 -11   0   6   45.55    1.03
  11   0   6   46.78    1.42
  11   0   6   47.90    1.35
 -11   0   6   48.97    1.31
 -12   0   6   25.36    0.84
 -12   0   6   26.11    1.05
  12   0   6   26.34    1.19
  12   0   6   26.04    1.07
 -13   0   6    0.89    0.45
  13   0   6    1.03    0.59
  13   0   6    1.09    0.69
 -13   0   6    0.70    0.57
 -14   0   6    0.11    0.46
 -14   0   6   -0.08    0.55
  14   0   6    0.31    0.59
  14   0   6   -0.15    0.74
 -15   0   6   17.23    0.96
  15   0   6   17.05    0.96
  15   0   6   16.50    1.17
 -15   0   6   15.87    0.84
  16   0   6   24.19    1.09
  16   0   6   24.50    1.34
 -16   0   6   22.86    1.06
 -16   0   6   23.16    1.00
  17   0   6    4.01    0.92
 -17   0   6    3.18    0.58
 -17   0   6    4.01    0.63
  17   0   6    3.86    0.64
 -18   0   6   31.17    1.24
  18   0   6   31.60    1.58
 -18   0   6   31.50    1.22
  18   0   6   28.54    1.19
 -19   0   6   13.91    0.94
  19   0   6   14.58    0.94
 -19   0   6   15.21    0.94
  19   0   6   14.77    1.26
 -20   0   6    5.04    0.74
  20   0   6    4.35    1.08
 -20   0   6    4.51    0.74
 -21   0   6    0.18    0.59
  21   0   6   -0.63    1.01
 -21   0   6    0.24    0.66
 -22   0   6    3.07    0.77
  22   0   6    3.45    1.15
 -22   0   6    3.35    0.70
  23   0   6    5.29    1.16
 -23   0   6    3.36    0.79
 -23   0   6    5.71    0.80
 -24   0   6    3.39    0.84
 -24   0   6    3.09    0.71
  24   0   6    3.80    1.10
  25   0   6   11.91    1.41
 -25   0   6   13.29    1.20
 -25   0   6   12.02    1.02
  26   0   6    0.14    1.18
 -26   0   6    0.40    0.74
 -26   0   6    0.11    0.86
  27   0   6   -0.63    1.20
 -27   0   6    0.33    0.92
 -27   0   6   -0.25    0.77
 -28   0   6   26.03    1.42
  28   0   6   26.88    1.90
 -28   0   6   22.23    1.55
 -29   0   6   10.03    1.09
  29   0   6   10.64    1.54
 -29   0   6   10.80    1.26
 -30   0   6    0.13    0.86
 -30   0   6    0.56    1.04
  30   0   6   -0.01    1.34
 -31   0   6    0.32    0.87
 -31   0   6    0.46    1.08
   0   0   7    0.13    0.31
   0   0   7    0.17    0.39
   0   0   7    0.82    0.57
  -1   0   7    3.02    0.33
  -1   0   7    2.78    0.59
  -1   0   7    2.80    0.46
   1   0   7    3.17    0.62
   1   0   7    3.25    0.41
  -1   0   7    2.74    0.40
   1   0   7    2.83    0.44
   2   0   7    0.16    0.57
  -2   0   7    0.35    0.58
  -2   0   7    0.08    0.26
   2   0   7    0.17    0.35
   2   0   7    0.59    0.38
  -2   0   7    0.29    0.42
  -2   0   7    0.29    0.32
  -3   0   7    9.94    0.45
   3   0   7    9.71    0.57
  -3   0   7   11.15    0.67
  -3   0   7   10.14    0.81
   3   0   7   10.32    0.77
   3   0   7   10.21    0.56
  -3   0   7   10.28    0.55
   4   0   7    9.31    0.79
   4   0   7    9.11    0.53
   4   0   7    9.24    0.60
  -4   0   7    8.31    0.51
  -4   0   7    9.51    0.67
  -4   0   7    9.30    0.45
   5   0   7    1.80    0.55
  -5   0   7    1.96    0.37
  -5   0   7    1.65    0.47
   5   0   7    1.22    0.36
   5   0   7    1.90    0.44
  -5   0   7    1.69    0.31
   6   0   7   27.70    1.10
   6   0   7   28.18    0.73
  -6   0   7   28.05    0.72
  -6   0   7   28.42    1.01
  -6   0   7   27.40    0.82
   6   0   7   27.90    0.95
   7   0   7    0.11    0.30
   7   0   7    0.38    0.53
  -7   0   7    0.56    0.50
   7   0   7    0.06    0.52
  -7   0   7    0.02    0.38
  -7   0   7   -0.12    0.29
   8   0   7   59.37    1.42
   8   0   7   56.01    0.83
  -8   0   7   57.64    1.05
  -8   0   7   58.70    1.41
   8   0   7   55.08    1.50
  -9   0   7    2.56    0.56
   9   0   7    3.68    0.69
  -9   0   7    3.14    0.40
   9   0   7    2.86    0.63
 -10   0   7   78.15    1.68
 -10   0   7   76.46    1.27
  10   0   7   75.72    1.76
  10   0   7   78.80    1.75
 -11   0   7    0.49    0.36
  11   0   7    0.51    0.67
 -11   0   7    1.12    0.58
  11   0   7    1.34    0.65
 -12   0   7   15.81    0.93
  12   0   7   15.23    0.99
  12   0   7   16.82    0.98
 -12   0   7   15.01    0.69
 -13   0   7    3.62    0.64
  13   0   7    4.63    0.78
  13   0   7    3.30    0.69
 -13   0   7    3.71    0.48
 -14   0   7    1.76    0.57
  14   0   7    2.07    0.71
 -14   0   7    1.76    0.46
  14   0   7    1.61    0.64
  15   0   7    2.16    0.72
 -15   0   7    1.15    0.58
 -15   0   7    0.97    0.46
  15   0   7    1.75    0.62
 -16   0   7    0.74    0.48
 -16   0   7    0.79    0.63
  16   0   7    1.14    0.59
  16   0   7    1.61    0.80
 -17   0   7    0.94    0.51
  17   0   7    1.15    0.78
 -17   0   7    0.88    0.59
  17   0   7    0.82    0.58
  18   0   7    0.48    0.80
 -18   0   7    0.09    0.51
  18   0   7    0.43    0.60
 -18   0   7    0.17    0.59
 -19   0   7    5.82    0.71
  19   0   7    6.58    1.01
 -19   0   7    5.24    0.77
 -20   0   7    1.76    0.65
 -20   0   7    1.62    0.62
  20   0   7    2.23    0.92
 -21   0   7    0.84    0.67
  21   0   7    0.97    0.93
 -21   0   7    0.16    0.63
  22   0   7   14.23    1.30
 -22   0   7   12.31    1.01
 -22   0   7   13.82    1.03
  23   0   7    1.34    1.00
 -23   0   7    1.11    0.74
 -23   0   7    0.61    0.72
 -24   0   7   -0.12    0.75
  24   0   7    0.28    1.01
 -24   0   7   -0.10    0.72
 -25   0   7    1.60    0.84
  25   0   7    1.69    1.04
 -25   0   7    2.25    0.83
 -26   0   7    2.38    0.90
  26   0   7    3.07    1.18
 -26   0   7    2.61    0.82
 -27   0   7    2.18    0.92
  27   0   7    1.69    1.17
 -27   0   7    1.48    0.79
 -28   0   7    2.87    0.90
 -28   0   7    3.43    1.01
  28   0   7    5.02    1.25
 -29   0   7    0.05    1.03
 -29   0   7    0.45    0.84
  29   0   7    0.55    1.14
 -30   0   7   10.32    1.30
 -30   0   7   10.90    1.18
 -31   0   7    0.89    0.99
 -31   0   7    1.52    0.95
   0   0   8   14.21    0.98
   0   0   8   15.34    0.70
   0   0   8   13.93    0.75
  -1   0   8   24.89    0.95
  -1   0   8   23.99    0.69
   1   0   8   24.26    0.83
  -1   0   8   25.57    1.19
  -1   0   8   26.07    0.85
   1   0   8   24.43    1.17
   1   0   8   21.89    0.87
   2   0   8    2.28    0.71
  -2   0   8    1.84    0.52
  -2   0   8    2.04    0.43
   2   0   8    2.37    0.46
  -2   0   8    2.03    0.33
   2   0   8    1.79    0.47
  -3   0   8    4.27    0.59
  -3   0   8    3.06    0.44
   3   0   8    3.18    0.49
   3   0   8    3.58    0.53
  -3   0   8    2.96    0.36
   3   0   8    3.29    0.69
   4   0   8   10.78    0.68
  -4   0   8    9.24    0.50
  -4   0   8    8.53    0.72
   4   0   8    8.72    0.61
   4   0   8    9.32    0.88
  -4   0   8    9.50    0.59
   5   0   8    2.35    0.46
  -5   0   8    1.44    0.42
   5   0   8    2.15    0.52
   5   0   8    2.17    0.64
  -5   0   8    2.72    0.58
  -5   0   8    2.09    0.34
   6   0   8   72.43    1.51
  -6   0   8   75.90    1.19
  -6   0   8   74.26    1.62
  -6   0   8   76.73    1.40
   6   0   8   75.11    1.85
   6   0   8   73.05    1.24
   7   0   8    9.98    0.72
  -7   0   8   10.01    0.62
  -7   0   8    9.16    0.53
  -7   0   8    9.94    0.78
   7   0   8    9.85    0.89
   7   0   8    8.68    0.53
   8   0   8    0.96    0.65
   8   0   8    0.64    0.57
  -8   0   8    0.62    0.55
  -8   0   8    0.52    0.33
  -9   0   8    1.56    0.59
   9   0   8    2.64    0.66
   9   0   8    1.67    0.63
  -9   0   8    1.76    0.38
 -10   0   8    0.40    0.61
  10   0   8    0.98    0.65
  10   0   8    0.58    0.69
 -10   0   8    0.45    0.35
 -11   0   8   21.23    0.77
  11   0   8   22.70    1.16
 -11   0   8   22.43    1.09
  11   0   8   20.75    1.08
 -12   0   8    3.53    0.44
  12   0   8    3.46    0.71
  12   0   8    4.06    0.73
 -12   0   8    4.39    0.70
  13   0   8    3.44    0.71
 -13   0   8    2.80    0.44
 -13   0   8    3.51    0.68
  13   0   8    3.18    0.67
  14   0   8    0.77    0.65
 -14   0   8    0.24    0.39
  14   0   8    0.73    0.61
 -14   0   8    0.56    0.60
  15   0   8    0.78    0.70
 -15   0   8    0.73    0.43
  15   0   8    0.79    0.64
 -15   0   8    0.79    0.64
 -16   0   8   12.01    0.93
 -16   0   8   10.99    0.71
  16   0   8   12.41    1.08
  16   0   8   12.18    0.99
 -17   0   8   17.05    1.06
  17   0   8   17.10    1.22
 -17   0   8   18.76    0.91
  17   0   8   16.84    1.10
 -18   0   8   31.93    1.18
 -18   0   8   30.90    1.34
  18   0   8   31.08    1.57
 -19   0   8    3.47    0.76
 -19   0   8    3.27    0.61
  19   0   8    4.36    0.93
 -20   0   8   -0.21    0.68
  20   0   8    0.18    0.89
 -20   0   8   -0.03    0.59
  21   0   8    1.45    0.90
 -21   0   8    0.64    0.67
 -21   0   8    0.21    0.61
 -22   0   8    0.65    0.63
 -22   0   8    0.67    0.76
  22   0   8    0.40    1.03
  23   0   8    9.06    1.23
 -23   0   8    7.80    0.89
 -23   0   8    7.80    0.94
  24   0   8    1.57    1.09
 -24   0   8    0.89    0.74
 -24   0   8    1.23    0.81
 -25   0   8    1.81    0.80
  25   0   8    3.93    1.13
 -25   0   8    2.41    0.83
 -26   0   8    0.19    0.85
 -26   0   8    0.43    0.84
  26   0   8    1.82    1.13
 -27   0   8    1.62    0.84
 -27   0   8    1.96    0.90
  27   0   8    1.03    1.18
  28   0   8   12.25    1.53
 -28   0   8   11.73    1.21
 -28   0   8   10.95    1.21
 -29   0   8    0.79    0.91
 -29   0   8    1.29    0.87
   0   0   9   -0.02    0.46
   0   0   9   -0.33    0.57
  -1   0   9   13.26    0.72
  -1   0   9   13.48    0.84
   1   0   9   13.59    0.73
   1   0   9   13.00    0.82
   1   0   9   14.77    1.05
   2   0   9    2.89    0.59
  -2   0   9    3.17    0.49
  -2   0   9    2.69    0.63
   2   0   9    2.22    0.48
  -2   0   9    2.43    0.39
   2   0   9    2.90    0.81
   3   0   9   10.71    0.74
   3   0   9   11.73    0.72
   3   0   9   11.56    1.00
  -3   0   9   13.15    0.72
  -3   0   9   12.24    0.57
  -3   0   9   10.75    0.81
   4   0   9    2.90    0.77
   4   0   9    2.39    0.52
  -4   0   9    2.82    0.65
  -4   0   9    3.06    0.40
   4   0   9    2.87    0.55
  -4   0   9    3.02    0.51
   5   0   9   48.47    1.31
  -5   0   9   52.23    1.24
  -5   0   9   46.11    1.40
   5   0   9   46.61    1.17
  -5   0   9   49.96    1.02
   5   0   9   49.48    1.65
  -6   0   9    2.64    0.48
  -6   0   9    2.57    0.39
   6   0   9    3.05    0.56
   6   0   9    3.48    0.80
  -6   0   9    2.99    0.65
  -7   0   9   13.67    0.90
  -7   0   9   13.20    0.62
   7   0   9   15.05    0.88
  -7   0   9   14.40    0.76
   7   0   9   15.72    1.09
  -8   0   9    8.35    0.82
   8   0   9    8.35    0.91
   8   0   9    8.40    0.75
  -8   0   9    8.03    0.52
  -9   0   9    0.22    0.34
  -9   0   9    0.66    0.56
   9   0   9    0.95    0.66
   9   0   9    0.68    0.57
  10   0   9    2.91    0.64
 -10   0   9    2.69    0.41
  10   0   9    1.81    0.62
 -10   0   9    2.16    0.61
  11   0   9    2.75    0.69
  11   0   9    3.24    0.63
 -11   0   9    1.90    0.66
 -11   0   9    2.33    0.39
  12   0   9    4.41    0.74
  12   0   9    3.97    0.72
 -12   0   9    3.91    0.71
 -12   0   9    3.50    0.45
  13   0   9   11.71    1.01
 -13   0   9    9.30    0.87
  13   0   9    9.23    0.92
 -13   0   9    9.99    0.62
  14   0   9   -0.13    0.64
 -14   0   9   -0.16    0.39
 -14   0   9   -0.07    0.60
  14   0   9    0.08    0.74
 -15   0   9   25.13    0.95
  15   0   9   26.13    1.33
  15   0   9   25.15    1.34
 -15   0   9   23.67    1.21
  16   0   9    1.15    0.74
 -16   0   9    0.61    0.45
 -16   0   9    0.63    0.62
 -17   0   9    2.52    0.53
  17   0   9    2.99    0.87
 -17   0   9    2.43    0.70
  18   0   9    0.28    0.83
 -18   0   9    0.15    0.46
 -18   0   9    0.44    0.71
 -19   0   9    6.60    0.70
 -19   0   9    5.31    0.86
  19   0   9    6.81    1.03
 -20   0   9    2.64    0.62
  20   0   9    3.39    0.98
 -20   0   9    3.44    0.79
  21   0   9    9.18    1.20
 -21   0   9    7.40    0.79
 -21   0   9    8.39    0.98
 -22   0   9    8.49    0.86
  22   0   9    9.94    1.30
 -22   0   9   10.82    1.11
  23   0   9    6.87    1.20
 -23   0   9    8.02    1.06
 -23   0   9    7.89    0.92
  24   0   9    1.79    1.12
 -24   0   9    0.80    0.80
 -24   0   9    0.90    0.70
  25   0   9    8.77    1.33
 -25   0   9    6.93    1.07
 -26   0   9    0.28    0.88
  26   0   9    0.39    1.20
  27   0   9   29.69    1.99
 -27   0   9   26.44    1.58
   0   0  10    0.40    0.59
   0   0  10    0.77    0.44
  -1   0  10   25.70    1.11
   1   0  10   27.10    1.11
   1   0  10   28.27    1.02
  -1   0  10   27.16    0.98
   2   0  10    0.00    0.56
  -2   0  10   -0.05    0.43
   2   0  10    0.00    0.45
  -2   0  10    0.48    0.58
  -3   0  10    3.70    0.52
   3   0  10    3.71    0.58
  -3   0  10    4.19    0.67
  -3   0  10    4.56    0.45
   3   0  10    4.14    0.54
  -4   0  10   21.01    0.91
  -4   0  10   18.57    1.03
   4   0  10   20.71    0.95
  -4   0  10   21.25    0.74
   4   0  10   18.60    0.90
   5   0  10    0.78    0.70
  -5   0  10    0.28    0.49
  -5   0  10    0.28    0.35
   5   0  10    0.47    0.48
  -5   0  10    0.02    0.61
  -6   0  10  143.35    2.49
   6   0  10  148.00    2.88
  -6   0  10  150.83    2.16
  -6   0  10  150.02    1.80
   6   0  10  141.96    2.27
  -7   0  10    0.75    0.57
  -7   0  10    0.32    0.36
  -7   0  10    0.18    0.46
   7   0  10   -0.02    0.52
   7   0  10    0.46    0.72
  -8   0  10    2.01    0.65
  -8   0  10    1.88    0.40
   8   0  10    2.45    0.75
   8   0  10    1.89    0.57
  -9   0  10    1.63    0.40
   9   0  10    1.93    0.77
   9   0  10    1.78    0.57
  -9   0  10    1.11    0.65
 -10   0  10    0.11    0.38
  10   0  10    0.65    0.72
  10   0  10    0.46    0.59
 -10   0  10    0.09    0.62
 -11   0  10   56.33    1.24
  11   0  10   54.21    1.64
 -11   0  10   57.51    1.74
 -12   0  10    0.21    0.70
 -12   0  10    0.57    0.38
  12   0  10    0.60    0.63
 -13   0  10   -0.11    0.65
  13   0  10    0.40    0.70
 -13   0  10    0.30    0.38
 -14   0  10    1.02    0.64
  14   0  10    0.61    0.67
 -14   0  10    0.72    0.41
 -15   0  10    0.05    0.40
  15   0  10    0.29    0.71
 -15   0  10    0.25    0.64
 -16   0  10   32.27    1.09
  16   0  10   37.89    1.66
 -16   0  10   35.63    1.51
  17   0  10    0.65    0.76
 -17   0  10    0.59    0.68
 -17   0  10    0.46    0.47
  18   0  10   40.65    1.83
 -18   0  10   42.40    1.69
  19   0  10    1.23    0.92
 -19   0  10    0.26    0.73
  20   0  10    3.07    0.99
 -20   0  10    3.36    0.83
 -21   0  10    6.21    1.00
  21   0  10    5.41    1.14
 -22   0  10    5.29    1.01
  22   0  10    4.59    1.17
  23   0  10    8.34    1.28
 -23   0  10    7.93    1.08
 -24   0  10    2.97    0.91
  24   0  10    3.61    1.16
 -25   0  10    0.52    0.96
  25   0  10    0.35    1.18
   0   0  11   -0.03    0.48
   0   0  11   -0.11    0.61
   1   0  11    4.21    0.67
   1   0  11    3.07    0.57
  -1   0  11    2.80    0.68
  -1   0  11    3.22    0.57
  -2   0  11   -0.18    0.48
   2   0  11    0.04    0.59
  -2   0  11    0.34    0.65
   2   0  11    0.22    0.49
  -3   0  11    0.94    0.52
   3   0  11    0.99    0.50
  -3   0  11    0.71    0.64
   4   0  11    9.27    0.76
  -4   0  11   10.01    0.73
  -4   0  11    9.03    0.87
  -4   0  11    9.11    0.58
   5   0  11    9.37    0.78
  -5   0  11    9.21    0.59
  -5   0  11    9.06    0.88
  -5   0  11    8.94    0.71
   6   0  11    4.94    0.67
  -6   0  11    5.72    0.62
  -6   0  11    4.70    0.79
  -6   0  11    4.99    0.50
   7   0  11    2.77    0.63
  -7   0  11    2.53    0.53
  -7   0  11    2.69    0.45
  -7   0  11    1.77    0.69
   8   0  11    1.16    0.56
  -8   0  11    1.76    0.42
  -8   0  11    1.30    0.66
   9   0  11    1.60    0.60
  -9   0  11    1.74    0.71
  10   0  11    5.40    0.73
 -10   0  11    5.43    0.82
 -11   0  11    0.82    0.68
  11   0  11    0.58    0.65
  12   0  11   12.06    0.99
 -12   0  11   13.64    1.06
  13   0  11    7.97    0.91
 -13   0  11    7.53    0.94
 -14   0  11    4.64    0.84
  14   0  11    4.86    0.86
  15   0  11    1.34    0.76
 -15   0  11    1.54    0.72
 -16   0  11   15.95    1.18
  16   0  11   14.97    1.20
  17   0  11   13.38    1.23
 -17   0  11   14.72    1.20
 -18   0  11    5.28    0.97
  18   0  11    5.54    1.04
 -19   0  11    0.68    0.85
  19   0  11    0.97    0.90
 -20   0  11    0.36    0.88
  20   0  11   -0.29    0.98
  21   0  11    1.95    1.00
 -21   0  11    2.04    0.88
 -22   0  11    2.23    0.89
  22   0  11    1.27    1.02
 -23   0  11    0.36    0.90
  23   0  11    0.42    1.13
   0   0  12    0.66    0.68
   0   0  12    0.88    0.52
  -1   0  12    2.70    0.73
  -1   0  12    4.11    0.61
   1   0  12    3.37    0.61
   2   0  12    2.69    0.60
  -2   0  12    2.78    0.57
  -2   0  12    1.84    0.69
   3   0  12    0.39    0.56
  -3   0  12    1.09    0.69
  -3   0  12    1.06    0.56
  -4   0  12    0.76    0.53
   4   0  12    0.58    0.54
  -4   0  12    0.29    0.69
   5   0  12    4.08    0.66
  -5   0  12    2.98    0.73
  -5   0  12    3.46    0.59
   6   0  12   13.91    0.92
  -6   0  12   13.37    1.05
  -6   0  12   14.03    0.88
   7   0  12    3.12    0.63
  -7   0  12    2.76    0.75
  -7   0  12    3.20    0.61
  -8   0  12    0.69    0.69
   8   0  12    0.13    0.61
   9   0  12    5.84    0.77
  -9   0  12    5.83    0.86
 -10   0  12    0.12    0.77
  10   0  12    0.13    0.63
  11   0  12   16.47    1.12
 -11   0  12   15.45    1.16
  12   0  12    0.41    0.72
 -12   0  12    0.94    0.77
 -13   0  12    0.38    0.77
  13   0  12   -0.25    0.72
  14   0  12    0.46    0.74
 -14   0  12    0.47    0.82
  15   0  12    0.44    0.80
 -15   0  12    0.11    0.85
 -16   0  12    5.33    0.97
  16   0  12    3.67    0.96
  17   0  12    0.43    0.88
 -17   0  12    0.74    0.83
  18   0  12   -0.26    0.91
 -18   0  12    0.54    0.91
 -19   0  12   -0.04    0.96
  19   0  12    0.31    0.95
  20   0  12    3.12    1.08
 -20   0  12    4.74    1.06
  21   0  12    0.12    1.06
 -21   0  12    1.18    0.97
   0   0  13   -0.41    0.59
   1   0  13    2.42    0.64
  -1   0  13    1.82    0.61
   2   0  13    1.92    0.62
  -2   0  13    1.46    0.60
  -2   0  13    1.79    0.78
  -3   0  13   -0.02    0.58
   3   0  13    0.20    0.59
  -3   0  13    0.25    0.77
  -4   0  13    2.24    0.62
   4   0  13    0.61    0.60
  -4   0  13    0.73    0.78
   5   0  13    1.87    0.65
  -5   0  13    2.09    0.61
  -5   0  13    1.50    0.79
  -6   0  13    0.47    0.82
  -6   0  13    1.04    0.57
   6   0  13    1.72    0.62
  -7   0  13    2.47    0.84
   7   0  13    3.02    0.71
   8   0  13    0.09    0.63
  -8   0  13    0.24    0.83
   9   0  13   -0.19    0.67
  -9   0  13    0.37    0.84
 -10   0  13    2.04    0.89
  10   0  13    2.37    0.72
 -11   0  13    1.93    0.89
  11   0  13    2.20    0.77
 -12   0  13    1.77    0.85
  12   0  13    1.14    0.76
  13   0  13    0.33    0.77
 -13   0  13    0.00    0.93
 -14   0  13    0.10    0.88
  14   0  13    0.45    0.79
  15   0  13    5.31    0.99
 -15   0  13    7.24    1.11
  16   0  13    0.15    0.87
 -16   0  13    0.35    1.01
 -17   0  13    3.79    0.98
  17   0  13    3.08    1.01
  18   0  13   -0.23    0.98
 -18   0  13    0.65    0.90
  19   0  13    2.84    1.01
   0   0  14   72.91    1.95
  -1   0  14   32.21    1.37
   1   0  14   29.26    1.32
   2   0  14    2.02    0.67
  -2   0  14    2.53    0.68
  -3   0  14    0.74    0.64
   3   0  14    0.74    0.69
   4   0  14    0.30    0.69
  -4   0  14    0.31    0.90
  -4   0  14    0.59    0.65
   5   0  14    1.39    0.72
  -5   0  14    1.87    0.93
  -5   0  14    1.59    0.69
   6   0  14    1.21    0.68
  -6   0  14    1.38    0.68
  -6   0  14    0.11    0.90
   7   0  14    3.33    0.79
  -7   0  14    2.30    0.95
  -8   0  14    1.42    0.91
   8   0  14    2.24    0.77
   9   0  14   -0.11    0.73
  -9   0  14    0.28    0.94
 -10   0  14    9.54    1.20
  10   0  14    8.87    0.99
  11   0  14   52.64    1.92
 -11   0  14   55.21    2.20
 -12   0  14   14.50    1.34
  12   0  14   14.88    1.24
 -13   0  14    5.51    1.09
  13   0  14    4.84    0.94
  14   0  14    0.45    0.83
 -14   0  14    0.98    0.96
 -15   0  14    0.38    1.06
  15   0  14    0.11    0.91
  16   0  14    2.82    0.94
   0   0  15   -0.03    0.73
  -1   0  15    0.31    0.70
   1   0  15    0.35    0.70
   2   0  15    0.52    0.71
  -2   0  15    0.73    0.70
  -3   0  15    0.45    0.67
   3   0  15    0.19    0.70
   4   0  15    6.93    0.91
  -4   0  15    8.55    0.90
   5   0  15    0.59    0.72
  -5   0  15   -0.14    0.72
  -6   0  15   -0.07    1.03
   6   0  15    0.74    0.71
  -7   0  15   -0.21    1.02
   7   0  15    0.47    0.75
   8   0  15    2.91    0.82
  -8   0  15    3.06    1.11
   9   0  15    0.37    0.78
  -9   0  15    0.55    1.08
 -10   0  15    3.31    1.12
  10   0  15    3.36    0.86
  11   0  15    7.44    1.01
 -11   0  15    8.01    1.26
 -12   0  15    0.39    1.05
   0   0  16   18.23    1.25
  -1   0  16    4.26    0.84
   1   0  16    4.62    0.86
  -2   0  16   -0.03    0.78
   2   0  16    0.31    0.76
  -3   0  16    0.88    0.75
   3   0  16    0.55    0.79
   0  -1   0    1.21    0.16
  -1  -1   0    0.18    0.16
   1   1   0    0.05    0.11
   1  -1   0    0.07    0.14
   2   1   0    4.53    0.27
  -2  -1   0    4.86    0.26
   2  -1   0    4.98    0.33
  -3  -1   0   -0.03    0.23
   3   1   0    0.30    0.30
   3  -1   0   -0.04    0.24
   4   1   0    2.38    0.34
   4  -1   0    2.08    0.28
  -4  -1   0    2.48    0.30
  -4   1   0    2.03    0.30
  -5   1   0    0.45    0.26
  -5  -1   0    0.54    0.30
   5  -1   0   -0.06    0.21
  -6   1   0    1.47    0.26
   6  -1   0    1.12    0.22
  -6  -1   0    1.35    0.36
  -7   1   0    0.09    0.22
   7  -1   0    0.05    0.20
  -7  -1   0    0.00    0.33
  -8   1   0   22.95    0.53
  -8  -1   0   24.03    0.80
   8  -1   0   23.86    0.52
  -9  -1   0    0.40    0.45
  -9   1   0    0.08    0.22
   9  -1   0    0.01    0.19
 -10   1   0   25.47    0.59
 -10  -1   0   23.33    0.90
  10  -1   0   23.58    0.53
 -11  -1   0    0.31    0.50
  11  -1   0    0.08    0.20
 -11   1   0    0.21    0.24
 -12   1   0    1.56    0.28
  12  -1   0    1.34    0.23
 -12  -1   0    1.91    0.53
  13  -1   0   -0.07    0.21
 -13   1   0    0.10    0.25
 -13  -1   0    0.25    0.58
 -14   1   0    5.24    0.40
 -14  -1   0    6.16    0.76
  14  -1   0    5.64    0.33
  15  -1   0    0.09    0.23
 -15  -1   0    0.60    0.69
 -15   1   0    0.03    0.30
  16  -1   0    1.69    0.28
 -16   1   0    2.14    0.37
  17  -1   0    0.11    0.26
 -17  -1   0    0.37    0.77
 -17   1   0   -0.18    0.35
 -18  -1   0    1.94    0.77
 -18   1   0    1.91    0.38
  18  -1   0    1.90    0.31
 -19  -1   0    0.15    0.82
 -19   1   0    0.09    0.39
 -20   1   0   12.00    0.62
 -20  -1   0   11.67    1.00
 -21   1   0    0.45    0.37
 -21  -1   0    0.73    0.77
 -22  -1   0   48.25    1.79
 -23  -1   0    0.70    0.78
 -24  -1   0    4.86    0.96
 -24   1   0    5.65    0.96
 -25  -1   0    0.93    0.88
 -25   1   0    1.19    0.86
 -26  -1   0    1.76    0.88
 -26   1   0    3.28    0.95
 -27   1   0    0.65    0.90
 -27  -1   0   -0.09    0.89
 -28  -1   0    1.84    0.90
 -28   1   0    2.20    0.96
 -29   1   0    0.06    1.04
 -29  -1   0    0.30    1.01
 -30  -1   0    2.18    1.01
 -30   1   0    1.98    1.03
  30   1   0    3.31    1.15
  31   1   0    1.38    1.11
 -31   1   0    0.78    1.02
 -31  -1   0    0.29    1.04
 -32   1   0    0.95    1.11
 -32  -1   0    0.45    1.10
  32   1   0    1.45    1.13
 -33   1   0    0.55    1.11
   0  -1  -1   38.91    0.35
   0   1   1   38.82    0.45
   0  -1   1   36.29    0.61
   0  -1   1   36.27    0.53
   1  -1   1   52.22    0.72
  -1   1   1   53.29    0.53
   1  -1   1   50.97    0.61
   1   1   1   52.64    0.55
  -1  -1  -1   50.97    0.47
   1  -1  -1   52.40    0.39
  -1  -1   1   51.47    0.63
  -1  -1   1   50.61    0.68
  -2   1   1    9.10    0.47
  -2  -1  -1    8.71    0.29
  -2  -1   1    8.76    0.34
   2  -1   1    8.34    0.31
  -2  -1   1    8.80    0.36
   2  -1   1    8.53    0.36
   2   1   1    9.71    0.34
  -2   1   1    8.70    0.27
  -3   1   1    1.48    0.36
  -3  -1  -1    1.22    0.28
  -3  -1   1    1.29    0.24
  -3  -1   1    1.44    0.25
   3  -1   1    1.28    0.27
   3   1   1    1.75    0.31
  -4  -1   1    1.25    0.21
  -4  -1   1    1.20    0.25
  -4  -1  -1    1.53    0.32
   4   1   1    1.07    0.35
  -4   1   1    1.44    0.32
   4  -1   1    1.40    0.26
  -5  -1   1    1.47    0.28
   5   1   1    1.27    0.37
   5  -1   1    1.73    0.26
  -5   1   1    1.27    0.30
  -5  -1   1    1.67    0.21
  -5  -1  -1    1.46    0.36
   6  -1   1  379.75    7.75
  -6   1  -1  354.55    6.65
  -6  -1   1  371.79    9.08
   6  -1  -1  352.90    6.87
  -6  -1   1  357.67    6.35
  -6   1   1  360.00    7.90
  -7  -1  -1   21.48    0.74
   7  -1   1   23.06    0.54
   7   1   1   23.36    0.73
   7  -1  -1   20.96    0.47
  -7   1   1   22.26    0.56
  -7  -1   1   21.89    0.68
  -7  -1   1   22.01    0.44
  -7   1  -1   22.02    0.47
   8   1   1    3.45    0.48
  -8   1  -1    2.96    0.25
  -8   1   1    3.62    0.31
   8  -1   1    3.77    0.29
   8  -1  -1    3.48    0.26
  -8  -1   1    3.38    0.39
  -8  -1  -1    3.24    0.46
   9   1   1   12.11    0.66
  -9  -1   1   13.19    0.65
   9  -1  -1   12.51    0.39
  -9  -1  -1   12.36    0.69
   9  -1   1   12.72    0.44
  -9   1   1   12.23    0.47
  -9   1  -1   12.29    0.38
  10  -1   1    2.75    0.29
 -10   1  -1    2.41    0.24
  10   1   1    2.90    0.54
  10  -1  -1    2.30    0.25
 -10  -1  -1    2.58    0.50
 -10   1   1    2.86    0.33
 -10  -1   1    2.58    0.49
  11  -1  -1  129.46    1.12
 -11   1   1  133.60    1.44
 -11  -1  -1  134.27    1.99
  11  -1   1  129.70    1.29
 -11   1  -1  134.48    1.18
 -11  -1   1  126.22    1.92
 -12   1   1    0.98    0.31
  12  -1   1    1.34    0.24
 -12  -1  -1    1.41    0.56
 -12   1  -1    0.70    0.23
 -12  -1   1    1.01    0.52
  12  -1  -1    1.28    0.21
 -13   1   1    1.44    0.33
  13  -1  -1    1.18    0.22
 -13  -1  -1    1.70    0.60
 -13   1  -1    0.98    0.24
 -13  -1   1    1.47    0.55
  13  -1   1    1.21    0.26
 -14  -1   1   16.62    0.34
 -14  -1   1   19.35    1.00
 -14   1   1   17.94    0.66
  14  -1  -1   16.93    0.47
 -14   1  -1   17.57    0.53
  14  -1   1   17.79    0.56
 -14  -1  -1   18.61    0.97
 -15  -1  -1   21.71    1.09
 -15   1   1   20.02    0.71
  15  -1  -1   20.69    0.52
  15  -1   1   21.15    0.62
 -15   1  -1   21.18    0.60
 -15  -1   1   21.05    1.10
  16  -1  -1  104.76    1.08
  16  -1   1  103.19    1.30
 -16  -1  -1  113.62    2.19
 -16  -1   1  109.02    2.19
 -16   1   1  107.99    1.53
  17  -1   1   10.14    0.51
 -17   1  -1    9.83    0.50
 -17   1   1   10.41    0.60
  17  -1  -1   10.42    0.41
 -17  -1  -1   10.74    0.96
 -17  -1   1   11.17    0.99
 -18   1  -1   12.28    0.55
  18  -1   1   11.30    0.54
 -18   1   1   12.01    0.65
 -18  -1   1   11.08    1.04
 -18  -1  -1   11.71    0.99
  19  -1   1   15.50    0.61
 -19   1  -1   15.08    0.60
 -19   1   1   14.86    0.73
 -19  -1   1   14.38    1.13
 -20   1   1    6.41    0.57
 -20  -1  -1    7.51    0.92
 -20  -1   1    7.12    0.93
 -21  -1   1    0.34    0.75
 -21  -1  -1    0.45    0.77
 -21   1   1    0.94    0.43
 -21   1   1    0.91    0.80
 -22   1   1   12.84    1.13
 -22   1   1   13.88    0.74
 -22  -1   1   15.25    1.20
 -22  -1  -1   15.97    1.17
 -23  -1   1    6.78    0.96
 -23   1   1    6.49    0.59
 -23  -1  -1    7.23    0.96
 -23   1   1    6.34    0.99
 -24  -1   1    6.44    1.05
 -24  -1  -1    5.17    0.91
  24   1   1    6.28    1.04
 -24   1   1    5.60    0.98
  25   1   1   20.46    1.37
 -25   1   1   23.33    1.48
 -25  -1   1   22.34    1.44
 -25  -1  -1   20.74    1.36
 -26  -1  -1    3.33    0.90
  26   1   1    3.50    0.98
 -26  -1   1    4.24    0.94
 -26   1   1    3.17    0.95
 -27   1   1    8.58    1.16
  27   1   1   10.29    1.21
 -27  -1   1    7.55    1.12
 -27  -1  -1   10.41    1.17
 -27   1  -1    8.01    1.12
 -28   1  -1   30.35    1.72
 -28  -1   1   34.77    1.83
  28   1   1   32.29    1.76
 -28   1   1   31.70    1.76
 -28  -1  -1   34.72    1.78
 -29   1  -1    9.61    1.25
 -29   1   1    9.50    1.26
 -29  -1   1    8.22    1.22
 -29  -1  -1    9.62    1.22
  29   1   1    7.67    1.25
 -30  -1   1    3.82    1.08
 -30  -1  -1    3.27    1.10
 -30   1   1    3.39    1.13
 -30   1  -1    3.74    1.06
  30   1   1    3.69    1.19
 -31   1   1    0.72    1.08
 -31  -1  -1    0.60    1.06
  31   1   1    0.56    1.14
 -31  -1   1    0.28    1.01
 -31   1  -1    0.34    1.02
  32   1   1    3.16    1.22
 -32  -1  -1    1.29    1.06
 -32  -1   1    1.57    1.00
 -32   1   1    1.59    1.09
 -32   1  -1    3.07    1.16
 -33   1   1    0.68    1.16
   0   1   2    0.31    0.32
   0  -1   2    0.01    0.22
   0   1   2    0.24    0.20
   0  -1   2    0.09    0.11
   0  -1   2    0.29    0.23
   1   1   2    0.19    0.21
  -1   1   2    0.16    0.30
  -1   1   2    0.22    0.20
   1  -1   2    0.09    0.23
  -1  -1   2    0.15    0.24
   1  -1   2    0.04    0.20
  -1  -1   2    0.09    0.22
  -1  -1   2    0.20    0.10
  -1  -1  -2   -0.02    0.13
   1  -1   2    0.07    0.13
   2  -1   2    0.52    0.19
   2  -1   2    0.41    0.22
   2  -1   2    0.25    0.26
  -2   1   2    0.43    0.35
  -2  -1   2    0.36    0.23
  -2  -1  -2    0.16    0.22
  -2   1   2    0.28    0.19
   2   1   2    0.00    0.23
  -2  -1   2    0.44    0.21
  -3   1   2    1.93    0.34
  -3  -1  -2    2.27    0.29
   3  -1   2    2.00    0.29
   3   1   2    2.29    0.30
  -3  -1   2    2.18    0.24
  -3  -1   2    2.11    0.26
   3  -1   2    2.20    0.29
  -3   1   2    1.89    0.22
  -4  -1  -2    1.67    0.33
  -4  -1   2    1.49    0.24
   4   1   2    1.55    0.31
   4  -1   2    1.62    0.25
  -4   1   2    1.58    0.31
   4  -1   2    1.68    0.32
  -4  -1   2    2.12    0.23
  -5   1   2   32.97    0.70
  -5  -1   2   32.30    0.68
   5   1   2   34.00    0.78
  -5  -1  -2   29.08    0.73
  -5  -1   2   32.60    0.53
   5  -1   2   32.59    0.76
   5  -1   2   32.81    0.67
  -6  -1  -2   20.89    0.68
  -6   1   2   23.94    0.62
   6   1   2   23.39    0.74
   6  -1   2   24.16    0.75
  -6  -1   2   23.44    0.63
  -6  -1   2   23.12    0.44
   6  -1   2   24.38    0.59
   7   1   2    0.60    0.42
  -7   1   2    0.88    0.28
  -7  -1   2    0.91    0.29
  -7  -1   2    1.01    0.17
  -7   1  -2    0.78    0.19
   7  -1   2    0.89    0.25
  -8  -1   2   40.41    0.95
   8   1   2   40.60    1.02
  -8  -1   2   39.24    0.91
  -8  -1   2   39.69    0.53
  -8   1  -2   39.24    0.55
  -8   1   2   41.04    0.82
   8  -1   2   43.04    0.80
  -9   1  -2    0.68    0.20
  -9  -1   2    0.82    0.15
  -9  -1   2    0.93    0.40
   9  -1   2    0.96    0.26
  -9   1   2    1.06    0.29
  -9  -1   2    0.96    0.38
   9   1   2    1.08    0.50
  10  -1  -2   39.98    0.65
  10  -1   2   37.72    0.78
 -10  -1  -2   38.82    1.10
 -10  -1   2   37.19    0.96
 -10  -1   2   39.11    1.03
 -10   1  -2   39.24    0.56
  10   1   2   36.56    1.08
 -10   1   2   40.46    0.87
 -10  -1   2   37.88    0.47
  11  -1   2    1.08    0.27
 -11  -1   2    0.59    0.45
 -11  -1   2    1.24    0.41
 -11   1   2    1.01    0.32
 -11  -1  -2    1.62    0.51
 -11  -1   2    0.92    0.12
  11   1   2    1.06    0.55
  11  -1  -2    1.11    0.22
 -11   1  -2    1.21    0.19
 -12   1   2    0.44    0.34
  12  -1   2    0.36    0.28
 -12  -1  -2    0.54    0.55
 -12  -1   2    0.26    0.41
  12   1   2    0.11    0.59
 -12  -1   2    0.09    0.46
  12  -1  -2   -0.03    0.20
 -12  -1   2    0.09    0.08
 -12   1  -2    0.14    0.19
 -13   1  -2    4.32    0.28
  13  -1   2    3.90    0.37
 -13  -1  -2    4.59    0.64
 -13   1   2    3.59    0.41
 -13  -1   2    4.54    0.53
  13  -1  -2    3.82    0.28
 -13  -1   2    3.58    0.58
  13   1   2    5.20    0.70
 -14   1  -2   -0.14    0.22
 -14  -1   2    0.52    0.53
 -14  -1  -2    0.43    0.58
 -14   1   2    0.14    0.37
 -14  -1   2    0.34    0.43
  14  -1   2    0.17    0.31
  14  -1  -2    0.09    0.19
  14   1   2    0.67    0.67
  15  -1   2    4.46    0.42
 -15   1   2    5.05    0.79
 -15   1  -2    4.16    0.30
  15  -1  -2    4.40    0.28
 -15  -1   2    4.09    0.55
 -15  -1  -2    4.54    0.72
 -15   1   2    4.39    0.49
 -15  -1   2    4.25    0.71
  15   1   2    5.42    0.85
 -16  -1   2    8.17    0.65
 -16   1   2    7.08    0.88
 -16  -1   2    7.32    0.86
 -16   1  -2    7.61    0.39
  16  -1  -2    7.12    0.34
 -16   1   2    7.31    0.57
  16   1   2    8.15    0.93
 -16  -1  -2    7.27    0.85
  16  -1   2    7.93    0.51
 -17   1   2   49.63    1.19
 -17   1   2   47.12    1.61
 -17   1  -2   45.79    0.79
  17   1   2   52.32    1.69
 -17  -1   2   46.27    1.25
 -17  -1  -2   50.12    1.59
 -17  -1   2   47.12    1.56
  17  -1   2   47.61    1.03
  18  -1   2   -0.04    0.37
  18   1   2   -0.39    0.89
 -18   1   2    0.64    0.48
 -18  -1  -2    0.83    0.78
 -18   1   2    0.37    0.83
 -18  -1   2    0.50    0.73
 -19   1   2    1.14    0.79
 -19   1   2    0.31    0.45
 -19  -1   2    0.21    0.77
  19   1   2    0.89    0.88
  19  -1   2    0.34    0.37
 -19  -1  -2    0.94    0.79
 -20  -1   2    1.56    0.75
 -20   1   2    1.48    0.45
 -20  -1  -2    1.73    0.77
 -20   1   2    2.08    0.82
  20   1   2    2.62    0.87
  20  -1   2    1.74    0.38
 -21  -1  -2    1.26    0.75
 -21   1   2    0.83    0.76
 -21   1   2    0.25    0.43
 -21  -1   2    0.52    0.74
  21   1   2    1.23    0.87
 -22   1   2   18.15    1.25
 -22   1   2   18.65    0.88
  22   1   2   19.06    1.28
 -22  -1  -2   19.17    1.24
 -22  -1   2   17.31    1.20
 -23  -1   2    1.82    0.87
 -23   1   2    0.97    0.81
  23   1   2    1.76    0.95
 -23  -1  -2    1.53    0.78
 -23   1   2    1.25    0.49
  24   1   2    2.47    0.94
 -24  -1  -2    2.01    0.79
 -24   1   2    1.76    0.52
 -24   1   2    1.31    0.83
 -24  -1   2    1.23    0.83
 -25   1   2    6.63    0.68
 -25   1   2    5.24    0.99
  25   1   2    7.46    1.13
 -25  -1   2    7.09    1.00
 -25  -1  -2    8.30    1.02
 -26  -1   2    0.19    0.82
 -26   1   2    0.54    0.95
 -26  -1  -2    0.36    0.82
  26   1   2    1.47    0.96
 -27  -1  -2   35.60    1.76
  27   1   2   35.24    1.81
 -27   1   2   33.63    1.78
 -27  -1   2   35.80    1.77
 -28  -1   2    6.46    1.03
 -28   1   2    8.35    1.21
 -28  -1  -2    6.49    1.10
  28   1   2    8.12    1.26
  28  -1   2    7.47    1.23
 -29   1   2    9.70    1.31
 -29   1  -2    9.97    1.28
 -29  -1  -2    8.40    1.17
 -29  -1   2    9.66    1.21
  29   1   2    7.52    1.26
  29  -1   2    9.75    1.32
 -30   1   2    0.79    1.09
 -30   1  -2    4.22    1.12
 -30  -1   2    2.44    1.03
  30   1   2    3.35    1.19
 -30  -1  -2    1.72    0.97
  30  -1   2    1.90    1.13
  31  -1   2    4.80    1.22
 -31   1  -2    4.74    1.14
 -31  -1   2    5.91    1.12
 -31  -1  -2    5.63    1.11
 -31   1   2    3.46    1.15
  31   1   2    5.20    1.31
  32  -1   2    3.71    1.23
 -32  -1   2    2.67    1.00
 -32  -1  -2    4.07    1.18
 -32   1  -2    1.71    1.07
 -32   1   2    4.13    1.19
  32   1   2    2.59    1.28
 -33   1   2    8.09    1.31
   0  -1   3   82.54    0.70
   0  -1   3   79.24    1.01
   0   1   3   78.08    1.04
   0  -1   3   77.86    0.93
   0   1   3   78.36    0.91
   1  -1   3  109.09    1.09
   1   1   3  111.55    1.11
  -1   1   3  111.03    1.07
  -1  -1   3  114.14    0.81
   1  -1   3  112.41    0.86
  -1   1   3  110.98    1.24
   1   1   3  108.14    1.20
  -1  -1   3  112.80    1.12
   1  -1   3  107.32    1.19
  -1  -1   3  109.97    1.16
   2  -1   3    0.29    0.25
   2  -1   3   -0.05    0.18
   2   1   3    0.21    0.29
  -2   1   3    0.50    0.21
  -2  -1   3    0.22    0.14
  -2  -1   3    0.23    0.24
  -2  -1   3    0.30    0.22
   2  -1   3    0.37    0.21
   2   1   3    0.16    0.24
  -2   1   3    0.22    0.28
   3  -1   3   48.10    0.85
  -3  -1   3   47.26    0.78
  -3   1   3   48.79    0.37
   3  -1   3   47.63    0.72
   3   1   3   49.44    0.84
  -3   1   3   46.74    0.86
   3   1   3   45.28    0.79
  -3  -1   3   46.91    0.75
  -3   1   3   47.65    0.74
  -4   1   3   32.62    0.63
  -4   1   3   32.55    0.74
   4  -1   3   32.33    0.71
  -4  -1   3   33.08    0.68
  -4  -1   3   31.52    0.61
   4  -1   3   31.89    0.67
  -4  -1   3   32.39    0.83
  -4   1   3   32.88    0.40
   4   1   3   32.67    0.76
  -5  -1   3  202.35    1.41
  -5  -1   3  200.00    1.64
   5  -1   3  194.11    1.71
   5   1   3  199.05    1.86
  -5  -1   3  201.09    1.95
   5  -1   3  199.66    1.71
  -5   1   3  196.62    1.17
  -5   1   3  198.47    1.73
  -6  -1   3  339.56    6.98
   6   1   3  351.49    2.58
  -6  -1   3  345.11    2.60
  -6   1   3  357.93    7.31
   6  -1   3  359.24    9.14
  -6   1   3  360.64    9.38
   6  -1   3  352.36    2.47
  -6  -1   3  374.31    9.29
  -7  -1   3    1.24    0.40
  -7  -1   3    1.11    0.19
   7   1   3    1.15    0.42
  -7  -1   3    0.85    0.30
  -7   1   3    1.37    0.30
   7  -1   3    1.41    0.27
  -7   1   3    1.33    0.33
   7  -1   3    1.61    0.46
   8   1   3    1.77    0.51
  -8  -1   3    1.65    0.42
   8  -1   3    2.04    0.54
  -8  -1   3    1.32    0.32
   8  -1   3    1.52    0.29
  -8   1   3    1.53    0.32
  -8   1  -3    1.80    0.19
  -8  -1   3    1.50    0.20
  -8   1   3    1.38    0.33
  -9   1  -3   19.63    0.37
   9   1   3   19.10    0.86
   9  -1   3   18.70    0.62
   9  -1   3   20.69    0.91
  -9   1   3   20.10    0.69
  -9   1   3   18.12    0.67
  -9  -1   3   19.57    0.42
  -9  -1   3   20.55    0.73
  -9  -1   3   19.72    0.75
  10  -1   3    8.81    0.48
 -10  -1   3    7.58    0.27
 -10   1   3    7.87    0.50
  10  -1   3    8.83    0.75
 -10  -1   3    8.72    0.59
 -10   1  -3    7.87    0.24
  10   1   3    8.81    0.73
 -10  -1   3    8.85    0.57
 -10   1   3    7.14    0.55
 -11   1   3   24.87    0.88
  11  -1   3   27.26    0.76
  11  -1   3   24.19    1.08
 -11  -1   3   24.92    0.41
 -11  -1   3   26.66    0.92
 -11   1   3   27.15    0.81
 -11   1  -3   23.51    0.39
  11   1   3   25.29    1.02
 -11  -1   3   24.88    0.88
  12  -1  -3   19.78    0.49
 -12   1   3   18.74    0.86
  12   1   3   21.08    1.01
 -12   1   3   21.33    0.75
 -12   1  -3   20.00    0.37
 -12  -1   3   19.48    0.86
 -12  -1   3   18.40    0.80
  12  -1   3   18.63    1.03
  12  -1   3   19.79    0.68
 -13   1  -3   31.54    0.47
 -13   1   3   34.28    0.95
  13  -1   3   33.16    1.32
 -13  -1   3   31.35    1.10
  13   1   3   35.51    1.27
 -13  -1   3   32.75    1.03
  13  -1   3   31.63    0.86
 -13   1   3   30.71    1.09
  13  -1  -3   33.31    0.61
 -14  -1   3    0.55    0.52
  14  -1   3    1.00    0.86
 -14  -1   3    0.44    0.53
 -14   1   3    0.71    0.61
  14   1   3    0.70    0.78
  14  -1  -3    0.15    0.23
  14  -1   3    0.63    0.37
 -14   1  -3    0.07    0.16
 -14   1   3    0.68    0.40
 -15   1  -3    5.08    0.25
  15  -1   3    5.18    0.49
 -15  -1   3    6.90    0.72
 -15  -1   3    5.52    0.61
 -15   1   3    5.82    0.55
  15  -1  -3    6.16    0.32
  15   1   3    5.92    0.92
 -15   1   3    6.20    0.77
  15  -1   3    6.47    0.93
 -16  -1   3   83.38    1.88
  16   1   3   90.68    2.12
  16  -1   3   86.85    1.44
  16  -1  -3   90.90    0.91
 -16   1   3   91.26    1.60
 -16  -1   3   90.95    1.73
  16  -1   3   89.12    2.18
 -16   1   3   85.04    1.93
 -17   1   3   49.39    1.25
 -17  -1   3   52.44    1.60
 -17  -1  -3   53.36    1.63
  17  -1   3   55.35    1.85
 -17   1   3   50.37    1.60
  17   1   3   55.59    1.77
 -17  -1   3   52.83    1.39
  17  -1   3   48.32    1.13
 -18  -1   3   46.94    1.58
 -18  -1  -3   46.68    1.59
 -18  -1   3   45.09    1.32
 -18   1   3   45.28    1.24
  18   1   3   49.35    1.74
  18  -1   3   49.47    1.80
 -18   1   3   46.89    1.62
  18  -1   3   47.14    1.14
 -19  -1   3    1.44    0.68
  19  -1   3    1.45    0.42
  19   1   3    1.55    0.82
 -19  -1  -3    1.69    0.70
 -19  -1   3    2.05    0.56
  19  -1   3    2.96    0.96
 -19   1   3    1.83    0.50
 -19   1   3    1.49    0.76
 -20  -1  -3    9.46    0.93
 -20  -1   3    9.35    0.75
  20  -1   3    7.95    0.58
  20   1   3    9.41    1.05
 -20   1   3    9.02    0.70
 -20  -1   3    8.14    0.87
  20  -1   3    9.81    1.07
 -20   1   3    8.80    0.98
  21  -1   3    0.94    0.42
 -21   1   3    0.74    0.49
 -21  -1   3    2.18    0.69
  21   1   3    1.44    0.90
 -21   1   3    0.85    0.76
 -21  -1  -3    1.01    0.73
 -21  -1   3    0.57    0.52
  21  -1   3    2.70    0.95
 -22   1   3   39.75    1.69
  22   1   3   38.50    1.72
 -22   1   3   35.67    1.22
  22  -1   3   39.18    1.75
 -22  -1   3   41.54    1.65
 -22  -1  -3   39.30    1.62
  23   1   3   30.20    1.59
  23  -1   3   31.59    1.62
 -23  -1  -3   31.64    1.50
 -23   1   3   34.49    1.64
 -23   1   3   31.30    1.18
 -23  -1   3   32.79    1.54
  24  -1   3    4.69    1.01
 -24   1   3    3.41    0.93
 -24   1   3    2.84    0.59
  24   1   3    3.69    0.97
 -24  -1  -3    3.25    0.85
 -24  -1   3    4.32    0.85
 -25   1   3    0.90    0.91
 -25  -1   3    1.42    0.84
 -25  -1  -3    2.16    0.86
 -25   1   3    0.51    0.55
  25   1   3    1.61    1.01
  25  -1   3    2.00    1.06
 -26  -1   3    0.73    0.79
 -26   1   3    0.21    0.92
 -26  -1  -3    0.61    0.85
 -26   1   3    0.35    0.56
  26   1   3    0.21    0.96
  26  -1   3    0.54    0.96
 -27   1   3    4.02    1.05
 -27  -1   3    6.29    1.06
 -27  -1  -3    5.60    1.00
  27   1   3    4.52    1.14
  27  -1   3    5.32    1.12
  28   1   3   35.63    1.91
 -28   1   3   33.04    1.83
  28  -1   3   31.69    1.87
 -28  -1   3   32.07    1.74
 -28  -1  -3   33.14    1.75
  29  -1   3    2.78    1.27
 -29   1   3    1.46    1.02
  29   1   3    2.59    1.23
 -29  -1  -3    1.32    0.99
 -29  -1   3    3.01    1.03
 -30  -1  -3    9.36    1.23
 -30   1   3    7.89    1.29
 -30  -1   3    8.59    1.21
  30   1   3   10.41    1.41
  30  -1   3    9.05    1.43
 -31   1  -3    4.14    1.13
 -31   1   3    3.74    1.22
 -31  -1  -3    5.97    1.17
  31  -1   3    4.72    1.31
 -31  -1   3    4.67    1.16
  31   1   3    5.11    1.31
  32  -1   3    0.66    1.26
 -32   1   3    0.37    1.15
 -32  -1  -3    0.74    1.06
 -32   1  -3    0.44    1.08
 -32  -1   3   -0.12    1.11
  32   1   3    0.72    1.28
 -33   1   3    0.25    1.16
   0  -1   4   -0.07    0.21
   0  -1   4   -0.10    0.27
   0   1   4   -0.04    0.23
   0   1   4    0.19    0.28
   0  -1   4    0.01    0.17
   1   1   4   13.25    0.52
  -1  -1   4   14.13    0.38
   1  -1   4   14.17    0.40
  -1   1   4   14.26    0.49
   1  -1   4   14.13    0.48
  -1  -1   4   13.33    0.47
   1   1   4   14.10    0.50
  -1   1   4   13.82    0.54
  -1  -1   4   13.43    0.52
   1  -1   4   13.71    0.54
  -2  -1   4    1.15    0.24
   2  -1   4    1.10    0.22
  -2  -1   4    1.07    0.18
   2  -1   4    1.28    0.26
   2   1   4    0.99    0.30
  -2   1   4    1.14    0.29
  -2   1   4    1.02    0.08
  -2  -1   4    1.04    0.36
  -2   1   4    0.99    0.25
   2   1   4    1.12    0.26
   2  -1   4    1.36    0.29
  -2  -1   4    1.14    0.27
  -3  -1   4   43.74    0.64
  -3   1   4   43.39    0.89
   3  -1   4   43.91    0.90
   3   1   4   43.83    0.87
  -3   1   4   44.35    0.79
  -3  -1   4   42.96    0.81
  -3  -1   4   44.02    1.00
   3  -1   4   43.36    0.74
  -3  -1   4   43.61    0.80
  -3   1   4   43.74    0.40
   3   1   4   41.63    0.81
   4  -1   4    6.41    0.44
   4   1   4    5.98    0.41
  -4   1   4    5.17    0.42
   4   1   4    5.86    0.43
  -4  -1   4    6.00    0.50
   4  -1   4    5.96    0.38
  -4  -1   4    6.13    0.37
  -4  -1   4    6.48    0.38
  -4   1   4    6.35    0.37
  -4   1   4    6.26    0.20
   5  -1   4   57.41    1.06
  -5   1   4   56.89    0.93
  -5   1   4   58.80    0.62
   5   1   4   57.93    1.10
   5  -1   4   56.37    0.99
  -5  -1   4   55.04    1.14
  -5  -1   4   56.66    0.96
  -5  -1   4   54.98    0.88
   5   1   4   55.25    0.90
  -5   1   4   57.38    1.05
   6   1   4    1.90    0.33
   6  -1   4    0.87    0.36
  -6  -1   4    0.55    0.25
  -6  -1   4    0.50    0.28
  -6  -1   4    0.80    0.36
   6  -1   4    0.62    0.30
  -6   1   4    0.72    0.30
  -6   1   4    0.48    0.17
   6   1   4    0.35    0.41
  -7  -1   4   12.71    0.45
   7  -1   4   12.42    0.66
  -7  -1   4   12.79    0.66
  -7  -1   4   12.56    0.54
   7   1   4   12.90    0.50
   7   1   4   13.37    0.69
  -7   1   4   12.50    0.57
   7  -1   4   11.73    0.55
  -7   1   4   13.23    0.41
  -8  -1   4    0.88    0.33
   8  -1   4    0.83    0.34
  -8  -1   4    0.77    0.44
  -8   1   4    0.95    0.36
  -8   1   4    0.91    0.25
   8   1   4    1.08    0.46
  -8  -1   4    0.86    0.24
   8  -1   4    0.91    0.50
  -9  -1   4    1.07    0.24
  -9  -1   4    1.02    0.44
  -9   1  -4    0.79    0.14
  -9  -1   4    0.93    0.36
   9   1   4    0.99    0.50
   9  -1   4    1.08    0.33
  -9   1   4    0.72    0.30
   9  -1   4    0.65    0.55
  -9   1   4    0.89    0.38
 -10  -1   4    0.12    0.21
 -10   1   4    0.18    0.40
 -10  -1   4   -0.16    0.36
 -10   1  -4    0.01    0.10
 -10   1   4   -0.05    0.35
 -10  -1   4    0.29    0.43
  10   1   4    0.45    0.52
  10  -1   4   -0.16    0.61
  10  -1   4    0.20    0.33
 -11  -1   4    5.08    0.30
 -11  -1   4    5.60    0.55
  11   1   4    5.64    0.73
  11  -1   4    5.50    0.76
 -11  -1   4    6.11    0.60
 -11   1   4    5.35    0.48
 -11   1   4    6.09    0.52
 -11   1  -4    5.22    0.14
  11  -1   4    5.99    0.49
 -12  -1   4    3.44    0.57
 -12  -1   4    3.46    0.50
  12  -1   4    3.22    0.78
 -12   1   4    2.66    0.49
  12   1   4    3.18    0.72
 -12  -1   4    2.85    0.25
  12  -1   4    2.91    0.43
 -12   1   4    3.78    0.49
  13   1   4   38.37    1.36
  13  -1   4   38.79    1.02
 -13  -1   4   39.59    1.18
  13  -1   4   38.52    1.48
 -13  -1   4   39.85    1.19
 -13   1   4   38.29    1.13
 -13   1   4   41.24    1.11
  14   1   4    8.79    0.96
 -14   1   4    8.99    0.64
 -14  -1   4    9.16    0.73
  14  -1  -4    9.41    0.40
  14  -1   4    9.65    0.61
  14  -1   4    9.85    1.03
 -14  -1   4   10.06    0.75
 -14   1   4    9.14    0.73
  15  -1  -4   15.68    0.46
 -15  -1   4   15.86    0.86
 -15  -1   4   15.40    0.92
 -15   1   4   15.91    0.80
 -15   1   4   13.71    0.89
  15  -1   4   15.15    1.18
  15  -1   4   15.08    0.73
  15   1   4   14.03    1.05
 -16   1   4   36.26    1.13
  16  -1   4   35.49    1.60
 -16   1   4   35.50    1.29
  16   1   4   35.11    1.49
 -16  -1   4   33.27    1.19
 -16  -1   4   32.08    1.26
  16  -1   4   33.75    1.02
  17  -1   4    2.46    0.47
 -17  -1   4    3.00    0.64
 -17   1   4    2.18    0.70
 -17  -1   4    2.49    0.71
 -17   1   4    3.14    0.57
  17   1   4    2.37    0.90
  17  -1   4    3.56    1.02
  18   1   4    1.61    0.82
 -18  -1   4    1.84    0.61
 -18   1   4    2.28    0.72
  18  -1   4    2.38    0.49
  18  -1   4    2.98    1.00
 -18  -1   4    1.41    0.67
 -18   1   4    2.44    0.55
  19  -1   4    2.69    0.49
 -19  -1   4    2.12    0.65
 -19   1   4    2.91    0.77
  19  -1   4    3.15    0.95
  19   1   4    2.99    0.94
 -19   1   4    3.03    0.56
 -19  -1   4    2.58    0.60
  20  -1   4    2.99    0.96
 -20   1   4    1.31    0.51
 -20   1   4    0.83    0.70
  20   1   4    2.07    0.87
  20  -1   4    1.06    0.45
 -20  -1   4    1.59    0.59
 -20  -1   4    0.83    0.70
 -21   1   4    3.70    0.61
 -21  -1   4    4.06    0.68
  21  -1   4    3.62    0.53
 -21  -1   4    4.44    0.79
  21  -1   4    4.81    1.03
 -21   1   4    3.72    0.85
 -21  -1  -4    4.11    0.84
  21   1   4    3.33    1.00
  22   1   4    0.31    1.00
 -22  -1   4    0.97    0.71
 -22   1   4    0.34    0.82
 -22  -1   4    0.52    0.60
 -22  -1  -4    0.59    0.73
 -22   1   4    0.45    0.54
  22  -1   4    0.82    0.50
  22  -1   4    0.70    0.95
 -23   1   4    1.73    0.84
 -23   1   4    1.64    0.57
 -23  -1   4    1.88    0.76
 -23  -1   4    1.97    0.65
 -23  -1  -4    1.78    0.77
  23   1   4    1.54    0.99
  23  -1   4    3.04    1.10
 -24  -1   4    0.85    0.75
 -24   1   4    0.97    0.83
 -24   1   4    0.37    0.59
 -24  -1  -4    1.33    0.81
  24   1   4    0.05    1.04
  24  -1   4    1.85    1.04
 -25  -1   4   18.33    1.32
  25  -1   4   21.20    1.56
 -25   1   4   18.12    1.05
 -25  -1  -4   16.63    1.24
 -25   1   4   19.57    1.40
  25   1   4   19.86    1.52
  26   1   4    1.46    1.11
 -26  -1   4    1.73    0.84
 -26   1   4    0.61    0.63
 -26  -1  -4    1.66    0.89
 -26   1   4    0.59    0.90
  26  -1   4    2.28    1.15
  27   1   4   18.22    1.53
 -27  -1  -4   17.76    1.34
  27  -1   4   21.05    1.63
 -27   1   4   16.87    1.07
 -27  -1   4   16.89    1.38
 -27   1   4   17.46    1.43
 -28  -1   4    6.92    1.10
  28  -1   4    5.71    1.28
 -28   1   4    4.98    1.11
 -28   1   4    4.86    0.78
 -28  -1  -4    5.78    1.07
  28   1   4    6.77    1.31
 -29  -1   4    1.95    0.99
 -29   1   4    1.05    1.04
 -29  -1  -4    2.25    1.01
  29   1   4    2.58    1.20
  29  -1   4    3.57    1.33
 -30  -1   4    0.90    0.97
 -30  -1  -4    0.17    1.02
 -30   1   4    0.16    1.07
  30  -1   4    0.73    1.19
  30   1   4   -0.24    1.25
 -31  -1   4    0.28    1.06
 -31  -1  -4    0.52    1.03
  31  -1   4    0.12    1.27
  31   1   4    0.88    1.13
 -32   1   4    1.55    1.04
 -33   1   4   -0.20    1.08
   0  -1   5   69.68    1.21
   0  -1   5   70.84    0.92
   0  -1   5   72.66    1.07
   0   1   5   71.07    1.08
   0  -1   5   69.05    1.23
   0   1   5   69.50    1.13
   1  -1   5   14.52    0.63
  -1  -1   5   15.22    0.47
  -1  -1   5   14.94    0.53
  -1  -1   5   13.97    0.60
   1  -1   5   14.67    0.48
   1  -1   5   14.55    0.54
   1   1   5   13.24    0.56
  -1   1   5   14.65    0.55
  -1  -1   5   15.38    0.67
  -1   1   5   16.56    0.62
   1   1   5   14.22    0.57
   2  -1   5    8.44    0.40
  -2   1   5    8.49    0.45
  -2  -1   5    8.07    0.57
  -2   1   5    8.18    0.51
   2  -1   5    7.94    0.43
  -2  -1   5    8.58    0.38
   2   1   5    8.46    0.48
  -2  -1   5    8.81    0.50
  -2  -1   5    8.54    0.45
   2   1   5    8.18    0.47
   2  -1   5    8.59    0.53
  -3  -1   5   -0.03    0.29
  -3  -1   5    0.32    0.32
  -3   1   5    0.18    0.28
  -3  -1   5   -0.04    0.22
   3  -1   5    0.16    0.33
   3   1   5    0.49    0.33
  -3   1   5    0.78    0.33
   3  -1   5   -0.05    0.27
   3   1   5    0.64    0.31
  -3  -1   5    0.75    0.43
  -3   1   5    0.38    0.13
  -4  -1   5   14.86    0.58
  -4  -1   5   15.03    0.71
   4   1   5   15.49    0.65
  -4   1   5   15.56    0.57
   4  -1   5   15.74    0.56
  -4  -1   5   15.32    0.48
   4  -1   5   15.10    0.66
  -4   1   5   15.19    0.65
   4   1   5   15.09    0.55
  -4   1   5   14.80    0.32
  -4  -1   5   15.54    0.57
  -5  -1   5   12.19    0.54
   5   1   5   11.91    0.50
  -5  -1   5   11.74    0.65
   5  -1   5   12.91    0.62
   5   1   5   11.73    0.60
   5  -1   5   12.27    0.56
  -5   1   5   12.65    0.60
  -5   1   5   12.42    0.53
  -5   1   5   12.68    0.33
  -5  -1   5   12.03    0.52
  -6   1   5    0.79    0.17
   6  -1   5    1.26    0.39
  -6  -1   5    1.10    0.31
   6   1   5    1.03    0.30
   6  -1   5    0.98    0.38
  -6  -1   5    1.46    0.43
   6   1   5    0.97    0.43
  -6   1   5    1.54    0.31
  -6   1   5    0.80    0.40
  -6  -1   5    1.25    0.30
  -7  -1   5    0.35    0.30
  -7  -1   5    0.22    0.30
  -7  -1   5    0.31    0.46
   7  -1   5    0.31    0.38
  -7   1   5    0.03    0.36
   7   1   5   -0.04    0.31
   7   1   5    0.09    0.43
   7  -1   5    0.18    0.39
  -7   1   5    0.44    0.19
   8   1   5    0.66    0.32
  -8   1   5    0.77    0.40
  -8  -1   5    0.57    0.30
   8  -1   5    1.11    0.40
  -8   1   5    0.40    0.22
  -8  -1   5    0.92    0.45
   8   1   5    0.57    0.48
  -8  -1   5    0.69    0.32
   8  -1   5    0.55    0.44
  -9  -1   5    5.65    0.58
  -9  -1   5    4.58    0.39
  -9   1   5    4.59    0.52
   9  -1   5    4.54    0.49
   9  -1   5    4.75    0.58
   9   1   5    4.25    0.38
  -9   1   5    4.76    0.35
   9   1   5    4.79    0.60
  -9  -1   5    4.91    0.45
  10  -1   5    6.58    0.54
  10  -1   5    6.14    0.72
  10   1   5    5.88    0.41
 -10   1   5    6.34    0.41
  10   1   5    5.62    0.65
 -10  -1   5    5.97    0.52
 -10  -1   5    5.93    0.41
 -10  -1   5    6.28    0.60
 -10   1   5    6.38    0.55
 -11  -1   5   34.98    0.79
 -11   1   5   36.52    0.86
  11  -1   5   39.19    1.08
  11  -1   5   35.59    1.28
 -11   1   5   37.98    1.08
  11   1   5   35.10    0.74
 -11  -1   5   35.47    1.02
 -11  -1   5   37.26    1.18
  11   1   5   37.81    1.26
  12   1   5    1.62    0.67
 -12   1   5    1.95    0.39
  12  -1   5    1.28    0.44
 -12  -1   5    1.62    0.46
  12  -1   5    0.91    0.74
 -12  -1   5    1.52    0.58
  12   1   5    1.99    0.35
 -12  -1   5    1.79    0.34
 -12   1   5    1.71    0.50
 -13   1   5    0.27    0.39
  13  -1   5    0.00    0.45
 -13  -1   5    0.36    0.49
 -13  -1   5    0.14    0.52
  13   1   5    0.99    0.71
  13  -1   5    0.30    0.80
 -13   1   5    0.34    0.49
  14   1   5   16.82    1.08
 -14   1   5   16.31    0.79
 -14   1   5   16.45    0.83
 -14  -1   5   15.72    0.93
  14  -1   5   15.83    1.18
 -14  -1   5   15.99    0.86
  14  -1   5   17.19    0.82
  15  -1   5    0.09    0.46
 -15  -1   5   -0.01    0.54
 -15   1   5    0.14    0.49
  15  -1   5   -0.40    0.97
 -15  -1   5    0.03    0.57
  15   1   5   -0.49    0.80
 -15   1   5    0.38    0.52
 -16  -1   5    4.08    0.69
  16  -1   5    3.87    1.06
 -16   1   5    4.15    0.62
  16  -1   5    3.11    0.53
  16   1   5    3.50    0.92
 -16   1   5    4.92    0.65
 -16  -1   5    3.91    0.67
  17  -1   5    4.60    0.58
 -17   1   5    5.50    0.69
 -17  -1   5    4.86    0.73
 -17  -1   5    5.01    0.71
  17   1   5    4.73    0.93
  17  -1   5    5.02    1.04
 -17   1   5    4.58    0.63
 -18   1   5   13.85    0.85
 -18  -1   5   13.05    0.95
 -18   1   5   12.91    0.89
  18   1   5   14.72    1.20
 -18  -1   5   16.07    0.98
  18  -1   5   13.87    0.80
  18  -1   5   15.25    1.30
 -19  -1   5    0.37    0.60
  19  -1   5    0.46    0.45
 -19   1   5    0.50    0.62
 -19  -1   5    0.59    0.63
 -19   1   5    0.61    0.51
  19   1   5    0.41    0.88
  19  -1   5    0.74    1.01
 -20   1   5    0.13    0.52
 -20  -1   5    0.36    0.61
  20  -1   5    0.68    0.96
 -20   1   5    0.05    0.65
 -20  -1   5    0.01    0.63
  20   1   5    0.15    0.87
  20  -1   5    0.40    0.48
  21  -1   5    0.90    1.04
  21   1   5    1.29    0.97
  21  -1   5    0.61    0.50
 -21   1   5    0.93    0.68
 -21   1   5    0.62    0.58
 -21  -1   5    1.05    0.65
 -21  -1   5    0.38    0.72
  22   1   5    2.35    0.95
 -22  -1   5    2.18    0.71
 -22  -1   5    1.67    0.69
 -22   1   5    2.32    0.76
  22  -1   5    2.80    0.56
 -22   1   5    1.55    0.62
  22  -1   5    1.82    1.10
  23  -1   5   16.62    1.52
 -23  -1   5   15.59    1.17
  23   1   5   17.01    1.40
 -23   1   5   15.38    0.98
 -23  -1   5   15.29    1.05
 -23   1   5   15.24    1.16
 -23  -1  -5   15.56    1.17
  24   1   5    4.91    1.14
 -24   1   5    3.20    0.86
 -24  -1   5    4.42    0.89
 -24  -1  -5    4.26    0.90
 -24   1   5    4.14    0.71
 -24  -1   5    4.72    0.79
  24  -1   5    4.46    1.20
 -25  -1   5    2.05    0.87
 -25   1   5    2.64    0.67
 -25  -1   5    2.74    0.74
 -25  -1  -5    2.41    0.86
 -25   1   5    2.08    0.86
  25   1   5    2.32    1.12
  25  -1   5    1.88    1.12
 -26  -1   5    3.88    0.97
 -26  -1  -5    4.87    0.96
 -26   1   5    3.98    0.76
  26  -1   5    4.33    1.24
 -26   1   5    3.76    0.94
  26   1   5    4.33    1.19
 -27  -1   5    0.22    0.90
 -27  -1  -5    0.33    0.90
 -27   1   5    0.50    0.64
  27   1   5    0.22    1.19
  27  -1   5   -0.20    1.29
 -27   1   5    0.15    0.90
  28  -1   5    2.80    1.25
 -28  -1   5    1.70    0.95
 -28   1   5    1.06    1.00
 -28   1   5    1.72    0.71
 -28  -1  -5    1.25    0.94
  28   1   5    1.40    1.11
 -29  -1   5   -0.10    0.98
 -29   1   5   -0.06    0.96
 -29   1   5    0.22    0.75
 -29  -1  -5    0.59    0.95
  29   1   5   -0.01    1.21
  29  -1   5   -0.63    1.33
  30  -1   5    4.56    1.35
 -30  -1   5    4.48    1.10
 -30  -1  -5    4.98    1.09
 -30   1   5    3.61    1.09
  30   1   5    3.31    1.30
 -31  -1  -5    2.27    1.00
 -31  -1   5    3.44    1.08
 -31   1   5    1.79    1.00
  31  -1   5    3.92    1.44
 -32   1   5    0.37    1.07
   0  -1   6    0.13    0.38
   0  -1   6    0.08    0.26
   0   1   6   -0.20    0.35
   0  -1   6   -0.16    0.29
   0   1   6   -0.09    0.28
   0  -1   6    0.08    0.43
   1   1   6    8.85    0.52
   1   1   6    8.76    0.53
   1  -1   6    9.28    0.48
  -1  -1   6    9.39    0.49
  -1  -1   6    9.38    0.43
   1  -1   6    8.68    0.58
  -1   1   6    9.29    0.55
  -1  -1   6    8.93    0.62
   1  -1   6    9.18    0.45
   1  -1   6    9.81    0.61
  -1  -1   6    9.10    0.58
  -1   1   6    9.01    0.51
   2   1   6    1.85    0.37
  -2   1   6    1.98    0.40
  -2  -1   6    1.64    0.40
   2  -1   6    1.70    0.30
  -2  -1   6    2.24    0.48
  -2  -1   6    2.08    0.30
   2  -1   6    2.24    0.43
  -2   1   6    2.11    0.36
   2   1   6    1.95    0.35
  -2  -1   6    1.72    0.32
  -3  -1   6    0.05    0.26
  -3  -1   6   -0.03    0.46
   3  -1   6    0.16    0.30
  -3  -1   6    0.21    0.37
   3  -1   6   -0.03    0.38
   3   1   6    0.22    0.33
  -3   1   6    0.11    0.37
  -3   1   6    0.15    0.15
  -3   1   6    0.03    0.28
  -3  -1   6    0.04    0.30
   3   1   6    0.32    0.33
  -4   1   6    4.25    0.23
  -4   1   6    4.00    0.49
  -4  -1   6    4.29    0.56
   4  -1   6    4.13    0.40
   4   1   6    4.18    0.44
  -4  -1   6    4.13    0.39
  -4   1   6    4.84    0.43
  -4  -1   6    4.10    0.35
  -4  -1   6    4.51    0.47
   4   1   6    3.44    0.39
   4  -1   6    4.01    0.52
  -5   1   6    1.12    0.19
  -5  -1   6    1.24    0.32
  -5  -1   6    0.95    0.27
   5  -1   6    1.19    0.42
  -5   1   6    1.11    0.44
   5   1   6    1.45    0.40
  -5  -1   6    1.43    0.52
  -5   1   6    1.49    0.33
   5   1   6    1.18    0.35
   5  -1   6    0.62    0.35
  -5  -1   6    1.38    0.39
   6   1   6   11.77    0.52
  -6   1   6   11.86    0.57
  -6  -1   6   12.41    0.77
  -6  -1   6   12.62    0.57
  -6   1   6   12.15    0.37
  -6  -1   6   11.56    0.61
  -6   1   6   11.41    0.68
   6   1   6   12.56    0.70
   6  -1   6   11.80    0.62
   6  -1   6   11.87    0.69
   7  -1   6    1.38    0.45
  -7   1   6    1.81    0.39
  -7  -1   6    1.86    0.38
  -7   1   6    1.79    0.24
   7  -1   6    1.92    0.45
   7   1   6    1.33    0.51
  -7  -1   6    1.28    0.40
  -7   1   6    1.35    0.47
  -7  -1   6    1.54    0.52
   7   1   6    1.42    0.34
   8  -1   6   30.01    1.01
   8   1   6   29.48    1.04
  -8  -1   6   30.61    1.08
  -8  -1   6   29.80    0.86
   8   1   6   28.41    0.71
   8  -1   6   30.85    1.00
  -8   1   6   30.90    0.63
  -8   1   6   31.33    1.02
  -8  -1   6   28.90    0.86
  -9  -1   6    1.29    0.38
  -9   1   6    1.23    0.28
  -9   1   6    1.10    0.50
   9  -1   6    1.49    0.51
  -9  -1   6    1.25    0.55
   9   1   6    1.34    0.32
  -9  -1   6    1.12    0.41
   9  -1   6    1.09    0.55
   9   1   6    1.57    0.60
 -10  -1   6   51.30    1.40
 -10  -1   6   48.34    1.08
  10  -1   6   49.71    1.29
 -10   1   6   48.21    1.27
  10   1   6   47.55    0.83
  10   1   6   49.42    1.42
 -10   1   6   48.65    0.88
  10  -1   6   47.37    1.34
 -10  -1   6   49.20    1.14
 -11  -1   6   29.94    0.89
  11  -1   6   30.35    1.06
  11  -1   6   30.40    1.19
  11   1   6   30.15    1.20
  11   1   6   27.69    0.64
 -11   1   6   31.26    0.78
 -11  -1   6   31.39    1.15
 -11   1   6   30.26    1.08
 -11  -1   6   29.75    0.95
 -12  -1   6    9.21    0.65
  12   1   6    8.47    0.84
  12  -1   6    9.16    0.89
 -12   1   6   10.47    0.76
 -12   1   6    8.47    0.51
  12  -1   6   10.12    0.70
 -12  -1   6    8.72    0.80
 -12  -1   6    9.08    0.58
  13  -1   6    1.82    0.77
  13   1   6    1.83    0.71
 -13  -1   6    1.97    0.54
 -13  -1   6    1.57    0.62
 -13   1   6    1.78    0.41
  13  -1   6    2.07    0.52
 -13   1   6    1.68    0.58
  14  -1   6   27.37    1.07
 -14   1   6   25.87    1.08
 -14  -1   6   25.69    1.03
 -14  -1   6   27.21    1.18
  14   1   6   25.72    1.23
  14  -1   6   25.92    1.35
 -14   1   6   24.78    0.86
 -15  -1   6    4.77    0.63
 -15   1   6    4.30    0.53
  15  -1   6    3.99    0.94
 -15  -1   6    4.99    0.70
  15  -1   6    4.20    0.59
  15   1   6    4.72    0.84
 -15   1   6    3.75    0.62
  16  -1   6   11.65    0.78
 -16   1   6   12.69    0.85
  16   1   6   13.09    1.05
 -16  -1   6   12.43    0.82
 -16  -1   6   10.95    0.89
  16  -1   6   12.74    1.18
 -16   1   6   11.66    0.73
 -17  -1   6    7.24    0.74
  17   1   6    8.68    0.98
 -17   1   6    6.18    0.62
 -17   1   6    7.84    0.74
  17  -1   6    7.06    0.68
  17  -1   6    7.37    1.09
 -17  -1   6    8.14    0.81
  18  -1   6    2.56    0.55
 -18   1   6    1.40    0.55
 -18  -1   6    1.78    0.60
  18   1   6    1.98    0.80
  18  -1   6    1.64    0.94
 -18   1   6    1.96    0.60
 -18  -1   6    1.63    0.61
 -19   1   6   13.38    0.92
  19   1   6   14.17    1.16
 -19  -1   6   12.98    0.95
  19  -1   6   14.23    0.88
 -19  -1   6   12.83    0.96
  19  -1   6   12.95    1.33
 -19   1   6   14.24    0.92
 -20  -1   6    0.24    0.66
  20   1   6    1.50    0.86
  20  -1   6    0.72    0.54
 -20  -1   6    0.36    0.62
 -20   1   6    0.35    0.57
 -20   1   6    0.41    0.61
  20  -1   6   -0.43    1.08
  21  -1   6   20.65    1.07
 -21  -1   6   22.31    1.21
  21   1   6   20.03    1.38
 -21  -1   6   21.13    1.21
 -21   1   6   21.17    1.13
  21  -1   6   20.28    1.56
 -21   1   6   22.19    1.19
 -22   1   6    4.34    0.79
 -22  -1   6    5.82    0.81
 -22  -1   6    6.32    0.84
  22   1   6    6.24    1.09
 -22   1   6    5.96    0.77
  22  -1   6    6.28    1.22
  22  -1   6    4.89    0.71
 -23  -1   6    4.48    0.84
 -23  -1   6    5.06    0.85
 -23   1   6    3.80    0.81
  23   1   6    7.02    1.13
  23  -1   6    3.85    0.69
  23  -1   6    5.59    1.27
 -23   1   6    4.47    0.75
 -24   1   6   13.04    1.03
 -24  -1   6   13.65    1.11
 -24  -1   6   13.15    1.17
  24   1   6   10.35    1.30
 -24   1   6   11.21    1.08
  24  -1   6   13.24    1.51
 -25  -1  -6    0.87    0.82
 -25  -1   6   -0.14    0.75
 -25   1   6   -0.55    0.79
 -25  -1   6    1.44    0.86
  25   1   6   -0.03    1.18
 -25   1   6    0.23    0.72
  25  -1   6    0.49    1.27
  26   1   6    2.81    1.19
 -26  -1   6    2.92    0.90
 -26  -1   6    2.49    0.82
 -26   1   6    2.70    0.90
 -26  -1  -6    4.60    1.01
 -26   1   6    3.15    0.79
  26  -1   6    3.95    1.36
  27  -1   6    0.37    1.28
  27   1   6    1.22    1.23
 -27   1   6    1.73    0.92
 -27   1   6    1.22    0.74
 -27  -1  -6    1.38    0.92
 -27  -1   6    1.19    0.91
  28   1   6    2.29    1.24
 -28   1   6    3.16    0.97
 -28  -1   6    2.92    1.03
 -28   1   6    2.11    0.79
 -28  -1  -6    3.87    1.04
  28  -1   6    3.81    1.32
 -29  -1  -6    0.60    0.96
 -29   1   6    0.31    0.74
  29   1   6   -0.16    1.34
 -29  -1   6    0.30    1.05
  29  -1   6   -0.39    1.36
 -30   1   6    6.14    0.95
  30   1   6    4.72    1.29
 -30  -1  -6    5.16    1.08
  30  -1   6    5.47    1.46
 -30  -1   6    5.87    1.15
   0  -1   7  363.77    2.61
   0  -1   7  362.55    2.45
   0   1   7  355.97    2.75
   0  -1   7  362.72    3.18
   0   1   7  348.16    2.83
   0  -1   7  354.69    3.12
  -1  -1   7   49.67    1.26
  -1  -1   7   50.22    0.97
   1  -1   7   48.38    1.22
   1  -1   7   47.57    1.25
  -1   1   7   50.52    1.10
   1  -1   7   49.85    1.04
   1   1   7   49.76    1.11
  -1  -1   7   50.18    1.30
   1  -1   7   49.88    0.98
  -1  -1   7   48.16    1.03
   1   1   7   46.39    1.09
  -1   1   7   46.76    1.15
  -2  -1   7    6.31    0.60
   2  -1   7    6.40    0.64
   2   1   7    5.51    0.52
   2  -1   7    6.31    0.47
  -2  -1   7    6.04    0.66
  -2  -1   7    6.16    0.49
  -2   1   7    5.90    0.49
   2  -1   7    6.00    0.58
  -2  -1   7    5.64    0.44
  -2   1   7    5.69    0.57
   2   1   7    5.44    0.51
  -3   1   7    0.34    0.44
  -3  -1   7    0.13    0.56
   3  -1   7    0.24    0.50
  -3  -1   7   -0.06    0.33
  -3   1   7    0.06    0.36
   3  -1   7    0.05    0.35
  -3   1   7    0.30    0.20
   3   1   7    0.11    0.41
  -3  -1   7    0.05    0.47
   3   1   7   -0.08    0.40
  -3  -1   7    0.09    0.37
  -4  -1   7    2.65    0.52
   4   1   7    2.98    0.51
  -4  -1   7    3.31    0.63
  -4  -1   7    2.68    0.39
   4   1   7    3.12    0.45
  -4   1   7    3.52    0.44
  -4   1   7    3.33    0.25
   4  -1   7    3.35    0.58
  -4   1   7    4.15    0.56
   4  -1   7    3.16    0.43
  -4  -1   7    3.66    0.43
  -5  -1   7    0.59    0.37
  -5  -1   7    0.81    0.34
  -5   1   7    1.39    0.46
  -5   1   7    0.75    0.22
   5  -1   7    0.31    0.51
  -5  -1   7    0.76    0.57
   5   1   7    0.72    0.40
  -5   1   7    0.88    0.39
   5   1   7    0.70    0.48
   5  -1   7    0.26    0.40
  -5  -1   7    0.78    0.49
  -6   1   7    1.76    0.54
  -6  -1   7    1.07    0.55
   6   1   7    1.05    0.51
   6  -1   7    0.74    0.42
  -6   1   7    1.13    0.23
   6  -1   7    1.05    0.49
  -6  -1   7    1.01    0.37
  -6  -1   7    0.44    0.49
  -6   1   7    0.78    0.42
   6   1   7    1.25    0.38
  -7  -1   7    0.37    0.38
  -7   1   7    0.33    0.46
  -7  -1   7    0.03    0.45
   7  -1   7    0.57    0.54
   7  -1   7    0.13    0.47
   7   1   7    0.34    0.50
   7   1   7    0.35    0.37
  -7   1   7    0.32    0.24
  -7   1   7    0.35    0.39
  -7  -1   7    0.63    0.60
  -8  -1   7    8.60    0.80
   8   1   7    7.72    0.73
   8   1   7    7.74    0.49
  -8   1   7    9.03    0.73
  -8   1   7    8.67    0.40
  -8  -1   7    8.37    0.57
   8  -1   7    7.40    0.64
  -8  -1   7    7.62    0.65
   8  -1   7    8.18    0.69
  -9  -1   7    6.13    0.61
   9  -1   7    6.48    0.68
   9  -1   7    5.07    0.65
  -9  -1   7    5.34    0.52
  -9  -1   7    7.29    0.79
   9   1   7    5.65    0.69
  -9   1   7    5.60    0.37
   9   1   7    5.35    0.44
  -9   1   7    6.67    0.68
 -10  -1   7   68.99    1.45
  10  -1   7   68.09    1.58
  10   1   7   68.71    1.69
 -10  -1   7   70.14    1.71
 -10   1   7   69.15    1.04
 -10   1   7   67.78    1.56
  10  -1   7   70.58    1.63
 -10  -1   7   65.18    1.33
 -11  -1   7   35.56    1.08
  11  -1   7   36.04    1.29
 -11   1   7   38.29    1.26
  11  -1   7   36.40    1.25
 -11   1   7   37.42    0.83
  11   1   7   34.13    1.32
 -11  -1   7   37.21    1.35
 -11  -1   7   36.43    1.06
 -12   1   7  164.28    2.44
  12  -1   7  164.29    2.58
 -12  -1   7  161.52    2.14
 -12   1   7  159.67    1.70
 -12  -1   7  167.57    2.60
  12  -1   7  165.57    2.46
  12   1   7  158.59    2.59
 -13  -1   7   19.45    1.06
  13  -1   7   20.24    1.01
  13   1   7   18.93    1.09
 -13  -1   7   18.07    0.85
 -13   1   7   18.70    0.95
  13  -1   7   18.47    1.09
 -13   1   7   18.53    0.69
 -14   1   7    0.40    0.51
 -14  -1   7    0.42    0.44
  14  -1   7    0.37    0.52
 -14  -1   7    0.45    0.60
  14   1   7    0.20    0.66
  14  -1   7    1.05    0.71
 -14   1   7    0.33    0.35
 -15  -1   7    1.18    0.46
  15  -1   7    1.77    0.55
 -15  -1   7    1.94    0.67
 -15   1   7    1.56    0.42
 -15   1   7    2.59    0.62
  15  -1   7    1.96    0.75
  15   1   7    2.13    0.69
 -16  -1   7   -0.06    0.50
 -16   1   7    0.05    0.41
 -16  -1   7   -0.02    0.57
  16  -1   7    0.03    0.55
 -16   1   7    0.24    0.57
  16   1   7    0.52    0.75
  16  -1   7    0.16    0.78
  17   1   7    0.51    0.72
  17  -1   7    1.41    0.84
 -17  -1   7    0.57    0.52
 -17   1   7    0.38    0.46
 -17  -1   7    0.08    0.63
 -17   1   7    0.65    0.55
  17  -1   7    0.13    0.53
  18   1   7    0.98    0.74
  18  -1   7    0.80    0.84
 -18  -1   7    1.18    0.57
 -18   1   7    0.55    0.49
 -18  -1   7    1.48    0.71
 -18   1   7    0.92    0.57
  18  -1   7    0.36    0.59
 -19  -1   7    1.80    0.60
  19  -1   7    2.25    0.63
 -19  -1   7    1.26    0.71
  19  -1   7    1.13    0.89
  19   1   7    1.69    0.80
 -19   1   7    1.35    0.61
 -19   1   7    1.40    0.53
 -20  -1   7    0.62    0.63
  20   1   7    0.61    0.83
  20  -1   7    1.01    0.60
 -20  -1   7    0.00    0.71
 -20   1   7    0.54    0.55
 -20   1   7    0.03    0.66
  20  -1   7    0.52    0.98
 -21   1   7    2.19    0.71
 -21  -1   7    1.91    0.67
 -21   1   7    2.18    0.66
 -21  -1   7    2.56    0.78
  21  -1   7    2.74    0.67
  21   1   7    2.35    0.87
  21  -1   7    3.07    1.10
 -22  -1   7   42.71    1.67
 -22   1   7   43.36    1.54
 -22   1   7   45.17    1.63
  22  -1   7   44.96    1.61
  22   1   7   46.39    1.98
  22  -1   7   44.05    2.11
 -22  -1   7   46.16    1.76
 -23  -1   7   24.33    1.37
 -23  -1   7   26.11    1.43
  23  -1   7   23.30    1.77
 -23   1   7   23.04    1.26
  23   1   7   25.28    1.59
  23  -1   7   25.02    1.28
  24  -1   7   33.14    2.02
  24   1   7   32.53    1.81
 -24  -1   7   29.40    1.53
 -24  -1   7   29.54    1.54
 -24   1   7   27.97    1.39
 -25  -1   7    0.95    0.84
 -25  -1   7    0.42    0.80
 -25   1   7    0.36    0.72
  25  -1   7    0.16    1.28
  25   1   7    0.31    1.05
  26   1   7    1.49    1.03
 -26  -1   7   -0.31    0.88
 -26   1   7    0.01    0.77
 -26  -1  -7   -0.01    0.93
  26  -1   7   -0.18    1.35
 -26  -1   7    0.25    0.83
 -27  -1   7    0.18    0.93
 -27  -1  -7    0.36    0.95
 -27  -1   7   -0.45    0.89
  27   1   7    0.61    1.04
  27  -1   7   -0.25    1.33
 -27   1   7    0.40    0.77
 -28  -1   7    4.96    1.05
  28   1   7    5.58    1.22
 -28   1   7    3.34    0.87
 -28  -1  -7    5.21    1.08
  28  -1   7    4.62    1.43
 -29  -1   7   -0.32    0.99
  29   1   7    0.93    1.05
 -29   1   7    0.00    0.80
 -29  -1  -7    0.32    0.99
  29  -1   7   -0.58    1.38
 -30   1   7    3.46    0.93
 -31   1   7    0.03    0.89
   0  -1   8    0.31    0.39
   0  -1   8   -0.04    0.57
   0  -1   8    0.10    0.58
   0   1   8    0.13    0.47
   0   1   8    0.19    0.45
   0  -1   8   -0.24    0.39
  -1  -1   8   32.72    1.19
  -1  -1   8   32.48    1.17
   1  -1   8   34.60    1.22
  -1  -1   8   34.95    0.95
  -1   1   8   33.93    0.99
   1  -1   8   33.33    1.15
  -1  -1   8   34.44    0.90
   1  -1   8   32.53    0.89
   1   1   8   32.11    1.01
   1   1   8   32.57    1.00
  -1   1   8   32.02    1.05
  -2   1   8    3.67    0.58
   2   1   8    3.36    0.49
  -2  -1   8    3.68    0.63
   2  -1   8    3.70    0.45
   2  -1   8    2.84    0.63
  -2   1   8    4.20    0.52
  -2  -1   8    3.50    0.45
   2   1   8    3.81    0.54
  -2  -1   8    3.78    0.44
   2  -1   8    4.66    0.64
  -2  -1   8    4.13    0.68
  -3  -1   8   17.79    0.93
  -3   1   8   18.25    0.89
   3  -1   8   19.94    0.76
   3   1   8   18.91    0.83
  -3  -1   8   19.79    0.75
   3   1   8   16.95    0.77
  -3   1   8   19.72    0.80
   3  -1   8   18.32    0.96
  -3  -1   8   19.64    0.72
  -3  -1   8   18.22    0.98
   4  -1   8   23.86    1.05
  -4  -1   8   21.55    0.79
  -4   1   8   21.77    0.95
  -4  -1   8   23.13    0.77
  -4   1   8   21.99    0.53
   4  -1   8   21.82    0.81
  -4  -1   8   22.77    1.09
  -4  -1   8   23.54    1.04
   4   1   8   25.12    0.95
   4   1   8   21.67    0.84
  -4   1   8   23.93    0.87
   5   1   8    3.50    0.49
   5  -1   8    4.21    0.63
  -5  -1   8    4.36    0.71
   5   1   8    4.27    0.59
  -5  -1   8    4.11    0.45
  -5   1   8    4.03    0.53
  -5   1   8    3.93    0.30
   5  -1   8    3.89    0.50
  -5  -1   8    3.95    0.48
  -5   1   8    3.34    0.58
  -5  -1   8    4.07    0.65
   6  -1   8    8.76    0.80
   6   1   8    8.51    0.73
  -6  -1   8    8.77    0.60
   6   1   8    7.57    0.57
  -6   1   8    9.11    0.63
  -6   1   8    8.83    0.72
  -6  -1   8    7.66    0.80
  -6   1   8    8.62    0.38
  -6  -1   8    8.19    0.76
   6  -1   8    8.00    0.62
  -6  -1   8    8.41    0.55
   7   1   8    0.06    0.42
   7  -1   8    0.56    0.63
  -7  -1   8    0.21    0.62
   7  -1   8    0.05    0.47
  -7   1   8    0.46    0.57
  -7   1   8    0.09    0.42
  -7  -1   8   -0.07    0.42
  -7  -1   8    0.29    0.59
  -7   1   8    0.14    0.26
   7   1   8    0.29    0.55
  -8   1   8    0.27    0.59
  -8  -1   8   -0.12    0.55
   8  -1   8    0.29    0.54
   8   1   8   -0.05    0.41
   8  -1   8   -0.23    0.52
  -8   1   8   -0.07    0.26
  -8  -1   8    0.04    0.41
   8   1   8   -0.16    0.53
  -8  -1   8    0.38    0.67
  -9  -1   8    1.78    0.43
   9   1   8    2.24    0.59
   9  -1   8    0.68    0.54
  -9  -1   8    1.69    0.68
  -9  -1   8    1.20    0.56
   9  -1   8    1.46    0.63
  -9   1   8    1.73    0.30
  -9   1   8    2.43    0.58
 -10   1   8    0.32    0.28
  10   1   8   -0.08    0.63
 -10  -1   8    0.84    0.57
  10  -1   8    0.60    0.58
  10  -1   8    0.12    0.58
 -10  -1   8    0.67    0.67
 -10  -1   8    0.24    0.40
 -10   1   8    0.79    0.60
  11  -1   8   29.03    1.19
 -11  -1   8   28.29    1.08
  11   1   8   29.34    1.24
  11  -1   8   28.64    1.18
 -11   1   8   28.77    0.75
 -11  -1   8   30.40    1.28
 -11  -1   8   27.97    0.96
 -11   1   8   31.82    1.21
  12  -1   8    6.72    0.73
 -12   1   8    5.80    0.72
  12   1   8    6.29    0.79
 -12  -1   8    5.85    0.74
  12  -1   8    6.42    0.76
 -12  -1   8    6.14    0.58
 -13  -1   8    0.21    0.43
  13  -1   8    0.21    0.55
 -13  -1   8    0.61    0.64
  13   1   8    0.40    0.63
  13  -1   8    0.06    0.63
 -13   1   8    0.20    0.50
  14  -1   8    3.63    0.65
 -14  -1   8    3.67    0.69
 -14  -1   8    4.05    0.56
  14   1   8    4.05    0.74
 -14   1   8    3.42    0.67
  14  -1   8    3.81    0.77
 -15  -1   8    1.86    0.71
 -15   1   8    2.19    0.61
  15  -1   8    2.57    0.77
  15   1   8    2.27    0.74
  15  -1   8    1.51    0.58
 -15  -1   8    1.40    0.49
  16  -1   8   11.84    0.92
  16  -1   8   13.43    1.11
 -16   1   8   12.55    0.95
 -16  -1   8   13.06    0.99
 -16  -1   8   12.38    0.82
  16   1   8   13.68    1.08
 -17  -1   8   10.80    0.98
  17  -1   8    8.72    0.86
 -17  -1   8    9.49    0.78
 -17   1   8    9.16    0.88
  17   1   8    9.45    1.02
  17  -1   8    9.22    1.08
 -18   1   8    4.88    0.74
  18   1   8    4.51    0.87
 -18  -1   8    4.61    0.83
  18  -1   8    5.34    0.77
  18  -1   8    5.69    0.99
 -18  -1   8    4.05    0.64
  19   1   8   41.56    1.77
  19  -1   8   38.26    1.81
 -19  -1   8   36.75    1.39
 -19   1   8   38.42    1.52
  19  -1   8   36.45    1.48
 -19  -1   8   40.35    1.64
  20  -1   8    0.85    0.94
  20  -1   8    0.62    0.67
 -20   1   8    0.81    0.67
 -20  -1   8    0.91    0.74
 -20  -1   8    0.49    0.61
  20   1   8    0.92    0.81
 -21  -1   8   46.08    1.65
  21   1   8   50.76    2.02
 -21  -1   8   49.08    1.84
 -21   1   8   49.21    1.72
  21  -1   8   50.08    2.16
  21  -1   8   49.92    1.75
 -22  -1   8    5.31    0.82
  22   1   8    6.07    1.11
 -22  -1   8    6.46    0.95
  22  -1   8    6.13    1.19
 -22   1   8    7.21    0.90
  22  -1   8    5.88    0.85
 -23  -1   8    1.92    0.86
 -23  -1   8    1.53    0.78
 -23   1   8    2.18    0.82
  23  -1   8    1.25    0.75
  23  -1   8    0.95    1.05
  23   1   8    1.95    0.99
 -24   1   8    0.28    0.79
 -24  -1   8    0.33    0.80
  24  -1   8    1.60    0.77
 -24  -1   8    0.61    0.90
  24  -1   8    1.21    1.14
  24   1   8    0.68    1.00
 -25  -1   8    6.11    0.99
 -25  -1   8    7.19    1.11
  25  -1   8    8.15    1.34
 -25   1   8    5.44    0.91
  25   1   8    5.93    1.18
 -26  -1   8    2.64    0.91
  26   1   8    2.14    1.14
 -26   1   8    2.46    0.82
  26  -1   8    2.21    1.20
 -26  -1   8    2.73    0.96
 -27  -1   8   -0.15    0.93
 -27  -1   8    0.84    0.89
 -27  -1  -8    1.30    1.01
 -27   1   8    1.12    0.81
  27   1   8    1.45    1.11
  27  -1   8    1.79    1.18
 -28   1   8    0.86    0.83
 -28  -1  -8    0.21    0.96
 -28  -1   8   -0.25    0.99
  28  -1   8    1.21    1.20
 -29   1   8    0.36    0.92
 -29  -1  -8    0.93    0.98
 -29  -1   8    0.02    1.01
   0  -1   9   72.86    1.83
   0  -1   9   68.15    1.70
   0   1   9   66.06    1.52
   0  -1   9   69.00    1.35
   0  -1   9   69.49    1.33
   0   1   9   71.72    1.50
  -1   1   9    0.65    0.54
  -1  -1   9    0.94    0.43
  -1  -1   9    0.26    0.65
   1  -1   9    0.77    0.62
   1  -1   9    0.79    0.63
   1   1   9    0.61    0.45
  -1  -1   9    0.29    0.41
   1   1   9    0.91    0.55
  -1  -1   9    0.65    0.67
   1  -1   9    0.70    0.42
  -1   1   9    0.72    0.45
  -2  -1   9   -0.25    0.63
  -2  -1   9   -0.24    0.41
  -2  -1   9    0.35    0.66
   2  -1   9    0.44    0.65
  -2  -1   9    0.06    0.41
  -2   1   9    0.00    0.45
   2  -1   9    0.14    0.41
   2   1   9    0.30    0.50
   2  -1   9    0.37    0.68
  -2   1   9    0.08    0.55
   2   1   9    0.18    0.47
  -3   1   9    0.70    0.57
   3   1   9    0.73    0.48
   3  -1   9    0.78    0.63
  -3   1   9    0.95    0.46
  -3  -1   9    0.99    0.67
   3   1   9    1.25    0.52
   3  -1   9    0.82    0.42
  -3  -1   9    0.84    0.42
  -3  -1   9    1.29    0.68
  -3  -1   9    0.85    0.43
  -4   1   9    0.21    0.58
  -4  -1   9    0.11    0.62
   4   1   9    0.34    0.46
  -4  -1   9    0.63    0.64
  -4  -1   9    0.21    0.41
  -4  -1   9    0.85    0.43
   4   1   9    0.67    0.48
   4  -1   9    0.60    0.58
  -4   1   9    0.40    0.46
   4  -1   9    0.23    0.43
   5   1   9    1.34    0.55
  -5  -1   9    1.70    0.64
   5  -1   9    1.66    0.61
  -5  -1   9    1.54    0.70
  -5  -1   9    1.92    0.44
  -5   1   9    1.95    0.50
   5   1   9    1.84    0.47
   5  -1   9    1.17    0.45
  -5   1   9    1.97    0.61
  -5  -1   9    1.41    0.42
   6  -1   9    2.68    0.64
  -6  -1   9    2.40    0.45
  -6  -1   9    2.74    0.70
  -6  -1   9    2.68    0.67
  -6  -1   9    2.60    0.45
  -6   1   9    2.38    0.50
  -6   1   9    2.86    0.64
   6   1   9    1.80    0.47
   6   1   9    2.80    0.59
   6  -1   9    1.64    0.47
  -7  -1   9    6.20    0.75
  -7  -1   9    5.59    0.54
   7  -1   9    5.54    0.75
   7  -1   9    5.41    0.58
  -7   1   9    6.08    0.72
   7   1   9    5.37    0.65
  -7   1   9    5.41    0.59
  -7  -1   9    6.18    0.81
  -8  -1   9    0.29    0.42
   8   1   9    0.40    0.54
  -8  -1   9    0.07    0.67
  -8   1   9    0.66    0.46
  -8  -1   9    0.30    0.58
   8  -1   9   -0.04    0.48
   8  -1   9    0.05    0.64
  -8   1   9    0.20    0.59
  -9  -1   9    0.55    0.39
   9   1   9    0.37    0.57
   9  -1   9    1.69    0.58
  -9  -1   9    0.69    0.62
  -9  -1   9    0.49    0.62
   9  -1   9    0.27    0.51
  -9   1   9    0.63    0.55
  10  -1   9   18.91    1.09
 -10  -1   9   15.32    0.76
  10   1   9   15.94    0.96
  10  -1   9   14.82    0.89
 -10  -1   9   16.47    1.06
 -10   1   9   16.41    0.98
 -10  -1   9   15.78    0.97
 -11  -1   9    0.45    0.41
 -11   1   9    0.24    0.60
  11   1   9    0.67    0.62
 -11  -1   9    0.34    0.68
  11  -1   9    0.98    0.61
  11  -1   9    0.38    0.58
  12  -1   9   16.05    1.03
  12   1   9   14.09    0.99
 -12  -1   9   14.69    1.05
 -12   1   9   13.93    0.98
  12  -1   9   13.56    0.93
 -12  -1   9   13.83    0.76
 -13  -1   9    1.24    0.46
 -13   1   9    2.77    0.66
 -13  -1   9    2.27    0.67
  13   1   9    1.62    0.66
  13  -1   9    1.36    0.66
  13  -1   9    2.19    0.68
 -14  -1   9    1.51    0.47
  14  -1   9    1.51    0.71
  14  -1   9    1.47    0.69
  14   1   9    1.58    0.69
 -14  -1   9    2.27    0.75
 -14   1   9    1.27    0.67
  15   1   9    0.27    0.75
 -15  -1   9    0.03    0.47
  15  -1   9   -0.01    0.65
 -15  -1   9    0.05    0.65
 -15   1   9    0.84    0.66
  15  -1   9    0.46    0.71
 -16  -1   9    2.22    0.55
  16  -1   9    2.22    0.72
 -16  -1   9    2.47    0.78
  16   1   9    2.12    0.77
 -16   1   9    2.48    0.67
  16  -1   9    1.83    0.78
  17   1   9    1.89    0.78
 -17   1   9    2.47    0.75
  17  -1   9    2.61    0.72
 -17  -1   9    2.56    0.59
 -17  -1   9    2.11    0.71
  17  -1   9    1.54    0.85
 -18  -1   9    0.07    0.55
  18  -1   9    0.54    0.65
 -18  -1   9   -0.19    0.72
  18  -1   9    0.13    0.84
  18   1   9   -0.05    0.77
 -18   1   9    0.75    0.65
 -19   1   9    3.28    0.78
 -19  -1   9    1.73    0.61
  19  -1   9    2.59    0.76
 -19  -1   9    1.92    0.83
  19  -1   9    1.29    0.90
  19   1   9    1.60    0.81
  20  -1   9    1.46    0.72
 -20  -1   9    1.63    0.87
 -20  -1   9    1.77    0.65
 -20   1   9    1.96    0.73
  20   1   9    2.11    0.89
  20  -1   9    2.88    1.01
 -21  -1   9    1.99    0.70
  21  -1   9    1.62    0.74
  21  -1   9    1.84    0.99
 -21  -1   9    2.63    0.91
  21   1   9    2.88    0.95
 -21   1   9    2.23    0.78
 -22  -1   9    4.74    1.02
 -22   1   9    5.99    0.96
 -22  -1   9    4.84    0.80
  22  -1   9    6.63    1.18
  22   1   9    6.05    1.09
  22  -1   9    5.17    0.92
 -23  -1   9    0.63    0.76
  23  -1   9    1.09    0.79
 -23  -1   9    1.26    0.91
  23   1   9    1.99    1.03
 -23   1   9    0.78    0.77
  23  -1   9    0.99    1.12
 -24  -1   9    1.74    0.80
  24  -1   9    3.36    0.88
  24   1   9    2.43    1.05
 -24   1   9    2.23    0.86
 -24  -1   9    3.67    1.02
  24  -1   9    2.45    1.15
 -25  -1   9    7.24    1.16
 -25   1   9    5.42    1.00
  25   1   9    8.27    1.27
  25  -1   9    6.20    1.35
 -25  -1   9    6.09    1.00
 -26  -1   9    0.98    0.89
 -26   1   9    0.69    0.80
 -26  -1   9    0.89    0.96
  26   1   9    0.74    1.06
  26  -1   9    1.71    1.20
  27  -1   9    1.85    1.19
 -27  -1   9    2.56    1.02
 -27  -1  -9    4.49    1.11
 -27  -1   9    1.71    0.92
 -27   1   9    3.25    0.91
 -28  -1   9    3.02    0.96
 -28  -1  -9    3.74    1.08
   0   1  10   -0.06    0.49
   0  -1  10    0.45    0.65
   0   1  10    0.17    0.50
   0  -1  10   -0.21    0.41
   0  -1  10    0.15    0.66
   1  -1  10   12.96    1.00
  -1   1  10   11.85    0.83
  -1  -1  10   12.68    0.97
   1  -1  10   14.27    0.96
  -1  -1  10   12.39    0.70
  -1  -1  10   13.61    1.00
   1  -1  10   12.45    0.70
   1   1  10   12.11    0.76
  -1  -1  10   12.31    0.70
  -1   1  10   12.33    0.76
   1   1  10   11.06    0.80
   2  -1  10    0.95    0.64
  -2  -1  10    0.90    0.67
   2  -1  10    0.92    0.62
  -2  -1  10    1.09    0.66
  -2  -1  10    0.80    0.43
  -2   1  10    1.75    0.52
   2  -1  10    1.03    0.43
  -2  -1  10    1.14    0.42
   2   1  10    1.23    0.52
  -2   1  10    1.71    0.58
   2   1  10    0.92    0.54
   3   1  10    2.18    0.51
   3  -1  10    2.39    0.67
  -3  -1  10    3.28    0.71
  -3  -1  10    2.22    0.46
  -3   1  10    2.90    0.53
   3  -1  10    2.21    0.47
   3   1  10    2.15    0.55
  -3   1  10    2.16    0.60
  -3  -1  10    2.07    0.46
  -3  -1  10    2.00    0.69
  -4  -1  10    7.66    0.87
   4   1  10    6.46    0.63
   4  -1  10    6.97    0.86
   4   1  10    6.90    0.67
   4  -1  10    5.56    0.57
  -4  -1  10    7.78    0.60
  -4   1  10    7.42    0.64
  -4  -1  10    7.10    0.59
  -4  -1  10    7.32    0.88
  -4   1  10    7.09    0.75
  -5  -1  10    6.50    0.84
   5  -1  10    6.72    0.87
  -5  -1  10    7.11    0.85
  -5   1  10    6.67    0.65
  -5  -1  10    6.89    0.59
   5   1  10    6.96    0.71
   5  -1  10    7.20    0.63
  -5   1  10    6.66    0.74
   5   1  10    6.55    0.64
  -5  -1  10    7.19    0.59
   6   1  10    1.44    0.56
  -6   1  10    1.71    0.62
  -6  -1  10    1.53    0.69
   6  -1  10    1.66    0.72
  -6  -1  10    1.23    0.67
   6  -1  10    1.43    0.46
  -6  -1  10    1.45    0.45
  -6  -1  10    1.24    0.43
  -6   1  10    1.30    0.46
   7  -1  10    4.61    0.80
  -7  -1  10    4.10    0.53
  -7   1  10    4.60    0.73
  -7   1  10    4.50    0.58
   7   1  10    4.24    0.65
  -7  -1  10    3.82    0.75
  -7  -1  10    4.30    0.78
   7  -1  10    3.79    0.56
  -8  -1  10    2.07    0.72
  -8  -1  10    1.45    0.71
  -8   1  10    1.90    0.66
   8   1  10    2.31    0.60
  -8   1  10    2.14    0.53
   8  -1  10    1.85    0.54
   8  -1  10    2.30    0.68
  -8  -1  10    1.82    0.47
  -9  -1  10    3.07    0.74
   9   1  10    3.62    0.69
   9  -1  10    3.70    0.75
  -9  -1  10    3.89    0.79
  -9   1  10    3.29    0.73
   9  -1  10    3.96    0.63
  -9  -1  10    2.86    0.50
  10  -1  10   10.39    1.00
 -10  -1  10    9.39    0.96
  10  -1  10    9.36    0.79
  10   1  10   10.29    0.87
 -10   1  10   10.20    0.94
 -10  -1  10    8.73    0.66
 -11  -1  10    2.71    0.51
  11  -1  10    2.87    0.73
 -11   1  10    2.76    0.72
  11   1  10    2.12    0.67
  11  -1  10    2.16    0.62
 -11  -1  10    2.60    0.79
  12  -1  10   10.27    1.00
 -12  -1  10    9.32    0.69
  12   1  10    9.68    0.92
 -12  -1  10    9.30    1.01
  12  -1  10    8.78    0.84
 -12   1  10    9.45    0.92
  13  -1  10    3.94    0.80
  13   1  10    2.96    0.74
 -13  -1  10    3.12    0.77
 -13   1  10    3.02    0.71
 -13  -1  10    3.63    0.55
  13  -1  10    3.04    0.71
 -14   1  10   15.55    1.09
  14  -1  10   14.57    1.12
  14  -1  10   12.57    1.01
 -14  -1  10   12.65    0.79
  14   1  10   13.78    1.09
 -14  -1  10   13.44    1.11
 -15   1  10    6.23    0.89
  15  -1  10    5.95    0.87
 -15  -1  10    7.84    0.95
  15   1  10    7.30    0.92
  15  -1  10    6.89    0.91
 -15  -1  10    5.88    0.65
  16  -1  10   18.99    1.23
 -16  -1  10   22.36    1.36
  16   1  10   19.02    1.28
  16  -1  10   20.81    1.30
 -16  -1  10   19.76    0.99
 -16   1  10   22.96    1.30
 -17  -1  10    2.72    0.78
  17  -1  10    1.39    0.71
 -17   1  10    3.14    0.75
  17   1  10    2.46    0.80
 -17  -1  10    2.56    0.58
  17  -1  10    2.32    0.83
 -18  -1  10   -0.09    0.58
 -18   1  10    0.73    0.78
  18  -1  10   -0.60    0.85
 -18  -1  10    0.18    0.87
  18   1  10    0.35    0.87
  18  -1  10   -0.27    0.72
  19  -1  10    0.55    0.93
  19  -1  10   -0.19    0.81
 -19  -1  10    0.21    0.87
 -19  -1  10    0.77    0.59
  19   1  10    0.28    0.93
 -19   1  10    1.06    0.75
 -20  -1  10    0.57    0.63
  20  -1  10    0.44    0.84
 -20  -1  10    0.93    0.83
 -20   1  10    0.67    0.81
  20   1  10    0.25    0.95
  20  -1  10    0.44    0.96
 -21  -1  10    1.90    0.69
  21  -1  10    1.81    0.82
 -21  -1  10    2.25    0.94
 -21   1  10    1.62    0.80
  21   1  10    2.64    1.02
  21  -1  10    1.97    1.01
 -22  -1  10   -0.11    0.71
  22  -1  10    0.09    0.84
 -22  -1  10    0.49    0.89
 -22   1  10    0.18    0.86
  22  -1  10    0.15    1.05
  22   1  10    0.88    1.04
 -23  -1  10    0.14    0.76
 -23  -1  10    0.69    0.88
  23   1  10    0.40    0.99
 -23   1  10    0.79    0.82
  23  -1  10   -0.35    1.11
  23  -1  10    0.88    0.82
  24  -1  10    0.31    0.88
 -24  -1  10    0.61    0.80
 -24  -1  10    1.20    0.93
 -24   1  10    0.81    0.89
  24   1  10   -0.05    1.07
  24  -1  10    1.26    1.11
 -25  -1  10    1.23    0.94
 -25   1  10    0.89    0.85
  25  -1  10    1.35    1.17
 -25  -1  10    0.44    0.82
 -26  -1  10    0.23    0.83
 -27  -1  10    0.81    0.92
   0   1  11   22.10    1.01
   0  -1  11   22.40    1.24
   0  -1  11   18.93    0.88
   0  -1  11   22.60    1.32
   0   1  11   20.18    1.08
  -1  -1  11    1.80    0.78
   1  -1  11    1.95    0.74
  -1  -1  11    1.93    0.75
  -1  -1  11    1.46    0.49
   1  -1  11    1.66    0.50
  -1   1  11    2.02    0.55
   1   1  11    2.08    0.56
   1   1  11    1.14    0.62
  -1   1  11    2.39    0.66
   1  -1  11    1.82    0.77
  -2  -1  11   11.57    1.07
   2  -1  11   11.29    1.07
   2   1  11   12.28    0.86
  -2  -1  11   11.02    0.71
  -2  -1  11   10.35    0.71
  -2   1  11    9.44    0.76
  -2  -1  11   10.28    1.00
   2   1  11    9.91    0.83
  -2   1  11    9.33    0.85
   2  -1  11    9.95    0.70
   3  -1  11    6.80    0.94
  -3  -1  11    5.43    0.87
  -3  -1  11    6.45    0.61
   3  -1  11    5.14    0.60
  -3   1  11    6.02    0.65
  -3  -1  11    6.19    0.61
   3   1  11    6.07    0.70
  -3  -1  11    6.41    0.91
   3   1  11    5.34    0.70
  -3   1  11    5.29    0.76
  -4   1  11    1.71    0.66
   4   1  11    2.05    0.59
  -4  -1  11    1.30    0.75
   4  -1  11    2.25    0.75
  -4   1  11    1.44    0.54
  -4  -1  11    1.21    0.74
   4  -1  11    1.43    0.50
  -4  -1  11    1.36    0.47
  -4  -1  11    1.50    0.48
  -5  -1  11  102.79    2.47
   5  -1  11  105.54    2.58
  -5  -1  11   98.58    1.79
  -5  -1  11   98.86    2.38
  -5  -1  11   98.81    1.78
  -5   1  11   98.64    1.95
   5  -1  11   93.73    1.82
   5   1  11  100.96    2.09
  -5   1  11   97.88    2.23
  -6  -1  11    1.74    0.49
   6  -1  11    2.49    0.78
  -6   1  11    2.06    0.53
  -6  -1  11    2.08    0.80
  -6  -1  11    1.57    0.75
  -6  -1  11    2.33    0.52
   6  -1  11    1.33    0.52
   6   1  11    2.54    0.60
  -6   1  11    1.98    0.67
   7  -1  11   11.82    1.06
  -7  -1  11   10.46    0.72
  -7   1  11   11.35    0.80
  -7  -1  11   10.72    1.03
   7   1  11   10.73    0.87
   7  -1  11    9.78    0.76
  -7   1  11   10.61    0.95
  -7  -1  11   10.36    1.03
   8   1  11    0.00    0.62
   8  -1  11    0.84    0.70
  -8  -1  11    0.04    0.74
   8  -1  11    0.45    0.53
  -8   1  11    0.37    0.73
  -8   1  11    0.29    0.54
  -8  -1  11    0.31    0.47
   9  -1  11    0.68    0.74
  -9  -1  11    0.26    0.48
  -9  -1  11    0.48    0.74
   9   1  11    0.70    0.60
  -9   1  11    0.56    0.69
   9  -1  11    0.75    0.55
  10  -1  11    5.25    0.93
 -10  -1  11    3.51    0.55
 -10  -1  11    4.40    0.87
 -10   1  11    5.06    0.80
  10   1  11    3.70    0.72
  10  -1  11    3.63    0.66
 -11   1  11    0.92    0.66
  11  -1  11    0.70    0.75
 -11  -1  11    1.49    0.74
  11   1  11    1.21    0.67
  11  -1  11    0.42    0.58
 -11  -1  11    0.98    0.47
  12  -1  11   34.97    1.66
  12   1  11   31.81    1.45
  12  -1  11   30.09    1.33
 -12  -1  11   30.23    1.12
 -12   1  11   32.03    1.48
 -12  -1  11   34.54    1.59
 -13  -1  11    3.35    0.59
 -13   1  11    3.95    0.82
 -13  -1  11    3.59    0.86
  13  -1  11    3.85    0.84
  13   1  11    3.16    0.77
  13  -1  11    2.64    0.72
 -14  -1  11    0.19    0.50
  14  -1  11    0.32    0.74
 -14  -1  11    0.09    0.83
 -14   1  11    0.18    0.73
  14   1  11   -0.16    0.67
  14  -1  11    0.12    0.70
 -15  -1  11    0.32    0.50
  15  -1  11    0.03    0.83
 -15   1  11    0.41    0.78
  15  -1  11    0.39    0.74
 -15  -1  11    0.93    0.75
  15   1  11    0.41    0.73
 -16  -1  11   -0.04    0.54
  16  -1  11    0.25    0.78
  16  -1  11    0.35    0.86
  16   1  11    0.34    0.80
 -16  -1  11    1.38    0.86
 -16   1  11    0.76    0.79
  17  -1  11   50.35    2.01
 -17   1  11   55.67    2.01
 -17  -1  11   52.57    2.03
  17  -1  11   52.32    1.97
 -17  -1  11   50.19    1.53
  17   1  11   47.31    1.91
 -18  -1  11    0.51    0.57
  18   1  11    1.12    0.83
 -18  -1  11    0.82    0.92
 -18   1  11    0.53    0.79
  18  -1  11    0.68    0.85
  18  -1  11    0.57    0.89
 -19  -1  11    2.02    0.64
  19  -1  11    2.08    0.93
 -19  -1  11    1.82    0.98
  19   1  11    2.69    0.93
 -19   1  11    4.05    0.95
  19  -1  11    2.06    0.97
 -20  -1  11    0.30    0.63
  20  -1  11    0.68    0.98
 -20  -1  11    0.62    0.91
  20  -1  11    0.03    0.89
 -20   1  11   -0.10    0.95
  20   1  11    0.43    0.95
 -21  -1  11    0.83    0.67
  21  -1  11    0.01    0.90
 -21  -1  11    0.74    0.92
 -21   1  11    0.08    0.85
  21  -1  11    0.63    1.02
  21   1  11    0.80    0.94
  22  -1  11    7.96    1.28
 -22  -1  11   11.14    1.29
 -22  -1  11   11.59    1.04
  22   1  11   12.08    1.33
 -22   1  11   13.36    1.27
  22  -1  11    9.17    1.18
 -23  -1  11    0.67    0.72
 -23  -1  11    1.37    1.05
 -23   1  11    0.85    0.89
  23   1  11    0.35    1.01
  23  -1  11    0.53    1.11
  23  -1  11    0.50    0.96
 -24  -1  11    4.52    0.90
  24  -1  11    3.70    1.21
   0  -1  12   -0.09    0.81
   0  -1  12   -0.08    0.51
   0   1  12    0.16    0.68
   0   1  12   -0.14    0.58
  -1  -1  12   15.50    1.23
   1  -1  12   15.10    1.27
  -1  -1  12   17.88    1.25
  -1   1  12   14.64    1.05
   1  -1  12   14.43    0.85
  -1  -1  12   15.50    0.86
  -1   1  12   15.26    0.95
   1   1  12   16.08    0.99
   1   1  12   15.53    1.03
  -2  -1  12    2.47    0.84
  -2  -1  12    1.97    0.87
   2  -1  12    3.20    0.84
  -2  -1  12    2.04    0.54
  -2   1  12    2.31    0.60
   2  -1  12    2.41    0.55
  -2   1  12    2.33    0.71
   2   1  12    2.74    0.65
  -3  -1  12    2.39    0.84
   3  -1  12    3.73    0.93
  -3  -1  12    2.97    0.88
  -3   1  12    3.47    0.63
  -3  -1  12    2.99    0.56
   3  -1  12    2.27    0.55
   3   1  12    2.59    0.62
  -3   1  12    3.37    0.76
  -4   1  12   -0.23    0.54
  -4  -1  12    0.97    0.80
   4  -1  12    0.30    0.79
  -4  -1  12    0.29    0.83
   4  -1  12    0.06    0.50
  -4  -1  12    0.27    0.49
  -4  -1  12   -0.18    0.47
   4   1  12    0.00    0.57
  -4   1  12    0.48    0.69
  -5  -1  12    0.70    0.48
   5  -1  12    1.94    0.82
  -5  -1  12    0.43    0.80
  -5  -1  12    0.82    0.82
  -5  -1  12    0.82    0.49
  -5   1  12    1.06    0.70
   5  -1  12    0.84    0.52
   5   1  12    0.71    0.59
  -5   1  12    0.79    0.53
   6  -1  12    9.15    1.05
  -6   1  12    9.07    0.78
  -6   1  12    8.04    0.92
  -6  -1  12    8.45    0.69
   6  -1  12    7.64    0.73
   6   1  12    8.58    0.82
  -6  -1  12    7.94    1.03
  -7  -1  12    0.60    0.48
   7  -1  12    1.07    0.76
   7   1  12    0.97    0.64
  -7   1  12    1.16    0.55
  -7   1  12    0.96    0.70
   7  -1  12    0.65    0.54
  -7  -1  12    1.47    0.80
  -8  -1  12    5.53    0.97
  -8   1  12    4.92    0.88
  -8  -1  12    5.65    0.63
   8  -1  12    4.96    0.68
   8   1  12    5.26    0.76
   8  -1  12    6.45    0.96
   9  -1  12    2.74    0.64
   9  -1  12    2.89    0.85
  -9  -1  12    3.49    0.91
  -9   1  12    3.22    0.81
   9   1  12    1.80    0.68
  -9  -1  12    2.02    0.54
  10  -1  12   16.17    1.33
 -10   1  12   13.92    1.13
 -10  -1  12   15.94    1.27
 -10  -1  12   14.58    0.85
  10  -1  12   13.52    0.96
  10   1  12   15.03    1.10
  11  -1  12    3.22    0.70
 -11  -1  12    3.82    0.98
 -11   1  12    3.28    0.86
  11  -1  12    5.05    0.98
  11   1  12    2.88    0.77
 -11  -1  12    3.79    0.60
  12  -1  12    3.62    0.93
 -12  -1  12    3.79    0.99
  12  -1  12    3.24    0.74
 -12   1  12    3.90    0.91
  12   1  12    3.27    0.81
 -12  -1  12    3.32    0.58
  13  -1  12    0.74    0.87
 -13  -1  12    0.09    0.54
 -13  -1  12    0.10    0.84
 -13   1  12    0.55    0.81
  13   1  12   -0.01    0.76
  13  -1  12   -0.23    0.71
 -14  -1  12    0.91    0.89
 -14   1  12    1.15    0.85
  14   1  12    1.32    0.77
  14  -1  12    1.48    0.75
  14  -1  12    1.54    0.90
 -14  -1  12    1.34    0.58
 -15  -1  12    0.26    0.59
 -15   1  12   -0.40    0.85
  15  -1  12    0.77    0.86
 -15  -1  12    0.58    0.95
  15   1  12   -0.10    0.84
  15  -1  12   -0.13    0.80
  16  -1  12   10.98    1.21
 -16   1  12   10.89    1.21
  16  -1  12   10.58    1.11
 -16  -1  12   12.14    1.23
  16   1  12   11.88    1.15
 -16  -1  12   10.16    0.84
 -17  -1  12    0.36    0.61
  17  -1  12    0.73    0.98
 -17  -1  12    0.47    0.99
  17   1  12    0.48    0.92
 -17   1  12   -0.33    0.94
  17  -1  12    0.01    0.89
  18  -1  12    2.09    0.93
 -18  -1  12    2.02    0.92
 -18   1  12    1.11    0.97
 -18  -1  12    1.48    0.63
  18   1  12    0.97    0.88
  18  -1  12    0.85    0.88
  19  -1  12    3.29    1.00
 -19  -1  12    2.21    1.04
 -19   1  12    3.06    0.97
  19  -1  12    2.64    0.98
  19   1  12    1.99    0.91
 -20  -1  12    0.56    1.01
 -20   1  12    1.08    0.90
  20  -1  12    0.27    1.02
  20   1  12    1.13    0.92
  20  -1  12    0.98    0.94
  21  -1  12    8.47    1.24
  21  -1  12   11.49    1.30
  22  -1  12    0.69    1.10
   0   1  13   38.75    1.45
   0  -1  13   35.46    1.27
   0  -1  13   37.89    1.88
  -1  -1  13    2.69    0.95
   1  -1  13    2.88    0.96
  -1   1  13    1.65    0.61
  -1  -1  13    1.39    0.54
  -1   1  13    1.26    0.77
   1  -1  13    1.33    0.54
   1   1  13    1.96    0.66
  -2  -1  13   -0.19    0.53
   2  -1  13    0.02    0.86
  -2   1  13    0.25    0.60
   2  -1  13   -0.15    0.54
  -2   1  13    0.13    0.74
   2   1  13   -0.21    0.61
  -2  -1  13    0.12    0.89
   3  -1  13    0.83    0.95
  -3  -1  13   -0.08    0.89
   3  -1  13   -0.37    0.56
  -3  -1  13    0.43    0.52
  -3   1  13    0.29    0.80
  -3   1  13    0.34    0.60
   3   1  13    0.13    0.64
  -4  -1  13    0.82    0.54
   4  -1  13    0.96    0.90
  -4  -1  13    1.17    0.90
  -4   1  13    0.81    0.61
   4  -1  13    0.29    0.59
   4   1  13    1.68    0.69
  -4   1  13    0.48    0.78
  -5   1  13   27.98    1.47
   5  -1  13   28.48    1.22
  -5  -1  13   27.77    1.61
  -5  -1  13   30.34    1.20
  -5   1  13   30.98    1.32
  -5  -1  13   29.12    1.13
   5   1  13   30.12    1.36
   6  -1  13   23.71    1.57
  -6   1  13   23.82    1.20
  -6   1  13   19.20    1.31
   6  -1  13   22.20    1.11
  -6  -1  13   22.05    1.48
  -6  -1  13   21.80    1.01
   6   1  13   21.79    1.22
   7  -1  13    9.38    1.20
   7   1  13   10.02    0.97
  -7  -1  13    8.46    1.15
  -7  -1  13    9.32    0.77
  -7   1  13    9.52    1.05
  -7   1  13   10.15    0.90
   7  -1  13    8.41    0.80
  -8  -1  13    2.32    0.59
   8  -1  13    3.33    0.97
  -8  -1  13    2.70    0.97
  -8   1  13    3.13    0.88
   8  -1  13    2.35    0.64
   8   1  13    2.81    0.74
   9  -1  13    0.56    0.89
  -9  -1  13    0.06    0.94
  -9  -1  13   -0.02    0.54
   9   1  13    0.52    0.69
  -9   1  13    0.36    0.83
   9  -1  13    0.43    0.61
  10   1  13    3.46    0.81
  10  -1  13    2.76    0.96
 -10  -1  13    2.99    1.01
  10  -1  13    2.32    0.66
 -10   1  13    2.41    0.90
 -10  -1  13    2.04    0.60
  11  -1  13    1.94    1.01
 -11  -1  13    1.92    1.01
 -11   1  13    2.71    0.90
  11  -1  13    1.64    0.70
  11   1  13    1.01    0.72
  12  -1  13    8.85    1.17
 -12   1  13    8.91    1.12
  12   1  13    8.44    1.00
  12  -1  13    7.74    0.93
 -12  -1  13    9.16    1.22
  13  -1  13    0.46    1.01
 -13  -1  13    1.37    0.97
  13  -1  13    0.29    0.76
  13   1  13    0.42    0.81
 -13   1  13    0.71    0.90
  14  -1  13    4.77    1.06
 -14  -1  13    5.22    1.08
 -14   1  13    5.01    1.05
  14   1  13    4.43    0.93
  14  -1  13    4.81    0.89
  15  -1  13    5.17    1.13
 -15  -1  13    6.58    1.14
  15   1  13    5.72    1.02
 -15   1  13    6.60    1.13
  15  -1  13    5.28    0.95
  16   1  13   14.31    1.27
 -16  -1  13   15.16    1.45
 -16   1  13   12.79    1.33
  16  -1  13   14.04    1.25
  16  -1  13   14.29    1.38
  17  -1  13   10.56    1.18
  17   1  13   10.26    1.22
 -17   1  13   10.97    1.30
 -17  -1  13   11.46    1.33
  17  -1  13   11.55    1.31
 -18  -1  13    0.28    1.06
  18  -1  13    0.55    0.93
  18  -1  13   -0.31    1.02
  19  -1  13    3.04    1.00
   0  -1  14    0.22    0.61
   0   1  14   -0.20    0.65
   1  -1  14    0.55    0.60
  -1  -1  14    1.05    0.63
   1   1  14    0.34    0.70
  -1   1  14    0.51    0.68
   2   1  14    2.10    0.69
  -2   1  14    2.68    0.71
  -2  -1  14    3.18    0.69
   2  -1  14    2.35    0.65
  -3  -1  14    0.15    0.63
  -3   1  14   -0.06    0.86
  -3   1  14    0.20    0.64
   3  -1  14   -0.29    0.63
   3   1  14   -0.02    0.71
   3  -1  14    0.01    1.07
  -4   1  14   -0.51    0.89
  -4   1  14   -0.30    0.68
  -4  -1  14    0.35    0.62
   4   1  14   -0.48    0.69
   4  -1  14    0.15    0.64
   4  -1  14    0.98    0.98
  -5  -1  14    0.37    1.04
  -5   1  14   -0.05    0.93
  -5  -1  14    0.16    0.61
   5  -1  14    0.35    0.63
   5   1  14    0.20    0.73
  -5   1  14    0.57    0.67
   5  -1  14    0.93    0.99
  -6  -1  14    1.63    1.05
  -6   1  14    1.43    0.66
  -6   1  14    0.09    0.91
   6   1  14    0.07    0.77
   6  -1  14    0.35    0.66
   6  -1  14    1.31    1.04
   7   1  14    1.64    0.77
   7  -1  14    0.87    1.10
  -7  -1  14    0.87    1.01
  -7   1  14    1.53    0.91
   7  -1  14    0.85    0.68
   8  -1  14    1.24    1.06
   8  -1  14    1.45    0.65
  -8  -1  14    0.80    1.04
   8   1  14    0.60    0.74
  -8   1  14    0.71    0.93
  -9  -1  14    0.48    1.06
  -9   1  14    1.11    0.93
   9  -1  14    0.78    0.66
   9   1  14    0.82    0.74
   9  -1  14    0.20    1.10
 -10   1  14    4.77    1.08
 -10  -1  14    6.96    1.18
  10   1  14    8.29    1.02
  10  -1  14    5.95    0.84
  10  -1  14    5.73    1.19
 -11   1  14    0.97    0.97
 -11  -1  14    1.41    1.06
  11  -1  14    1.09    0.73
  11   1  14    0.93    0.84
  11  -1  14    0.79    0.98
  12  -1  14    0.31    0.77
 -12  -1  14    0.56    1.06
  12   1  14    0.62    0.85
 -12   1  14    0.16    1.04
  12  -1  14    0.67    1.09
 -13   1  14    0.06    0.96
 -13  -1  14    0.26    1.03
  13   1  14    0.37    0.83
  13  -1  14    0.20    0.81
  13  -1  14    0.60    0.99
 -14   1  14    2.12    1.02
  14   1  14    1.45    0.93
  14  -1  14    1.78    0.80
 -14  -1  14    1.91    1.04
 -15  -1  14    0.58    1.07
  15  -1  14    0.61    0.82
  16  -1  14    0.94    0.85
  17  -1  14    0.78    0.92
   0  -1  15    3.93    0.75
   0   1  15    3.29    0.80
   1  -1  15    0.54    0.65
  -1  -1  15    0.97    0.65
  -1   1  15    0.95    0.75
   1   1  15    1.05    0.78
  -2  -1  15    0.29    0.68
  -2   1  15    0.32    0.73
   2  -1  15    0.07    0.67
   2   1  15   -0.24    0.76
   3   1  15    0.73    0.74
   3  -1  15   -0.07    0.68
  -3  -1  15    0.12    0.66
  -3   1  15   -0.05    0.74
  -4   1  15    0.73    0.69
  -4  -1  15   -0.02    0.68
   4  -1  15   -0.28    0.71
   4   1  15   -0.02    0.81
  -5   1  15   11.32    1.03
   5   1  15   11.27    1.11
   5  -1  15    8.66    0.93
   6   1  15   10.65    1.10
  -6   1  15   10.87    1.01
   6  -1  15    9.03    0.94
  -6   1  15   10.65    1.28
  -7  -1  15    1.35    1.16
  -7   1  15    0.04    1.05
   7   1  15   -0.04    0.80
   7  -1  15    0.19    0.71
  -8  -1  15    0.59    1.18
  -8   1  15   -0.19    1.03
   8  -1  15   -0.07    0.73
   8   1  15    0.13    0.82
  -9  -1  15    4.98    1.25
  -9   1  15    4.80    1.15
   9  -1  15    3.46    0.82
 -10  -1  15    1.09    1.14
 -10   1  15   -0.30    1.03
  10  -1  15    0.66    0.72
  11  -1  15   10.06    1.04
 -11  -1  15   11.78    1.46
 -11   1  15    9.88    1.31
  12  -1  15    3.21    0.84
  13  -1  15    1.83    0.87
   0  -1  16   -0.22    0.75
   1  -1  16    0.09    0.76
  -1  -1  16    0.91    0.72
   2  -1  16    0.47    0.74
  -2  -1  16    1.30    0.74
   3  -1  16    1.17    0.75
  -3  -1  16    0.44    0.73
   4  -1  16    2.75    0.78
   5  -1  16    2.02    0.78
   6  -1  16    0.20    0.76
   7  -1  16    0.67    0.77
   0   2   0  913.64    6.92
   0  -2   0 1000.00   11.80
  -1  -2   0    0.08    0.17
   1   2   0   -0.02    0.10
   1  -2   0    0.02    0.20
   2  -2   0   11.82    0.53
   2  -2   0   10.77    0.37
  -2  -2   0   11.86    0.41
   2   2   0   11.90    0.26
  -3  -2   0    0.18    0.21
   3  -2   0    0.17    0.33
   3   2   0    0.06    0.16
   4  -2   0   13.22    0.57
   4   2   0   14.11    0.41
  -4  -2   0   13.09    0.47
  -5  -2   0    0.14    0.26
   5  -2   0    0.10    0.32
   5   2   0    0.35    0.27
  -6   2   0    6.01    0.48
   6  -2   0    5.74    0.43
   6   2   0    5.92    0.43
  -6  -2   0    6.32    0.42
  -7  -2   0    0.04    0.32
  -7   2   0    0.25    0.37
   7  -2   0    0.15    0.30
   7   2   0    0.18    0.36
   8  -2   0    3.51    0.39
  -8   2   0    3.27    0.43
   8   2   0    3.57    0.46
  -8  -2   0    3.71    0.45
  -9  -2   0    0.45    0.40
  -9   2   0    0.35    0.38
   9  -2   0    0.00    0.33
   9   2   0    0.56    0.47
  10  -2   0  152.81    1.67
  10   2   0  147.25    1.87
 -10  -2   0  149.23    2.05
  11   2   0    1.31    0.54
 -11  -2   0    0.53    0.51
 -11   2   0    0.53    0.40
  11  -2   0    1.58    0.36
 -12   2   0  228.20    2.09
  12  -2   0  221.91    2.03
 -12  -2   0  228.20    2.75
  12   2   0  230.60    2.53
 -13  -2   0    0.21    0.58
  13  -2   0    0.12    0.35
  13   2   0    0.84    0.65
 -13   2   0    0.13    0.38
  14  -2   0    9.85    0.55
  14   2   0   10.95    0.86
 -14  -2   0    9.56    0.82
 -14   2   0    9.78    0.57
 -15  -2   0    0.98    0.63
  15  -2   0    0.27    0.37
 -15   2   0    0.18    0.40
  15   2   0    0.91    0.72
  16  -2   0   24.85    0.79
  16   2   0   24.35    1.18
 -16  -2   0   25.50    1.21
 -16   2   0   22.94    0.79
 -17  -2   0    0.42    0.69
  17  -2   0    0.09    0.35
 -17   2   0    0.11    0.41
  17   2   0    0.66    0.75
  18  -2   0   18.21    0.70
 -18  -2   0   16.61    1.08
 -18   2   0   17.58    0.74
 -19   2   0    0.17    0.38
 -19  -2   0    0.87    0.65
  19  -2   0    0.01    0.35
  19   2   0    0.81    0.75
  20   2   0   13.46    1.06
 -20  -2   0   13.36    1.03
 -20   2   0   12.21    0.67
 -21   2   0    0.47    0.43
 -21  -2   0    0.53    0.71
 -22  -2   0  154.69    2.99
  22   2   0  151.68    2.89
 -23  -2   0    1.32    0.74
  23   2   0    1.18    0.85
  24   2   0   21.04    1.35
 -24  -2   0   21.59    1.35
 -25  -2   0    0.05    0.77
  25   2   0    0.64    0.93
 -26  -2   0    3.10    0.86
  26   2   0    3.32    0.99
 -27  -2   0   -0.04    0.85
  27   2   0    0.98    1.01
 -28  -2   0    7.51    1.09
 -28   2   0    7.46    1.22
  28   2   0    7.01    1.17
 -29  -2   0    0.83    0.89
 -29   2   0    0.87    1.08
  29   2   0    1.05    1.12
 -30  -2   0    5.69    1.14
 -30   2   0    5.00    1.19
  30   2   0    5.46    1.27
 -31  -2   0    0.11    1.02
 -31   2   0    0.41    1.11
  31   2   0    0.15    1.18
 -32   2   0   -0.03    1.16
  32   2   0    1.58    1.20
   0  -2   1    0.26    0.32
   0   2   1    0.03    0.14
   0  -2   1    0.10    0.20
   0  -2  -1    0.00    0.14
  -1  -2   1    6.80    0.35
   1   2   1    6.62    0.26
   1  -2   1    7.25    0.45
  -1  -2   1    7.17    0.46
   1  -2  -1    6.30    0.25
   1  -2   1    6.73    0.34
  -1  -2  -1    6.95    0.29
  -1   2   1    6.47    0.25
  -2  -2   1    0.19    0.22
   2   2   1    0.12    0.16
  -2  -2  -1    0.02    0.18
   2  -2   1    0.13    0.30
  -2  -2   1    0.30    0.32
   2  -2   1    0.14    0.21
  -3  -2   1    1.18    0.25
  -3  -2  -1    0.82    0.21
   3  -2   1    0.66    0.34
  -3  -2   1    1.25    0.33
   3   2  -1    1.09    0.13
   3   2   1    0.96    0.20
  -4  -2   1   -0.06    0.24
  -4  -2  -1    0.01    0.23
   4   2   1    0.08    0.25
   4  -2   1    0.13    0.30
   4   2  -1    0.03    0.20
  -4  -2   1   -0.01    0.33
  -5  -2   1    0.51    0.27
  -5  -2  -1    0.69    0.28
   5  -2   1    0.53    0.32
  -5   2   1    0.97    0.39
  -5  -2   1    0.99    0.34
   5   2   1    0.99    0.29
   5   2  -1    0.84    0.27
   6   2   1    2.25    0.35
  -6   2   1    3.00    0.42
  -6  -2   1    2.82    0.40
   6  -2  -1    2.82    0.37
   6  -2   1    2.74    0.39
  -6  -2   1    3.10    0.36
  -6  -2  -1    2.65    0.35
   6   2  -1    3.64    0.36
  -7  -2  -1    1.91    0.37
  -7  -2   1    1.95    0.36
  -7   2   1    2.13    0.41
   7  -2   1    1.31    0.35
   7  -2  -1    1.73    0.35
  -7  -2   1    1.79    0.36
   7   2   1    1.52    0.41
   7   2  -1    1.57    0.36
  -8   2   1    3.74    0.45
   8  -2   1    4.38    0.39
  -8  -2   1    4.12    0.41
  -8   2  -1    4.08    0.43
  -8  -2   1    3.86    0.44
   8   2   1    3.73    0.50
  -8  -2  -1    4.02    0.45
   8  -2  -1    4.33    0.40
   9  -2  -1    2.84    0.38
  -9  -2   1    1.86    0.41
  -9  -2  -1    2.58    0.46
  -9  -2   1    2.25    0.39
   9  -2   1    2.06    0.34
  -9   2   1    2.33    0.41
  -9   2  -1    2.33    0.39
   9   2   1    2.04    0.49
 -10   2  -1    0.75    0.38
 -10  -2   1    0.53    0.43
 -10   2   1    0.68    0.41
 -10  -2  -1    0.92    0.48
 -10  -2   1    0.85    0.36
  10  -2   1    1.20    0.34
  10  -2  -1    0.92    0.35
  10   2   1    0.64    0.52
 -11   2   1   63.86    1.20
 -11   2  -1   64.54    1.12
  11  -2  -1   62.76    1.11
 -11  -2   1   61.52    1.11
 -11  -2  -1   63.91    1.47
  11   2   1   62.68    1.39
 -11  -2   1   65.73    1.47
  11  -2   1   63.96    1.16
  12  -2   1    2.71    0.41
 -12  -2   1    3.14    0.61
 -12   2  -1    2.23    0.42
 -12  -2  -1    2.32    0.59
  12  -2  -1    2.58    0.39
 -12  -2   1    2.00    0.42
 -12   2   1    2.61    0.44
  12   2   1    2.50    0.64
 -13   2  -1    3.81    0.42
  13  -2   1    3.55    0.43
  13  -2  -1    3.14    0.43
 -13  -2   1    3.83    0.44
 -13  -2   1    4.32    0.67
 -13  -2  -1    3.36    0.67
  13   2   1    4.21    0.71
 -13   2   1    3.28    0.46
 -14  -2   1    1.78    0.62
 -14  -2  -1    0.86    0.65
  14  -2  -1    1.04    0.36
 -14  -2   1    1.41    0.39
  14  -2   1    1.72    0.40
 -14   2   1    1.37    0.42
 -14   2  -1    1.51    0.38
  14   2   1    1.81    0.70
 -15  -2   1    0.31    0.63
 -15  -2  -1    0.54    0.70
  15  -2   1    0.43    0.37
  15  -2  -1    0.58    0.35
 -15  -2   1    0.95    0.39
 -15   2   1    0.67    0.43
 -15   2  -1    0.82    0.36
  15   2   1    1.51    0.75
  16  -2   1    4.15    0.47
  16  -2  -1    4.12    0.43
 -16  -2   1    3.66    0.73
 -16  -2  -1    3.44    0.77
  16   2   1    5.22    0.85
 -16   2   1    4.08    0.51
 -16   2  -1    4.04    0.45
 -17  -2   1    1.89    0.68
 -17   2   1    1.79    0.46
  17  -2   1    1.66    0.41
 -17  -2  -1    1.47    0.76
  17  -2  -1    1.73    0.38
 -17   2  -1    1.57    0.40
  17   2   1    2.23    0.79
 -18   2   1    1.10    0.42
 -18   2  -1    1.31    0.38
 -18  -2   1    0.99    0.70
  18  -2   1    1.47    0.39
 -18  -2  -1    1.03    0.69
  18  -2  -1    1.03    0.34
  18   2   1    1.74    0.79
  19   2   1   20.78    1.21
  19  -2   1   18.77    0.73
 -19  -2   1   19.67    1.16
 -19  -2  -1   20.75    1.19
 -19   2   1   19.25    0.82
 -19   2  -1   20.21    0.74
 -20   2   1    0.69    0.43
 -20  -2   1    1.02    0.68
  20  -2   1    0.49    0.36
 -20  -2  -1    0.10    0.71
  20   2   1    1.53    0.83
 -21   2   1   28.92    1.01
  21   2   1   29.37    1.45
 -21  -2   1   27.81    1.40
 -21  -2  -1   29.60    1.45
 -22  -2   1    3.52    0.83
 -22  -2  -1    4.60    0.90
  22   2   1    5.10    0.95
 -22   2   1    3.64    0.53
  23   2   1   15.55    1.25
 -23  -2   1   16.75    1.23
 -23  -2  -1   15.77    1.19
 -24  -2   1    0.73    0.76
 -24  -2  -1    0.82    0.84
  24   2   1    0.29    0.88
 -25  -2   1    1.90    0.77
 -25  -2  -1    1.05    0.82
  25   2   1    2.82    0.97
 -26  -2   1    1.71    0.83
 -26  -2  -1    0.77    0.88
 -26   2   1    2.14    0.96
  26   2   1    0.52    1.00
  27   2  -1    0.92    0.94
 -27  -2   1    0.50    0.89
 -27  -2  -1    1.02    0.87
 -27   2   1    0.90    0.99
  27   2   1    1.57    1.03
 -28  -2   1    3.78    0.95
 -28  -2  -1    3.68    0.99
 -28   2   1    2.59    1.04
  28   2   1    3.15    1.11
  28   2  -1    3.39    1.04
 -29  -2   1   -0.07    0.96
 -29  -2  -1    0.27    0.94
 -29   2   1    0.69    1.06
  29   2   1    0.48    1.10
  29   2  -1    1.13    1.04
  30   2   1    0.81    1.15
  30   2  -1    1.25    1.10
 -30  -2   1    0.81    0.93
 -30  -2  -1    0.90    0.93
 -30   2   1    0.19    1.07
 -31  -2   1    2.02    1.01
 -31  -2  -1    3.14    0.99
 -31   2   1    2.28    1.07
 -31   2  -1    2.45    1.09
  31   2   1    1.43    1.14
  31   2  -1    3.52    1.17
  32   2  -1   -0.01    1.18
 -32   2   1    0.01    1.17
 -32   2  -1    0.60    1.10
  32   2   1    0.57    1.19
   0  -2   2   61.63    1.08
   0   2   2   57.45    0.77
   0  -2   2   61.84    0.94
  -1  -2   2    1.53    0.32
   1   2   2    2.03    0.22
  -1  -2  -2    1.86    0.17
   1  -2   2    1.59    0.36
   1  -2  -2    1.81    0.15
  -1   2   2    1.69    0.21
  -1  -2   2    2.25    0.30
   1  -2   2    1.89    0.28
  -2   2   2    5.41    0.53
   2  -2   2    5.27    0.41
   2  -2   2    4.34    0.33
  -2   2   2    4.94    0.29
   2  -2   2    5.03    0.14
  -2  -2   2    4.93    0.36
  -2  -2  -2    4.89    0.25
   2   2   2    5.59    0.32
  -2  -2   2    5.04    0.43
   3  -2   2    4.80    0.39
  -3  -2   2    4.89    0.42
  -3   2   2    5.24    0.50
  -3   2   2    4.92    0.29
   3  -2   2    4.64    0.34
   3   2   2    4.96    0.32
   3  -2   2    5.03    0.25
   3   2  -2    4.94    0.18
  -3  -2   2    5.52    0.38
  -3  -2  -2    4.80    0.28
  -4   2   2    0.84    0.44
  -4  -2   2    0.49    0.28
   4  -2   2    0.66    0.30
  -4  -2   2    0.50    0.32
   4   2   2    0.14    0.26
  -4  -2  -2    0.47    0.24
   4  -2   2    0.45    0.28
   5  -2   2   50.24    1.01
  -5   2   2   48.59    1.08
  -5  -2   2   49.38    0.97
   5   2   2   51.05    0.95
  -5  -2   2   49.16    0.96
   5  -2   2   48.38    0.88
  -5  -2  -2   50.20    0.88
  -6   2   2    1.14    0.44
  -6  -2   2    1.11    0.30
  -6  -2  -2    1.24    0.33
   6  -2   2    1.67    0.35
  -6  -2   2    1.39    0.34
   6   2   2    1.06    0.35
  -7  -2   2   14.17    0.62
  -7  -2   2   13.87    0.59
   7   2   2   13.25    0.62
  -7  -2  -2   13.82    0.62
   7  -2   2   13.69    0.59
  -7   2   2   14.43    0.68
  -8  -2   2    0.45    0.38
  -8  -2  -2    0.67    0.40
   8  -2   2    0.30    0.33
  -8   2   2    0.57    0.39
  -8  -2   2    0.43    0.34
   8   2   2    0.66    0.42
  -9   2   2   44.77    1.07
   9  -2   2   46.04    1.01
  -9  -2   2   44.59    0.93
   9  -2  -2   47.06    0.97
  -9   2  -2   44.90    0.93
  -9  -2  -2   45.84    1.18
   9   2   2   45.20    1.13
  -9  -2   2   46.06    1.11
  10  -2   2   17.95    0.70
 -10  -2   2   17.49    0.63
 -10   2  -2   18.22    0.64
  10  -2  -2   17.75    0.66
  10   2   2   17.06    0.84
 -10  -2   2   17.56    0.79
 -10  -2  -2   18.35    0.88
 -10   2   2   18.41    0.74
 -11   2   2   78.63    1.39
  11  -2   2   78.23    1.33
 -11   2  -2   78.65    1.18
  11  -2  -2   80.62    1.23
 -11  -2  -2   77.87    1.64
 -11  -2   2   76.18    1.16
  11   2   2   81.18    1.62
 -11  -2   2   81.34    1.61
  12  -2   2   27.10    0.84
 -12   2  -2   26.00    0.74
  12  -2  -2   26.74    0.77
 -12  -2   2   25.57    0.72
  12   2   2   27.64    1.10
 -12  -2   2   27.04    1.06
 -12  -2  -2   27.71    1.12
 -12   2   2   24.76    0.85
  13  -2   2   24.91    0.83
 -13   2  -2   23.45    0.71
  13  -2  -2   24.38    0.76
 -13  -2   2   22.23    0.67
  13   2   2   24.85    1.11
 -13  -2   2   24.43    1.06
 -13  -2  -2   23.75    1.10
 -13   2   2   23.01    0.83
 -14   2  -2    1.44    0.34
 -14  -2   2    1.44    0.66
  14  -2   2    1.33    0.42
 -14  -2  -2    1.04    0.66
 -14  -2   2    0.96    0.34
  14  -2  -2    1.57    0.40
 -14   2   2    1.57    0.45
  14   2   2    1.21    0.74
  15  -2   2    8.48    0.59
  15  -2  -2    7.24    0.50
 -15  -2   2    7.75    0.81
  15   2   2    8.00    0.91
 -15  -2  -2    7.79    0.85
 -15   2  -2    7.18    0.47
 -15   2   2    7.40    0.61
 -16  -2   2    0.17    0.67
  16  -2   2    0.26    0.39
 -16   2   2    0.29    0.45
 -16  -2  -2    0.33    0.73
  16  -2  -2    0.08    0.36
 -16   2  -2   -0.05    0.33
  16   2   2    0.49    0.80
  17  -2   2   14.68    0.70
  17  -2  -2   15.28    0.62
  17   2   2   15.19    1.09
 -17   2  -2   15.80    0.61
 -17  -2   2   14.68    1.03
 -17  -2  -2   15.68    1.05
 -17   2   2   13.98    0.75
 -18   2   2    0.68    0.45
 -18  -2   2    0.80    0.64
  18  -2   2    0.44    0.37
 -18  -2  -2    0.42    0.67
  18  -2  -2    0.54    0.32
  18   2   2    0.34    0.80
 -19   2   2    1.98    0.46
 -19  -2   2    2.31    0.74
  19  -2   2    1.52    0.40
 -19  -2  -2    1.69    0.73
  19   2   2    1.33    0.81
  20  -2   2   10.07    0.64
  20   2   2    9.40    1.03
 -20  -2   2    9.46    0.95
 -20   2   2   10.61    0.71
 -20  -2  -2   11.64    1.00
 -21   2   2    0.88    0.47
  21   2   2    0.52    0.89
 -21  -2   2    0.20    0.74
  21  -2   2    0.40    0.42
 -21  -2  -2    0.55    0.71
 -22  -2   2    0.53    0.76
 -22   2   2    0.64    0.83
 -22  -2  -2    0.75    0.77
  22   2   2    0.78    0.90
 -22   2   2    0.81    0.48
 -23  -2   2    1.65    0.77
 -23  -2  -2    0.69    0.77
 -23   2   2    0.84    0.85
 -23   2   2    0.89    0.52
  23   2   2    1.74    0.93
  24   2   2   14.32    1.29
 -24  -2  -2   13.28    1.16
 -24  -2   2   11.02    1.11
 -24   2   2   13.00    0.86
 -24   2   2   12.46    1.18
 -25  -2   2    0.97    0.83
 -25  -2  -2   -0.03    0.85
 -25   2   2    0.58    0.88
  25   2   2    0.59    0.93
 -26  -2   2    0.67    0.85
 -26  -2  -2    1.31    0.86
 -26   2   2    0.75    0.94
  26   2   2    1.53    1.01
  27   2   2    3.35    1.12
 -27  -2   2    2.72    0.93
 -27  -2  -2    2.60    0.98
 -27   2   2    2.26    0.99
 -28  -2   2    5.03    1.04
 -28  -2  -2    4.37    1.09
 -28   2   2    3.63    1.07
  28   2   2    5.08    1.16
 -29  -2   2    2.99    1.02
 -29  -2  -2    3.01    1.03
 -29   2   2    2.46    1.10
  29   2   2    1.81    1.19
  29  -2   2    5.10    1.22
 -30  -2   2    7.85    1.17
 -30   2   2    7.48    1.28
  30  -2   2    9.56    1.38
 -30  -2  -2    9.70    1.23
  30   2   2    8.80    1.34
 -31  -2   2   16.25    1.48
 -31  -2  -2   17.70    1.49
  31   2   2   14.45    1.52
  31  -2   2   15.44    1.60
 -31   2   2   13.02    1.46
  31   2  -2   14.84    1.46
 -32   2   2    0.63    1.14
  32   2  -2    1.19    1.11
   0  -2  -3   -0.03    0.06
   0  -2   3    0.30    0.32
   0   2   3    0.74    0.43
   0   2   3    0.05    0.22
   0  -2   3    0.07    0.25
   1  -2   3    5.35    0.44
  -1  -2   3    5.13    0.42
  -1   2   3    4.86    0.50
  -1  -2   3    4.66    0.38
  -1  -2  -3    4.43    0.16
  -1   2   3    4.63    0.33
   1  -2   3    4.73    0.14
   1  -2   3    5.50    0.39
   1   2   3    4.79    0.34
  -2  -2  -3    4.50    0.21
  -2  -2   3    6.03    0.43
  -2   2   3    5.54    0.54
  -2  -2   3    4.79    0.39
   2  -2   3    4.75    0.42
  -2   2   3    4.63    0.33
   2  -2   3    4.50    0.37
   2  -2   3    4.90    0.18
   2   2   3    4.33    0.34
   3  -2   3    2.74    0.40
  -3   2   3    3.01    0.50
  -3   2   3    2.83    0.29
   3  -2   3    2.78    0.32
   3   2   3    2.78    0.32
   3  -2   3    2.74    0.20
  -3  -2   3    2.69    0.34
  -3  -2  -3    2.83    0.23
  -3  -2   3    3.24    0.38
   4   2   3    9.03    0.47
   4  -2   3    9.45    0.52
  -4   2   3    8.98    0.63
  -4  -2   3    8.46    0.48
  -4   2   3    8.57    0.41
   4  -2   3    8.64    0.35
  -4  -2   3    8.33    0.46
  -4  -2  -3    7.87    0.37
  -5  -2  -3    1.32    0.30
  -5  -2   3    1.40    0.31
   5   2   3    1.04    0.34
   5  -2   3    1.10    0.35
  -5  -2   3    1.06    0.32
   5  -2   3    0.92    0.31
  -5   2   3    1.05    0.45
  -6  -2   3    0.34    0.32
  -6  -2  -3    0.41    0.34
   6  -2   3    0.48    0.36
  -6  -2   3    0.55    0.32
  -6   2   3    0.11    0.41
   6  -2   3    0.09    0.36
   6   2   3    0.51    0.37
  -7  -2   3    0.27    0.31
   7  -2   3    0.19    0.41
  -7   2   3    0.18    0.42
  -7  -2  -3    0.30    0.40
   7  -2   3    0.34    0.37
   7   2   3    0.37    0.41
  -7  -2   3    0.38    0.31
   8  -2   3    2.63    0.51
  -8  -2   3    2.74    0.40
  -8   2   3    2.85    0.47
   8  -2   3    2.53    0.42
  -8  -2  -3    2.27    0.49
  -8  -2   3    1.87    0.33
   8   2   3    3.05    0.49
  -9   2   3    2.69    0.43
   9  -2   3    3.27    0.45
  -9  -2   3    2.71    0.36
   9   2   3    3.11    0.52
  -9  -2  -3    2.77    0.53
  -9  -2   3    3.62    0.47
   9  -2   3    2.86    0.58
 -10   2   3    5.70    0.55
  10   2   3    5.19    0.62
 -10  -2   3    4.99    0.41
  10  -2   3    4.84    0.50
 -10   2  -3    5.12    0.44
 -10  -2  -3    4.23    0.62
 -10  -2   3    6.64    0.60
  10  -2   3    4.60    0.73
 -11  -2   3    1.12    0.47
  11  -2   3    1.24    0.73
  11  -2   3    0.56    0.39
 -11  -2   3    0.66    0.32
 -11  -2  -3    0.33    0.57
 -11   2  -3    0.77    0.37
 -11   2   3    0.88    0.43
  11   2   3    0.64    0.56
  12  -2   3    9.77    0.62
 -12   2  -3    8.80    0.49
 -12  -2   3    8.01    0.44
  12  -2   3    8.30    0.91
  12  -2  -3    8.52    0.54
  12   2   3    8.77    0.79
 -12  -2   3    8.10    0.71
 -12  -2  -3    9.40    0.78
 -12   2   3    8.50    0.64
 -13  -2   3    1.93    0.60
  13  -2   3    1.66    0.44
 -13  -2   3    1.79    0.33
 -13   2  -3    1.63    0.36
 -13  -2  -3    2.12    0.66
  13   2   3    1.16    0.71
  13  -2  -3    2.37    0.41
 -13   2   3    1.82    0.47
  13  -2   3    3.06    0.87
 -14  -2  -3   26.16    1.15
  14  -2   3   27.17    0.91
  14  -2  -3   26.61    0.78
 -14   2   3   24.66    0.93
  14   2   3   26.81    1.22
 -14   2  -3   26.05    0.68
  14  -2   3   28.77    1.37
 -14  -2   3   24.10    1.12
 -15  -2   3    0.72    0.61
  15  -2   3    0.98    0.45
  15   2   3    0.78    0.79
 -15   2   3    0.16    0.51
 -15  -2  -3    1.20    0.71
  15  -2  -3    1.02    0.38
 -15   2  -3    0.87    0.31
  15  -2   3    2.39    0.92
  16  -2   3   41.25    1.12
 -16   2   3   43.25    1.21
  16  -2  -3   45.75    0.99
 -16   2   3   40.77    1.49
 -16  -2   3   42.82    1.49
  16   2   3   44.52    1.56
  16  -2   3   40.35    1.62
 -16  -2  -3   44.06    1.48
  17  -2   3   17.86    0.80
  17  -2  -3   20.17    0.70
 -17   2   3   17.27    1.12
 -17   2   3   17.34    0.85
  17   2   3   20.59    1.22
  17  -2   3   17.04    1.25
 -17  -2   3   19.92    1.14
 -17  -2  -3   20.02    1.11
 -18   2   3    0.61    0.44
 -18  -2   3    0.54    0.67
  18  -2   3    0.79    0.41
 -18  -2  -3    0.48    0.67
 -18   2   3    0.72    0.73
  18   2   3    0.16    0.79
  18  -2   3    2.24    0.93
  19  -2   3   15.69    0.78
  19   2   3   15.98    1.16
  19  -2   3   15.38    1.23
 -19  -2  -3   18.12    1.12
 -19   2   3   15.39    1.15
 -19   2   3   15.32    0.83
 -19  -2   3   17.37    1.14
 -20   2   3    0.37    0.48
  20  -2   3    0.14    0.45
 -20  -2  -3    0.47    0.72
 -20   2   3    0.49    0.76
  20   2   3    0.32    0.86
 -20  -2   3    0.14    0.67
  20  -2   3    2.22    0.96
 -21   2   3    3.48    0.58
 -21  -2   3    3.07    0.80
  21  -2   3    2.12    0.49
 -21  -2  -3    3.09    0.79
 -21   2   3    2.41    0.85
  21   2   3    2.46    0.88
  21  -2   3    2.72    0.98
 -22  -2   3    1.55    0.81
 -22  -2  -3    0.42    0.73
 -22   2   3   -0.14    0.83
  22   2   3    0.88    0.93
 -22   2   3    0.32    0.53
  22  -2   3    1.87    0.99
 -23  -2   3    3.47    0.81
 -23  -2  -3    2.92    0.82
 -23   2   3    2.75    0.86
 -23   2   3    3.06    0.60
  23   2   3    3.02    1.00
  23  -2   3    4.79    1.09
 -24  -2   3    2.84    0.84
 -24  -2  -3    3.35    0.85
 -24   2   3    2.21    0.91
 -24   2   3    1.76    0.59
  24   2   3    1.03    0.96
  24  -2   3    2.99    1.03
 -25  -2   3    1.63    0.82
 -25  -2  -3    0.68    0.83
 -25   2   3    1.20    0.93
 -25   2   3    1.34    0.61
  25   2   3    1.35    1.02
  25  -2   3    1.60    1.06
 -26  -2   3    0.66    0.85
 -26  -2  -3   -0.05    0.88
 -26   2   3   -0.26    0.93
  26   2   3    0.51    1.04
  26  -2   3    1.09    1.12
 -27  -2   3    4.22    0.99
 -27  -2  -3    4.30    1.01
 -27   2   3    3.63    1.07
  27  -2   3    5.20    1.23
  27   2   3    3.98    1.15
  28  -2   3    5.78    1.28
 -28  -2   3    6.46    1.16
 -28  -2  -3    5.79    1.11
 -28   2   3    4.89    1.17
  28   2   3    6.23    1.23
 -29  -2   3    1.10    0.96
 -29  -2  -3    0.39    0.98
 -29   2   3    0.15    1.11
  29  -2   3    1.08    1.18
  29   2   3    0.30    1.19
 -30  -2   3    3.88    1.04
 -30  -2  -3    4.99    1.13
 -30   2   3    3.05    1.11
  30   2   3    2.98    1.19
  30  -2   3    5.43    1.32
 -31  -2  -3    0.72    1.01
  31   2   3    1.05    1.23
  31  -2   3    1.00    1.25
   0  -2   4  130.90    1.68
   0   2   4  126.33    1.81
   0   2   4  127.58    1.42
   0  -2   4  131.97    0.85
   1  -2   4   23.07    0.78
  -1  -2   4   23.67    0.78
  -1   2   4   22.79    0.86
  -1  -2   4   23.54    0.38
  -1   2   4   24.34    0.67
   1  -2   4   23.65    0.40
   1  -2   4   23.64    0.72
   1   2   4   23.54    0.67
  -1  -2   4   23.43    0.71
   1   2   4   23.14    0.87
   2  -2   4    0.17    0.16
   2  -2   4    0.15    0.30
  -2  -2  -4    0.33    0.11
   2  -2   4    0.21    0.36
  -2  -2   4    0.44    0.35
   2   2   4    0.63    0.46
  -2   2   4    0.17    0.27
  -2   2   4   -0.27    0.45
   2   2   4    0.34    0.30
  -2  -2   4    0.06    0.34
  -3   2   4    4.18    0.55
   3  -2   4    4.22    0.47
  -3  -2   4    4.10    0.42
   3   2   4    3.73    0.54
   3  -2   4    4.54    0.40
  -3   2   4    3.78    0.36
   3   2   4    4.34    0.39
   3  -2   4    3.73    0.24
  -3  -2   4    3.54    0.38
  -3  -2  -4    3.87    0.25
  -4  -2   4    1.12    0.32
   4   2   4    1.53    0.51
  -4  -2  -4    1.48    0.26
   4  -2   4    1.55    0.41
  -4  -2   4    1.36    0.36
  -4   2   4    0.73    0.47
  -4   2   4    1.25    0.30
   4   2   4    1.33    0.34
   4  -2   4    1.54    0.25
  -5   2   4  140.99    1.91
   5  -2   4  144.87    1.83
  -5  -2   4  140.32    1.66
   5  -2   4  145.19    1.36
  -5   2   4  141.87    1.54
  -5  -2  -4  139.35    1.48
  -5  -2   4  143.14    1.72
  -6   2   4  133.30    1.86
   6  -2   4  127.77    1.76
  -6  -2   4  124.34    1.56
  -6  -2   4  134.25    1.70
  -6  -2  -4  126.64    1.56
   6   2   4  131.54    1.75
   6  -2   4  129.59    1.43
  -6   2   4  129.98    0.84
  -7   2   4   65.14    1.35
  -7  -2  -4   62.71    1.22
   7  -2   4   66.76    1.31
  -7  -2   4   63.28    1.12
   7   2   4   62.67    1.31
   7  -2   4   62.91    1.14
  -7  -2   4   65.67    1.25
  -7   2   4   62.59    0.76
  -8  -2   4    0.31    0.40
   8  -2   4    0.49    0.43
  -8  -2   4    0.37    0.32
  -8  -2  -4    0.52    0.48
  -8   2   4    0.38    0.29
   8  -2   4    0.30    0.49
   8   2   4    0.31    0.48
  -8   2   4    1.11    0.49
   9  -2   4    8.38    0.59
  -9  -2   4    8.17    0.49
   9  -2   4    7.68    0.68
  -9  -2  -4    7.98    0.65
  -9  -2   4    8.07    0.58
  -9   2   4    8.37    0.48
   9   2   4    8.06    0.68
  -9   2   4    8.82    0.66
 -10  -2   4   12.31    0.54
 -10  -2   4   12.92    0.71
 -10  -2  -4   13.95    0.80
  10  -2   4   14.58    0.71
  10   2   4   14.51    0.85
  10  -2   4   12.82    0.84
 -10   2   4   13.99    0.63
 -10   2   4   14.32    0.76
  11  -2   4   40.82    1.10
 -11  -2   4   38.21    0.83
 -11   2  -4   41.65    0.84
 -11  -2  -4   43.51    1.25
  11  -2   4   39.90    1.34
 -11  -2   4   38.94    1.15
 -11   2   4   41.09    1.04
 -11   2   4   40.69    1.15
  11   2   4   40.91    1.28
  12  -2   4   36.26    1.06
 -12  -2   4   33.02    0.77
 -12   2  -4   35.88    0.77
  12   2   4   34.95    1.25
 -12  -2   4   35.60    1.17
 -12  -2  -4   36.78    1.23
 -12   2   4   36.00    1.06
 -12   2   4   36.13    1.11
 -13  -2   4    0.60    0.58
  13   2   4    1.46    0.66
  13  -2   4    0.50    0.45
 -13  -2   4    0.55    0.31
 -13   2   4    1.12    0.51
 -13   2   4    0.62    0.56
 -13   2  -4    0.63    0.33
  13  -2   4    0.10    0.88
  14  -2   4    4.03    0.53
  14  -2  -4    3.80    0.46
 -14  -2   4    3.78    0.68
 -14   2   4    3.03    0.57
 -14  -2  -4    3.52    0.70
 -14   2   4    4.22    0.71
  14   2   4    3.44    0.72
  14  -2   4    2.76    0.92
  15  -2  -4    3.89    0.45
 -15   2   4    3.24    0.58
 -15  -2  -4    4.37    0.74
 -15   2   4    4.11    0.71
  15  -2   4    4.81    0.55
 -15  -2   4    3.98    0.67
  15   2   4    4.88    0.80
  15  -2   4    4.57    0.97
  16  -2   4   47.24    1.26
 -16   2   4   44.93    1.30
  16  -2  -4   49.41    1.03
  16  -2   4   46.87    1.78
 -16  -2  -4   49.11    1.51
  16   2   4   48.22    1.60
 -16   2   4   48.39    1.48
 -16  -2   4   44.25    1.50
  17  -2   4   75.64    1.58
 -17   2   4   74.88    1.65
  17   2   4   80.51    2.07
  17  -2   4   76.04    2.22
 -17  -2   4   73.28    1.93
 -17  -2  -4   81.17    1.94
 -17   2   4   75.85    1.88
 -18   2   4    3.93    0.57
 -18  -2   4    4.06    0.72
  18  -2   4    3.65    0.54
 -18  -2  -4    4.74    0.77
 -18   2   4    3.80    0.78
  18   2   4    3.71    0.85
  18  -2   4    3.91    1.00
 -19   2   4    3.16    0.56
 -19  -2   4    3.26    0.76
  19  -2   4    3.12    0.53
 -19  -2  -4    5.48    0.81
 -19   2   4    3.07    0.79
  19   2   4    2.97    0.90
  19  -2   4    3.56    1.00
  20  -2   4   13.60    0.81
 -20   2   4   12.71    1.08
  20   2   4   13.22    1.17
  20  -2   4   12.78    1.29
 -20  -2   4   11.75    1.05
 -20  -2  -4   13.32    1.04
 -20   2   4   12.35    0.83
 -21  -2   4    1.46    0.75
  21  -2   4    0.81    0.48
 -21  -2  -4    0.98    0.73
 -21   2   4    0.90    0.78
  21   2   4    1.20    0.91
  21  -2   4    2.05    1.05
 -21   2   4    1.33    0.55
  22  -2   4   52.88    1.46
 -22   2   4   50.02    1.86
  22   2   4   52.06    1.97
  22  -2   4   48.96    2.05
 -22  -2   4   50.94    1.90
 -22   2   4   50.76    1.52
 -22  -2  -4   52.98    1.82
 -23  -2   4    3.55    0.84
 -23  -2  -4    2.78    0.79
 -23   2   4    2.91    0.86
 -23   2   4    2.13    0.62
  23   2   4    2.73    1.03
  23  -2   4    3.35    1.09
  24  -2   4    0.91    1.07
 -24  -2   4    1.43    0.79
 -24  -2  -4    0.04    0.81
 -24   2   4    0.83    0.82
 -24   2   4    0.51    0.59
  24   2   4    0.02    1.03
 -25  -2   4    6.72    1.04
 -25  -2  -4    7.16    1.04
 -25   2   4    7.27    1.09
 -25   2   4    7.38    0.83
  25   2   4    8.08    1.20
  25  -2   4    6.89    1.23
  26   2   4    0.49    1.09
 -26  -2   4    1.04    0.91
 -26  -2  -4    0.74    0.86
 -26   2   4    0.46    0.67
  26  -2   4    1.16    1.19
 -27  -2   4    1.03    0.95
 -27  -2  -4    0.21    0.89
 -27   2   4   -0.17    0.69
  27   2   4   -0.27    1.16
  27  -2   4    1.79    1.22
 -28  -2   4   12.71    1.32
 -28  -2  -4   14.52    1.33
  28   2   4   11.11    1.44
  28  -2   4   11.38    1.53
 -29  -2   4   25.31    1.67
  29   2   4   27.07    1.83
  29  -2   4   29.48    1.95
 -29  -2  -4   29.89    1.71
 -30  -2   4    4.29    1.08
 -30  -2  -4    4.34    1.05
  30   2   4    4.52    1.25
  30  -2   4    5.95    1.35
  31  -2   4    1.81    1.38
   0  -2   5   -0.01    0.38
   0   2   5   -0.24    0.49
   0  -2   5   -0.13    0.18
   0   2   5    0.22    0.30
   0  -2   5   -0.18    0.35
  -1   2   5   37.42    1.09
   1  -2   5   41.44    1.07
  -1  -2   5   37.45    1.01
   1   2   5   38.02    1.12
   1  -2   5   39.96    0.62
  -1  -2   5   38.99    0.59
  -1   2   5   39.47    0.91
   1  -2   5   39.16    0.95
   1   2   5   40.86    0.93
  -1  -2   5   40.17    0.96
  -2   2   5   12.30    0.74
   2  -2   5   12.75    0.68
  -2  -2   5   12.17    0.64
  -2  -2   5   12.05    0.60
   2   2   5   11.84    0.74
  -2   2   5   12.51    0.57
   2  -2   5   12.81    0.61
   2  -2   5   12.40    0.39
  -2  -2  -5   11.69    0.24
   2   2   5   12.70    0.60
  -3   2   5   27.57    0.99
   3  -2   5   28.01    0.92
  -3  -2   5   27.45    0.87
  -3   2   5   28.63    0.79
   3   2   5   29.04    0.86
   3  -2   5   28.66    0.59
  -3  -2   5   27.60    0.84
  -3  -2  -5   28.07    0.52
   3   2   5   28.68    1.00
  -4   2   5   11.84    0.72
   4   2   5   10.70    0.60
   4  -2   5   11.13    0.43
   4  -2   5   10.70    0.63
  -4  -2   5   10.72    0.61
   4   2   5   11.27    0.73
  -4   2   5   10.43    0.54
  -4  -2   5   11.58    0.60
  -4  -2  -5   11.03    0.47
   5  -2   5   27.42    0.92
  -5  -2  -5   26.75    0.74
   5  -2   5   26.86    0.67
   5   2   5   25.31    0.95
  -5   2   5   26.24    0.95
  -5  -2   5   27.88    0.86
  -5   2   5   25.88    0.77
   5   2   5   26.70    0.88
  -5  -2   5   25.88    0.83
  -6  -2   5    0.06    0.39
   6  -2   5    0.28    0.40
   6   2   5    0.57    0.55
  -6  -2   5    0.44    0.38
   6  -2   5    0.00    0.33
  -6  -2  -5    0.17    0.42
  -6   2   5    0.44    0.35
   6   2   5    0.12    0.42
  -6   2   5    0.60    0.48
  -7  -2   5    0.90    0.40
   7  -2   5    0.60    0.45
  -7  -2   5    0.62    0.38
  -7  -2  -5    0.26    0.43
  -7   2   5    0.55    0.52
   7   2   5    0.12    0.48
   7  -2   5    0.70    0.38
   7   2   5    0.52    0.56
  -8  -2   5    0.29    0.41
  -8   2   5    0.10    0.16
   8  -2   5    0.31    0.48
  -8  -2   5    0.12    0.37
   8   2   5    0.27    0.55
  -8  -2  -5    0.28    0.48
  -8   2   5    0.11    0.51
   8   2   5    0.51    0.51
   8  -2   5    0.26    0.44
  -9  -2   5    0.13    0.41
  -9   2   5    0.42    0.46
  -9   2   5    0.08    0.23
   9  -2   5    0.36    0.42
  -9  -2   5   -0.06    0.35
  -9  -2  -5    0.48    0.53
   9   2   5   -0.07    0.57
   9  -2   5    0.38    0.49
  10  -2   5    4.29    0.58
 -10  -2   5    3.21    0.41
 -10  -2  -5    3.67    0.60
 -10   2   5    3.92    0.61
 -10  -2   5    3.97    0.51
 -10   2   5    3.55    0.32
  10   2   5    3.57    0.62
  10  -2   5    4.13    0.64
 -11  -2   5    2.23    0.53
  11  -2   5    1.84    0.48
 -11  -2   5    2.04    0.39
 -11   2   5    1.78    0.35
 -11  -2  -5    2.25    0.61
 -11   2   5    1.36    0.55
  11   2   5    1.94    0.62
  11  -2   5    2.12    0.70
  12  -2   5    6.13    0.63
 -12  -2   5    5.59    0.45
 -12  -2   5    6.17    0.64
  12   2   5    5.45    0.76
 -12   2   5    5.70    0.49
 -12  -2  -5    6.54    0.72
  12  -2   5    4.89    0.82
 -12   2   5    6.24    0.65
  13  -2   5    6.10    0.91
  13  -2   5    8.08    0.68
 -13   2   5    6.85    0.70
  13   2   5    6.73    0.79
 -13  -2   5    6.91    0.71
 -13   2   5    7.12    0.57
 -13  -2  -5    7.89    0.75
  14  -2   5   17.98    0.88
 -14   2   5   16.82    0.90
 -14  -2   5   17.12    0.95
 -14   2   5   17.09    0.80
  14   2   5   17.86    1.05
  14  -2   5   15.55    1.14
 -14  -2  -5   19.37    0.99
 -15   2   5    9.57    0.74
  15   2   5    9.51    0.88
  15  -2   5    7.20    0.99
 -15  -2   5    8.92    0.78
 -15   2   5   10.31    0.72
 -15  -2  -5   10.23    0.83
  15  -2   5    8.68    0.68
  16  -2   5   36.35    1.19
  16   2   5   34.81    1.41
 -16  -2   5   35.28    1.34
  16  -2   5   32.20    1.55
 -16   2   5   37.41    1.20
 -16  -2  -5   38.30    1.36
 -16   2   5   35.64    1.23
 -17   2   5    2.34    0.56
 -17  -2   5    3.37    0.66
  17   2   5    3.32    0.75
  17  -2   5    2.40    0.53
 -17  -2  -5    2.38    0.66
  17  -2   5    3.46    0.99
 -18   2   5    0.08    0.54
 -18  -2   5    0.23    0.62
  18  -2   5    0.75    0.50
 -18  -2  -5    0.55    0.65
  18  -2   5    0.50    0.97
  18   2   5    0.36    0.72
  19  -2   5   15.95    0.90
 -19  -2  -5   15.91    1.06
 -19   2   5   14.68    0.90
  19   2   5   16.08    1.16
  19  -2   5   13.82    1.31
 -19  -2   5   16.33    1.10
 -20   2   5    0.41    0.56
  20  -2   5    0.40    1.08
  20  -2   5    0.37    0.49
 -20  -2   5    0.33    0.65
 -20  -2  -5    0.95    0.70
  20   2   5    1.17    0.76
  21  -2   5   18.12    1.52
  21   2   5   19.77    1.33
 -21  -2   5   19.10    1.23
  21  -2   5   20.55    1.02
 -21   2   5   18.84    1.04
 -21  -2  -5   21.54    1.23
  22  -2   5   17.21    0.97
  22   2   5   19.24    1.34
  22  -2   5   17.22    1.53
 -22  -2   5   17.50    1.26
 -22   2   5   18.44    1.06
 -22  -2  -5   19.20    1.23
 -23   2   5   -0.17    0.61
 -23  -2   5   -0.30    0.75
  23  -2   5    0.36    0.52
 -23  -2  -5    0.17    0.77
  23   2   5    0.30    0.89
  23  -2   5    1.20    1.11
 -24  -2   5    5.23    0.91
  24   2   5    3.62    0.97
 -24  -2  -5    4.03    0.87
 -24   2   5    4.75    0.77
  24  -2   5    4.58    1.26
 -25  -2   5   10.07    1.18
  25   2   5    9.88    1.26
 -25   2   5    9.38    0.93
  25  -2   5    9.64    1.44
 -25  -2  -5    9.59    1.10
 -26  -2   5    3.70    1.00
 -26  -2  -5    4.64    0.98
  26   2   5    4.40    1.16
 -26   2   5    5.16    0.83
  26  -2   5    4.17    1.29
  27   2   5   20.49    1.62
 -27  -2  -5   22.27    1.46
  27  -2   5   18.43    1.72
 -27  -2   5   20.36    1.53
 -27   2   5   19.72    1.24
 -28  -2   5    5.43    1.12
 -28  -2  -5    6.40    1.09
 -28   2   5    5.07    0.87
  28   2   5    6.47    1.25
  28  -2   5    6.25    1.44
 -29  -2   5    3.30    1.06
 -29  -2  -5    5.33    1.11
  29   2   5    5.74    1.23
  29  -2   5    3.53    1.35
 -30  -2  -5    4.23    1.10
  30   2   5    2.77    1.15
  30  -2   5    1.45    1.33
   0   2   6    5.40    0.63
   0  -2   6    5.43    0.58
   0  -2   6    4.71    0.32
   0   2   6    5.40    0.49
   0  -2   6    5.33    0.51
   1  -2   6   21.09    0.87
  -1  -2   6   21.02    0.87
  -1   2   6   20.72    0.75
  -1  -2   6   20.22    0.52
  -1   2   6   20.64    0.91
  -1  -2   6   19.48    0.77
   1   2   6   19.36    0.90
   1  -2   6   20.05    0.77
   1  -2   6   20.02    0.54
   1   2   6   20.98    0.78
  -2   2   6   20.04    0.91
   2  -2   6   19.76    0.87
  -2  -2   6   19.41    0.84
   2   2   6   18.99    0.90
  -2  -2  -6   19.91    0.33
   2  -2   6   19.20    0.54
  -2   2   6   19.97    0.74
  -2  -2   6   19.87    0.77
  -2  -2   6   18.50    0.50
   2  -2   6   18.99    0.76
   2   2   6   21.00    0.79
   3  -2   6    0.98    0.49
  -3  -2   6    0.47    0.45
  -3  -2  -6    0.14    0.25
   3   2   6    0.23    0.56
  -3   2   6    0.55    0.38
   3   2   6    0.62    0.42
   3  -2   6    0.14    0.27
  -3   2   6    0.89    0.51
  -3  -2   6    0.24    0.41
  -4   2   6   20.73    0.93
   4  -2   6   21.89    0.93
  -4  -2   6   19.90    0.82
   4   2   6   20.04    0.91
   4   2   6   21.84    0.86
  -4   2   6   21.21    0.78
   4  -2   6   20.00    0.60
  -4  -2   6   20.45    0.81
  -4  -2  -6   21.70    0.62
   5  -2   6   25.74    0.98
  -5  -2   6   26.78    0.92
   5   2   6   24.78    0.99
  -5   2   6   27.77    0.87
  -5  -2   6   27.18    0.91
   5   2   6   26.89    0.95
   5  -2   6   26.74    0.71
  -5  -2  -6   27.57    0.76
  -5   2   6   25.88    1.02
   6  -2   6   84.80    1.66
  -6  -2   6   81.56    1.47
   6   2   6   81.24    1.60
  -6   2   6   86.57    1.45
   6   2   6   82.36    1.59
   6  -2   6   80.57    1.23
  -6  -2  -6   80.71    1.28
  -6  -2   6   83.37    1.48
  -6   2   6   82.08    1.66
   7  -2   6   20.57    0.92
  -7  -2   6   17.82    0.77
   7   2   6   19.42    0.92
   7  -2   6   20.03    0.73
   7   2   6   19.08    0.89
  -7  -2   6   19.28    0.80
  -7  -2  -6   20.60    0.78
  -7   2   6   21.21    0.97
  -8  -2   6    0.65    0.42
   8   2   6    0.69    0.59
  -8  -2   6    0.82    0.41
   8  -2   6    0.50    0.48
  -8  -2  -6    0.98    0.48
  -8   2   6    0.63    0.58
   8   2   6    1.11    0.57
   8  -2   6    0.66    0.44
  -9  -2   6    1.55    0.48
  -9  -2   6    1.38    0.42
   9  -2   6    1.49    0.49
   9   2   6    1.52    0.59
  -9  -2  -6    2.51    0.55
  -9   2   6    1.79    0.54
   9  -2   6    1.56    0.52
   9   2   6    1.71    0.63
 -10  -2   6    2.86    0.51
 -10  -2   6    2.86    0.45
  10  -2   6    3.57    0.60
 -10   2   6    3.25    0.65
  10   2   6    2.89    0.62
  10   2   6    2.68    0.64
 -10  -2  -6    4.42    0.62
  10  -2   6    3.65    0.62
 -11  -2   6   35.16    0.95
  11  -2   6   40.61    1.27
  11   2   6   37.12    1.15
  11  -2   6   35.59    1.20
 -11  -2   6   35.13    1.14
  11   2   6   35.48    1.30
 -11  -2  -6   41.21    1.21
 -11   2   6   37.81    1.25
  12  -2   6   21.70    0.98
  12   2   6   21.71    0.93
 -12  -2   6   20.82    0.94
  12   2   6   19.56    1.06
  12  -2   6   20.51    1.04
 -12  -2  -6   22.65    0.97
 -12   2   6   20.51    0.98
 -13  -2   6    0.92    0.52
  13  -2   6    0.61    0.63
 -13   2   6    0.75    0.56
  13  -2   6    0.64    0.51
 -13  -2  -6    1.42    0.56
  13   2   6    1.04    0.65
 -14  -2   6    0.02    0.53
  14  -2   6    0.34    0.47
 -14   2   6    0.02    0.56
 -14  -2  -6    0.06    0.56
  14   2   6    0.23    0.67
  14  -2   6    0.09    0.70
  15  -2   6   14.14    0.87
 -15   2   6   14.14    0.86
  15   2   6   12.80    0.99
  15  -2   6   10.87    1.03
 -15  -2   6   13.17    0.87
 -15  -2  -6   14.28    0.91
  16  -2   6   18.98    0.98
  16   2   6   19.27    1.15
  16  -2   6   19.11    1.29
 -16  -2   6   18.40    1.01
 -16  -2  -6   21.48    1.07
 -16   2   6   18.09    0.99
 -17   2   6    3.33    0.64
  17   2   6    3.44    0.79
 -17  -2   6    2.20    0.63
  17  -2   6    4.22    0.61
 -17  -2  -6    2.95    0.68
  17  -2   6    2.16    0.90
 -18   2   6   25.19    1.15
  18  -2   6   24.97    1.11
  18   2   6   26.93    1.38
  18  -2   6   22.97    1.51
 -18  -2   6   24.78    1.25
 -18  -2  -6   27.08    1.25
  19  -2   6   11.97    0.86
 -19  -2   6   12.42    1.01
  19   2   6   12.11    1.07
  19  -2   6    9.30    1.25
 -19   2   6   13.00    0.92
 -19  -2  -6   13.36    1.01
 -20  -2   6    3.09    0.76
  20  -2   6    4.20    0.66
 -20  -2  -6    3.61    0.76
  20   2   6    3.86    0.84
  20  -2   6    3.57    1.12
 -20   2   6    4.20    0.72
 -21  -2   6    0.09    0.74
  21  -2   6    0.22    0.56
 -21  -2  -6    0.13    0.71
  21   2   6    0.15    0.82
  21  -2   6   -0.67    1.14
 -21   2   6    0.02    0.61
  22  -2   6    1.31    1.13
 -22  -2   6    2.41    0.78
  22  -2   6    1.83    0.60
 -22  -2  -6    2.87    0.82
  22   2   6    3.61    0.95
 -22   2   6    3.23    0.70
 -23  -2   6    3.37    0.88
  23  -2   6    3.66    0.68
 -23  -2  -6    4.40    0.86
 -23   2   6    4.00    0.76
  23   2   6    4.37    0.96
  23  -2   6    3.08    1.20
 -24  -2   6    1.95    0.85
 -24  -2  -6    3.14    0.89
  24  -2   6    1.96    1.25
 -24   2   6    3.20    0.76
  24   2   6    3.09    1.06
 -25   2   6   10.74    1.00
  25   2   6   10.13    1.20
 -25  -2  -6    9.22    1.09
 -25  -2   6    9.53    1.17
  25  -2   6    9.74    1.52
 -26  -2   6    0.49    0.93
 -26  -2  -6   -0.08    0.92
 -26   2   6    0.91    0.74
  26   2   6    0.12    1.01
  26  -2   6   -0.66    1.35
 -27   2   6    0.58    0.73
 -27  -2   6   -0.62    0.93
 -27  -2  -6    0.12    0.93
  27   2   6    0.84    1.00
  27  -2   6   -0.10    1.40
  28   2   6   23.05    1.65
  28  -2   6   18.64    1.80
 -28   2   6   20.49    1.31
 -28  -2   6   20.01    1.55
 -28  -2  -6   22.74    1.54
  29   2   6    8.60    1.33
 -29  -2  -6    8.53    1.20
 -29   2   6    8.31    1.02
  29  -2   6    8.60    1.65
  30  -2   6    0.13    1.45
   0  -2   7    0.34    0.51
   0  -2   7   -0.20    0.28
   0   2   7    0.24    0.40
   0   2   7    0.51    0.55
   0  -2   7    0.36    0.41
   1  -2   7    2.18    0.31
  -1  -2   7    1.83    0.52
   1  -2   7    2.04    0.54
  -1  -2   7    2.48    0.33
  -1   2   7    2.89    0.49
   1   2   7    2.39    0.48
  -1   2   7    2.70    0.59
   1  -2   7    1.87    0.47
  -1  -2   7    2.47    0.45
   1   2   7    1.91    0.59
   2   2   7    0.44    0.54
  -2  -2   7    0.07    0.41
  -2  -2   7    0.18    0.52
   2  -2   7    0.26    0.50
   2  -2   7    0.34    0.44
  -2  -2   7    0.10    0.28
  -2   2   7   -0.01    0.41
   2  -2   7   -0.02    0.28
   2   2   7    0.18    0.45
  -2   2   7   -0.07    0.55
   3   2   7    7.56    0.70
  -3  -2   7    7.78    0.67
   3  -2   7    8.03    0.74
  -3  -2   7    7.74    0.42
  -3   2   7    7.62    0.59
   3  -2   7    7.53    0.45
  -3  -2   7    8.11    0.59
   3   2   7    7.83    0.62
  -3   2   7    6.97    0.70
   4   2   7    6.38    0.68
  -4  -2   7    5.22    0.63
   4  -2   7    6.99    0.70
  -4   2   7    6.84    0.57
   4   2   7    7.31    0.64
   4  -2   7    7.01    0.46
  -4  -2   7    6.44    0.56
  -4   2   7    7.06    0.70
   5   2   7    1.11    0.59
  -5  -2   7    1.59    0.53
   5  -2   7    0.98    0.57
  -5   2   7    1.88    0.57
  -5   2   7    1.71    0.46
   5   2   7    1.83    0.54
   5  -2   7    1.59    0.38
  -5  -2   7    1.30    0.47
  -6  -2   7   20.02    0.89
   6  -2   7   22.76    1.03
   6   2   7   19.69    0.94
   6   2   7   22.70    0.99
   6  -2   7   21.37    0.73
  -6  -2   7   21.28    0.87
  -6   2   7   21.18    0.85
  -6   2   7   20.59    0.99
  -7  -2   7   -0.05    0.45
  -7  -2   7    0.19    0.47
   7  -2   7    0.12    0.56
   7   2   7    0.29    0.56
  -7   2   7    0.55    0.56
  -7   2   7    0.41    0.42
   7   2   7    0.05    0.53
   7  -2   7    0.12    0.40
  -8  -2   7   44.06    1.19
   8  -2   7   45.63    1.40
   8   2   7   44.19    1.25
   8   2   7   44.85    1.36
   8  -2   7   45.16    1.11
  -8  -2   7   45.25    1.21
  -8   2   7   47.00    1.39
  -9  -2   7    2.08    0.49
  -9  -2   7    2.78    0.50
   9  -2   7    2.66    0.64
  -9   2   7    2.90    0.59
   9   2   7    3.01    0.62
   9   2   7    2.29    0.61
   9  -2   7    2.18    0.52
 -10  -2   7   57.49    1.30
  10  -2   7   61.73    1.61
  10   2   7   60.14    1.38
  10   2   7   59.44    1.60
  10  -2   7   63.36    1.43
 -10  -2   7   58.28    1.40
 -10   2   7   64.15    1.63
 -11  -2   7    0.63    0.44
 -11  -2   7    0.61    0.44
  11  -2   7    0.97    0.55
 -11   2   7    0.61    0.54
 -11  -2  -7    0.83    0.54
  11   2   7    0.46    0.59
  11  -2   7    0.51    0.52
  12  -2   7   12.79    0.86
  12   2   7   12.09    0.92
  12  -2   7   12.70    0.86
 -12  -2   7   12.19    0.79
 -12  -2  -7   14.28    0.83
 -12   2   7   13.63    0.88
 -13  -2   7    2.83    0.56
 -13   2   7    3.44    0.63
  13  -2   7    2.81    0.58
  13  -2   7    2.90    0.65
 -13  -2  -7    3.76    0.62
  13   2   7    3.23    0.71
 -14  -2   7    1.13    0.52
 -14   2   7    2.14    0.60
  14  -2   7    1.47    0.58
 -14  -2  -7    1.61    0.60
  14   2   7    0.99    0.69
  14  -2   7    1.21    0.68
 -15  -2   7    0.99    0.53
 -15   2   7    1.21    0.58
  15  -2   7    1.00    0.54
 -15  -2  -7    1.51    0.62
  15   2   7    0.65    0.70
  15  -2   7    0.80    0.71
 -16   2   7    1.33    0.60
 -16  -2   7    0.71    0.55
  16  -2   7    0.73    0.55
 -16  -2  -7    0.43    0.61
  16   2   7    0.65    0.69
  16  -2   7    0.13    0.73
 -17   2   7    0.61    0.61
 -17  -2   7    1.13    0.60
  17  -2   7    0.39    0.54
 -17  -2  -7    1.22    0.61
  17   2   7    0.81    0.75
  17  -2   7    0.41    0.80
 -18   2   7    0.10    0.62
 -18  -2   7    0.39    0.60
  18  -2   7    0.59    0.61
 -18  -2  -7    0.25    0.65
  18   2   7    0.38    0.75
  18  -2   7    0.52    0.83
 -19  -2   7    4.68    0.74
  19  -2   7    4.33    0.69
 -19  -2  -7    4.97    0.80
  19   2   7    5.35    0.90
  19  -2   7    4.87    0.99
 -19   2   7    5.10    0.76
 -20  -2   7    2.31    0.72
  20  -2   7    2.25    0.62
 -20  -2  -7    1.77    0.71
  20   2   7    2.40    0.83
  20  -2   7    2.08    0.94
 -20   2   7    2.11    0.67
 -21  -2   7    0.45    0.68
  21  -2   7    0.75    0.63
 -21  -2  -7    1.39    0.71
  21   2   7    0.51    0.80
 -21   2   7    0.49    0.64
  21  -2   7    0.67    1.03
  22  -2   7   10.98    0.94
 -22  -2   7    9.75    1.04
  22   2   7   10.96    1.17
  22  -2   7   10.14    1.35
 -22   2   7    9.16    0.94
 -22  -2  -7   10.99    1.04
 -23  -2   7    1.16    0.86
  23  -2   7    0.95    0.68
 -23  -2  -7    0.87    0.79
  23  -2   7    0.30    1.24
 -23   2   7    0.04    0.72
  23   2   7    0.68    0.94
  24  -2   7   -0.66    1.34
  24  -2   7    0.20    0.70
 -24  -2   7   -0.44    0.83
 -24  -2  -7    0.03    0.84
 -24   2   7    0.14    0.77
  24   2   7    0.46    0.96
 -25  -2   7    0.66    0.87
 -25  -2  -7    0.82    0.88
  25  -2   7   -0.05    1.37
 -25   2   7    1.22    0.81
  25   2   7    0.66    1.06
 -26  -2   7    2.76    0.98
 -26  -2  -7    2.62    0.92
  26  -2   7    1.29    1.39
 -26   2   7    3.64    0.86
  26   2   7    1.38    0.96
 -27  -2   7    1.13    0.92
 -27  -2  -7    0.98    0.92
 -27   2   7    1.07    0.79
  27   2   7    1.78    1.02
  27  -2   7   -0.13    1.43
  28   2   7    3.43    1.12
 -28  -2   7    4.11    1.00
 -28  -2  -7    2.81    1.02
 -28   2   7    4.62    0.90
  28  -2   7    2.04    1.40
 -29  -2  -7   -0.17    1.02
 -29   2   7    0.30    0.89
  29  -2   7   -0.43    1.45
   0  -2   8   11.73    0.86
   0  -2   8   11.69    0.54
   0  -2   8   11.53    0.72
   0   2   8   11.63    0.72
   0   2   8   10.41    0.80
  -1   2   8   18.75    0.98
  -1  -2   8   19.91    1.01
   1  -2   8   19.17    1.01
  -1  -2   8   19.66    0.66
   1   2   8   19.24    0.87
   1  -2   8   20.09    0.87
  -1   2   8   20.12    0.87
   1  -2   8   19.16    0.66
  -1  -2   8   21.29    0.90
   1   2   8   19.74    0.98
  -2  -2   8    1.88    0.57
   2  -2   8    1.62    0.58
  -2   2   8    1.60    0.58
  -2  -2   8    1.67    0.35
  -2   2   8    1.82    0.49
   2   2   8    1.53    0.59
   2  -2   8    1.28    0.36
   2   2   8    1.35    0.48
  -2  -2   8    1.40    0.49
  -3  -2   8    3.06    0.63
   3  -2   8    2.30    0.62
  -3   2   8    2.80    0.67
  -3  -2   8    2.79    0.37
  -3   2   8    2.61    0.50
   3  -2   8    2.64    0.38
   3   2   8    2.96    0.53
   3   2   8    2.49    0.60
  -3  -2   8    2.18    0.48
  -4  -2   8    6.84    0.70
   4  -2   8    7.47    0.78
  -4  -2   8    7.46    0.63
   4  -2   8    7.16    0.49
  -4   2   8    7.87    0.63
   4   2   8    7.62    0.70
  -4   2   8    7.73    0.75
   4   2   8    6.88    0.69
  -5  -2   8    1.43    0.54
   5  -2   8    2.13    0.58
  -5   2   8    2.26    0.62
  -5   2   8    2.35    0.49
   5   2   8    2.24    0.55
   5  -2   8    1.54    0.38
   5   2   8    1.24    0.58
  -5  -2   8    1.17    0.46
   6   2   8   57.96    1.42
  -6  -2   8   58.10    1.48
   6  -2   8   60.55    1.66
  -6   2   8   61.25    1.40
   6   2   8   58.54    1.51
   6  -2   8   58.63    1.18
  -6  -2   8   58.09    1.37
  -6   2   8   59.79    1.62
   7   2   8    7.83    0.70
  -7  -2   8    7.23    0.68
   7  -2   8    6.71    0.72
  -7  -2   8    6.89    0.62
  -7   2   8    7.69    0.64
   7   2   8    7.84    0.74
   7  -2   8    7.02    0.54
  -7   2   8    8.95    0.79
  -8  -2   8    0.71    0.47
  -8  -2   8    0.18    0.47
   8  -2   8    0.53    0.58
  -8   2   8    0.36    0.54
   8  -2   8    0.50    0.41
   8   2   8    0.14    0.58
   8   2   8    0.44    0.51
   9   2   8    1.47    0.49
  -9  -2   8    1.44    0.46
  -9  -2   8    1.27    0.47
   9  -2   8    1.88    0.60
  -9   2   8    1.46    0.62
   9   2   8    1.11    0.59
   9  -2   8    1.04    0.44
 -10  -2   8    0.59    0.44
 -10   2   8    0.54    0.60
 -10  -2   8    0.92    0.49
  10  -2   8    0.49    0.52
  10   2   8    0.95    0.55
  10  -2   8    0.27    0.46
  11  -2   8   17.72    1.02
  11  -2   8   16.30    0.87
 -11  -2   8   16.48    0.86
 -11   2   8   17.36    1.01
  11   2   8   17.09    1.03
 -12  -2   8    2.96    0.54
  12   2   8    2.60    0.66
 -12   2   8    3.78    0.64
  12  -2   8    2.52    0.61
  12  -2   8    2.41    0.58
 -13  -2   8    2.06    0.52
 -13   2   8    2.44    0.62
  13  -2   8    2.61    0.64
  13   2   8    4.05    0.71
  13  -2   8    2.25    0.62
 -14  -2   8    0.33    0.49
 -14   2   8    0.16    0.60
  14  -2   8    0.24    0.61
  14   2   8    0.67    0.66
  14  -2   8    0.28    0.64
 -15   2   8    0.99    0.65
 -15  -2   8    0.58    0.52
  15  -2   8    0.77    0.58
  15  -2   8    0.52    0.67
 -15  -2  -8    0.65    0.58
  15   2   8    1.28    0.69
  16  -2   8   10.26    0.88
 -16  -2  -8   10.94    0.89
  16   2   8    9.48    0.99
  16  -2   8    8.51    0.94
 -16  -2   8    9.35    0.83
 -16   2   8   10.74    0.94
  17  -2   8   14.98    1.02
 -17  -2   8   14.70    0.98
  17   2   8   13.00    1.08
  17  -2   8   13.28    1.13
 -17   2   8   15.46    1.07
 -17  -2  -8   15.31    1.01
  18  -2   8   23.52    1.22
  18   2   8   25.85    1.44
  18  -2   8   25.62    1.48
 -18  -2   8   24.43    1.23
 -18   2   8   25.13    1.28
 -18  -2  -8   27.51    1.28
 -19  -2   8    2.36    0.69
  19  -2   8    3.16    0.74
 -19  -2  -8    3.44    0.76
  19   2   8    2.48    0.85
  19  -2   8    3.51    0.94
 -19   2   8    2.12    0.71
 -20  -2   8    0.34    0.71
  20  -2   8   -0.22    0.63
 -20  -2  -8    0.55    0.73
  20   2   8    0.41    0.82
  20  -2   8    0.20    0.91
 -20   2   8    0.00    0.69
 -21  -2   8    0.40    0.73
  21  -2   8    0.12    0.68
 -21  -2  -8    1.05    0.78
  21   2   8    0.90    0.90
 -21   2   8    0.47    0.69
  21  -2   8    1.11    0.95
 -22  -2   8    0.28    0.80
  22  -2   8    0.41    0.73
 -22  -2  -8    0.22    0.80
 -22   2   8    0.57    0.73
  22   2   8    1.41    0.98
  22  -2   8    0.85    1.00
 -23  -2   8    6.89    0.96
  23  -2   8    5.97    0.89
 -23  -2  -8    5.60    0.96
 -23   2   8    8.28    0.99
  23  -2   8    7.35    1.29
  23   2   8    8.31    1.16
 -24  -2   8    0.41    0.85
  24  -2   8    1.39    0.77
 -24  -2  -8    0.74    0.84
  24   2   8    0.26    0.99
  24  -2   8    1.17    1.14
 -24   2   8    0.57    0.78
 -25  -2   8    1.27    0.87
 -25  -2  -8    1.65    0.89
 -25   2   8    1.51    0.82
  25   2   8    1.82    1.03
  25  -2   8    2.60    1.19
 -26  -2   8    0.48    0.95
 -26  -2  -8    0.01    0.95
  26   2   8    1.24    1.05
 -26   2   8    0.25    0.83
  26  -2   8    0.68    1.14
 -27  -2   8    0.86    0.94
 -27  -2  -8    1.54    0.95
 -27   2   8    1.25    0.87
  27  -2   8    1.65    1.18
  28  -2   8    9.81    1.50
   0  -2   9    0.47    0.57
   0   2   9    0.08    0.48
   0   2   9   -0.05    0.56
   0  -2   9   -0.16    0.33
   0  -2   9    0.34    0.46
  -1  -2   9   11.05    0.87
   1  -2   9   11.83    0.91
  -1  -2   9   11.18    0.72
   1   2   9   10.12    0.79
  -1  -2   9   10.86    0.56
   1   2   9   11.13    0.74
  -1   2   9   11.95    0.75
   1  -2   9   10.67    0.56
  -1   2   9   11.12    0.85
  -2  -2   9    2.16    0.60
   2  -2   9    1.83    0.63
  -2   2   9    1.59    0.60
   2   2   9    1.82    0.58
  -2  -2   9    2.23    0.38
  -2   2   9    1.82    0.48
   2  -2   9    2.15    0.39
   2   2   9    1.63    0.51
  -2  -2   9    1.41    0.49
  -3  -2   9   10.29    0.84
   3  -2   9   10.46    0.89
  -3  -2   9    9.04    0.67
  -3  -2   9    8.92    0.53
  -3   2   9    9.42    0.70
   3  -2   9    9.04    0.55
   3   2   9    8.85    0.70
  -3   2   9    8.25    0.81
   3   2   9    9.34    0.77
  -4  -2   9    1.79    0.61
   4  -2   9    3.34    0.70
  -4   2   9    2.53    0.62
   4   2   9    2.61    0.55
   4   2   9    2.20    0.58
  -4   2   9    1.66    0.47
   4  -2   9    2.42    0.39
  -4  -2   9    1.97    0.49
  -5  -2   9   39.27    1.37
   5  -2   9   39.58    1.44
  -5  -2   9   39.80    1.20
  -5   2   9   39.14    1.20
   5  -2   9   37.25    0.99
   5   2   9   38.10    1.29
  -5   2   9   40.55    1.44
   5   2   9   36.88    1.23
   6   2   9    2.14    0.59
  -6  -2   9    2.18    0.59
   6  -2   9    2.01    0.65
  -6   2   9    2.43    0.66
   6   2   9    2.00    0.55
  -6   2   9    2.50    0.53
   6  -2   9    1.54    0.43
  -6  -2   9    1.77    0.49
  -7  -2   9   10.59    0.82
   7  -2   9   11.06    0.92
  -7  -2   9   10.56    0.73
  -7   2   9   10.81    0.73
   7   2   9   10.66    0.76
   7   2   9    9.15    0.81
   7  -2   9   11.01    0.66
  -7   2   9   11.45    0.90
  -8  -2   9    6.03    0.70
   8  -2   9    6.10    0.78
   8  -2   9    5.89    0.57
   8   2   9    5.73    0.73
  -8  -2   9    5.97    0.63
  -8   2   9    6.47    0.80
  -9  -2   9    0.43    0.46
  -9   2   9    0.18    0.61
  -9  -2   9    0.19    0.57
   9  -2   9    0.33    0.59
   9   2   9    0.00    0.57
   9  -2   9    0.77    0.45
 -10  -2   9    2.24    0.52
 -10   2   9    2.30    0.65
  10  -2   9    2.05    0.68
  10   2   9    2.08    0.68
  10  -2   9    2.08    0.53
 -11  -2   9    1.22    0.49
 -11   2   9    2.81    0.73
  11  -2   9    2.69    0.68
  11   2   9    2.03    0.66
  11  -2   9    2.11    0.55
 -12  -2   9    3.12    0.57
 -12   2   9    2.64    0.66
  12   2   9    3.06    0.69
  12  -2   9    2.78    0.71
  12  -2   9    2.20    0.59
  13  -2   9    7.43    0.83
  13   2   9    7.19    0.84
  13  -2   9    8.15    0.78
 -13  -2   9    7.77    0.73
 -13   2   9    9.01    0.91
 -14   2   9    0.29    0.67
 -14  -2   9    0.02    0.52
  14  -2   9   -0.06    0.62
  14   2   9   -0.13    0.65
  14  -2   9    0.43    0.63
  15  -2   9   19.62    1.18
  15   2   9   19.42    1.22
  15  -2   9   20.39    1.17
 -15  -2   9   21.69    1.08
 -15   2   9   22.08    1.22
 -16  -2   9    0.10    0.54
  16  -2   9    0.44    0.68
  16   2   9    0.72    0.76
  16  -2   9    0.56    0.72
 -16   2   9    0.32    0.70
 -17  -2   9    2.56    0.66
  17  -2   9    1.62    0.67
  17   2   9    1.68    0.73
  17  -2   9    2.50    0.78
 -17   2   9    1.22    0.70
 -18  -2   9    0.05    0.60
  18  -2   9    0.17    0.66
  18   2   9    0.22    0.77
  18  -2   9    0.12    0.83
 -18   2   9   -0.06    0.70
 -19  -2   9    4.97    0.78
  19  -2   9    5.77    0.89
 -19   2   9    5.54    0.85
  19   2   9    5.77    0.99
  19  -2   9    4.94    0.99
 -20  -2   9    2.72    0.76
  20  -2   9    2.10    0.76
  20  -2   9    2.86    0.97
  20   2   9    2.76    0.95
 -20   2   9    3.08    0.86
  21  -2   9    6.76    0.95
 -21  -2   9    6.77    0.91
 -21   2   9    6.44    1.00
  21   2   9    6.94    1.10
  21  -2   9    6.00    1.09
  22  -2   9    8.83    1.02
 -22  -2   9    7.75    0.97
 -22   2   9    7.30    1.03
  22   2   9    7.29    1.13
  22  -2   9    8.04    1.24
  23  -2   9    7.34    0.99
 -23   2   9    5.95    0.98
  23   2   9    6.58    1.11
 -23  -2   9    7.17    0.98
  23  -2   9    6.59    1.27
 -24  -2   9    0.40    0.85
  24  -2   9    0.45    0.84
 -24   2   9    0.66    0.79
  24   2   9    0.04    1.04
  24  -2   9    0.55    1.17
 -25  -2   9    6.57    1.03
  25  -2   9    7.31    1.05
 -25   2   9    6.37    1.02
  25   2   9    6.84    1.17
  25  -2   9    5.31    1.28
  26  -2   9    0.56    1.18
  27  -2   9   23.42    1.86
   0  -2  10    1.28    0.64
   0   2  10    0.43    0.63
   0  -2  10    0.59    0.49
   0  -2  10    0.24    0.38
   0   2  10    0.33    0.54
  -1  -2  10   20.22    1.16
   1  -2  10   24.97    1.27
  -1  -2  10   21.82    0.80
  -1  -2  10   23.54    1.01
   1  -2  10   22.71    0.82
  -1   2  10   21.68    1.00
   1   2  10   20.66    1.01
  -1   2  10   21.04    1.12
   1   2  10   22.92    1.13
  -2  -2  10    0.17    0.63
   2  -2  10    0.56    0.67
  -2   2  10   -0.22    0.66
   2   2  10    0.17    0.61
  -2  -2  10    0.05    0.39
  -2   2  10    0.05    0.51
   2  -2  10    0.16    0.37
   2   2  10    0.06    0.51
  -2  -2  10    0.13    0.48
  -3   2  10    2.74    0.72
  -3  -2  10    2.98    0.69
   3  -2  10    4.72    0.79
   3   2  10    2.82    0.64
   3  -2  10    3.05    0.48
  -3  -2  10    3.03    0.43
  -3   2  10    3.08    0.60
   3   2  10    2.98    0.58
  -3  -2  10    3.61    0.57
  -4  -2  10   17.01    1.06
   4  -2  10   19.15    1.18
  -4  -2  10   16.85    0.89
   4   2  10   16.40    0.97
  -4   2  10   15.56    0.88
   4  -2  10   15.52    0.73
   4   2  10   16.89    0.96
  -4   2  10   15.85    1.06
  -5   2  10    0.21    0.54
  -5   2  10    0.16    0.65
  -5  -2  10    0.42    0.65
   5  -2  10    0.17    0.71
   5   2  10    0.23    0.54
   5   2  10   -0.02    0.55
   5  -2  10    0.14    0.39
  -5  -2  10    0.04    0.50
  -6  -2  10  117.26    2.39
   6  -2  10  127.77    2.65
  -6   2  10  119.29    2.13
   6  -2  10  118.72    1.83
   6   2  10  116.05    2.28
  -6  -2  10  119.70    2.07
  -6   2  10  125.29    2.51
  -7  -2  10    0.21    0.50
  -7   2  10    0.67    0.64
  -7  -2  10    0.57    0.63
   7  -2  10    0.02    0.61
  -7   2  10    0.03    0.51
   7   2  10    0.86    0.63
   7  -2  10   -0.34    0.45
  -8   2  10    2.22    0.71
  -8  -2  10    1.71    0.63
   8  -2  10    1.25    0.70
   8   2  10    1.60    0.62
   8  -2  10    1.39    0.49
  -8  -2  10    1.67    0.53
  -9   2  10    1.78    0.71
   9  -2  10    1.09    0.62
   9   2  10    1.16    0.63
   9  -2  10    1.31    0.49
  -9  -2  10    1.63    0.53
 -10   2  10    0.64    0.62
  10  -2  10    0.84    0.74
  10   2  10    0.44    0.60
  10  -2  10   -0.30    0.51
 -10  -2  10   -0.05    0.52
  11  -2  10   47.33    1.75
  11   2  10   44.72    1.62
  11  -2  10   43.22    1.35
 -11  -2  10   46.44    1.41
 -11   2  10   49.68    1.74
 -12  -2  10    0.21    0.52
 -12   2  10    0.47    0.68
  12  -2  10   -0.05    0.67
  12   2  10   -0.18    0.68
  12  -2  10    0.29    0.57
 -13  -2  10    0.23    0.50
  13  -2  10   -0.06    0.68
  13   2  10    0.55    0.67
  13  -2  10    0.13    0.57
 -13   2  10    0.20    0.72
 -14  -2  10    0.82    0.55
  14  -2  10    0.60    0.70
  14   2  10    1.10    0.70
  14  -2  10    0.71    0.62
 -14   2  10   -0.02    0.68
 -15  -2  10    0.10    0.56
  15  -2  10   -0.01    0.74
  15   2  10   -0.12    0.73
  15  -2  10    0.14    0.66
 -15   2  10    0.07    0.75
  16  -2  10   28.31    1.47
  16   2  10   30.20    1.51
  16  -2  10   28.57    1.39
 -16  -2  10   27.54    1.26
 -16   2  10   30.20    1.49
 -17  -2  10    0.20    0.63
  17  -2  10    0.43    0.74
  17   2  10    0.44    0.76
  17  -2  10    0.24    0.77
 -17   2  10    0.51    0.81
  18  -2  10   34.40    1.64
  18   2  10   32.29    1.62
  18  -2  10   30.33    1.56
 -18  -2  10   31.66    1.39
 -18   2  10   31.78    1.58
 -19  -2  10   -0.02    0.70
  19  -2  10    0.28    0.83
  19   2  10    0.20    0.91
 -19   2  10    0.47    0.83
  19  -2  10   -0.43    0.86
 -20  -2  10    2.14    0.75
  20  -2  10    2.05    0.91
 -20   2  10    2.39    0.91
  20   2  10    2.32    0.96
  20  -2  10    1.62    0.97
 -21  -2  10    4.35    0.87
  21  -2  10    3.49    0.92
 -21   2  10    4.48    0.92
  21   2  10    6.08    1.12
  21  -2  10    3.73    1.05
 -22  -2  10    4.38    0.88
  22  -2  10    3.74    0.94
 -22   2  10    4.18    0.91
  22   2  10    3.93    1.03
  22  -2  10    3.64    1.10
 -23  -2  10    5.78    0.95
  23  -2  10    5.43    1.01
 -23   2  10    5.92    1.04
  23   2  10    6.78    1.16
  23  -2  10    6.48    1.24
 -24  -2  10    2.56    0.92
  24  -2  10    2.70    0.93
  24  -2  10    1.97    1.17
  25  -2  10    0.83    0.93
  25  -2  10    0.52    1.23
   0   2  11   -0.09    0.65
   0  -2  11    0.03    0.72
   0   2  11   -0.06    0.54
  -1   2  11    2.37    0.71
   1   2  11    2.24    0.66
  -1  -2  11    2.62    0.77
   1  -2  11    3.47    0.82
  -1   2  11    2.23    0.57
   1   2  11    3.27    0.63
  -2   2  11    0.12    0.66
   2   2  11    0.05    0.65
  -2  -2  11   -0.31    0.69
   2  -2  11   -0.05    0.69
  -2   2  11   -0.11    0.52
   2  -2  11   -0.27    0.43
   2   2  11    0.15    0.54
  -2  -2  11    0.40    0.50
  -3   2  11    0.82    0.66
   3   2  11    0.87    0.62
  -3  -2  11    0.94    0.70
   3  -2  11    1.35    0.73
   3  -2  11    0.95    0.43
  -3   2  11    1.15    0.53
   3   2  11    0.58    0.53
  -3  -2  11    0.60    0.50
  -4  -2  11    7.22    0.90
   4  -2  11    7.36    0.95
  -4   2  11    7.71    0.74
  -4  -2  11    6.83    0.69
   4  -2  11    7.10    0.60
   4   2  11    7.53    0.78
  -4   2  11    7.83    0.89
  -5  -2  11    6.92    0.88
   5  -2  11    7.62    0.93
  -5   2  11    8.02    0.74
  -5  -2  11    7.15    0.71
   5  -2  11    7.55    0.63
   5   2  11    6.84    0.79
  -5   2  11    7.42    0.88
  -6   2  11    4.22    0.78
  -6  -2  11    4.29    0.83
   6  -2  11    5.06    0.84
   6  -2  11    3.80    0.52
  -6   2  11    4.30    0.65
   6   2  11    4.11    0.70
  -6  -2  11    4.05    0.63
  -7   2  11    2.93    0.75
  -7  -2  11    1.86    0.72
   7  -2  11    2.39    0.74
   7  -2  11    1.47    0.48
  -7   2  11    2.67    0.60
   7   2  11    2.03    0.65
  -7  -2  11    1.93    0.55
  -8   2  11    0.96    0.70
  -8  -2  11    0.33    0.71
   8  -2  11    0.44    0.79
   8  -2  11    0.94    0.48
   8   2  11    1.28    0.63
  -8  -2  11    0.85    0.53
  -9   2  11    0.77    0.71
   9  -2  11    1.08    0.69
   9   2  11    1.26    0.68
   9  -2  11    0.75    0.49
  -9  -2  11    1.05    0.54
  10  -2  11    6.28    0.95
  10  -2  11    5.06    0.63
 -10  -2  11    5.22    0.67
  10   2  11    5.21    0.82
 -10   2  11    6.32    0.91
  11  -2  11    0.92    0.73
  11   2  11    1.31    0.69
  11  -2  11    0.35    0.55
 -11   2  11    0.73    0.78
 -11  -2  11    0.57    0.55
  12  -2  11   11.07    1.12
  12   2  11    9.05    0.97
  12  -2  11    8.84    0.81
 -12  -2  11    9.10    0.79
 -12   2  11    8.62    0.98
  13  -2  11    7.24    1.01
  13  -2  11    5.46    0.75
 -13  -2  11    4.97    0.70
 -13   2  11    7.06    0.95
  13   2  11    6.00    0.92
 -14  -2  11    3.47    0.69
  14  -2  11    3.25    0.86
  14   2  11    2.64    0.83
  14  -2  11    2.89    0.71
 -14   2  11    3.98    0.94
 -15  -2  11    0.60    0.61
  15  -2  11    0.80    0.79
  15   2  11    0.82    0.76
  15  -2  11    0.84    0.71
 -15   2  11    1.11    0.78
  16  -2  11   12.44    1.19
  16   2  11   10.23    1.13
  16  -2  11   10.06    0.99
 -16  -2  11   12.18    0.96
 -16   2  11   10.97    1.15
  17  -2  11   11.26    1.17
  17   2  11    9.67    1.09
  17  -2  11    8.73    1.01
 -17  -2  11   10.58    0.94
 -17   2  11   10.66    1.17
 -18  -2  11    3.71    0.74
  18  -2  11    5.37    0.98
 -18   2  11    4.19    0.97
  18   2  11    4.08    0.96
 -19  -2  11    0.53    0.67
 -19   2  11    0.88    0.89
  19  -2  11    0.82    0.88
  19   2  11    1.65    0.94
 -20  -2  11    0.12    0.73
  20  -2  11    0.16    0.93
 -20   2  11    0.34    0.88
  20   2  11    0.91    0.93
 -21  -2  11    1.25    0.73
  21  -2  11    1.67    0.90
 -21   2  11    1.56    0.94
  21   2  11    1.09    0.94
 -22  -2  11    2.30    0.82
  22  -2  11    1.98    0.95
   0   2  12    1.19    0.71
   0  -2  12    0.63    0.80
   0   2  12    0.46    0.58
  -1   2  12    2.35    0.77
   1   2  12    2.57    0.67
   1   2  12    2.24    0.72
  -1  -2  12    3.07    0.89
   1  -2  12    2.90    0.89
  -1   2  12    2.47    0.63
  -2   2  12    2.76    0.78
  -2  -2  12    2.21    0.83
   2  -2  12    1.10    0.78
  -2   2  12    2.24    0.65
   2   2  12    2.48    0.69
  -3   2  12    0.16    0.76
  -3  -2  12    0.28    0.81
   3  -2  12    0.22    0.79
  -3   2  12    0.14    0.63
   3   2  12   -0.13    0.60
  -3  -2  12    1.20    0.55
  -4   2  12    0.50    0.72
  -4  -2  12    1.62    0.81
   4  -2  12    0.33    0.81
  -4   2  12    0.32    0.62
   4   2  12    0.61    0.61
  -4  -2  12    0.25    0.56
  -5   2  12    2.74    0.81
  -5  -2  12    3.11    0.88
   5  -2  12    3.30    0.88
  -5   2  12    3.08    0.66
   5   2  12    2.62    0.69
  -5  -2  12    3.00    0.62
  -6  -2  12   11.23    1.11
   6  -2  12   12.57    1.19
  -6  -2  12   10.63    0.84
  -6   2  12   11.27    0.90
   6   2  12   10.34    0.95
  -6   2  12   10.54    1.06
  -7  -2  12    2.27    0.85
   7  -2  12    2.39    0.84
  -7   2  12    3.11    0.69
   7   2  12    2.66    0.71
  -7  -2  12    2.93    0.64
  -7   2  12    2.84    0.82
   8  -2  12    0.93    0.79
   8   2  12    0.42    0.72
  -8  -2  12    0.57    0.57
  -8   2  12    0.22    0.83
   9  -2  12    3.82    0.96
   9   2  12    4.21    0.85
  -9  -2  12    4.39    0.68
  -9   2  12    4.76    0.94
  10   2  12    0.23    0.79
  10  -2  12    0.15    0.81
 -10   2  12   -0.04    0.87
 -10  -2  12    0.20    0.61
  11  -2  12   12.18    1.25
  11   2  12   12.59    1.12
 -11  -2  12   10.86    0.89
 -11   2  12   13.14    1.21
  12  -2  12    1.42    0.86
  12   2  12    1.14    0.83
 -12   2  12    0.82    0.85
 -12  -2  12    0.56    0.61
  13  -2  12   -0.03    0.95
  13   2  12   -0.12    0.81
 -13   2  12    0.02    0.86
 -13  -2  12   -0.22    0.63
  14  -2  12   -0.48    0.96
  14   2  12   -0.30    0.79
 -14   2  12   -0.20    0.85
 -14  -2  12   -0.29    0.63
  15  -2  12    0.70    0.90
  15   2  12   -0.01    0.88
 -15   2  12    0.33    0.93
 -15  -2  12   -0.11    0.66
  16  -2  12    3.94    0.97
 -16   2  12    4.43    1.02
  16   2  12    2.96    0.89
 -16  -2  12    3.74    0.77
 -17  -2  12   -0.03    0.70
 -17   2  12   -0.11    0.91
  17  -2  12    0.81    0.91
  17   2  12    1.58    0.88
 -18  -2  12   -0.10    0.72
  18  -2  12    0.02    0.94
 -18   2  12    0.56    1.00
  18   2  12    0.53    0.90
 -19  -2  12    0.24    0.76
  19  -2  12    0.12    0.95
 -20  -2  12    2.80    0.78
   0  -2  13    0.27    0.92
   0   2  13    0.18    0.71
  -1  -2  13    2.41    0.96
   1  -2  13    2.17    1.00
  -1   2  13    2.05    0.66
   1   2  13    1.61    0.67
  -1   2  13    1.34    0.82
  -2  -2  13    1.18    0.92
   2  -2  13    1.12    0.91
   2   2  13    1.87    0.72
  -2   2  13    1.40    0.66
  -2   2  13    1.65    0.86
  -3   2  13    0.54    0.67
  -3  -2  13    0.27    0.91
   3  -2  13    0.12    0.92
   3   2  13    0.00    0.70
  -3   2  13   -0.03    0.86
  -4  -2  13    0.69    0.92
   4  -2  13    1.28    1.02
  -4  -2  13    0.31    0.61
  -4   2  13    1.38    0.65
   4   2  13    1.39    0.76
  -4   2  13    1.23    0.89
  -5  -2  13    1.34    0.94
   5  -2  13    1.72    1.02
  -5   2  13    1.82    0.67
   5   2  13    1.73    0.75
  -5  -2  13    1.74    0.62
  -5   2  13    1.64    0.85
  -6   2  13    1.49    0.91
  -6  -2  13    1.00    0.59
  -6  -2  13    0.99    0.94
   6  -2  13    1.22    0.96
  -6   2  13    1.20    0.69
   6   2  13    0.10    0.76
   7  -2  13    3.49    1.05
  -7   2  13    2.64    0.74
   7   2  13    3.01    0.82
  -7  -2  13    3.03    0.68
  -7   2  13    2.62    0.94
   8  -2  13   -0.44    0.97
   8   2  13    0.38    0.79
  -8   2  13    0.35    0.88
  -8  -2  13   -0.19    0.61
   9  -2  13    0.97    0.93
   9   2  13    0.42    0.80
  -9   2  13    0.27    0.88
  -9  -2  13    0.53    0.61
  10  -2  13    1.91    1.04
  10   2  13    2.14    0.84
 -10   2  13    2.26    0.93
 -10  -2  13    2.49    0.68
  11  -2  13    1.26    0.97
  11   2  13    1.63    0.86
 -11   2  13    2.29    0.98
 -11  -2  13    2.10    0.69
  12  -2  13    0.59    1.03
  12   2  13    1.00    0.82
 -12   2  13    1.39    0.92
 -12  -2  13    0.91    0.64
  13  -2  13    0.65    0.99
  13   2  13   -0.15    0.77
 -13   2  13    0.66    0.95
 -13  -2  13   -0.15    0.64
  14  -2  13    0.55    1.03
 -14   2  13    0.03    0.94
  14   2  13    0.11    0.90
 -14  -2  13    0.19    0.68
  15  -2  13    5.51    1.12
 -15   2  13    5.74    1.07
  15   2  13    5.67    1.00
 -15  -2  13    4.59    0.79
 -16  -2  13    0.09    0.67
 -17  -2  13    2.67    0.79
 -18  -2  13    0.33    0.75
   0  -2  14   62.58    2.47
   0   2  14   61.17    1.98
  -1  -2  14   26.51    1.79
   1  -2  14   27.55    1.80
  -1   2  14   27.32    1.43
   1   2  14   24.37    1.39
  -2  -2  14    3.32    1.10
   2  -2  14    2.31    1.06
  -2   2  14    2.74    0.79
   2   2  14    1.60    0.78
  -3  -2  14    0.93    1.05
   3  -2  14    1.05    1.11
  -3   2  14    0.85    0.76
   3   2  14    1.29    0.78
  -3   2  14    0.42    0.99
  -4  -2  14    0.04    1.06
   4  -2  14    1.08    1.07
  -4   2  14   -0.06    0.72
   4   2  14    0.32    0.83
  -4   2  14   -0.38    0.96
  -5   2  14    1.46    0.77
   5  -2  14    2.10    1.05
   5   2  14    0.78    0.84
  -5   2  14    1.09    0.95
   6  -2  14    0.88    1.03
  -6   2  14    1.07    0.70
  -6  -2  14    2.03    0.68
   6   2  14    1.15    0.79
  -6   2  14    1.30    0.98
   7  -2  14    3.12    1.05
   7   2  14    2.79    0.82
  -7   2  14    3.12    1.03
  -7  -2  14    3.87    0.73
   8  -2  14    1.76    1.08
   8   2  14    1.04    0.77
  -8   2  14    1.92    1.05
  -8  -2  14    0.97    0.67
   9  -2  14    0.35    1.14
   9   2  14    0.64    0.79
  -9   2  14    0.56    1.05
  -9  -2  14    0.10    0.72
  10  -2  14    7.46    1.32
 -10  -2  14    6.66    0.86
  10   2  14    7.54    1.07
 -10   2  14    7.33    1.21
 -11  -2  14   45.66    1.64
 -11   2  14   49.33    2.20
 -12  -2  14   11.14    0.99
 -12   2  14   12.80    1.39
 -13  -2  14    3.66    0.79
 -14  -2  14   -0.13    0.73
 -15  -2  14    0.17    0.73
   0  -2  15   -0.09    1.16
  -1  -2  15    0.03    1.11
   1  -2  15    0.74    1.06
  -2  -2  15    0.34    1.13
   2  -2  15    1.33    1.13
  -3  -2  15    1.24    1.06
   3  -2  15    1.04    1.03
   4  -2  15    7.05    1.32
  -6   2  15    1.04    1.05
  -7   2  15    0.33    1.06
  -8   2  15    2.81    1.12
   0  -3   0    0.49    0.45
   0  -3   0    0.40    0.28
   1  -3   0    0.34    0.52
  -1  -3   0    0.28    0.53
   1  -3   0    0.03    0.24
  -1  -3   0   -0.05    0.28
   2  -3   0    2.22    0.51
  -2  -3   0    2.44    0.51
   2   3   0    2.03    0.14
   2  -3   0    2.38    0.32
  -2  -3   0    2.30    0.35
  -3  -3   0    0.22    0.30
   3  -3   0    0.25    0.43
  -3  -3   0    0.57    0.51
   3   3   0   -0.02    0.13
  -4  -3   0    2.13    0.35
   4  -3   0    1.71    0.46
   4   3   0    1.35    0.19
  -5  -3   0    0.26    0.34
   5  -3   0    0.57    0.47
   5   3   0    0.15    0.21
  -6  -3   0    0.08    0.37
   6  -3   0    0.36    0.51
   6   3   0    0.26    0.28
  -7  -3   0    0.03    0.39
  -7   3   0    0.56    0.57
   7  -3   0    0.32    0.51
   7   3   0    0.12    0.32
   8  -3   0   11.60    0.70
  -8   3   0   11.24    0.77
   8   3   0   10.69    0.56
  -8  -3   0   10.06    0.63
  -9   3   0    0.51    0.58
  -9  -3   0    0.29    0.46
   9  -3   0    0.04    0.51
   9   3   0    0.25    0.42
  10  -3   0   11.84    0.72
 -10   3   0   13.11    0.83
 -10  -3   0   12.54    0.77
  10   3   0   13.46    0.69
 -11   3   0   -0.14    0.58
 -11  -3   0    0.10    0.55
  11  -3   0    0.08    0.51
  11   3   0   -0.13    0.56
 -12  -3   0    1.45    0.60
  12  -3   0    1.28    0.52
 -12   3   0    1.19    0.57
  12   3   0    0.59    0.62
 -13  -3   0    0.02    0.57
  13  -3   0    0.14    0.44
 -13   3   0   -0.10    0.54
  13   3   0   -0.22    0.58
 -14  -3   0    4.40    0.72
 -14   3   0    3.82    0.60
  14  -3   0    3.37    0.50
  14   3   0    3.40    0.65
 -15   3   0    0.47    0.45
 -15  -3   0    0.01    0.61
  15  -3   0    0.07    0.42
  15   3   0   -0.14    0.58
 -16  -3   0    1.45    0.66
  16  -3   0    1.30    0.45
 -16   3   0    1.39    0.50
  16   3   0    1.55    0.65
 -17  -3   0    0.16    0.68
  17  -3   0    0.08    0.44
 -17   3   0   -0.02    0.47
  17   3   0    0.24    0.70
 -18   3   0    1.28    0.49
 -18  -3   0    1.78    0.74
  18  -3   0    1.36    0.46
  18   3   0    1.06    0.69
 -19   3   0   -0.02    0.47
 -19  -3   0   -0.08    0.70
  19  -3   0    0.14    0.44
  19   3   0    0.13    0.76
  20  -3   0    7.73    0.65
  20   3   0    8.28    0.95
 -20  -3   0    7.02    0.91
 -20   3   0    8.22    0.68
 -21  -3   0    0.30    0.75
  21   3   0    0.12    0.81
  22   3   0   30.98    1.50
 -22  -3   0   28.48    1.50
 -23  -3   0    0.30    0.77
  23   3   0    0.48    0.90
 -24  -3   0    4.28    0.90
  24   3   0    3.29    0.96
 -25  -3   0    0.56    0.82
  25   3   0    0.37    0.94
 -26  -3   0    1.53    0.87
  26   3   0    2.25    1.01
 -27  -3   0   -0.13    0.90
  27   3   0   -0.33    1.05
 -28  -3   0    1.30    0.93
 -29  -3   0    0.18    0.96
 -30   3   0    1.04    1.11
   0  -3   1   17.94    0.81
   0   3   1   17.30    0.41
   0  -3  -1   16.93    0.52
   0  -3   1   17.42    0.62
   1  -3   1   26.71    0.96
  -1  -3   1   26.29    0.96
   1   3   1   23.64    0.47
   1  -3   1   24.85    0.72
  -1  -3  -1   25.91    0.63
  -1  -3   1   28.11    0.76
   2  -3   1    3.72    0.52
  -2  -3   1    4.51    0.59
   2  -3   1    4.48    0.40
   2   3   1    4.28    0.26
  -2  -3   1    4.19    0.42
  -2  -3  -1    4.07    0.34
  -3  -3   1    0.55    0.33
  -3  -3  -1    0.60    0.29
   3  -3   1    0.96    0.49
  -3  -3   1    0.43    0.52
   3   3   1    0.32    0.21
   3  -3  -1    0.46    0.47
  -4  -3   1    0.27    0.35
  -4  -3  -1    0.50    0.32
   4  -3   1    1.14    0.53
  -4  -3   1    1.32    0.54
   4  -3  -1    1.00    0.46
   4   3  -1    0.41    0.07
   4   3   1    0.41    0.24
  -5  -3   1    0.72    0.37
  -5  -3  -1    0.77    0.34
   5  -3   1    0.75    0.52
  -5  -3   1    0.38    0.56
   5  -3  -1    0.73    0.47
   5   3   1    0.69    0.28
   5   3  -1    0.52    0.15
   6  -3   1  174.88    2.19
  -6  -3   1  165.56    2.21
   6  -3  -1  171.73    2.15
  -6   3   1  175.26    2.35
   6   3   1  172.70    1.59
   6   3  -1  171.05    1.24
  -6  -3   1  174.53    1.99
  -6  -3  -1  178.06    1.88
   7  -3   1   11.03    0.73
   7  -3  -1   11.45    0.69
  -7  -3   1   10.67    0.75
  -7   3   1   11.12    0.82
   7   3   1   10.74    0.55
   7   3  -1   11.06    0.47
  -7  -3   1   11.10    0.64
  -7  -3  -1   10.69    0.60
  -8  -3   1    1.23    0.43
  -8  -3  -1    1.44    0.43
   8  -3   1    1.70    0.52
   8  -3  -1    1.67    0.52
  -8  -3   1    1.66    0.58
  -8   3   1    1.17    0.60
   8   3   1    1.30    0.41
   8   3  -1    1.77    0.38
  -9   3   1    5.60    0.69
   9  -3   1    6.53    0.60
   9  -3  -1    6.56    0.60
  -9  -3   1    5.74    0.65
  -9   3  -1    7.18    0.70
   9   3  -1    6.17    0.54
   9   3   1    5.90    0.56
  -9  -3   1    6.85    0.61
  -9  -3  -1    6.68    0.60
 -10  -3   1    2.12    0.53
 -10   3  -1    1.92    0.58
 -10  -3  -1    1.86    0.55
  10  -3   1    1.45    0.50
  10  -3  -1    1.49    0.51
 -10  -3   1    1.81    0.59
  10   3   1    1.51    0.50
 -10   3   1    1.40    0.61
  10   3  -1    1.37    0.51
 -11   3   1   77.57    1.63
  11  -3   1   78.91    1.54
 -11  -3   1   74.65    1.66
 -11   3  -1   81.58    1.59
  11  -3  -1   79.14    1.53
 -11  -3   1   76.23    1.60
  11   3   1   71.72    1.46
  11   3  -1   79.69    1.44
 -11  -3  -1   77.16    1.67
 -12   3  -1    0.65    0.54
 -12  -3   1    0.78    0.56
 -12  -3  -1    0.63    0.59
  12  -3   1    0.44    0.45
 -12   3   1    0.71    0.59
  12  -3  -1    0.25    0.51
 -12  -3   1    0.70    0.56
  12   3   1    0.99    0.56
  12   3  -1    0.42    0.58
 -13  -3   1    0.77    0.56
 -13  -3  -1    0.23    0.57
 -13   3   1    0.31    0.57
  13  -3   1    0.60    0.44
  13  -3  -1    0.37    0.48
 -13  -3   1    0.60    0.52
 -13   3  -1    0.53    0.52
  13   3   1    0.02    0.56
  13   3  -1    0.24    0.57
 -14   3   1   10.20    0.73
 -14   3  -1   11.03    0.72
  14  -3   1   10.34    0.69
  14  -3  -1   10.85    0.70
 -14  -3   1    9.81    0.70
  14   3   1   11.22    0.85
  14   3  -1   10.65    0.78
 -14  -3   1   10.41    0.85
 -14  -3  -1   10.05    0.87
 -15   3   1   11.50    0.75
 -15   3  -1   11.25    0.71
  15  -3  -1   13.35    0.74
  15  -3   1   13.01    0.74
 -15  -3   1    9.92    0.70
  15   3   1   12.28    0.90
  15   3  -1   13.57    0.86
 -15  -3   1   12.25    0.95
 -15  -3  -1   12.20    0.94
 -16   3   1   68.76    1.55
 -16   3  -1   70.30    1.47
  16  -3   1   64.27    1.47
  16  -3  -1   70.24    1.47
  16   3   1   70.00    1.75
  16   3  -1   67.61    1.66
 -16  -3   1   63.98    1.86
 -16  -3  -1   64.31    1.84
 -17   3  -1    6.44    0.59
  17  -3   1    6.46    0.62
  17  -3  -1    7.12    0.61
 -17  -3  -1    5.67    0.81
  17   3   1    7.22    0.85
  17   3  -1    7.05    0.82
 -17  -3   1    6.41    0.84
 -17   3   1    6.82    0.66
  18  -3   1    8.07    0.66
  18  -3  -1    7.78    0.62
  18   3   1    8.33    0.92
  18   3  -1    8.05    0.85
 -18  -3   1    8.22    0.94
 -18  -3  -1    7.87    0.90
 -18   3   1    8.04    0.69
 -18   3  -1    7.68    0.63
  19  -3   1   10.43    0.72
  19  -3  -1    9.27    0.67
  19   3   1   10.70    0.99
  19   3  -1    9.88    0.94
 -19  -3   1    8.82    0.96
 -19  -3  -1    9.13    0.95
 -19   3   1   10.07    0.74
  20  -3   1    4.72    0.57
 -20  -3   1    4.77    0.85
 -20  -3  -1    4.51    0.80
 -20   3   1    4.85    0.63
  20   3   1    4.14    0.85
  20   3  -1    5.10    0.88
 -21  -3   1    0.04    0.76
 -21  -3  -1    0.19    0.72
 -21   3   1    0.67    0.54
  21  -3   1    0.24    0.48
  21   3   1    0.06    0.81
  21   3  -1    1.15    0.77
  22   3   1    9.37    1.04
  22   3  -1    9.21    1.01
 -22  -3   1    8.41    1.00
 -22  -3  -1   10.13    1.03
 -23  -3   1    4.80    0.93
 -23  -3  -1    4.21    0.88
  23   3   1    5.40    0.99
  23   3  -1    3.07    0.88
 -24  -3   1    3.04    0.91
 -24  -3  -1    3.85    0.90
  24   3   1    3.41    0.98
  24   3  -1    5.18    0.99
  25   3   1   15.35    1.31
 -25  -3   1   12.33    1.24
 -25  -3  -1   13.10    1.21
 -26  -3   1    1.65    0.92
 -26  -3  -1    2.13    0.87
  26   3   1    1.25    1.03
 -27  -3   1    5.92    1.11
 -27  -3  -1    6.05    1.01
  27   3   1    5.71    1.18
  28   3   1   22.24    1.58
 -28  -3   1   22.95    1.58
 -28  -3  -1   22.58    1.52
 -29  -3   1    5.09    1.08
 -29  -3  -1    6.69    1.14
  29   3   1    6.98    1.25
   0  -3   2    0.07    0.52
   0   3   2    0.00    0.23
   0  -3  -2    0.08    0.20
   0  -3   2    0.16    0.33
   1  -3   2    0.16    0.50
  -1  -3   2    0.15    0.49
  -1   3   2    0.10    0.22
   1   3   2    0.14    0.23
   1  -3   2    0.34    0.34
  -1  -3  -2    0.11    0.22
  -1  -3   2    0.23    0.34
   2  -3   2    0.06    0.46
  -2  -3   2   -0.14    0.48
   2   3   2    0.07    0.24
   2  -3   2    0.15    0.33
  -2  -3   2   -0.05    0.35
  -2  -3  -2    0.31    0.24
  -3  -3   2    0.78    0.36
  -3  -3  -2    0.42    0.26
   3  -3   2    0.72    0.52
  -3  -3   2    0.69    0.51
  -3   3   2    1.31    0.65
   3   3   2    0.62    0.26
  -4  -3   2    0.60    0.37
  -4  -3  -2    0.72    0.29
  -4   3   2    0.79    0.66
   4  -3   2    0.56    0.45
  -4  -3   2    0.61    0.54
   4   3   2    0.84    0.30
   5  -3   2   15.81    0.80
  -5  -3   2   14.26    0.81
  -5   3   2   14.37    0.86
   5   3   2   15.89    0.58
  -5  -3   2   15.46    0.69
  -5  -3  -2   14.83    0.58
   6  -3   2   11.32    0.72
  -6  -3   2   10.30    0.76
  -6   3   2   11.26    0.84
  -6  -3  -2   10.71    0.54
   6   3   2   10.82    0.55
  -6  -3   2   11.52    0.64
   6  -3   2    9.66    0.52
  -7  -3   2    0.38    0.43
  -7  -3  -2    0.81    0.36
   7  -3   2    1.17    0.50
  -7   3   2    1.27    0.63
  -7  -3   2    0.47    0.55
   7  -3  -2    0.85    0.52
   7   3   2    0.31    0.38
   7  -3   2    0.65    0.48
  -8   3   2   23.48    1.05
   8  -3   2   23.29    0.92
  -8  -3   2   20.88    0.94
   8  -3  -2   21.94    0.88
   8   3   2   21.66    0.81
   8   3  -2   22.15    0.66
  -8  -3   2   23.24    0.89
  -8  -3  -2   22.41    0.83
  -9  -3   2    0.38    0.47
  -9  -3  -2    0.27    0.49
   9  -3   2    0.77    0.49
  -9  -3   2   -0.10    0.58
   9  -3  -2    0.93    0.50
   9   3   2    0.59    0.49
  -9   3   2    1.18    0.64
   9   3  -2    0.65    0.43
 -10   3   2   24.54    1.06
  10  -3   2   23.12    0.93
 -10  -3   2   21.77    0.97
  10  -3  -2   23.99    0.93
 -10   3  -2   23.33    0.93
  10   3   2   22.78    0.91
  10   3  -2   23.58    0.81
 -10  -3   2   21.65    0.94
 -10  -3  -2   22.07    0.95
 -11  -3   2    0.65    0.51
 -11  -3  -2    0.62    0.55
 -11   3  -2    1.11    0.55
 -11   3   2    0.16    0.61
  11  -3   2    0.85    0.49
 -11  -3   2    0.51    0.55
  11  -3  -2    0.27    0.50
  11   3   2    0.75    0.54
  11   3  -2    1.05    0.52
 -12  -3   2    0.52    0.54
 -12   3   2    0.01    0.61
 -12  -3  -2    0.17    0.54
  12  -3   2    0.37    0.44
 -12  -3   2   -0.10    0.56
  12  -3  -2    0.13    0.48
 -12   3  -2    0.79    0.53
  12   3   2    0.08    0.51
  12   3  -2    0.20    0.53
 -13   3  -2    2.91    0.55
 -13   3   2    2.58    0.55
 -13  -3   2    2.69    0.63
 -13  -3  -2    2.08    0.60
  13  -3   2    2.77    0.51
 -13  -3   2    2.10    0.53
  13  -3  -2    2.31    0.50
  13   3   2    2.79    0.58
  13   3  -2    2.63    0.58
 -14  -3   2   -0.22    0.59
 -14  -3  -2    0.00    0.59
  14  -3   2    0.32    0.45
 -14  -3   2   -0.11    0.50
  14  -3  -2    0.19    0.45
 -14   3  -2   -0.26    0.49
  14   3   2    0.06    0.56
  14   3  -2    0.26    0.56
 -14   3   2    0.21    0.51
 -15  -3   2    2.44    0.64
 -15  -3  -2    2.01    0.63
 -15   3  -2    3.38    0.53
  15  -3   2    2.60    0.51
  15  -3  -2    2.65    0.50
 -15   3   2    3.30    0.57
  15   3   2    3.53    0.65
  15   3  -2    2.73    0.63
 -16   3  -2    5.58    0.55
  16  -3   2    4.45    0.57
  16  -3  -2    5.03    0.59
  16   3  -2    5.17    0.71
 -16  -3   2    5.40    0.79
 -16  -3  -2    5.92    0.79
  16   3   2    4.21    0.70
 -16   3   2    4.85    0.63
  17  -3   2   29.70    1.08
  17  -3  -2   33.25    1.06
  17   3   2   31.06    1.33
  17   3  -2   28.95    1.17
 -17  -3   2   31.11    1.40
 -17  -3  -2   30.63    1.35
 -17   3   2   31.66    1.16
 -18  -3   2   -0.22    0.68
 -18  -3  -2    0.10    0.64
  18  -3   2    0.11    0.48
  18  -3  -2    0.26    0.45
 -18   3   2    0.27    0.54
  18   3   2   -0.09    0.73
  18   3  -2    0.38    0.66
 -19  -3   2    0.28    0.71
 -19  -3  -2    0.24    0.68
  19  -3   2    0.21    0.47
 -19   3   2    0.09    0.53
  19   3   2    0.03    0.78
  19   3  -2    0.81    0.68
 -20  -3   2    1.83    0.75
 -20  -3  -2    0.98    0.68
  20  -3   2    1.11    0.48
 -20   3   2    0.80    0.53
  20   3   2    1.77    0.83
  20   3  -2    1.42    0.73
 -21  -3   2   -0.04    0.78
 -21   3   2    0.43    0.55
 -21  -3  -2    0.56    0.71
  21  -3   2    0.36    0.46
  21   3   2    0.36    0.87
  22   3   2   12.12    1.14
 -22  -3   2   11.84    1.11
 -22  -3  -2   12.13    1.07
 -22   3   2   12.13    0.87
 -23   3   2    0.90    0.59
 -23  -3   2    1.17    0.84
 -23  -3  -2    0.31    0.74
  23   3   2    0.92    0.89
 -24  -3   2    0.42    0.88
 -24  -3  -2    1.24    0.81
  24   3   2    1.04    0.97
 -25  -3   2    4.56    0.99
 -25  -3  -2    4.86    0.94
  25   3   2    5.23    1.11
 -26  -3   2    0.11    0.90
 -26  -3  -2   -0.30    0.84
  26   3   2    0.22    1.04
  27   3   2   24.07    1.62
  27  -3   2   23.79    1.69
 -27  -3   2   22.67    1.57
 -27  -3  -2   26.08    1.54
 -28  -3   2    3.27    0.99
 -28  -3  -2    4.71    0.99
  28   3   2    4.94    1.17
  28  -3   2    5.84    1.32
 -29  -3   2    5.68    1.14
 -29  -3  -2    7.44    1.12
  29   3   2    6.13    1.23
  29  -3   2    7.44    1.37
  30   3   2    0.65    1.10
  30  -3   2    2.06    1.29
   0  -3   3   34.62    1.10
   0  -3  -3   33.53    0.52
   0   3   3   33.73    0.76
   0  -3   3   33.53    0.93
   1  -3   3   49.18    1.27
  -1  -3   3   48.08    1.26
  -1   3   3   48.77    1.44
  -1   3   3   45.95    0.87
   1   3   3   49.50    0.91
   1  -3   3   47.24    1.07
  -1  -3   3   49.59    1.11
  -2   3   3    0.87    0.68
   2  -3   3    0.11    0.49
  -2  -3   3    0.47    0.50
  -2   3   3    0.00    0.28
   2   3   3    0.08    0.32
   2  -3   3    0.05    0.38
  -2  -3   3    0.13    0.41
  -2  -3  -3    0.18    0.21
   3  -3   3   20.72    0.88
  -3  -3   3   21.44    0.91
  -3   3   3   22.22    1.06
   3  -3   3   21.98    0.77
   3   3   3   21.24    0.66
  -3  -3   3   20.28    0.78
  -3  -3  -3   20.42    0.52
   4  -3   3   16.80    0.83
  -4  -3   3   17.13    0.86
  -4   3   3   17.26    1.00
   4   3   3   17.02    0.63
  -4  -3   3   16.67    0.74
  -4  -3  -3   15.15    0.50
   5  -3   3  102.70    1.76
  -5  -3   3  101.19    1.77
  -5   3   3  102.18    1.94
   5   3   3  103.12    1.44
  -5  -3   3  101.57    1.61
  -5  -3  -3  101.05    1.24
   6  -3   3  193.76    2.37
  -6   3   3  196.70    2.62
  -6  -3   3  189.16    2.37
   6   3   3  191.31    2.01
  -6  -3   3  198.16    2.25
  -6  -3  -3  196.33    1.83
  -7  -3   3    0.62    0.44
  -7  -3  -3    0.30    0.37
   7  -3   3    0.63    0.45
  -7  -3   3    0.37    0.54
   7   3   3    0.29    0.43
  -7   3   3    0.86    0.61
  -8  -3   3    1.22    0.47
  -8  -3  -3    1.12    0.44
   8  -3   3    0.92    0.52
  -8  -3   3    0.56    0.55
  -8   3   3    1.15    0.64
   8   3   3    0.56    0.49
  -9   3   3   11.83    0.88
   9  -3   3   10.62    0.74
  -9  -3   3   10.32    0.76
   9   3   3   10.37    0.70
   9  -3   3    9.81    0.72
  -9  -3   3   11.25    0.73
  -9  -3  -3   11.18    0.70
  10  -3   3    4.69    0.61
 -10  -3   3    4.45    0.59
  10  -3  -3    5.75    0.61
 -10   3   3    4.86    0.75
 -10  -3   3    4.98    0.61
 -10  -3  -3    5.24    0.60
  10   3   3    3.99    0.60
  10  -3   3    4.35    0.67
 -11   3   3   12.84    0.86
  11  -3   3   12.63    0.78
 -11  -3   3   13.04    0.77
  11  -3  -3   12.63    0.74
 -11   3  -3   13.91    0.76
  11   3   3   12.50    0.81
  11  -3   3   13.79    0.92
 -11  -3   3   13.15    0.83
 -11  -3  -3   14.19    0.83
 -12   3   3   11.55    0.79
  12  -3   3   11.00    0.75
 -12  -3   3   10.08    0.69
  12  -3  -3   10.96    0.70
 -12   3  -3   10.77    0.69
  12   3   3   10.39    0.78
  12  -3   3   12.18    0.92
 -12  -3   3   10.94    0.79
 -12  -3  -3    9.66    0.76
 -13   3   3   21.55    0.99
  13  -3   3   20.70    0.93
 -13  -3   3   19.16    0.83
 -13   3  -3   21.88    0.86
  13  -3  -3   18.88    0.84
  13   3   3   20.88    1.01
  13  -3   3   20.11    1.12
 -13  -3   3   21.38    1.05
 -13  -3  -3   20.28    1.01
 -14  -3   3    0.05    0.55
 -14  -3  -3    0.26    0.58
  14  -3   3    0.38    0.48
  14  -3  -3    0.35    0.46
 -14   3   3    0.16    0.52
  14   3   3    0.10    0.54
 -14   3  -3    0.44    0.44
  14  -3   3    1.69    0.79
  15  -3   3    4.05    0.56
 -15  -3   3    4.12    0.72
 -15  -3  -3    4.63    0.70
  15  -3  -3    3.34    0.53
  15   3   3    4.02    0.69
 -15   3   3    4.46    0.65
  15  -3   3    5.63    0.92
  16  -3   3   53.17    1.43
  16  -3  -3   52.85    1.31
  16   3   3   56.89    1.65
  16  -3   3   56.40    1.84
 -16  -3   3   52.11    1.70
 -16  -3  -3   55.14    1.66
 -16   3   3   51.72    1.48
  17  -3   3   35.32    1.20
  17  -3  -3   33.76    1.08
  17  -3   3   32.34    1.52
  17   3   3   35.42    1.41
 -17  -3   3   33.70    1.48
 -17  -3  -3   34.15    1.39
 -17   3   3   35.25    1.26
  18  -3   3   30.27    1.13
  18  -3  -3   31.49    1.04
  18   3   3   30.80    1.36
  18  -3   3   31.82    1.57
 -18  -3   3   30.23    1.46
 -18  -3  -3   29.18    1.33
 -18   3   3   28.46    1.17
 -19  -3   3    0.75    0.73
 -19  -3  -3    1.52    0.67
  19  -3   3    0.87    0.50
 -19   3   3    0.70    0.55
  19   3   3    1.18    0.72
  19  -3   3    1.51    0.92
  20  -3   3    6.11    0.65
 -20  -3   3    5.86    0.91
  20   3   3    6.70    0.89
 -20  -3  -3    6.31    0.83
 -20   3   3    6.59    0.74
  20  -3   3    5.12    1.04
 -21  -3   3    0.40    0.78
 -21   3   3    1.15    0.59
 -21  -3  -3    1.07    0.69
  21  -3   3    0.80    0.50
  21   3   3    1.07    0.76
  21  -3   3    1.29    1.00
  22  -3   3   28.40    1.17
  22   3   3   26.94    1.46
  22  -3   3   26.20    1.60
 -22  -3   3   24.58    1.46
 -22  -3  -3   25.39    1.36
 -22   3   3   25.39    1.19
  23   3   3   23.22    1.43
  23  -3   3   24.96    1.62
 -23  -3   3   19.95    1.40
 -23  -3  -3   21.43    1.29
 -23   3   3   26.45    1.23
 -24   3   3    1.93    0.65
 -24  -3   3    1.55    0.88
 -24  -3  -3    3.34    0.83
  24   3   3    1.93    0.95
  24  -3   3    2.54    1.14
 -25  -3   3   -0.44    0.90
 -25  -3  -3    0.62    0.83
  25   3   3   -0.10    1.01
  25  -3   3    2.11    1.18
  26   3   3   -0.11    1.02
 -26  -3   3   -0.15    0.91
 -26  -3  -3    0.00    0.79
  26  -3   3    1.68    1.20
 -27  -3   3    3.52    1.01
 -27  -3  -3    3.07    0.93
  27   3   3    3.77    1.11
  27  -3   3    3.50    1.28
  28   3   3   23.25    1.64
  28  -3   3   21.83    1.76
 -28  -3   3   23.75    1.66
 -28  -3  -3   24.45    1.52
 -29  -3  -3    2.25    0.95
  29   3   3    1.17    1.07
  29  -3   3    2.79    1.38
  30   3   3    5.70    1.23
   0  -3   4    0.07    0.49
   0   3   4    0.99    0.70
   0   3   4   -0.21    0.35
   0  -3   4   -0.01    0.39
   1  -3   4    6.70    0.62
  -1  -3   4    6.59    0.65
  -1   3   4    6.82    0.83
   1   3   4    7.04    0.82
  -1   3   4    6.76    0.47
   1   3   4    6.79    0.48
   1  -3   4    6.68    0.55
  -1  -3   4    6.35    0.54
   2  -3   4    0.88    0.47
  -2  -3   4    0.74    0.49
   2   3   4    1.38    0.74
  -2   3   4    1.14    0.65
  -2   3   4    0.73    0.34
   2   3   4    0.39    0.35
   2  -3   4    0.79    0.40
  -2  -3   4    0.64    0.41
   3  -3   4   22.46    0.93
  -3  -3   4   23.10    0.96
  -3   3   4   22.05    1.10
   3  -3   4   22.85    0.83
  -3   3   4   20.77    0.69
   3   3   4   21.49    0.74
  -3  -3   4   22.32    0.85
  -4  -3   4    2.62    0.49
  -4   3   4    2.45    0.75
   4  -3   4    2.84    0.53
  -4  -3   4    3.49    0.56
   4   3   4    4.01    0.47
  -4  -3  -4    2.82    0.28
  -5   3   4   32.48    1.26
   5  -3   4   32.20    1.11
  -5  -3   4   30.74    1.06
   5   3   4   29.37    0.90
  -5  -3   4   32.63    1.02
  -5  -3  -4   31.62    0.69
  -6  -3   4    0.75    0.44
  -6  -3  -4    0.83    0.32
   6  -3   4    0.50    0.53
  -6  -3   4    0.35    0.53
  -6   3   4   -0.42    0.67
   6   3   4    0.40    0.41
  -7   3   4    7.71    0.79
   7  -3   4    7.34    0.65
  -7  -3   4    7.75    0.68
   7   3   4    7.20    0.62
  -7  -3   4    8.05    0.64
  -7  -3  -4    7.05    0.49
  -8  -3   4    0.61    0.47
  -8  -3  -4    0.98    0.42
  -8   3   4    0.04    0.66
   8  -3   4    0.69    0.56
  -8  -3   4    0.72    0.52
   8   3   4    0.68    0.47
  -9  -3   4    0.65    0.50
  -9   3   4    0.93    0.66
  -9  -3  -4    0.81    0.46
   9  -3   4    0.58    0.51
  -9  -3   4    1.00    0.51
   9   3   4    0.38    0.51
 -10  -3   4    0.15    0.48
 -10   3   4    0.32    0.59
 -10  -3  -4   -0.06    0.47
  10  -3   4    0.42    0.49
 -10  -3   4    0.06    0.45
  10   3   4   -0.28    0.54
 -11   3   4    3.80    0.66
 -11  -3   4    3.72    0.56
 -11  -3   4    3.98    0.52
 -11  -3  -4    3.20    0.56
  11  -3   4    3.44    0.57
  11   3   4    2.71    0.57
 -12  -3   4    1.81    0.53
 -12   3  -4    2.12    0.51
 -12  -3  -4    1.57    0.50
  12  -3   4    1.65    0.51
 -12  -3   4    1.63    0.47
  12  -3  -4    1.76    0.51
  12   3   4    1.37    0.55
 -12   3   4    1.99    0.59
  13  -3   4   24.34    1.03
 -13   3  -4   26.49    0.90
  13  -3  -4   24.87    0.95
  13   3   4   23.67    1.09
  13  -3   4   24.62    1.16
 -13  -3   4   24.39    1.11
 -13  -3  -4   23.58    1.05
 -13   3   4   25.56    1.10
  14  -3   4    5.40    0.62
  14  -3  -4    5.94    0.60
  14   3   4    5.80    0.72
 -14  -3   4    5.49    0.72
 -14  -3  -4    6.25    0.72
  14  -3   4    6.02    0.87
 -14   3   4    6.48    0.70
  15  -3   4    8.95    0.71
  15  -3  -4    9.75    0.68
  15   3   4    9.28    0.85
  15  -3   4    9.77    0.99
 -15  -3   4    8.35    0.82
 -15  -3  -4   11.28    0.87
 -15   3   4    9.45    0.79
  16  -3   4   22.14    1.02
  16  -3  -4   20.84    0.89
  16   3   4   20.90    1.14
  16  -3   4   20.43    1.29
 -16  -3   4   21.27    1.18
 -16  -3  -4   21.06    1.12
 -16   3   4   22.32    1.07
 -17  -3   4    1.65    0.65
 -17  -3  -4    2.25    0.65
  17  -3   4    1.77    0.54
 -17   3   4    1.84    0.60
  17  -3  -4    1.57    0.51
  17   3   4    1.31    0.67
  17  -3   4    1.62    0.91
 -18  -3   4    1.27    0.69
  18  -3   4    0.99    0.53
 -18  -3  -4    2.01    0.67
 -18   3   4    1.72    0.63
  18   3   4    1.08    0.69
  18  -3   4    1.77    1.01
 -19  -3   4    1.91    0.71
  19  -3   4    2.20    0.57
 -19   3   4    2.01    0.64
 -19  -3  -4    1.93    0.64
  19   3   4    2.61    0.76
  19  -3   4    2.46    0.96
 -20  -3   4    1.15    0.71
 -20   3   4    0.70    0.62
  20  -3   4    1.38    0.54
 -20  -3  -4    1.31    0.63
  20   3   4    2.15    0.77
  20  -3   4    1.34    0.99
 -21  -3   4    3.06    0.82
 -21   3   4    2.91    0.68
  21  -3   4    2.25    0.60
 -21  -3  -4    3.59    0.73
  21   3   4    3.21    0.85
  21  -3   4    3.29    1.09
 -22   3   4    0.10    0.62
 -22  -3   4    1.57    0.84
  22  -3   4   -0.37    0.56
 -22  -3  -4    0.05    0.70
  22   3   4    0.65    0.82
  22  -3   4    0.72    1.09
 -23   3   4    0.98    0.63
 -23  -3   4    1.52    0.83
 -23  -3  -4    1.36    0.74
  23   3   4    1.64    0.86
 -24   3   4    0.44    0.66
 -24  -3   4    0.12    0.93
 -24  -3  -4    0.50    0.75
  24   3   4    0.55    0.92
  24  -3   4    1.02    1.22
  25   3   4   14.02    1.31
 -25  -3   4   11.29    1.23
 -25  -3  -4   14.48    1.19
 -25   3   4   13.80    1.05
 -26  -3   4    0.79    0.91
 -26  -3  -4    0.82    0.84
  26   3   4    0.43    0.94
 -26   3   4   -0.08    0.73
  27   3   4   14.91    1.38
 -27  -3   4   10.31    1.29
 -27  -3  -4   13.47    1.22
 -28  -3  -4    4.40    0.98
  28   3   4    3.73    1.09
 -29  -3  -4    1.29    0.89
  29   3   4    1.65    1.06
   0  -3   5   41.31    1.27
   0   3   5   41.96    1.46
   0   3   5   40.72    1.01
   0  -3   5   42.54    1.15
   1  -3   5    9.10    0.72
  -1  -3   5    9.59    0.73
  -1   3   5    9.22    0.88
   1   3   5    8.07    0.90
  -1   3   5    8.21    0.56
   1  -3   5    8.66    0.62
   1   3   5    7.80    0.55
  -1  -3   5    8.90    0.66
   2  -3   5    4.97    0.64
  -2  -3   5    5.37    0.66
   2   3   5    5.78    0.81
  -2   3   5    4.52    0.48
   2  -3   5    4.89    0.54
   2   3   5    4.71    0.50
  -2  -3   5    4.94    0.58
  -2   3   5    4.46    0.82
   3   3   5    0.89    0.73
   3  -3   5    0.15    0.56
  -3  -3   5    0.52    0.54
  -3   3   5    0.26    0.40
   3   3   5    0.39    0.40
  -3   3   5    0.33    0.73
  -3  -3   5    0.24    0.48
  -4   3   5    8.84    0.88
   4  -3   5    9.54    0.78
  -4  -3   5    8.93    0.73
   4   3   5    8.61    0.91
  -4   3   5    9.66    0.58
   4   3   5   10.11    0.64
  -4  -3   5    9.08    0.65
  -5   3   5    7.54    0.84
   5  -3   5    8.74    0.75
  -5  -3   5    7.10    0.68
   5   3   5    8.39    0.91
   5   3   5    9.30    0.65
  -5  -3   5    7.51    0.64
  -6  -3   5    1.24    0.46
   6   3   5    1.53    0.76
  -6   3   5    0.66    0.70
   6  -3   5    1.12    0.56
  -6  -3   5    1.08    0.53
   6   3   5    0.80    0.46
  -7  -3   5    0.30    0.46
  -7   3   5    0.09    0.64
   7  -3   5    0.18    0.51
  -7  -3   5   -0.20    0.51
   7   3   5    0.25    0.45
  -8  -3   5    0.39    0.48
  -8   3   5    0.88    0.62
   8  -3   5    0.42    0.47
  -8  -3   5    0.43    0.46
   8   3   5    0.58    0.48
  -9   3   5    3.08    0.61
  -9  -3   5    1.99    0.50
   9  -3   5    2.88    0.59
  -9  -3   5    2.15    0.51
   9   3   5    2.27    0.52
 -10  -3   5    3.45    0.54
  10  -3   5    3.67    0.57
 -10  -3   5    3.22    0.53
  10   3   5    3.31    0.59
 -10   3   5    4.59    0.69
 -11   3   5   22.09    1.07
  11  -3   5   20.56    0.99
 -11  -3   5   20.47    0.86
  11   3   5   20.52    1.00
 -11  -3   5   21.36    1.00
 -11  -3  -5   24.23    0.96
 -12  -3   5    1.04    0.54
 -12  -3  -5    1.74    0.55
  12  -3   5    1.32    0.48
 -12  -3   5    1.23    0.43
 -12   3   5    1.57    0.57
  12   3   5    1.32    0.59
 -13  -3   5    0.21    0.54
 -13  -3  -5    0.45    0.54
  13  -3   5    0.46    0.52
 -13   3   5    0.37    0.61
  13   3   5    0.14    0.60
  14  -3   5   10.64    0.80
  14  -3  -5   10.96    0.72
  14   3   5    9.74    0.85
 -14  -3   5    8.73    0.82
 -14  -3  -5   10.63    0.82
 -14   3   5    9.65    0.81
 -15  -3   5    0.16    0.60
  15  -3   5    0.37    0.50
 -15  -3  -5    0.49    0.59
 -15   3   5    0.01    0.60
  15  -3  -5    0.30    0.49
  15   3   5    0.35    0.63
 -16  -3   5    1.46    0.63
  16  -3   5    2.51    0.57
 -16  -3  -5    2.59    0.67
 -16   3   5    1.49    0.63
  16  -3  -5    2.85    0.54
  16   3   5    2.54    0.70
 -17  -3   5    2.73    0.72
  17  -3   5    3.43    0.59
 -17  -3  -5    2.76    0.65
 -17   3   5    3.55    0.67
  17   3   5    3.96    0.79
  18  -3   5    8.88    0.78
  18   3   5    9.22    0.93
 -18  -3   5    8.50    0.93
 -18  -3  -5   10.71    0.92
 -18   3   5    8.48    0.85
 -19  -3   5    0.79    0.69
 -19   3   5   -0.08    0.60
  19  -3   5    0.18    0.55
 -19  -3  -5    0.03    0.67
  19   3   5   -0.06    0.72
 -20  -3   5    0.02    0.75
 -20   3   5    0.32    0.62
  20  -3   5   -0.03    0.56
 -20  -3  -5    0.14    0.66
  20   3   5    0.89    0.76
 -21  -3   5   -0.01    0.81
 -21   3   5    0.81    0.64
  21  -3   5    0.54    0.58
 -21  -3  -5    0.86    0.72
  21   3   5    0.66    0.80
 -22   3   5    1.20    0.66
 -22  -3   5    1.08    0.85
  22  -3   5    1.07    0.62
 -22  -3  -5    0.93    0.73
  22   3   5    0.86    0.83
  23  -3   5    9.37    0.90
  23   3   5   10.66    1.16
 -23  -3   5    8.13    1.08
 -23  -3  -5   10.54    1.07
 -23   3   5   10.12    0.97
 -24   3   5    2.23    0.74
 -24  -3   5    2.30    0.95
 -24  -3  -5    3.71    0.86
  24   3   5    2.13    0.95
 -25  -3   5    1.42    0.91
 -25  -3  -5    1.74    0.85
  25   3   5    0.45    0.97
 -25   3   5    2.70    0.80
 -26  -3   5    2.74    0.98
 -26  -3  -5    3.30    0.86
  26   3   5    4.02    1.07
 -26   3   5    2.47    0.82
 -27  -3   5    0.62    0.98
 -27  -3  -5    0.34    0.83
 -27   3   5   -0.10    0.79
  27   3   5    0.37    1.00
 -28  -3  -5    1.95    0.89
  28   3   5    1.98    1.09
 -29  -3  -5    0.78    0.92
   0  -3   6    0.37    0.52
   0   3   6    0.15    0.42
   0   3   6    0.00    0.69
   0  -3   6    0.22    0.47
  -1   3   6    6.41    0.85
   1  -3   6    5.69    0.68
  -1  -3   6    6.02    0.67
  -1   3   6    5.63    0.54
   1  -3   6    6.44    0.63
   1   3   6    6.30    0.57
  -1  -3   6    6.02    0.59
   1   3   6    4.68    0.77
   2   3   6    1.58    0.73
   2  -3   6    1.54    0.54
  -2  -3   6    1.35    0.56
  -2   3   6    0.98    0.75
  -2   3   6    0.95    0.42
   2   3   6    1.05    0.45
   2  -3   6    1.48    0.49
  -2  -3   6    1.01    0.48
   3   3   6    0.03    0.74
   3  -3   6    0.34    0.58
  -3  -3   6   -0.24    0.55
  -3   3   6    0.31    0.73
  -3   3   6    0.44    0.40
   3   3   6    0.29    0.43
  -3  -3   6    0.18    0.46
  -4   3   6    1.54    0.68
   4  -3   6    2.52    0.60
  -4  -3   6    2.20    0.57
   4   3   6    2.20    0.77
  -4   3   6    2.49    0.44
   4   3   6    2.28    0.48
  -4  -3   6    2.11    0.48
  -5   3   6    0.73    0.60
   5  -3   6    0.14    0.49
  -5  -3   6    0.61    0.52
   5   3   6    0.93    0.75
  -5   3   6    0.83    0.41
   5   3   6    0.58    0.46
  -5  -3   6    0.25    0.44
  -6   3   6    6.88    0.77
   6  -3   6    7.04    0.68
  -6  -3   6    6.34    0.64
   6   3   6    6.25    0.85
   6   3   6    6.25    0.63
  -6  -3   6    7.45    0.66
  -7   3   6    1.45    0.65
  -7  -3   6    0.69    0.49
   7   3   6    0.46    0.69
   7  -3   6    1.25    0.47
  -7  -3   6    0.88    0.49
   7   3   6    0.63    0.48
  -8   3   6   19.29    1.03
   8  -3   6   18.11    0.95
  -8  -3   6   17.77    0.87
   8   3   6   19.51    1.11
   8   3   6   17.23    0.90
  -8  -3   6   17.18    0.87
  -9  -3   6    0.89    0.44
   9  -3   6    0.94    0.53
  -9  -3   6    0.74    0.46
   9   3   6    0.78    0.72
   9   3   6    0.01    0.52
  -9   3   6    0.25    0.58
  10  -3   6   31.24    1.21
 -10  -3   6   28.91    1.03
  10   3   6   30.23    1.33
  10   3   6   30.20    1.18
 -10  -3   6   29.51    1.13
 -10   3   6   28.37    1.24
  11  -3   6   19.22    0.99
 -11  -3   6   18.35    0.84
  11   3   6   16.26    1.08
  11   3   6   18.64    1.00
 -11  -3   6   17.87    0.93
 -11   3   6   18.05    1.03
  12  -3   6    6.19    0.71
  12   3   6    6.38    0.76
 -12  -3   6    6.10    0.66
  12   3   6    4.78    0.81
 -12   3   6    6.06    0.75
 -13  -3   6    1.32    0.55
  13   3   6    1.92    0.75
  13  -3   6    1.10    0.54
 -13   3   6    1.22    0.65
  13   3   6    1.08    0.62
  14  -3   6   15.45    0.97
  14   3   6   16.59    1.04
 -14  -3   6   15.69    0.98
 -14   3   6   18.52    1.06
 -15  -3   6    2.20    0.65
  15  -3   6    1.94    0.57
 -15   3   6    3.85    0.72
  15   3   6    2.64    0.70
  16  -3   6    7.86    0.80
  16   3   6    7.24    0.87
 -16  -3   6    7.75    0.85
 -16   3   6    6.17    0.81
 -17  -3   6    4.85    0.80
  17  -3   6    4.55    0.70
 -17   3   6    4.65    0.74
  17   3   6    4.93    0.79
 -18  -3   6    1.03    0.66
 -18   3   6    1.62    0.70
  18  -3   6    0.87    0.56
  18   3   6    1.03    0.72
  19  -3   6    8.55    0.84
  19   3   6    9.07    0.98
 -19  -3   6    9.58    0.97
 -19   3   6    8.23    0.87
 -20  -3   6    0.30    0.72
 -20   3   6    0.57    0.68
  20  -3   6    0.25    0.60
  20   3   6    0.54    0.79
  21  -3   6   13.88    1.02
  21   3   6   12.59    1.15
 -21   3   6   15.23    1.09
 -22   3   6    5.63    0.84
 -22  -3   6    4.16    0.91
  22  -3   6    4.36    0.77
  22   3   6    3.73    0.93
 -23   3   6    3.44    0.83
 -23  -3   6    2.65    0.94
  23  -3   6    2.68    0.73
  23   3   6    2.57    0.96
 -24  -3   6    7.34    1.10
  24   3   6    9.60    1.21
 -24   3   6    8.95    0.97
 -25  -3   6    0.06    0.97
  25   3   6    0.07    0.98
 -25   3   6    0.41    0.80
 -26  -3   6    1.82    0.89
  26   3   6    2.08    1.02
 -26   3   6    1.84    0.83
 -27   3   6    1.36    0.82
  27   3   6    1.22    1.05
 -28   3   6    1.60    0.87
   0   3   7  217.92    3.12
   0  -3   7  216.39    2.90
   0   3   7  210.12    2.48
   0  -3   7  221.80    2.67
  -1   3   7   30.95    1.33
   1   3   7   28.24    1.30
   1  -3   7   28.29    1.17
  -1  -3   7   28.79    1.16
   1  -3   7   29.51    1.07
   1   3   7   29.39    1.03
  -1  -3   7   30.15    1.09
  -1   3   7   29.90    1.02
   2  -3   7    4.65    0.66
  -2  -3   7    4.42    0.61
  -2   3   7    4.45    0.71
   2   3   7    4.27    0.76
   2  -3   7    5.61    0.62
  -2   3   7    4.41    0.53
   2   3   7    4.19    0.56
  -2  -3   7    4.00    0.56
  -3   3   7    0.16    0.60
   3  -3   7    0.27    0.50
  -3  -3   7    0.16    0.48
   3   3   7   -0.25    0.71
  -3   3   7    0.30    0.43
   3   3   7    0.14    0.45
  -3  -3   7    0.35    0.46
  -4   3   7    2.48    0.62
   4  -3   7    2.56    0.59
  -4  -3   7    2.44    0.58
  -4   3   7    2.01    0.47
   4   3   7    1.67    0.71
   4   3   7    2.48    0.52
  -4  -3   7    2.36    0.54
   5  -3   7    0.61    0.55
  -5  -3   7    0.31    0.50
  -5   3   7    0.97    0.45
   5   3   7    0.24    0.49
   5   3   7    1.78    0.72
  -5   3   7    0.58    0.58
  -5  -3   7    0.69    0.50
   6  -3   7    0.93    0.51
  -6  -3   7    0.68    0.51
  -6   3   7    0.56    0.41
   6   3   7    0.75    0.49
  -6   3   7    0.76    0.58
   6   3   7    0.70    0.67
  -6  -3   7    0.52    0.50
   7   3   7    0.36    0.72
   7  -3   7    0.36    0.51
  -7  -3   7    0.19    0.51
   7   3   7   -0.06    0.52
  -7   3   7    0.59    0.57
  -7  -3   7    0.05    0.50
   8  -3   7    6.25    0.71
  -8  -3   7    4.54    0.61
   8   3   7    5.41    0.85
  -8  -3   7    4.85    0.61
   8   3   7    3.93    0.62
  -8   3   7    5.71    0.75
  -9  -3   7    3.70    0.58
   9   3   7    4.68    0.84
   9  -3   7    4.52    0.66
  -9  -3   7    2.87    0.55
  -9   3   7    3.99    0.72
   9   3   7    3.35    0.63
  10  -3   7   44.43    1.48
 -10  -3   7   39.50    1.23
  10   3   7   43.78    1.56
  10   3   7   40.94    1.41
 -10  -3   7   42.39    1.35
 -10   3   7   41.90    1.51
  11  -3   7   24.70    1.16
  11   3   7   22.51    1.22
  11   3   7   21.92    1.12
 -11  -3   7   23.58    1.09
 -11   3   7   22.63    1.19
  12  -3   7  105.93    2.24
 -12  -3   7  103.68    2.12
 -12   3   7  105.21    2.29
  13  -3   7   12.95    0.96
  13   3   7   10.33    0.89
 -13  -3   7   11.70    0.89
 -13   3   7   11.94    0.97
 -14  -3   7    0.57    0.57
  14  -3   7    0.81    0.57
 -14   3   7    0.25    0.62
  14   3   7    0.06    0.66
 -15  -3   7    1.04    0.59
  15  -3   7    1.20    0.62
 -15   3   7    0.98    0.62
  15   3   7    1.34    0.69
 -16  -3   7    0.46    0.62
  16  -3   7   -0.22    0.59
 -16   3   7    0.13    0.69
  16   3   7    0.58    0.68
 -17  -3   7    1.02    0.65
 -17   3   7   -0.04    0.73
  17  -3   7    0.21    0.65
  17   3   7    0.16    0.72
 -18  -3   7    0.57    0.72
 -18   3   7    0.10    0.71
  18  -3   7    0.69    0.65
  18   3   7    0.27    0.77
 -19  -3   7    0.95    0.75
 -19   3   7    1.30    0.68
  19  -3   7    0.94    0.66
  19   3   7    0.38    0.79
 -20  -3   7    0.16    0.79
 -20   3   7    0.56    0.69
  20  -3   7    0.01    0.70
  20   3   7    0.15    0.84
 -21   3   7    1.49    0.77
 -21  -3   7    1.06    0.86
  21  -3   7    1.62    0.75
  21   3   7    1.14    0.87
  22  -3   7   31.47    1.49
  22   3   7   31.85    1.66
 -22  -3   7   30.91    1.67
 -22   3   7   31.01    1.53
  23  -3   7   16.28    1.18
  23   3   7   17.39    1.38
 -23  -3   7   16.96    1.36
 -23   3   7   14.89    1.18
  24  -3   7   21.74    1.31
  24   3   7   20.42    1.50
 -24  -3   7   20.08    1.48
 -24   3   7   21.84    1.39
 -25  -3   7    0.28    0.91
  25   3   7   -0.41    0.99
 -25   3   7   -0.29    0.88
  26   3   7    0.56    1.03
 -26   3   7   -0.20    0.85
   0   3   8   -0.09    0.70
   0  -3   8    0.07    0.58
   0   3   8    0.02    0.50
   0  -3   8   -0.05    0.51
  -1   3   8   21.03    1.15
   1   3   8   21.83    1.17
   1  -3   8   20.01    1.09
  -1  -3   8   20.29    1.09
  -1   3   8   20.89    0.94
   1  -3   8   20.22    0.95
   1   3   8   21.52    0.97
  -1  -3   8   21.06    0.98
   2   3   8    2.06    0.70
   2  -3   8    3.14    0.63
  -2  -3   8    2.10    0.62
  -2   3   8    2.66    0.52
   2   3   8    2.23    0.55
  -2  -3   8    2.40    0.53
  -2   3   8    2.91    0.74
  -3   3   8   13.18    1.01
   3   3   8    9.98    0.94
   3  -3   8   11.82    0.90
  -3  -3   8   10.63    0.84
  -3   3   8   11.88    0.77
   3   3   8   11.82    0.80
  -3  -3   8   11.54    0.78
   4   3   8   13.28    1.03
   4  -3   8   13.33    0.96
  -4  -3   8   14.57    0.94
  -4   3   8   14.46    0.81
   4   3   8   14.38    0.87
  -4  -3   8   13.84    0.83
  -4   3   8   13.01    0.98
   5   3   8    1.86    0.74
  -5  -3   8    2.56    0.60
   5  -3   8    2.80    0.61
  -5   3   8    2.52    0.52
  -5   3   8    2.48    0.69
   5   3   8    2.45    0.57
  -5  -3   8    3.29    0.55
  -6  -3   8    5.71    0.69
   6  -3   8    4.56    0.73
   6   3   8    4.51    0.81
  -6   3   8    4.61    0.60
   6   3   8    5.01    0.66
  -6  -3   8    6.03    0.65
  -6   3   8    5.62    0.82
  -7  -3   8    0.16    0.54
   7  -3   8   -0.08    0.61
   7   3   8    0.31    0.72
  -7   3   8    0.55    0.70
   7   3   8    0.45    0.54
  -7  -3   8   -0.01    0.52
  -8  -3   8    0.06    0.53
   8  -3   8    0.07    0.55
   8   3   8    0.08    0.70
  -8   3   8    0.28    0.68
   8   3   8    0.41    0.56
  -8  -3   8    0.33    0.48
  -9  -3   8    0.77    0.54
  -9  -3   8    0.57    0.57
   9  -3   8    0.46    0.56
   9   3   8    0.77    0.72
  -9   3   8    0.99    0.63
   9   3   8    1.41    0.59
 -10  -3   8   -0.02    0.52
  10  -3   8    0.72    0.57
 -10   3   8    0.24    0.64
  10   3   8    0.35    0.69
  10   3   8    0.67    0.59
  11  -3   8   19.96    1.14
  11   3   8   18.51    1.09
 -11  -3   8   17.87    0.99
 -11   3   8   20.90    1.19
 -12  -3   8    3.88    0.63
  12  -3   8    3.42    0.69
 -12   3   8    3.32    0.74
  12   3   8    3.76    0.71
 -13  -3   8    0.58    0.54
  13  -3   8   -0.04    0.61
 -13   3   8    0.29    0.68
  13   3   8   -0.20    0.64
 -14  -3   8    2.11    0.61
  14  -3   8    3.03    0.72
 -14   3   8    3.55    0.76
  14   3   8    2.44    0.72
 -15  -3   8    1.27    0.61
 -15   3   8    0.87    0.71
  15  -3   8    1.16    0.68
  15   3   8    1.14    0.67
  16  -3   8    8.04    0.89
  16   3   8    8.20    0.90
 -16  -3   8    8.66    0.88
 -16   3   8    7.14    0.90
  17  -3   8    6.84    0.90
 -17   3   8    5.78    0.87
 -17  -3   8    6.59    0.86
  17   3   8    6.73    0.94
 -18  -3   8    3.29    0.77
 -18   3   8    3.16    0.79
  18  -3   8    3.11    0.75
  18   3   8    3.07    0.84
  19  -3   8   26.78    1.43
  19   3   8   24.00    1.42
 -19  -3   8   25.68    1.41
 -19   3   8   26.60    1.42
 -20   3   8    0.35    0.77
 -20  -3   8    0.41    0.77
  20  -3   8    1.25    0.74
  20   3   8    0.07    0.90
  21  -3   8   35.44    1.60
  21   3   8   31.45    1.65
 -21  -3   8   33.27    1.66
 -21   3   8   35.16    1.64
 -22  -3   8    3.77    0.91
  22  -3   8    3.80    0.85
  22   3   8    4.44    1.01
 -22   3   8    3.59    0.85
 -23  -3   8    1.49    0.97
  23  -3   8    1.30    0.77
  23   3   8    0.69    0.91
 -23   3   8    1.04    0.81
  24  -3   8    0.92    0.75
  24   3   8   -0.03    0.99
 -24   3   8    0.56    0.87
   0  -3   9   41.71    1.56
   0   3   9   43.04    1.36
   0   3   9   44.98    1.64
  -1  -3   9    0.60    0.63
   1  -3   9    0.51    0.65
  -1   3   9    0.39    0.49
   1   3   9    0.40    0.53
  -1   3   9    0.70    0.69
   1   3   9    0.30    0.69
  -1  -3   9    0.35    0.52
  -2  -3   9    0.08    0.63
   2  -3   9    0.10    0.64
  -2   3   9    0.55    0.70
  -2   3   9    0.30    0.51
   2   3   9   -0.32    0.52
   2   3   9    0.16    0.71
  -2  -3   9    0.11    0.52
  -3  -3   9    0.22    0.63
   3  -3   9    1.05    0.64
  -3   3   9    0.72    0.73
  -3   3   9    0.70    0.49
   3   3   9    0.20    0.53
  -3  -3   9    0.57    0.53
   3   3   9    0.27    0.69
  -4  -3   9    0.01    0.60
   4  -3   9    0.80    0.61
  -4   3   9    0.27    0.67
  -4   3   9    0.26    0.49
   4   3   9    0.82    0.54
  -4  -3   9    0.17    0.53
   4   3   9   -0.28    0.70
   5   3   9    0.64    0.66
  -5  -3   9    0.96    0.61
   5  -3   9    1.09    0.68
  -5   3   9    1.24    0.72
  -5   3   9    0.22    0.53
   5   3   9    1.07    0.53
  -5  -3   9    1.05    0.53
   6   3   9    0.77    0.69
  -6  -3   9    1.03    0.61
   6  -3   9    2.33    0.66
  -6   3   9    1.89    0.54
  -6   3   9    1.96    0.70
   6   3   9    1.61    0.58
  -6  -3   9    2.11    0.55
   7   3   9    4.90    0.80
  -7  -3   9    3.80    0.68
   7  -3   9    4.22    0.77
  -7   3   9    4.69    0.83
   7   3   9    3.88    0.67
  -7  -3   9    3.53    0.62
   8   3   9    1.02    0.69
  -8  -3   9   -0.02    0.59
   8  -3   9    0.47    0.61
  -8   3   9    0.48    0.72
   8   3   9    0.34    0.61
  -8  -3   9    0.01    0.51
   9  -3   9    0.50    0.65
  -9   3   9    0.22    0.68
   9   3   9    0.27    0.62
  -9  -3   9    0.21    0.56
  10  -3   9   10.28    0.99
  10   3   9   10.07    0.92
 -10  -3   9   10.06    0.84
 -10   3   9   10.51    1.01
 -11  -3   9    0.13    0.56
  11  -3   9    0.50    0.67
 -11   3   9    0.49    0.76
  11   3   9    0.57    0.64
  12  -3   9   10.61    1.01
  12   3   9    9.60    0.92
 -12  -3   9    9.77    0.85
 -12   3   9   10.33    1.01
 -13  -3   9    1.32    0.62
 -13   3   9    1.60    0.74
  13  -3   9    1.50    0.73
  13   3   9    0.82    0.66
 -14  -3   9    1.14    0.61
 -14   3   9    0.86    0.77
  14  -3   9    0.86    0.74
  14   3   9    1.43    0.69
 -15  -3   9   -0.15    0.60
 -15   3   9    0.15    0.79
  15  -3   9    0.47    0.77
  15   3   9   -0.08    0.71
 -16  -3   9    1.49    0.71
 -16   3   9    1.66    0.82
  16  -3   9    1.94    0.76
  16   3   9    1.70    0.78
 -17  -3   9    1.07    0.67
 -17   3   9    2.04    0.81
  17  -3   9    1.00    0.75
  17   3   9    1.65    0.76
 -18  -3   9    0.23    0.70
 -18   3   9   -0.51    0.80
  18  -3   9    0.17    0.81
  18   3   9    0.16    0.80
 -19   3   9    1.96    0.82
 -19  -3   9    1.02    0.76
  19  -3   9    2.03    0.74
  19   3   9    0.99    0.83
 -20   3   9    1.10    0.81
 -20  -3   9    1.43    0.82
  20  -3   9    1.25    0.80
  20   3   9    1.12    0.85
 -21  -3   9    1.69    0.86
  21  -3   9    1.65    0.81
  21   3   9    1.19    0.89
 -21   3   9    1.79    0.81
 -22  -3   9    3.32    0.91
  22  -3   9    2.68    0.88
  22   3   9    4.44    1.03
 -22   3   9    3.87    0.92
  23  -3   9    0.86    0.82
  23   3   9    0.50    0.98
  24  -3   9    1.56    0.87
   0  -3  10    0.42    0.68
   0   3  10   -0.19    0.70
   0   3  10    0.09    0.57
  -1  -3  10    7.47    0.89
   1  -3  10    8.00    0.92
  -1  -3  10    8.41    0.77
  -1   3  10    8.23    0.78
   1   3  10    7.58    0.78
  -1   3  10    7.12    0.91
   1   3  10    8.30    0.93
  -2  -3  10    1.30    0.71
   2  -3  10    0.93    0.66
  -2   3  10    0.88    0.73
   2   3  10    1.33    0.74
  -2   3  10    0.85    0.57
   2   3  10    2.19    0.64
  -2  -3  10    0.37    0.56
  -3  -3  10    1.81    0.68
   3  -3  10    1.17    0.66
  -3   3  10    1.33    0.76
   3   3  10    0.93    0.71
  -3   3  10    1.46    0.59
   3   3  10    1.76    0.63
  -3  -3  10    1.85    0.60
  -4  -3  10    4.18    0.77
   4  -3  10    4.83    0.80
  -4   3  10    5.01    0.85
  -4  -3  10    4.75    0.66
  -4   3  10    4.85    0.68
   4   3  10    3.99    0.83
   4   3  10    3.96    0.72
  -5  -3  10    4.12    0.75
   5  -3  10    5.74    0.88
  -5   3  10    5.06    0.84
  -5   3  10    3.83    0.63
   5   3  10    4.59    0.82
   5   3  10    4.05    0.71
  -5  -3  10    4.31    0.68
  -6  -3  10    0.06    0.64
   6  -3  10    1.18    0.73
  -6   3  10    0.81    0.78
  -6   3  10    1.22    0.53
   6   3  10    0.60    0.72
   6   3  10    0.72    0.60
  -6  -3  10    0.39    0.54
  -7  -3  10    2.45    0.69
   7  -3  10    2.48    0.71
  -7   3  10    1.59    0.72
   7   3  10    2.65    0.67
  -7  -3  10    3.57    0.66
  -8  -3  10    1.38    0.64
   8  -3  10    1.41    0.74
  -8   3  10    1.43    0.75
   8   3  10    1.07    0.65
  -8  -3  10    1.24    0.56
   9  -3  10    2.99    0.79
  -9   3  10    2.14    0.79
   9   3  10    2.45    0.72
  -9  -3  10    2.73    0.62
  10  -3  10    6.57    0.90
 -10   3  10    6.20    0.95
  10   3  10    6.25    0.83
 -10  -3  10    6.50    0.76
 -11   3  10    1.15    0.75
  11  -3  10    1.37    0.77
  11   3  10    1.81    0.71
 -11  -3  10    1.52    0.61
 -12   3  10    6.61    0.99
  12  -3  10    6.27    0.96
  12   3  10    6.71    0.89
 -12  -3  10    6.47    0.79
 -13  -3  10    1.67    0.65
 -13   3  10    1.93    0.81
  13  -3  10    2.06    0.83
  13   3  10    2.07    0.75
  14  -3  10   10.87    1.13
  14   3  10    9.31    1.02
 -14  -3  10   10.12    0.94
 -14   3  10    9.82    1.12
 -15  -3  10    4.21    0.80
 -15   3  10    5.00    0.95
  15  -3  10    6.38    1.00
  15   3  10    5.30    0.92
  16  -3  10   14.65    1.26
  16   3  10   12.90    1.16
 -16  -3  10   14.73    1.09
 -16   3  10   15.24    1.25
 -17  -3  10    1.86    0.74
 -17   3  10    2.17    0.93
  17  -3  10    1.75    0.85
  17   3  10    0.86    0.83
 -18   3  10    0.04    0.90
 -18  -3  10   -0.19    0.77
  18  -3  10   -0.03    0.79
  18   3  10    0.71    0.80
 -19  -3  10   -0.02    0.79
  19  -3  10    0.05    0.84
  19   3  10   -0.16    0.84
 -19   3  10   -0.03    0.87
 -20  -3  10    0.35    0.78
  20  -3  10    0.05    0.86
  20   3  10    0.25    0.87
 -20   3  10    1.02    0.88
  21  -3  10    2.45    0.89
  21   3  10    1.93    0.93
   0  -3  11   14.88    1.19
   0   3  11   15.77    1.04
   0   3  11   12.79    1.13
  -1  -3  11    1.03    0.76
   1  -3  11    1.82    0.76
  -1   3  11    1.40    0.81
   1   3  11    0.67    0.78
  -1   3  11    1.04    0.65
   1   3  11    1.06    0.64
  -2  -3  11    7.25    0.95
   2  -3  11    6.72    0.95
  -2   3  11    6.15    0.95
   2   3  11    6.63    0.93
  -2   3  11    6.31    0.81
  -2  -3  11    6.71    0.78
   2   3  11    6.48    0.83
  -3  -3  11    3.82    0.84
   3  -3  11    3.60    0.84
  -3   3  11    3.23    0.87
   3   3  11    4.20    0.86
  -3   3  11    3.89    0.74
   3   3  11    2.90    0.74
  -3  -3  11    4.80    0.70
  -4  -3  11    1.37    0.78
   4  -3  11    0.99    0.75
  -4   3  11    1.71    0.86
   4   3  11    1.35    0.78
  -4   3  11    1.22    0.64
   4   3  11    0.45    0.67
  -4  -3  11    1.30    0.62
  -5  -3  11   65.02    2.04
   5  -3  11   67.71    2.20
  -5   3  11   64.43    1.81
  -5  -3  11   67.58    1.83
   5   3  11   61.54    1.89
  -5   3  11   67.82    2.22
  -6  -3  11    1.25    0.73
   6  -3  11    1.76    0.82
  -6   3  11    1.04    0.83
  -6   3  11    1.36    0.63
   6   3  11    0.99    0.67
  -6  -3  11    1.31    0.61
  -7  -3  11    6.97    0.93
   7  -3  11    6.98    1.01
   7   3  11    7.53    0.91
  -7  -3  11    6.54    0.79
  -7   3  11    7.56    1.03
  -8   3  11    0.03    0.82
   8  -3  11   -0.18    0.77
   8   3  11    0.17    0.69
  -8  -3  11    0.30    0.60
  -9   3  11    0.68    0.88
   9  -3  11    0.64    0.85
   9   3  11   -0.09    0.67
  -9  -3  11    0.65    0.61
 -10   3  11    3.38    0.90
  10  -3  11    4.20    0.89
  10   3  11    3.51    0.80
 -10  -3  11    1.99    0.64
 -11   3  11    0.49    0.88
  11  -3  11    1.08    0.84
  11   3  11    0.38    0.79
 -11  -3  11    0.71    0.64
  12  -3  11   23.67    1.50
  12   3  11   22.81    1.38
 -12  -3  11   22.93    1.23
 -12   3  11   23.68    1.53
 -13   3  11    2.51    0.88
  13  -3  11    1.50    0.86
  13   3  11    2.08    0.80
 -13  -3  11    1.54    0.73
 -14   3  11    0.22    0.91
  14  -3  11   -0.57    0.84
  14   3  11    0.44    0.82
 -14  -3  11    0.15    0.72
 -15   3  11    0.25    0.86
  15  -3  11    0.08    0.83
  15   3  11   -0.12    0.83
 -15  -3  11    0.13    0.73
 -16  -3  11    0.17    0.75
 -16   3  11    0.20    0.93
  16  -3  11    0.74    0.83
  16   3  11    0.96    0.85
  17  -3  11   38.94    1.86
  17   3  11   35.63    1.74
 -17  -3  11   36.34    1.64
 -17   3  11   39.85    1.90
 -18  -3  11    1.26    0.79
  18  -3  11    0.90    0.90
  18   3  11    1.00    0.91
   0  -3  12    0.20    0.83
   0   3  12    0.18    0.87
   0   3  12   -0.26    0.71
  -1  -3  12    9.62    1.14
   1  -3  12    9.38    1.16
  -1   3  12   10.25    0.96
   1   3  12   10.41    0.97
  -1   3  12   11.35    1.17
   1   3  12    9.50    1.11
  -2  -3  12    1.95    0.85
   2  -3  12    1.33    0.88
  -2   3  12    2.07    0.89
   2   3  12    1.61    0.87
  -2   3  12    1.68    0.67
   2   3  12    1.60    0.75
  -3   3  12    2.35    0.92
  -3  -3  12    1.73    0.86
   3  -3  12    1.34    0.90
  -3  -3  12    1.70    0.69
  -3   3  12    1.73    0.68
   3   3  12    1.37    0.71
  -4   3  12    0.50    0.88
  -4  -3  12   -0.19    0.84
   4  -3  12   -0.65    0.91
  -4   3  12    0.07    0.70
   4   3  12   -0.34    0.79
  -4  -3  12    0.21    0.65
  -5   3  12    0.37    0.89
  -5  -3  12    0.69    0.86
   5  -3  12    0.85    0.88
  -5   3  12    0.71    0.65
   5   3  12    0.40    0.75
  -5  -3  12    0.57    0.64
  -6   3  12    6.65    1.06
  -6  -3  12    6.66    0.99
   6  -3  12    6.20    1.06
  -6   3  12    6.06    0.82
   6   3  12    6.18    0.91
  -6  -3  12    5.05    0.78
  -7   3  12    0.15    0.89
   7  -3  12    0.38    0.87
   7   3  12   -0.05    0.79
  -7  -3  12    0.63    0.68
  -8   3  12    3.94    0.97
   8  -3  12    4.61    1.01
   8   3  12    3.10    0.86
  -8  -3  12    4.43    0.79
  -9   3  12    1.13    0.89
   9  -3  12    0.45    0.92
   9   3  12    1.99    0.81
  -9  -3  12    1.64    0.71
  10  -3  12   10.52    1.20
  10   3  12    9.71    1.06
 -10  -3  12   10.44    0.97
 -10   3  12   10.72    1.23
 -11   3  12    1.96    1.03
  11  -3  12    3.44    0.99
  11   3  12    2.30    0.86
 -11  -3  12    1.91    0.71
 -12   3  12    2.12    0.92
  12  -3  12    3.24    1.02
  12   3  12    2.89    0.92
 -12  -3  12    2.37    0.72
 -13   3  12    0.35    0.92
  13  -3  12    0.21    0.89
  13   3  12   -0.16    0.85
 -13  -3  12    0.23    0.67
  14  -3  12    1.17    0.87
  14   3  12    0.75    0.82
 -14  -3  12    0.80    0.72
 -14   3  12    0.43    1.00
  15   3  12    0.46    0.89
 -15  -3  12   -0.03    0.76
   0  -3  13   25.74    1.67
   0   3  13   26.13    1.42
  -1   3  13    1.79    0.95
  -1  -3  13    1.16    0.94
   1  -3  13    1.16    0.97
   1   3  13    0.82    0.78
  -1   3  13    1.10    0.75
  -2   3  13    0.21    0.92
   2  -3  13    0.16    0.93
  -2   3  13    0.18    0.76
   2   3  13    0.26    0.79
  -3   3  13    0.64    0.91
  -3  -3  13    0.23    0.96
   3  -3  13    0.10    0.99
  -3   3  13    0.24    0.73
   3   3  13   -0.02    0.82
  -4   3  13    0.12    0.96
  -4  -3  13    0.70    0.97
   4  -3  13   -0.10    1.01
  -4   3  13    0.35    0.71
   4   3  13    0.15    0.79
   5  -3  13   23.33    1.67
  -5   3  13   21.14    1.28
  -5  -3  13   23.69    1.28
   5   3  13   22.38    1.37
  -5   3  13   23.00    1.57
   6  -3  13   16.50    1.49
  -6  -3  13   16.07    1.12
   6   3  13   15.68    1.23
  -6   3  13   18.46    1.48
  -7   3  13    7.02    1.18
   7  -3  13    6.07    1.10
  -7  -3  13    8.47    0.93
   7   3  13    6.05    0.97
  -8   3  13    1.28    0.94
   8  -3  13    1.46    1.01
   8   3  13    1.31    0.85
  -8  -3  13    1.18    0.72
  -9   3  13    0.36    1.00
   9  -3  13   -0.57    1.05
   9   3  13   -0.06    0.86
  -9  -3  13    0.00    0.76
 -10   3  13    0.92    0.98
  10  -3  13    1.76    0.99
  10   3  13    1.85    0.84
 -10  -3  13    1.85    0.75
  11   3  13    0.96    0.82
 -11  -3  13    0.99    0.73
 -11   3  13    1.35    0.97
 -12  -3  13    5.17    0.85
   0  -3  14   -0.24    1.07
   0   3  14    0.02    0.80
  -1  -3  14    1.17    1.09
   1  -3  14    0.86    1.08
  -2  -3  14    2.40    1.10
   2  -3  14    1.28    1.02
  -3   3  14    0.95    0.97
  -3  -3  14   -0.27    1.01
   3  -3  14    0.37    1.00
  -4   3  14    0.04    1.03
   4  -3  14    0.45    1.10
  -5   3  14    0.83    1.05
  -6   3  14    0.14    1.05
  -7   3  14    1.03    0.98
   0  -4   0  464.12    4.18
   0  -4   0  448.80    3.02
   1  -4   0    0.33    0.64
  -1  -4   0    0.49    0.63
   1  -4   0    0.33    0.34
  -1  -4   0    0.35    0.37
   2  -4   0    4.31    0.68
  -2  -4   0    4.98    0.73
  -2  -4   0    4.30    0.47
   3  -4   0    0.47    0.56
  -3  -4   0    0.41    0.66
  -3  -4   0    0.00    0.37
   4  -4   0    5.94    0.73
  -4  -4   0    5.48    0.76
  -4  -4   0    5.91    0.52
  -5  -4   0    0.03    0.40
   5  -4   0    1.24    0.56
  -5  -4   0    0.60    0.61
  -6  -4   0    2.74    0.46
   6  -4   0    3.11    0.59
  -6  -4   0    3.10    0.71
  -7  -4   0    0.40    0.40
   7  -4   0    0.29    0.57
  -7  -4   0    0.17    0.61
  -7   4   0    0.23    0.67
  -8  -4   0    1.75    0.48
  -8   4   0    1.48    0.70
   8  -4   0    1.19    0.59
  -8  -4   0    1.20    0.66
  -9  -4   0    0.18    0.45
  -9   4   0    0.46    0.68
   9  -4   0    0.12    0.59
  -9  -4   0    0.48    0.65
  10  -4   0   68.10    1.68
 -10   4   0   66.53    1.76
 -10  -4   0   65.76    1.78
 -10  -4   0   67.17    1.59
 -11  -4   0    0.34    0.50
 -11   4   0    0.44    0.67
  11  -4   0    0.29    0.58
 -11  -4   0    0.40    0.68
 -12   4   0  110.71    2.21
  12  -4   0  110.90    2.12
 -12  -4   0  110.75    2.27
 -12  -4   0  109.31    2.15
 -13  -4   0    0.53    0.57
  13  -4   0    0.30    0.53
 -13  -4   0    0.68    0.67
 -13   4   0    0.05    0.67
 -14   4   0    5.32    0.74
  14  -4   0    6.03    0.68
 -14  -4   0    4.50    0.72
 -14  -4   0    5.20    0.76
 -15  -4   0   -0.28    0.64
 -15   4   0    0.15    0.66
  15  -4   0    0.05    0.54
 -15  -4   0    0.87    0.64
 -16   4   0   12.29    0.91
  16  -4   0   12.04    0.85
 -16  -4   0   11.62    0.99
 -17   4   0    0.56    0.62
 -17  -4   0    0.18    0.70
  17  -4   0    0.00    0.54
 -18   4   0   10.82    0.86
  18  -4   0    9.72    0.82
 -18  -4   0   10.97    1.05
 -19  -4   0   -0.05    0.76
  19  -4   0    0.05    0.56
 -19   4   0    0.06    0.61
  20  -4   0    6.09    0.74
 -20  -4   0    7.44    1.01
 -21  -4   0    0.92    0.83
 -22  -4   0   78.80    2.43
 -23  -4   0    0.19    0.87
 -24  -4   0   12.40    1.23
 -25  -4   0   -0.47    0.92
 -26  -4   0    0.17    0.96
   0  -4   1    0.13    0.59
   0  -4  -1    0.45    0.58
   0  -4  -1    0.14    0.31
   0  -4   1    0.09    0.36
   1  -4   1    2.77    0.62
  -1  -4   1    3.51    0.66
   1  -4  -1    2.52    0.68
  -1  -4  -1    3.26    0.66
  -1  -4  -1    2.87    0.38
   1  -4   1    2.79    0.42
  -1  -4   1    2.97    0.44
   2  -4   1    0.13    0.60
  -2  -4   1    0.09    0.59
   2  -4  -1    0.39    0.62
  -2  -4  -1    0.26    0.62
  -2  -4  -1    0.21    0.32
  -2  -4   1    0.11    0.37
   3  -4   1    0.62    0.62
  -3  -4   1    0.48    0.63
   3  -4  -1    0.30    0.55
  -3  -4  -1    0.93    0.62
  -3  -4  -1    0.38    0.35
  -3  -4   1    0.13    0.40
   4  -4   1   -0.14    0.55
  -4  -4   1   -0.09    0.64
   4  -4  -1    0.46    0.60
  -4  -4   1    0.00    0.40
  -4  -4  -1    0.17    0.33
  -5  -4   1    0.60    0.41
  -5  -4  -1    0.38    0.36
  -5   4   1    0.83    0.74
   5  -4   1    0.24    0.58
  -5  -4   1    1.30    0.60
   5  -4  -1    1.09    0.59
  -6  -4   1    1.45    0.44
  -6  -4  -1    1.53    0.40
   6  -4   1    0.87    0.54
  -6   4   1    2.48    0.71
  -6  -4   1    1.27    0.66
   6  -4  -1    2.05    0.57
  -7  -4   1    0.94    0.42
  -7  -4  -1    1.09    0.41
   7  -4   1    0.81    0.60
   7  -4  -1    0.98    0.55
  -7  -4   1    0.97    0.62
  -7   4   1    1.79    0.70
  -8  -4   1    2.10    0.48
  -8  -4  -1    2.12    0.46
  -8   4   1    2.56    0.73
   8  -4   1    1.23    0.55
   8  -4  -1    2.49    0.61
  -8  -4   1    1.91    0.64
  -9  -4   1    0.72    0.46
  -9  -4  -1    0.52    0.40
   9  -4   1    0.80    0.54
   9  -4  -1    0.72    0.57
  -9  -4   1    0.40    0.64
  -9   4  -1    1.51    0.65
  -9   4   1    1.10    0.70
 -10  -4   1    0.60    0.49
 -10  -4  -1    0.20    0.48
 -10   4   1    0.52    0.70
  10  -4   1    0.93    0.51
  10  -4  -1    0.56    0.57
 -10   4  -1    0.89    0.66
 -10  -4   1    0.29    0.65
 -11   4   1   30.98    1.32
  11  -4   1   31.23    1.21
  11  -4  -1   29.75    1.18
 -11  -4   1   30.36    1.30
 -11   4  -1   32.68    1.28
 -11  -4   1   31.13    1.21
 -11  -4  -1   28.80    1.13
 -12  -4   1    1.42    0.59
 -12  -4  -1    1.30    0.55
 -12   4  -1    1.30    0.64
  12  -4   1    1.81    0.56
  12  -4  -1    1.46    0.58
 -12  -4   1    1.69    0.67
 -12   4   1    1.26    0.68
 -13   4  -1    2.27    0.66
 -13  -4   1    1.79    0.62
 -13  -4  -1    1.94    0.59
  13  -4   1    1.63    0.55
  13  -4  -1    1.81    0.60
 -13  -4   1    1.99    0.70
 -13   4   1    1.52    0.68
 -14  -4   1    0.75    0.62
 -14  -4  -1    0.48    0.59
 -14   4   1    0.87    0.68
  14  -4   1    1.09    0.53
  14  -4  -1    0.13    0.57
 -14  -4   1    0.69    0.63
 -14   4  -1    0.61    0.64
 -15  -4   1    0.10    0.65
 -15  -4  -1    0.43    0.65
 -15   4   1   -0.14    0.66
  15  -4   1    0.38    0.54
  15  -4  -1    0.24    0.56
 -15   4  -1    0.24    0.63
 -16   4   1    2.38    0.64
 -16  -4   1    1.88    0.69
 -16  -4  -1    1.69    0.68
 -16   4  -1    1.42    0.62
  16  -4   1    1.87    0.59
  16  -4  -1    2.01    0.57
 -17  -4   1    0.20    0.71
 -17   4  -1    1.19    0.61
 -17  -4  -1    0.64    0.71
  17  -4   1    0.34    0.56
  17  -4  -1    0.80    0.55
 -17   4   1    1.08    0.64
 -18  -4   1    1.35    0.77
 -18  -4  -1    0.53    0.71
  18  -4   1    0.74    0.57
  18  -4  -1    0.74    0.55
 -18   4   1    0.09    0.63
  19  -4   1   11.33    0.89
  19  -4  -1   10.52    0.84
 -19  -4   1   10.23    1.06
 -19  -4  -1    9.01    1.00
 -19   4   1   11.05    0.90
 -20  -4   1    0.09    0.80
 -20  -4  -1    0.22    0.78
  20  -4   1    0.10    0.60
 -20   4   1    0.37    0.66
  21  -4   1   15.91    1.01
 -21  -4   1   15.54    1.29
 -21  -4  -1   14.95    1.22
 -22  -4   1    1.26    0.86
 -22  -4  -1    2.09    0.83
 -23  -4  -1    6.93    1.07
 -23  -4   1    8.84    1.15
 -24  -4   1   -0.23    0.92
 -24  -4  -1   -0.10    0.86
 -25  -4   1    0.31    0.94
 -25  -4  -1    0.75    0.88
 -26  -4   1    0.81    0.90
 -26  -4  -1    0.75    0.89
 -27  -4  -1    0.23    0.94
   0  -4   2   26.20    1.16
   0  -4   2   26.85    0.92
   1  -4   2    0.15    0.62
  -1  -4   2    0.59    0.60
   1  -4   2    1.22    0.40
  -1  -4   2    0.73    0.42
   2  -4   2    2.37    0.63
  -2  -4   2    3.11    0.66
  -2  -4   2    2.85    0.48
   3  -4   2    2.14    0.59
  -3  -4   2    2.72    0.69
  -3   4   2    3.54    0.82
   3  -4  -2    2.86    0.69
  -3  -4   2    2.30    0.47
   4  -4   2    0.23    0.57
  -4  -4   2    0.38    0.62
   4  -4  -2    0.05    0.57
  -4   4   2    0.75    0.68
  -4  -4   2    0.25    0.43
   5  -4   2   26.53    1.14
  -5  -4   2   25.22    1.19
   5  -4  -2   27.61    1.17
  -5   4   2   27.06    1.28
  -5  -4   2   25.46    0.97
  -6  -4   2    0.76    0.44
  -6  -4  -2    0.87    0.36
  -6   4   2    1.51    0.75
   6  -4   2    1.57    0.51
  -6  -4   2    1.22    0.64
   6  -4  -2    1.19    0.62
   7  -4   2    5.80    0.69
   7  -4  -2    5.10    0.71
  -7  -4   2    4.93    0.76
  -7  -4   2    4.74    0.56
  -7  -4  -2    4.84    0.49
  -7   4   2    5.21    0.84
  -8  -4   2    0.66    0.44
  -8  -4  -2    0.14    0.37
  -8   4   2    0.13    0.71
   8  -4   2    0.89    0.50
  -8  -4   2    0.40    0.68
   8  -4  -2    0.27    0.60
  -9   4   2   21.04    1.16
   9  -4   2   19.28    1.00
  -9  -4   2   20.21    1.13
   9  -4  -2   19.63    1.02
  -9  -4   2   18.11    0.92
  -9  -4  -2   19.09    0.84
 -10   4   2    8.55    0.89
  10  -4   2    7.88    0.74
 -10  -4   2    6.79    0.84
  10  -4  -2    7.21    0.75
 -10   4  -2    8.95    0.83
 -10  -4   2    7.24    0.70
 -10  -4  -2    8.36    0.68
 -11   4   2   35.63    1.41
  11  -4   2   37.80    1.32
 -11  -4   2   36.93    1.42
  11  -4  -2   37.19    1.30
 -11   4  -2   34.57    1.29
 -11  -4   2   32.38    1.25
 -11  -4  -2   35.40    1.19
 -12   4   2   13.68    1.01
  12  -4   2   14.20    0.90
 -12  -4   2   13.60    0.99
  12  -4  -2   13.88    0.90
 -12   4  -2   13.66    0.92
 -12  -4   2   12.80    0.90
 -12  -4  -2   13.22    0.87
 -13   4   2   11.50    0.95
  13  -4   2   12.41    0.86
 -13   4  -2   11.50    0.87
 -13  -4   2   10.60    0.90
  13  -4  -2   11.04    0.84
 -13  -4   2   12.01    0.92
 -13  -4  -2   11.19    0.85
 -14   4  -2    0.89    0.61
 -14  -4   2    0.69    0.62
 -14  -4  -2    0.37    0.60
 -14   4   2    0.74    0.65
  14  -4   2    1.14    0.56
  14  -4  -2    0.63    0.58
 -15   4   2    4.49    0.73
  15  -4   2    5.22    0.69
 -15  -4   2    3.41    0.72
 -15  -4  -2    3.78    0.70
  15  -4  -2    3.75    0.65
 -15   4  -2    4.20    0.68
 -16  -4   2    0.15    0.69
 -16  -4  -2    0.32    0.65
  16  -4   2   -0.03    0.58
  16  -4  -2   -0.41    0.58
 -16   4   2    0.51    0.63
 -17   4   2    6.53    0.82
  17  -4   2    6.49    0.77
  17  -4  -2    7.61    0.76
 -17  -4   2    6.80    0.90
 -17  -4  -2    6.79    0.88
 -18  -4   2   -0.33    0.76
 -18  -4  -2   -0.26    0.73
  18  -4   2    0.29    0.57
  18  -4  -2    0.45    0.57
 -18   4   2    0.71    0.62
 -19  -4   2    0.63    0.78
 -19  -4  -2    0.47    0.76
  19  -4   2    0.49    0.59
  19  -4  -2    0.59    0.55
 -19   4   2    0.75    0.66
 -20  -4   2    4.07    0.92
 -20  -4  -2    5.83    0.93
  20  -4   2    4.52    0.73
 -20   4   2    5.15    0.79
 -21  -4   2    0.60    0.86
 -21  -4  -2    0.89    0.76
  21  -4   2    0.22    0.62
 -21   4   2    0.22    0.69
 -22  -4   2    0.37    0.86
 -22  -4  -2    0.63    0.82
 -22   4   2    0.21    0.73
 -23  -4   2    0.26    0.92
 -23  -4  -2    0.21    0.85
 -24  -4   2    6.14    1.08
 -24  -4  -2    8.47    1.07
 -25  -4   2    0.71    0.92
 -25  -4  -2    0.12    0.83
 -26  -4   2    0.57    0.92
 -26  -4  -2    0.49    0.86
 -27  -4  -2    1.42    0.95
   0  -4   3    0.52    0.58
   0  -4   3    0.19    0.42
   1  -4   3    2.96    0.66
  -1  -4   3    2.83    0.61
  -1   4   3    2.83    0.82
   1  -4   3    3.03    0.48
  -1  -4   3    2.83    0.49
  -2   4   3    2.95    0.75
   2  -4   3    2.77    0.63
  -2  -4   3    2.55    0.65
   2  -4   3    2.65    0.46
  -2  -4   3    2.76    0.49
   3  -4   3    1.24    0.60
  -3  -4   3    1.22    0.61
  -3   4   3    2.87    0.82
  -3  -4   3    1.88    0.46
  -4   4   3    4.50    0.81
   4  -4   3    4.14    0.66
  -4  -4   3    4.25    0.72
  -4  -4   3    4.32    0.55
   5  -4   3    0.87    0.53
  -5  -4   3    0.21    0.62
  -5   4   3    1.30    0.77
  -5  -4   3    0.66    0.44
  -6  -4   3    0.13    0.47
   6  -4   3   -0.13    0.51
  -6   4   3    0.44    0.69
  -6  -4   3   -0.11    0.65
   6  -4  -3    0.55    0.63
  -7  -4   3    0.24    0.48
  -7   4   3    0.65    0.76
   7  -4   3    0.18    0.56
  -7  -4   3   -0.27    0.66
   7  -4  -3    0.53    0.63
  -8  -4   3    1.36    0.48
   8  -4   3    1.01    0.52
  -8  -4   3    0.72    0.64
   8  -4  -3    1.81    0.67
  -8   4   3    1.37    0.73
  -9  -4   3    1.76    0.53
   9  -4   3    1.69    0.61
  -9  -4   3    1.45    0.68
   9  -4  -3    1.54    0.64
  -9   4   3    1.71    0.69
 -10  -4   3    1.61    0.53
  10  -4   3    3.16    0.60
 -10  -4   3    2.28    0.68
  10  -4  -3    2.45    0.63
 -10   4   3    2.32    0.77
 -11  -4   3    0.30    0.55
  11  -4   3    0.70    0.57
 -11   4   3   -0.40    0.76
 -11  -4   3    0.24    0.65
  11  -4  -3    0.81    0.56
 -11   4  -3    0.49    0.60
 -12  -4   3    3.58    0.65
  12  -4  -3    5.55    0.72
 -12   4  -3    4.69    0.69
 -12   4   3    3.52    0.78
  12  -4   3    4.77    0.69
 -12  -4   3    4.22    0.72
 -13  -4   3    0.44    0.61
 -13   4   3    0.44    0.64
  13  -4   3    1.05    0.58
  13  -4  -3    0.53    0.56
 -13   4  -3    0.95    0.65
 -14   4   3   13.73    0.99
  14  -4   3   12.84    0.90
 -14   4  -3   13.08    0.89
  14  -4  -3   11.96    0.87
 -14  -4   3   13.26    1.00
 -15  -4   3    0.53    0.67
  15  -4   3    0.29    0.55
  15  -4  -3    1.07    0.58
 -15   4   3    0.85    0.63
 -16   4   3   23.14    1.22
  16  -4   3   21.00    1.11
  16  -4  -3   22.41    1.10
 -16  -4   3   19.65    1.23
  17  -4   3    8.61    0.83
  17  -4  -3    9.87    0.84
 -17  -4   3    9.49    1.02
 -17   4   3    9.78    0.92
 -18  -4   3    0.46    0.75
  18  -4   3    0.25    0.59
  18  -4  -3   -0.22    0.60
 -18   4   3    0.62    0.69
  19  -4   3    8.55    0.87
 -19  -4   3    8.22    1.05
 -19   4   3    8.52    0.92
 -20  -4   3   -0.04    0.86
  20  -4   3    0.60    0.62
 -20   4   3    0.32    0.75
 -21  -4   3    1.04    0.85
  21  -4   3    1.42    0.65
 -21   4   3    1.32    0.73
 -22  -4   3   -0.16    0.88
  22  -4   3   -0.09    0.66
 -22   4   3   -0.32    0.76
 -23  -4   3    1.48    0.95
 -23   4   3    2.29    0.81
 -24  -4   3    1.13    0.86
 -25  -4   3    1.10    0.97
   0  -4   4   58.33    1.66
   0   4   4   57.43    1.84
   0  -4   4   55.93    1.40
   1  -4   4   11.19    0.87
  -1  -4   4    9.79    0.83
  -1   4   4   10.71    1.00
   1   4   4    9.46    1.01
   1  -4   4    8.98    0.67
  -1  -4   4   10.13    0.71
   2  -4   4    0.20    0.52
  -2  -4   4    0.29    0.61
   2  -4   4    0.08    0.45
   2   4   4    1.41    0.80
  -2   4   4    0.31    0.71
  -2  -4   4    0.09    0.47
   3  -4   4    1.24    0.55
  -3  -4   4    1.86    0.59
  -3  -4   4    1.58    0.50
  -4   4   4    0.76    0.79
   4  -4   4    1.17    0.53
  -4  -4   4    1.09    0.60
  -4  -4   4    0.34    0.49
   5  -4   4   63.84    1.71
  -5   4   4   64.98    1.90
  -5  -4   4   64.53    1.54
  -6   4   4   59.55    1.85
   6  -4   4   59.81    1.65
  -6  -4   4   59.55    1.72
  -6  -4   4   57.70    1.49
  -7   4   4   28.98    1.37
   7  -4   4   30.98    1.26
  -7  -4   4   29.72    1.29
  -7  -4   4   29.07    1.12
  -8  -4   4    0.44    0.51
   8  -4   4    0.04    0.57
  -8  -4   4   -0.01    0.61
  -8   4   4    0.77    0.75
  -9  -4   4    3.96    0.63
   9  -4   4    4.26    0.64
  -9  -4   4    4.53    0.74
  -9   4   4    3.12    0.80
   9  -4  -4    4.98    0.73
 -10   4   4    8.13    0.95
  10  -4   4    7.18    0.78
 -10  -4   4    6.21    0.77
  10  -4  -4    7.05    0.79
 -10  -4   4    6.29    0.70
 -11   4   4   19.50    1.16
  11  -4   4   21.16    1.09
 -11  -4   4   20.04    1.10
  11  -4  -4   19.96    1.06
 -11  -4   4   19.51    1.05
 -12   4   4   17.16    1.13
  12  -4   4   16.48    1.01
 -12  -4   4   17.46    1.04
  12  -4  -4   19.15    1.03
 -12   4  -4   15.94    0.93
 -12  -4   4   15.95    1.01
 -13   4   4    0.22    0.66
 -13  -4   4    0.33    0.61
  13  -4   4    0.04    0.58
  13  -4  -4    0.77    0.59
 -14  -4   4    1.41    0.64
  14  -4   4    2.28    0.61
  14  -4  -4    2.33    0.62
 -14   4   4    2.68    0.72
 -15  -4   4    1.57    0.65
  15  -4   4    1.62    0.60
  15  -4  -4    1.66    0.62
 -15   4   4    2.21    0.73
  16  -4   4   23.96    1.21
  16  -4  -4   25.09    1.16
 -16  -4   4   24.70    1.36
 -16   4   4   23.94    1.27
  17  -4   4   40.97    1.52
  17  -4  -4   42.87    1.45
 -17  -4   4   37.86    1.66
 -17   4   4   40.33    1.57
 -18  -4   4    2.73    0.86
  18  -4   4    2.24    0.67
 -18   4   4    2.47    0.78
 -19  -4   4    1.40    0.84
  19  -4   4    1.98    0.68
 -19   4   4    1.27    0.73
  20  -4   4    6.51    0.83
 -20  -4   4    6.33    1.04
 -20   4   4    6.04    0.90
 -21  -4   4    1.68    0.93
  21  -4   4    1.03    0.68
 -21   4   4    0.08    0.78
  22  -4   4   27.27    1.36
 -22  -4   4   26.84    1.64
 -23  -4   4    1.84    0.91
 -23   4   4    2.50    0.86
 -24  -4   4    0.17    0.99
 -24   4   4   -0.33    0.79
   0  -4   5    0.24    0.60
   0   4   5    0.52    0.76
   0   4   5    0.01    0.38
   0  -4   5    0.22    0.48
   1  -4   5   17.91    1.04
  -1  -4   5   17.24    1.03
  -1   4   5   17.84    1.20
   1   4   5   17.20    1.19
  -1   4   5   16.78    0.74
   1   4   5   16.92    0.75
   1  -4   5   18.02    0.91
  -1  -4   5   15.92    0.88
   2  -4   5    6.30    0.78
  -2  -4   5    6.68    0.79
  -2   4   5    7.02    0.92
   2   4   5    6.27    0.95
  -2   4   5    6.20    0.51
   2   4   5    6.84    0.56
  -2  -4   5    6.34    0.66
   3  -4   5   13.27    0.94
  -3  -4   5   13.53    0.96
  -3   4   5   11.64    1.06
   3   4   5   12.36    1.13
   3   4   5   12.05    0.69
  -3  -4   5   13.45    0.83
   4  -4   5    6.29    0.74
  -4  -4   5    5.53    0.74
   4   4   5    6.76    0.95
   4   4   5    5.55    0.55
  -4  -4   5    6.09    0.66
  -4   4   5    5.52    0.94
  -5   4   5   11.99    1.08
   5  -4   5   13.60    0.93
  -5  -4   5   12.88    0.95
   5   4   5   13.09    1.14
   5   4   5   13.66    0.74
  -5  -4   5   12.77    0.83
   6   4   5    0.54    0.83
   6  -4   5    0.50    0.55
  -6  -4   5    1.02    0.62
  -6   4   5   -0.04    0.80
   6   4   5    0.27    0.43
  -6  -4   5   -0.04    0.51
   7  -4   5    0.77    0.57
  -7  -4   5    0.56    0.61
  -7   4   5   -0.12    0.75
   7   4   5    0.04    0.44
   7   4   5    1.87    0.87
  -7  -4   5    0.26    0.50
  -8  -4   5    0.37    0.54
  -8   4   5   -0.08    0.80
   8  -4   5    0.45    0.58
  -8  -4   5   -0.17    0.61
   8   4   5    0.05    0.48
  -9  -4   5   -0.07    0.57
  -9   4   5   -0.15    0.81
   9  -4   5    0.09    0.61
  -9  -4   5    0.21    0.63
   9   4   5    0.03    0.47
 -10  -4   5    2.23    0.58
 -10   4   5    2.04    0.68
  10  -4   5    1.96    0.62
 -10  -4   5    2.29    0.66
  10   4   5    2.25    0.55
 -11  -4   5    0.76    0.54
 -11   4   5    1.64    0.74
  11  -4   5    0.83    0.58
 -11  -4   5    0.54    0.60
  11  -4  -5    1.19    0.63
 -12  -4   5    2.95    0.63
  12  -4   5    2.61    0.69
  12  -4  -5    2.84    0.65
 -12   4   5    3.27    0.77
 -13  -4   5    3.87    0.70
  13  -4   5    3.32    0.67
  13  -4  -5    3.59    0.68
 -13   4   5    4.76    0.80
  14  -4   5   10.22    0.90
  14  -4  -5    8.87    0.82
 -14  -4   5    7.23    0.84
 -14   4   5    8.89    0.95
 -15  -4   5    4.16    0.79
  15  -4  -5    5.19    0.73
  15  -4   5    5.24    0.76
 -15   4   5    5.30    0.81
  16  -4   5   18.96    1.12
  16  -4  -5   19.73    1.06
 -16  -4   5   18.04    1.21
 -16   4   5   19.70    1.25
 -17  -4   5    0.91    0.77
  17  -4   5    1.31    0.63
 -17   4   5    1.35    0.73
 -18  -4   5    0.31    0.81
  18  -4   5    0.59    0.65
 -18   4   5   -0.01    0.79
  19  -4   5    9.14    0.95
 -19  -4   5    6.82    0.99
 -19   4   5   10.04    1.03
 -20  -4   5    0.59    0.83
  20  -4   5   -0.03    0.70
 -20   4   5   -0.14    0.79
  21  -4   5   12.40    1.07
 -21  -4   5   10.06    1.16
 -21   4   5   12.16    1.15
  22  -4   5   10.31    1.02
 -22  -4   5    9.59    1.18
 -22   4   5   10.50    1.09
 -23  -4   5    0.14    0.98
 -23   4   5    0.48    0.82
  23  -4   5    0.06    0.72
 -24   4   5    2.15    0.88
 -25   4   5    5.82    0.99
   0   4   6    1.92    0.90
   0  -4   6    3.12    0.68
   0   4   6    2.16    0.46
   0  -4   6    2.64    0.58
   1  -4   6   10.47    0.89
  -1  -4   6   10.41    0.91
  -1   4   6    9.73    1.07
   1   4   6   10.42    1.09
  -1   4   6   10.15    0.67
   1  -4   6   10.97    0.79
   1   4   6    9.27    0.66
  -1  -4   6   10.97    0.80
   2  -4   6    9.55    0.88
  -2   4   6    9.83    1.04
  -2  -4   6    8.91    0.87
   2   4   6   10.30    1.08
  -2   4   6    9.68    0.66
   2   4   6    9.38    0.67
  -2  -4   6    9.55    0.76
   3  -4   6   -0.23    0.62
  -3  -4   6    0.71    0.62
   3   4   6    0.06    0.88
  -3   4   6    0.15    0.42
  -3   4   6    0.29    0.78
   3   4   6   -0.06    0.45
  -3  -4   6    0.33    0.51
  -4   4   6   10.39    1.02
   4  -4   6   11.22    0.90
  -4  -4   6   10.16    0.91
   4   4   6   12.56    1.14
   4   4   6   10.42    0.71
  -4  -4   6   10.47    0.79
  -5   4   6   12.18    1.07
   5  -4   6   12.91    0.94
  -5  -4   6   10.57    0.90
   5   4   6   13.27    1.17
   5   4   6   13.42    0.80
  -5  -4   6   12.62    0.85
  -6   4   6   42.59    1.67
   6  -4   6   40.67    1.50
  -6  -4   6   35.99    1.42
   6   4   6   41.25    1.71
   6   4   6   39.63    1.25
  -6  -4   6   38.76    1.34
  -7   4   6    9.18    0.96
   7  -4   6    9.39    0.89
  -7  -4   6   10.20    0.89
   7   4   6   11.15    1.12
   7   4   6    9.76    0.74
  -7  -4   6    9.42    0.79
  -8   4   6    1.39    0.72
   8  -4   6    0.47    0.61
  -8  -4   6    0.08    0.60
   8   4   6    1.40    0.87
   8   4   6    0.05    0.53
  -8  -4   6   -0.08    0.53
  -9  -4   6    0.96    0.55
  -9   4   6    1.60    0.76
   9  -4   6    1.12    0.63
  -9  -4   6    0.81    0.63
   9   4   6    0.84    0.55
   9   4   6    1.24    0.84
 -10  -4   6    1.74    0.61
  10   4   6    1.86    0.86
  10  -4   6    1.91    0.62
 -10  -4   6    1.55    0.61
  10   4   6    1.71    0.57
 -10   4   6    1.91    0.79
 -11   4   6   18.20    1.20
  11  -4   6   18.64    1.11
  11   4   6   19.04    1.32
  11   4   6   18.48    1.02
 -11  -4   6   16.75    1.04
  12  -4   6    9.40    0.90
  12   4   6    9.66    1.09
  12   4   6   10.87    0.88
 -12  -4   6    8.99    0.85
 -12   4   6    9.57    0.96
 -13  -4   6    0.55    0.63
  13  -4   6    0.27    0.58
  13   4   6    1.46    0.89
  13  -4  -6    0.59    0.64
 -13   4   6    0.91    0.74
  13   4   6    0.27    0.58
 -14  -4   6    0.64    0.64
  14  -4   6    0.15    0.66
  14   4   6    1.27    0.91
  14  -4  -6   -0.11    0.65
 -14   4   6    0.21    0.80
  14   4   6    0.30    0.61
  15  -4   6    6.68    0.82
  15  -4  -6    7.20    0.82
  15   4   6    5.99    0.80
 -15  -4   6    6.61    0.87
 -15   4   6    7.08    0.91
  16  -4   6   11.42    1.01
 -16  -4   6    9.23    0.99
 -16   4   6   10.55    1.04
 -17  -4   6    2.17    0.76
  17  -4   6    2.08    0.70
 -17   4   6    2.22    0.84
  18  -4   6   14.97    1.12
 -18  -4   6   16.22    1.26
 -18   4   6   14.32    1.17
 -19  -4   6    6.88    1.05
  19  -4   6    5.79    0.90
 -19   4   6    5.55    0.95
 -20  -4   6    2.90    0.98
  20  -4   6    1.53    0.78
 -20   4   6    2.82    0.92
 -21  -4   6    0.12    0.90
 -21   4   6   -0.01    0.85
  21  -4   6    0.19    0.73
 -22  -4   6    1.24    0.90
 -22   4   6    0.80    0.85
  22  -4   6    1.32    0.76
 -23   4   6    1.52    0.85
  23  -4   6    2.02    0.78
 -24   4   6    1.21    0.86
   0  -4   7   -0.23    0.63
   0   4   7    0.59    0.83
   0   4   7   -0.29    0.48
   0  -4   7    0.81    0.54
   1  -4   7    0.71    0.66
  -1  -4   7    1.11    0.64
  -1   4   7    0.80    0.85
   1  -4   7    1.27    0.57
   1   4   7    0.91    0.86
  -1   4   7    1.05    0.47
   1   4   7    0.98    0.50
  -1  -4   7    1.84    0.57
   2  -4   7    0.27    0.64
  -2  -4   7   -0.21    0.66
  -2   4   7   -0.07    0.83
  -2   4   7    0.07    0.46
   2   4   7   -0.14    0.48
   2   4   7   -0.40    0.88
  -2  -4   7    0.67    0.55
  -3   4   7    3.83    0.86
   3  -4   7    3.51    0.70
  -3  -4   7    4.32    0.77
  -3   4   7    3.41    0.54
   3   4   7    4.04    0.61
   3   4   7    3.64    0.94
  -3  -4   7    4.38    0.65
   4   4   7    2.68    0.91
  -4   4   7    3.46    0.89
   4  -4   7    3.79    0.69
  -4  -4   7    2.66    0.71
   4   4   7    3.41    0.58
  -4  -4   7    2.99    0.62
   5   4   7    0.79    0.89
  -5   4   7    0.50    0.78
   5  -4   7    1.64    0.67
  -5  -4   7    1.16    0.66
   5   4   7    1.20    0.51
  -5  -4   7    0.86    0.54
  -6   4   7   11.45    1.08
   6  -4   7    9.91    0.91
  -6  -4   7    9.24    0.90
   6   4   7   10.64    1.14
   6   4   7   10.43    0.79
  -6  -4   7    9.90    0.81
  -7   4   7    0.40    0.75
   7   4   7    0.01    0.88
   7  -4   7    0.36    0.60
  -7  -4   7    0.57    0.62
   7   4   7   -0.19    0.53
  -7  -4   7    0.19    0.58
  -8   4   7   24.49    1.37
   8  -4   7   23.08    1.22
  -8  -4   7   24.01    1.21
   8   4   7   21.94    1.41
   8   4   7   24.39    1.11
  -8  -4   7   22.16    1.11
   9  -4   7    1.67    0.63
  -9  -4   7    1.19    0.64
   9   4   7    1.91    0.92
   9   4   7    0.61    0.56
  -9   4   7    1.55    0.75
  -9  -4   7    1.01    0.58
  10  -4   7   31.24    1.41
  10   4   7   28.00    1.55
  10   4   7   28.54    1.24
 -10  -4   7   30.14    1.32
 -10   4   7   31.84    1.50
 -11  -4   7    0.67    0.62
  11  -4   7    0.95    0.62
  11   4   7    0.53    0.91
 -11   4   7    0.99    0.76
  11   4   7    0.92    0.63
  12  -4   7    6.43    0.84
  12   4   7    6.01    0.75
 -12  -4   7    7.50    0.86
 -12   4   7    6.33    0.95
  12   4   7    6.84    1.04
 -13  -4   7    1.25    0.65
  13  -4   7    1.95    0.74
 -13   4   7    2.42    0.87
  13   4   7    1.34    0.62
 -14  -4   7    0.96    0.66
  14  -4   7    1.11    0.70
 -14   4   7    0.64    0.80
  14   4   7    0.57    0.67
 -15  -4   7    0.35    0.73
  15  -4   7    0.72    0.67
 -15   4   7    0.27    0.86
  15  -4  -7    0.78    0.67
  15   4   7    0.80    0.72
 -16  -4   7    1.02    0.71
  16  -4   7    0.31    0.75
 -16   4   7    0.48    0.85
  16   4   7    0.27    0.72
 -17  -4   7    0.70    0.75
  17  -4   7    0.14    0.72
 -17   4   7   -0.17    0.81
  17   4   7    0.75    0.73
 -18  -4   7    0.33    0.82
  18  -4   7   -0.15    0.79
 -18   4   7    0.20    0.81
  18   4   7    0.00    0.75
 -19  -4   7    3.62    0.93
 -19   4   7    3.19    0.93
  19  -4   7    3.65    0.85
 -20  -4   7    1.36    0.91
 -20   4   7    0.79    0.92
  20  -4   7    0.85    0.76
 -21  -4   7    0.32    0.93
 -21   4   7    0.05    0.86
  21  -4   7    0.47    0.78
 -22   4   7    5.10    0.99
  22  -4   7    6.03    0.99
  23  -4   7    0.49    0.83
   0   4   8    4.85    0.98
   0  -4   8    5.52    0.82
   0   4   8    5.81    0.67
   0  -4   8    4.59    0.69
  -1   4   8    8.40    1.08
   1   4   8    9.32    1.12
   1  -4   8    9.83    0.95
  -1  -4   8    8.57    0.90
  -1   4   8    9.83    0.78
   1   4   8    9.42    0.78
  -1  -4   8   10.66    0.87
  -2   4   8    0.83    0.76
   2  -4   8    1.39    0.67
  -2  -4   8    1.75    0.68
   2   4   8    0.81    0.90
  -2   4   8    0.83    0.52
   2   4   8    0.89    0.55
  -2  -4   8    1.18    0.60
  -3   4   8    1.60    0.83
   3  -4   8    1.79    0.66
  -3  -4   8    1.56    0.69
   3   4   8    1.13    0.87
  -3   4   8    1.38    0.53
   3   4   8    1.39    0.57
  -3  -4   8    1.73    0.57
  -4   4   8    4.31    0.90
   4  -4   8    3.36    0.76
  -4  -4   8    2.30    0.72
   4   4   8    4.00    0.96
  -4   4   8    4.31    0.63
   4   4   8    3.03    0.60
  -4  -4   8    3.93    0.67
   5  -4   8    1.42    0.69
  -5  -4   8    0.23    0.66
   5   4   8    0.79    0.95
   5   4   8    0.60    0.54
  -5  -4   8    1.01    0.59
  -5   4   8    1.77    0.76
  -6   4   8   35.51    1.66
   6  -4   8   31.89    1.47
  -6  -4   8   29.93    1.39
   6   4   8   29.27    1.61
   6   4   8   30.59    1.26
  -6  -4   8   30.19    1.28
   7  -4   8    3.56    0.74
  -7  -4   8    3.22    0.74
   7   4   8    4.27    1.01
   7   4   8    3.44    0.66
  -7   4   8    3.75    0.90
  -7  -4   8    3.30    0.65
   8  -4   8    0.61    0.64
  -8  -4   8    0.59    0.66
   8   4   8    0.08    0.60
  -8   4   8    1.03    0.77
   8   4   8   -0.28    0.92
  -8  -4   8    0.42    0.61
   9  -4   8    0.41    0.68
  -9   4   8    1.30    0.77
   9   4   8    0.43    0.60
   9   4   8    0.11    0.94
  -9  -4   8    1.00    0.62
  10  -4   8    0.56    0.68
 -10   4   8    0.91    0.79
  10   4   8   -0.02    0.66
  10   4   8   -0.24    0.98
 -10  -4   8    0.18    0.62
  11  -4   8    9.85    1.00
  11   4   8    7.31    0.86
 -11  -4   8    6.06    0.82
 -11   4   8    8.43    1.06
 -12  -4   8    1.28    0.71
  12  -4   8    1.95    0.76
 -12   4   8    2.66    0.91
  12   4   8    1.27    0.66
 -13  -4   8    0.70    0.73
  13  -4   8    1.34    0.74
 -13   4   8    0.87    0.88
  13   4   8    1.20    0.72
 -14  -4   8    0.53    0.72
  14  -4   8    0.72    0.70
 -14   4   8    0.47    0.89
  14   4   8    0.29    0.69
 -15  -4   8    0.89    0.75
  15  -4   8    0.55    0.79
 -15   4   8   -0.01    0.91
  15   4   8    0.90    0.71
 -16  -4   8    5.77    0.91
  16  -4   8    5.41    0.92
 -16   4   8    4.88    1.03
  16   4   8    4.87    0.86
  17  -4   8    7.69    0.98
 -17   4   8    7.76    1.12
  17   4   8    6.98    0.92
 -17  -4   8    8.96    1.06
  18  -4   8   15.43    1.27
  18   4   8   14.46    1.16
 -18  -4   8   13.59    1.22
 -18   4   8   15.59    1.34
 -19  -4   8    1.98    0.87
 -19   4   8    2.47    0.97
  19  -4   8    2.14    0.82
  19   4   8    1.02    0.77
 -20   4   8   -0.01    0.98
  20  -4   8   -0.02    0.86
  20   4   8    0.43    0.79
  21  -4   8   -0.20    0.82
   0   4   9    0.12    0.87
   0  -4   9    0.00    0.75
   0   4   9    0.14    0.59
   1  -4   9    6.61    0.93
   1   4   9    6.03    1.00
  -1  -4   9    4.48    0.87
  -1   4   9    6.13    0.73
   1   4   9    5.72    0.74
  -1  -4   9    4.99    0.73
  -1   4   9    4.98    0.99
   2   4   9    1.75    0.87
   2  -4   9    1.24    0.72
  -2  -4   9    0.74    0.70
  -2   4   9    0.74    0.52
   2   4   9    0.58    0.60
  -2  -4   9    0.62    0.59
  -2   4   9    0.45    0.82
   3   4   9    4.61    0.97
   3  -4   9    4.20    0.83
  -3  -4   9    5.07    0.84
  -3  -4   9    5.99    0.79
  -3   4   9    4.54    0.68
   3   4   9    4.72    0.72
  -3   4   9    4.92    1.00
   4   4   9    1.12    0.93
   4  -4   9    1.66    0.78
  -4  -4   9    0.72    0.73
  -4   4   9    1.47    0.58
   4   4   9    0.59    0.62
  -4   4   9    0.55    0.82
  -4  -4   9    0.46    0.60
   5   4   9   23.38    1.52
  -5  -4   9   21.07    1.29
   5  -4   9   20.95    1.30
   5   4   9   21.49    1.16
  -5  -4   9   20.22    1.16
  -5   4   9   22.93    1.46
   6   4   9    0.94    0.98
  -6  -4   9    0.39    0.74
   6  -4   9    1.53    0.79
  -6   4   9    0.84    0.81
   6   4   9    0.86    0.63
  -6  -4   9    0.79    0.64
   7  -4   9    6.79    0.91
   7   4   9    5.82    1.08
  -7  -4   9    4.06    0.82
   7   4   9    5.71    0.79
  -7  -4   9    5.92    0.79
  -7   4   9    7.57    1.07
   8  -4   9    4.38    0.87
   8   4   9    2.16    0.97
  -8   4   9    3.45    0.91
   8   4   9    3.02    0.75
  -8  -4   9    3.16    0.71
   9  -4   9   -0.09    0.80
  -9   4   9    0.25    0.90
   9   4   9    0.30    0.69
  -9  -4   9    0.11    0.67
  10  -4   9    1.61    0.80
 -10   4   9    0.01    0.92
  10   4   9    1.14    0.71
 -10  -4   9    0.64    0.66
  11  -4   9    1.45    0.73
 -11   4   9    1.74    0.86
  11   4   9    0.61    0.70
 -11  -4   9    1.46    0.69
  12  -4   9    1.27    0.77
 -12   4   9    0.64    0.85
  12   4   9    1.27    0.78
 -12  -4   9    2.02    0.72
  13  -4   9    5.18    0.92
 -13   4   9    5.42    1.06
  13   4   9    4.89    0.86
 -13  -4   9    4.72    0.85
  14  -4   9    0.05    0.81
 -14   4   9   -0.07    0.96
  14   4   9    0.27    0.76
 -14  -4   9   -0.24    0.79
  15  -4   9   12.12    1.19
  15   4   9   13.25    1.14
 -15  -4   9   12.30    1.12
 -15   4   9   13.15    1.27
 -16  -4   9    0.00    0.81
 -16   4   9    0.63    0.90
  16  -4   9    0.35    0.87
  16   4   9    0.12    0.80
 -17  -4   9    0.73    0.85
 -17   4   9    0.74    0.91
  17  -4   9    1.18    0.82
  17   4   9    0.79    0.79
  18  -4   9    0.00    0.81
  18   4   9    0.85    0.83
  19   4   9    3.85    0.92
  20   4   9    2.43    0.89
   0  -4  10    0.09    0.79
   0   4  10    0.00    0.68
   0   4  10    0.55    0.94
   1   4  10   12.92    1.29
  -1  -4  10   11.54    1.15
   1  -4  10   11.99    1.14
  -1   4  10   12.40    0.98
   1   4  10   11.48    0.97
  -1   4  10   11.50    1.25
  -2  -4  10    0.09    0.81
   2  -4  10    0.14    0.82
  -2   4  10   -0.21    0.64
   2   4  10   -0.41    0.67
  -2   4  10   -0.27    0.90
   2   4  10   -0.01    0.95
  -2  -4  10    0.04    0.65
  -3  -4  10    1.72    0.83
   3  -4  10    2.07    0.86
  -3   4  10    1.78    0.93
  -3   4  10    1.43    0.65
   3   4  10    1.06    0.68
  -3  -4  10    2.11    0.71
   3   4  10    1.31    0.97
   4   4  10    9.72    1.20
  -4  -4  10    8.88    1.05
   4  -4  10    7.78    1.07
  -4   4  10    7.64    0.84
   4   4  10    9.03    0.93
  -4  -4  10    8.33    0.88
  -4   4  10   10.13    1.20
  -5  -4  10   -0.26    0.80
   5  -4  10    0.06    0.79
  -5   4  10   -0.40    0.93
   5   4  10    0.21    0.68
  -5  -4  10    0.55    0.69
   5   4  10    0.50    0.93
   6   4  10   66.80    2.29
  -6  -4  10   62.53    2.10
   6  -4  10   69.65    2.31
   6   4  10   63.35    1.93
  -6  -4  10   70.28    2.01
  -6   4  10   71.19    2.39
   7  -4  10   -0.08    0.82
  -7   4  10    0.41    0.96
   7   4  10   -0.36    0.75
  -7  -4  10    0.39    0.69
   8  -4  10    0.62    0.84
  -8   4  10    0.71    0.87
   8   4  10    0.05    0.75
  -8  -4  10    1.25    0.67
   9  -4  10    1.52    0.81
  -9   4  10    0.36    0.96
   9   4  10    0.80    0.73
  -9  -4  10    0.94    0.66
  10  -4  10    1.32    0.90
 -10   4  10    0.23    0.90
  10   4  10   -0.54    0.72
 -10  -4  10    0.54    0.71
  11  -4  10   26.90    1.60
  11   4  10   25.40    1.39
 -11  -4  10   26.65    1.40
 -11   4  10   28.76    1.71
  12  -4  10   -0.05    0.87
 -12   4  10   -0.36    0.90
  12   4  10   -0.14    0.81
 -12  -4  10   -0.24    0.74
  13  -4  10   -0.41    0.84
 -13   4  10    0.18    0.97
  13   4  10   -0.15    0.80
 -13  -4  10    0.07    0.73
 -14   4  10    0.08    1.03
  14  -4  10   -0.11    0.85
  14   4  10   -0.01    0.80
 -14  -4  10    0.17    0.81
  15  -4  10    0.36    0.87
  15   4  10   -0.31    0.80
  16   4  10   15.54    1.26
  17   4  10    0.19    0.85
   0  -4  11    0.09    0.88
   0   4  11    0.41    1.00
   0   4  11   -0.05    0.70
  -1  -4  11    2.04    0.96
   1  -4  11    1.86    0.87
  -1   4  11    2.79    1.04
   1   4  11    1.74    0.94
  -1   4  11    2.74    0.77
   1   4  11    1.47    0.71
  -2  -4  11    0.00    0.88
   2  -4  11    0.01    0.87
  -2   4  11    0.40    1.02
   2   4  11    0.86    0.98
  -2   4  11   -0.06    0.70
   2   4  11    0.39    0.70
  -3  -4  11    0.52    0.86
   3  -4  11    0.99    0.85
  -3   4  11    0.77    0.98
   3   4  11    0.02    0.99
  -3   4  11    0.49    0.68
   3   4  11    0.37    0.74
  -3  -4  11    0.89    0.69
  -4  -4  11    4.44    1.00
   4  -4  11    5.04    1.05
  -4   4  11    4.42    1.06
  -4   4  11    4.51    0.80
   4   4  11    3.83    1.05
   4   4  11    4.89    0.86
  -4  -4  11    3.91    0.77
  -5  -4  11    3.87    0.95
   5  -4  11    4.47    1.03
  -5   4  11    5.34    1.08
   5   4  11    3.25    0.82
  -5  -4  11    4.86    0.82
   6  -4  11    2.88    0.92
  -6   4  11    2.77    0.99
   6   4  11    1.37    0.78
  -6  -4  11    2.26    0.77
   7  -4  11    1.17    0.90
  -7   4  11    0.73    1.01
   7   4  11    0.71    0.78
  -7  -4  11    1.13    0.74
   8  -4  11    0.77    0.90
  -8   4  11    0.87    0.98
   8   4  11    0.30    0.79
  -8  -4  11    0.60    0.75
   9  -4  11    0.53    0.90
  -9   4  11    0.36    0.96
   9   4  11    0.62    0.80
  -9  -4  11    1.65    0.77
  10  -4  11    2.72    0.93
 -10   4  11    2.54    1.09
  10   4  11    3.14    0.87
 -10  -4  11    2.93    0.79
  11  -4  11   -0.07    0.91
 -11   4  11   -0.35    0.96
  11   4  11   -0.03    0.83
 -11  -4  11    0.41    0.73
  12   4  11    5.07    0.96
  13   4  11    3.78    0.94
  14   4  11    1.75    0.85
   0  -4  12    0.07    0.95
   0   4  12    0.44    1.04
   0   4  12    0.41    0.78
  -1  -4  12    1.29    0.99
   1  -4  12    1.44    0.95
  -1   4  12    1.84    1.07
   1   4  12    1.62    1.04
  -1   4  12    1.81    0.78
   1   4  12    1.47    0.76
  -2  -4  12    1.41    0.97
   2  -4  12    1.05    0.93
  -2   4  12    0.35    1.03
   2   4  12    0.88    1.03
  -2   4  12    1.04    0.76
   2   4  12    1.15    0.76
  -3  -4  12    0.59    0.92
   3  -4  12    0.29    0.96
  -3   4  12    0.03    1.02
  -3   4  12    0.81    0.74
   3   4  12   -0.48    0.77
  -4  -4  12   -0.08    0.97
   4  -4  12   -0.39    0.96
  -4   4  12    0.46    0.98
  -4   4  12    0.49    0.77
  -4  -4  12    0.46    0.70
   4   4  12    0.26    0.79
   5  -4  12    1.41    0.95
  -5   4  12    1.10    1.06
   5   4  12    0.75    0.79
  -5  -4  12    1.13    0.72
   6  -4  12    6.20    1.15
  -6   4  12    4.07    1.12
   6   4  12    4.55    0.90
  -7   4  12    1.05    1.06
   7   4  12    1.72    0.83
   8   4  12    0.40    0.80
   9   4  12    2.06    0.83
  10   4  12    0.64    0.79
  -1  -4  13    1.43    1.05
  -1   4  13    1.23    1.05
  -2  -4  13    1.10    1.01
  -2   4  13    0.18    1.09
  -3  -4  13    0.48    1.04
  -3   4  13   -0.04    1.09
   0  -5   0    0.29    0.71
   1  -5   0    0.46    0.71
  -1  -5   0    0.50    0.70
   2  -5   0    0.62    0.72
  -2  -5   0    0.82    0.79
   3  -5   0   -0.06    0.68
  -3  -5   0    0.23    0.79
   4  -5   0    0.84    0.67
  -4  -5   0    0.56    0.73
   5  -5   0    0.39    0.72
  -5  -5   0    0.53    0.81
   6  -5   0    0.51    0.73
  -6  -5   0   -0.09    0.78
  -6   5   0    0.65    0.89
  -7   5   0    0.95    0.83
   7  -5   0   -0.06    0.71
  -7  -5   0   -0.26    0.77
   8  -5   0    3.67    0.84
  -8  -5   0    4.70    0.88
  -8   5   0    4.62    0.93
  -9   5   0   -0.31    0.85
   9  -5   0    0.10    0.68
  -9  -5   0   -0.40    0.79
  10  -5   0    4.56    0.82
 -10  -5   0    4.21    0.88
 -10   5   0    5.78    0.95
 -11   5   0    0.98    0.83
  11  -5   0    0.11    0.70
 -11  -5   0    0.37    0.80
 -12   5   0    0.72    0.86
  12  -5   0    0.75    0.65
 -12  -5   0    0.31    0.84
  13  -5   0    0.36    0.66
 -13  -5   0    0.77    0.83
 -13   5   0    0.03    0.86
  14  -5   0    2.20    0.71
 -14  -5   0    1.44    0.85
 -14   5   0    1.04    0.83
  15  -5   0    0.74    0.67
 -15   5   0   -0.49    0.81
 -16   5   0    0.43    0.84
  16  -5   0    0.94    0.70
 -17   5   0    0.02    0.76
  17  -5   0   -0.11    0.69
  18  -5   0    0.38    0.72
  19  -5   0    0.46    0.72
  20  -5   0    3.54    0.81
   0  -5   1    6.94    0.91
   0  -5  -1    7.96    0.93
   1  -5   1    9.85    0.95
  -1  -5   1   10.68    1.04
   1  -5  -1   10.94    1.01
  -1  -5  -1   11.07    1.02
   2  -5   1    2.82    0.76
  -2  -5   1    2.10    0.81
   2  -5  -1    2.14    0.71
  -2  -5  -1    1.62    0.81
  -2  -5   1    1.96    0.51
   3  -5   1    0.38    0.69
  -3  -5   1    0.22    0.74
   3  -5  -1    0.83    0.70
  -3  -5  -1    0.99    0.77
  -3  -5   1    0.27    0.48
   4  -5   1   -0.05    0.67
  -4  -5   1    0.49    0.82
   4  -5  -1   -0.09    0.77
  -4  -5  -1    0.58    0.74
  -4   5   1    0.67    0.85
  -4  -5   1    0.13    0.49
   5  -5   1    0.51    0.67
  -5  -5   1    0.18    0.79
   5  -5  -1    0.81    0.72
  -5   5   1    1.66    0.88
  -5  -5  -1    0.82    0.81
  -5  -5   1    0.46    0.48
   6  -5   1   69.78    2.01
  -6  -5   1   74.26    2.18
   6  -5  -1   66.28    1.97
  -6  -5  -1   68.36    2.10
  -6   5   1   67.84    2.14
  -6  -5   1   67.82    1.65
  -7   5   1    5.10    0.95
   7  -5   1    4.16    0.83
  -7  -5   1    5.91    0.97
   7  -5  -1    4.26    0.86
  -7  -5  -1    4.32    0.86
  -7  -5   1    3.65    0.60
   8  -5   1    0.74    0.64
   8  -5  -1   -0.06    0.68
  -8  -5   1    0.37    0.83
  -8  -5  -1    0.99    0.85
  -8   5  -1    0.25    0.82
  -8   5   1    1.05    0.88
  -8  -5   1    0.50    0.52
  -9  -5   1    2.48    0.62
   9  -5   1    3.67    0.78
   9  -5  -1    2.59    0.76
  -9  -5   1    3.30    0.90
  -9   5   1    2.62    0.88
  -9  -5  -1    3.51    0.90
  -9   5  -1    2.90    0.87
 -10  -5   1    0.38    0.60
 -10   5  -1    0.57    0.86
 -10   5   1    1.58    0.85
  10  -5   1    0.71    0.64
  10  -5  -1    0.53    0.73
 -10  -5   1    0.39    0.82
 -10  -5  -1    0.32    0.83
 -11   5   1   31.23    1.56
  11  -5   1   31.74    1.42
  11  -5  -1   29.38    1.39
 -11  -5   1   30.55    1.55
 -11   5  -1   28.29    1.46
 -11  -5  -1   27.74    1.49
 -11  -5   1   28.49    1.28
 -12  -5   1    0.25    0.62
 -12   5  -1    1.11    0.82
  12  -5   1    0.74    0.67
  12  -5  -1    0.66    0.71
 -12  -5   1    0.29    0.84
 -12  -5  -1    0.42    0.83
 -12   5   1    0.53    0.86
 -13  -5   1   -0.17    0.66
 -13   5  -1    0.08    0.83
  13  -5   1    0.43    0.66
  13  -5  -1   -0.05    0.73
 -13  -5   1    0.25    0.83
 -13  -5  -1    1.01    0.86
 -13   5   1    0.75    0.85
 -14  -5   1    3.83    0.81
  14  -5   1    4.89    0.79
 -14   5   1    4.18    0.93
  14  -5  -1    5.50    0.83
 -14  -5  -1    4.14    0.92
 -14   5  -1    5.72    0.93
 -15  -5   1    4.76    0.84
 -15   5   1    4.62    0.95
  15  -5   1    4.73    0.82
  15  -5  -1    5.77    0.82
 -15   5  -1    4.19    0.88
 -16   5   1   29.97    1.48
  16  -5   1   30.33    1.43
  16  -5  -1   30.14    1.40
 -16  -5   1   27.57    1.45
 -17  -5   1    3.17    0.85
 -17   5   1    2.31    0.85
  17  -5   1    2.55    0.76
  17  -5  -1    3.46    0.78
 -18  -5   1    4.08    0.92
  18  -5   1    3.08    0.78
  18  -5  -1    4.28    0.80
 -18   5   1    4.53    0.89
 -19  -5   1    5.04    0.98
  19  -5   1    3.82    0.83
  19  -5  -1    5.13    0.84
 -19   5   1    6.37    0.94
 -20  -5   1    1.01    0.91
  20  -5   1    1.69    0.76
 -21  -5   1    0.17    0.92
 -22  -5   1    4.05    1.04
   0  -5   2    0.24    0.75
   0  -5  -2    0.38    0.81
   0  -5   2    0.59    0.47
   1  -5   2    0.35    0.72
  -1  -5   2    0.21    0.75
   1  -5  -2    0.17    0.81
  -1  -5  -2    1.75    0.85
  -1  -5   2    0.03    0.49
  -2   5   2    1.17    0.92
   2  -5   2   -0.20    0.69
  -2  -5   2    0.33    0.72
   2  -5  -2    0.29    0.78
  -2  -5  -2    0.39    0.79
  -2  -5   2    0.10    0.50
   3  -5   2    0.05    0.65
  -3   5   2    0.24    0.95
  -3  -5   2    0.69    0.79
   3  -5  -2    0.19    0.74
  -3  -5  -2    0.41    0.75
  -3  -5   2    0.05    0.47
   4  -5   2    0.57    0.61
  -4  -5   2   -0.16    0.76
   4  -5  -2    0.09    0.71
  -4  -5  -2    0.23    0.82
  -4   5   2    0.05    0.93
  -4  -5   2    0.12    0.52
   5  -5   2    6.12    0.80
   5  -5  -2    7.23    0.96
  -5  -5  -2    7.09    0.95
  -5   5   2    6.80    1.05
  -5  -5   2    5.90    0.93
  -5  -5   2    6.78    0.71
   6  -5   2    4.92    0.76
  -6  -5   2    4.07    0.89
   6  -5  -2    3.32    0.79
  -6  -5  -2    3.61    0.90
  -6   5   2    4.30    0.94
  -6  -5   2    4.12    0.62
   7  -5   2    1.13    0.69
  -7  -5   2    0.53    0.85
   7  -5  -2    0.20    0.76
  -7  -5  -2    0.41    0.81
  -7   5   2    1.17    0.92
  -7  -5   2   -0.32    0.53
   8  -5   2   10.25    0.96
  -8   5   2    8.82    1.07
  -8  -5   2    8.89    1.06
   8  -5  -2    7.79    0.90
  -8  -5  -2    9.98    1.08
  -8  -5   2    9.86    0.83
  -9   5   2    0.46    0.87
   9  -5   2    0.60    0.62
  -9  -5   2    0.06    0.84
   9  -5  -2    0.02    0.75
  -9  -5  -2    0.26    0.86
  -9   5  -2    0.37    0.83
  -9  -5   2    0.31    0.60
 -10   5   2    9.89    1.12
  10  -5   2    9.75    0.97
 -10  -5   2    8.61    1.04
  10  -5  -2    8.85    0.98
 -10  -5  -2   10.87    1.13
 -10   5  -2   10.20    1.05
 -10  -5   2    9.05    0.85
 -11  -5   2    0.38    0.65
 -11   5  -2    0.89    0.80
  11  -5   2   -0.32    0.66
 -11  -5   2    0.35    0.87
  11  -5  -2    0.40    0.72
 -11  -5  -2    0.41    0.88
 -11   5   2   -0.19    0.89
 -12  -5   2    0.24    0.62
  12  -5   2    0.55    0.68
 -12  -5   2   -0.05    0.86
  12  -5  -2    0.09    0.74
 -12  -5  -2    0.32    0.87
 -12   5   2    0.19    0.85
 -12   5  -2    0.44    0.81
 -13  -5   2    0.54    0.67
 -13   5  -2    1.24    0.82
  13  -5   2    1.02    0.72
 -13   5   2    1.02    0.91
  13  -5  -2    1.06    0.70
 -13  -5  -2    1.13    0.86
 -14  -5   2    0.19    0.72
 -14   5  -2    0.06    0.81
 -14   5   2   -0.28    0.91
  14  -5   2    0.19    0.71
  14  -5  -2    0.46    0.72
 -14  -5  -2    0.81    0.84
 -15  -5   2    1.52    0.76
 -15   5   2    1.40    0.81
  15  -5   2    1.40    0.71
  15  -5  -2    1.80    0.75
 -15  -5  -2    1.80    0.85
 -16  -5   2    1.75    0.81
 -16   5   2    2.57    0.87
  16  -5   2    1.60    0.74
  16  -5  -2    1.52    0.77
 -17   5   2   12.96    1.16
  17  -5   2   14.02    1.12
  17  -5  -2   15.20    1.10
 -17  -5   2   13.68    1.22
 -18  -5   2    0.07    0.85
  18  -5   2    0.27    0.76
  18  -5  -2    0.73    0.71
 -18   5   2    0.34    0.85
 -19  -5   2    0.00    0.88
  19  -5   2   -0.19    0.74
 -19   5   2    0.00    0.85
 -20  -5   2    0.96    0.92
  20  -5   2    0.55    0.75
 -20   5   2    1.05    0.83
 -21  -5   2    0.35    0.93
  21  -5   2   -0.51    0.76
 -22  -5   2    6.30    1.11
   0  -5   3   14.63    1.10
   0  -5  -3   14.17    1.21
   0   5   3   12.51    1.23
   0  -5   3   12.75    0.86
   1  -5   3   20.74    1.25
  -1  -5   3   19.80    1.22
   1  -5  -3   22.37    1.39
  -1  -5  -3   20.00    1.35
  -1   5   3   18.10    1.34
   1   5   3   18.99    1.41
  -1  -5   3   19.36    0.99
   2  -5   3    0.58    0.67
  -2  -5   3    0.15    0.73
   2  -5  -3    0.50    0.84
  -2   5   3    0.54    0.85
  -2  -5   3    0.37    0.54
   3  -5   3    8.40    0.90
  -3  -5   3    8.34    0.98
   3  -5  -3    8.33    0.98
  -3   5   3    8.43    1.07
  -3  -5   3    8.70    0.77
   4  -5   3    8.30    0.89
  -4  -5   3    6.46    0.88
   4  -5  -3    6.01    0.93
  -4  -5   3    6.72    0.73
  -4   5   3    5.32    0.99
   5  -5   3   39.42    1.57
  -5  -5   3   43.53    1.74
  -5   5   3   40.14    1.79
   5  -5  -3   40.18    1.68
  -5  -5   3   40.09    1.39
   6  -5   3   78.58    2.13
  -6  -5   3   80.30    2.29
  -6   5   3   81.95    2.41
   6  -5  -3   78.36    2.19
  -6  -5   3   78.81    1.89
  -7   5   3    0.03    0.93
   7  -5   3    0.75    0.65
  -7  -5   3    0.16    0.74
   7  -5  -3    0.26    0.80
  -7  -5   3    0.68    0.59
   8  -5   3    0.26    0.72
  -8  -5   3    0.49    0.77
   8  -5  -3    0.47    0.71
  -8  -5   3    0.42    0.58
  -8   5   3    0.57    0.87
   9  -5   3    5.08    0.81
  -9  -5   3    4.69    0.87
   9  -5  -3    4.03    0.82
  -9   5   3    5.03    1.02
  -9  -5   3    4.26    0.73
 -10  -5   3    3.00    0.71
 -10   5  -3    3.43    0.88
  10  -5   3    2.57    0.70
 -10  -5   3    2.74    0.83
  10  -5  -3    2.22    0.80
 -10   5   3    2.91    0.93
 -11  -5   3    5.09    0.79
  11  -5   3    6.25    0.87
 -11  -5   3    5.37    0.90
  11  -5  -3    5.21    0.88
 -11   5   3    6.59    1.02
 -11   5  -3    6.43    0.94
 -12  -5   3    4.82    0.83
 -12   5  -3    4.72    0.87
 -12   5   3    4.31    1.03
  12  -5   3    4.28    0.81
  12  -5  -3    5.84    0.90
 -13   5   3    9.47    1.10
  13  -5   3    9.55    1.00
  13  -5  -3    8.99    0.99
 -13  -5   3    9.26    0.96
 -14  -5   3    0.39    0.73
 -14   5   3   -0.17    0.85
  14  -5   3    0.09    0.74
  14  -5  -3    0.21    0.76
 -15  -5   3    1.51    0.76
 -15   5   3    3.50    0.90
  15  -5   3    2.47    0.77
  15  -5  -3    1.87    0.80
 -16   5   3   25.71    1.46
  16  -5   3   25.88    1.39
  16  -5  -3   25.88    1.35
 -16  -5   3   24.80    1.48
 -17   5   3   16.96    1.29
  17  -5   3   16.46    1.21
  17  -5  -3   15.73    1.15
 -17  -5   3   16.01    1.28
  18  -5   3   15.03    1.18
  18  -5  -3   13.93    1.09
 -18  -5   3   12.79    1.24
 -18   5   3   15.65    1.24
 -19  -5   3    0.73    0.88
  19  -5   3    0.50    0.80
 -19   5   3    0.05    0.83
 -20  -5   3    2.55    0.97
  20  -5   3    2.46    0.83
 -20   5   3    2.60    0.87
 -21  -5   3   -0.07    0.97
  21  -5   3    1.05    0.75
 -21   5   3    0.72    0.88
  22  -5   3   13.28    1.13
   0   5   4    1.12    0.97
   0  -5   4    0.54    0.74
   0  -5   4    0.15    0.54
  -1   5   4    4.02    1.03
   1  -5   4    3.23    0.77
  -1  -5   4    2.79    0.75
   1   5   4    4.82    0.99
  -1  -5   4    2.51    0.61
   2   5   4    0.84    0.92
   2  -5   4    0.43    0.73
  -2  -5   4    0.40    0.76
  -2   5   4    0.92    0.89
  -2  -5   4    0.50    0.55
   3  -5   4    9.80    1.00
  -3  -5   4    9.40    0.99
  -3   5   4    9.27    1.11
   3  -5  -4    9.28    1.07
   3   5   4    9.83    1.19
  -3  -5   4    9.44    0.83
   4   5   4    3.03    0.95
  -4   5   4    1.30    0.89
   4  -5   4    1.19    0.68
  -4  -5   4    1.35    0.77
   4  -5  -4    1.08    0.87
  -4  -5   4    1.61    0.59
   5  -5   4   15.11    1.11
  -5  -5   4   13.10    1.15
  -5   5   4   11.51    1.19
   5  -5  -4   12.49    1.12
  -5  -5   4   12.09    0.91
   6  -5   4    0.73    0.66
  -6  -5   4    0.59    0.78
   6  -5  -4    0.38    0.85
  -6  -5   4    0.63    0.58
  -6   5   4    0.42    0.90
   7  -5   4    3.38    0.75
  -7  -5   4    2.75    0.83
   7  -5  -4    3.63    0.86
  -7   5   4    3.04    0.98
  -7  -5   4    2.97    0.68
   8  -5   4    0.78    0.67
  -8  -5   4   -0.58    0.77
   8  -5  -4    0.67    0.80
  -8   5   4    0.25    0.98
  -8  -5   4    0.23    0.63
   9  -5   4    0.64    0.75
  -9  -5   4   -0.07    0.79
   9  -5  -4    1.03    0.81
  -9   5   4   -0.29    1.01
  -9  -5   4    0.11    0.64
  10  -5   4    0.33    0.72
 -10   5   4   -0.21    0.91
 -10  -5   4    0.08    0.80
  10  -5  -4    0.27    0.79
 -10  -5   4    0.06    0.66
 -11  -5   4    1.71    0.71
 -11   5   4    1.26    0.90
  11  -5   4    1.43    0.72
  11  -5  -4    2.11    0.77
 -12  -5   4    0.78    0.72
 -12   5   4    1.03    0.93
  12  -5   4    0.54    0.77
  12  -5  -4    0.63    0.77
 -13   5   4    9.86    1.10
  13  -5   4   10.22    1.01
  13  -5  -4   10.17    1.01
 -13  -5   4   10.48    1.02
 -14  -5   4    1.24    0.78
 -14   5   4    3.16    0.89
  14  -5   4    2.78    0.84
  14  -5  -4    2.15    0.79
 -15  -5   4    3.83    0.87
  15  -5   4    4.80    0.84
  15  -5  -4    4.51    0.90
 -15   5   4    5.10    1.01
 -16   5   4    9.55    1.10
  16  -5   4    8.11    0.99
  16  -5  -4    9.49    1.00
 -16  -5   4    9.85    1.09
 -17  -5   4   -0.30    0.86
  17  -5   4    0.55    0.82
  17  -5  -4   -0.31    0.77
 -17   5   4    0.04    0.94
 -18  -5   4    0.79    0.83
  18  -5   4    0.54    0.79
 -18   5   4    0.92    0.88
 -19  -5   4    0.24    0.91
  19  -5   4    1.13    0.75
 -19   5   4    1.42    0.90
 -20  -5   4    0.81    0.88
  20  -5   4    0.79    0.75
 -20   5   4    0.25    0.90
   0  -5   5   16.05    1.19
   0   5   5   17.18    1.38
  -1   5   5    3.85    1.08
   1  -5   5    3.30    0.86
  -1  -5   5    3.34    0.88
   1   5   5    4.21    1.09
  -1  -5   5    4.07    0.69
  -2   5   5    2.57    1.05
   2  -5   5    2.26    0.76
  -2  -5   5    1.99    0.75
  -2  -5   5    3.29    0.68
   2   5   5    2.38    0.98
  -3   5   5    0.32    0.95
   3   5   5    0.49    0.99
   3  -5   5    0.61    0.76
  -3  -5   5    0.16    0.75
  -3  -5   5    0.24    0.60
   4  -5   5    3.85    0.85
  -4  -5   5    3.38    0.87
   4   5   5    3.22    1.01
  -4  -5   5    3.56    0.69
  -4   5   5    3.94    1.00
   5  -5   5    2.88    0.79
  -5  -5   5    1.59    0.80
   5   5   5    4.37    1.11
  -5   5   5    1.91    0.94
  -5  -5   5    2.38    0.67
   6   5   5    1.45    1.01
   6  -5   5   -0.04    0.71
  -6  -5   5    0.68    0.77
   6  -5  -5    0.60    0.89
  -6   5   5   -0.02    0.97
  -6  -5   5    0.96    0.62
   7  -5   5    0.22    0.68
  -7  -5   5    0.24    0.82
  -7   5   5   -0.21    0.98
   7  -5  -5    0.85    0.80
   7   5   5    1.71    1.02
  -7  -5   5    0.11    0.65
   8   5   5    2.03    0.99
   8  -5   5    0.39    0.69
  -8  -5   5   -0.24    0.83
  -8   5   5   -0.28    0.97
   8  -5  -5    0.61    0.86
  -8  -5   5    0.13    0.64
  -9   5   5    0.57    0.95
   9  -5   5    1.16    0.72
  -9  -5   5    0.61    0.81
   9   5   5    2.14    1.01
   9  -5  -5    1.60    0.85
  -9  -5   5    0.63    0.68
 -10   5   5    1.00    0.92
  10  -5   5    1.21    0.78
 -10  -5   5    1.38    0.81
  10  -5  -5    2.15    0.86
 -10  -5   5    1.12    0.71
 -11   5   5    8.84    1.09
  11  -5   5    8.28    1.00
  11  -5  -5    8.00    0.99
 -11  -5   5    8.46    0.97
 -12   5   5    1.21    0.90
  12  -5   5    1.02    0.74
  12  -5  -5    0.56    0.80
 -12  -5   5    0.81    0.77
 -13  -5   5    0.25    0.82
  13  -5   5   -0.21    0.78
  13  -5  -5    0.39    0.77
 -13   5   5    0.36    0.94
 -14  -5   5    4.56    0.91
  14  -5   5    3.73    0.86
  14  -5  -5    3.82    0.89
 -14   5   5    4.07    0.94
 -15  -5   5    0.25    0.81
  15  -5   5    0.36    0.76
  15  -5  -5   -0.34    0.79
 -15   5   5    0.60    0.86
 -16  -5   5    1.61    0.84
  16  -5   5    2.30    0.80
  16  -5  -5    0.79    0.77
 -16   5   5    1.31    0.93
 -17  -5   5    1.40    0.84
  17  -5   5    1.93    0.78
 -17   5   5    1.52    0.89
 -18  -5   5    4.47    1.02
  18  -5   5    4.48    0.87
 -18   5   5    3.50    0.96
  19  -5   5    0.23    0.79
 -19   5   5    0.63    0.93
   0   5   6    0.18    1.08
   0  -5   6    0.34    0.82
   1   5   6    3.47    1.08
   1  -5   6    1.91    0.81
  -1  -5   6    2.66    0.84
  -1  -5   6    2.98    0.69
  -1   5   6    3.05    1.04
   2   5   6    1.67    1.10
   2  -5   6    0.31    0.82
  -2  -5   6    0.61    0.77
  -2   5   6    0.72    1.08
  -2  -5   6    0.63    0.61
   3  -5   6    0.95    0.77
  -3  -5   6    0.44    0.83
   3   5   6    0.40    1.04
  -3   5   6    0.16    1.03
  -3  -5   6    0.43    0.64
   4  -5   6    1.10    0.81
  -4  -5   6    0.33    0.80
   4   5   6    1.87    1.06
  -4   5   6   -0.04    0.98
  -4  -5   6    0.94    0.62
   5  -5   6    0.64    0.77
  -5  -5   6    0.76    0.83
  -5   5   6   -0.62    1.06
   5   5   6    0.95    1.08
  -5  -5   6    0.69    0.64
   6  -5   6    3.54    0.82
  -6   5   6    3.36    1.11
  -6  -5   6    2.94    0.91
   6   5   6    3.67    1.12
  -6  -5   6    3.14    0.73
   7   5   6    1.74    1.08
  -7   5   6    1.06    1.04
   7  -5   6    0.84    0.74
  -7  -5   6    0.50    0.84
  -7  -5   6    0.18    0.69
  -8   5   6    9.83    1.21
   8  -5   6    8.78    1.00
  -8  -5   6    7.97    1.08
   8   5   6    8.92    1.26
  -8  -5   6    8.92    0.93
  -9   5   6   -0.01    0.91
   9  -5   6    0.01    0.75
  -9  -5   6    0.26    0.81
   9   5   6    1.11    1.04
   9  -5  -6    0.37    0.93
  -9  -5   6    0.00    0.70
 -10   5   6   12.92    1.25
  10  -5   6   13.79    1.14
  10  -5  -6   14.52    1.23
  10   5   6   15.27    1.44
 -10  -5   6   12.80    1.05
 -11   5   6    9.66    1.16
  11  -5   6    8.03    0.99
  11  -5  -6    9.14    1.10
  11   5   6    9.43    1.29
 -11  -5   6    7.15    0.93
  12   5   6    3.73    1.14
  12  -5   6    2.49    0.80
  12  -5  -6    2.45    0.88
 -12   5   6    1.99    0.94
 -12  -5   6    2.63    0.81
  13   5   6    1.45    1.06
  13  -5   6    0.26    0.81
  13  -5  -6    0.45    0.85
 -13   5   6    0.65    0.96
 -13  -5   6    0.26    0.84
  14  -5   6    7.64    0.95
  14  -5  -6    8.29    1.02
 -14  -5   6    7.44    1.06
 -14   5   6    8.25    1.17
 -15  -5   6    1.58    0.84
  15  -5   6    1.81    0.79
  15  -5  -6    2.26    0.83
 -15   5   6    1.52    0.96
 -16  -5   6    2.71    0.97
  16  -5   6    3.97    0.90
 -16   5   6    4.09    0.99
 -17  -5   6    3.14    0.93
  17  -5   6    2.20    0.84
 -17   5   6    2.38    0.94
   0   5   7   96.56    2.84
   0  -5   7   97.15    2.66
  -1   5   7   11.23    1.38
   1  -5   7   12.83    1.19
  -1  -5   7   11.83    1.19
   1   5   7   11.89    1.40
  -1  -5   7   12.43    1.01
   2  -5   7    2.88    0.94
  -2  -5   7    2.81    0.96
  -2   5   7    1.48    1.02
   2   5   7    3.01    1.10
  -2  -5   7    2.05    0.72
   3  -5   7    0.37    0.83
  -3  -5   7   -0.06    0.89
  -3   5   7   -0.30    1.13
  -3  -5   7    0.24    0.68
   3   5   7    0.06    1.08
   4   5   7    0.88    1.13
  -4   5   7    1.49    1.04
   4  -5   7    0.85    0.87
  -4  -5   7    0.91    0.88
  -4  -5   7    0.70    0.68
   5   5   7    0.68    1.15
  -5   5   7   -0.35    1.13
   5  -5   7    0.13    0.78
  -5  -5   7   -0.24    0.87
  -5  -5   7    0.33    0.69
  -6   5   7    0.82    0.96
   6   5   7    1.00    1.18
   6  -5   7    1.03    0.77
  -6  -5   7    0.50    0.90
  -6  -5   7    0.51    0.72
  -7   5   7    1.10    0.94
   7   5   7    0.22    1.18
   7  -5   7   -0.45    0.82
  -7  -5   7    0.28    0.85
  -7  -5   7   -0.03    0.74
  -8   5   7    2.13    0.97
   8  -5   7    2.27    0.85
  -8  -5   7    2.84    0.91
   8   5   7    3.18    1.18
  -8  -5   7    2.51    0.77
   9  -5   7    1.46    0.83
   9   5   7    2.14    1.12
  -9  -5   7    1.50    0.77
  -9   5   7    2.03    0.98
 -10   5   7   20.73    1.53
  10  -5   7   20.95    1.39
  10   5   7   18.72    1.57
  10  -5  -7   20.83    1.41
 -10  -5   7   16.83    1.23
 -11   5   7   11.37    1.28
  11  -5   7   12.00    1.15
  11   5   7   11.36    1.37
  11  -5  -7   11.78    1.19
 -11  -5   7   10.43    1.08
  12  -5   7   51.17    1.99
  12  -5  -7   53.93    2.00
 -12  -5   7   49.79    1.90
 -12   5   7   52.40    2.15
  13  -5   7    6.25    1.01
  13  -5  -7    4.98    0.99
 -13   5   7    6.35    1.11
 -13  -5   7    5.92    0.96
  14  -5   7    0.32    0.80
  14  -5  -7   -0.34    0.86
 -14   5   7    0.07    0.94
 -14  -5   7    0.64    0.85
 -15  -5   7    0.32    0.87
   0   5   8   -0.34    1.19
   0  -5   8    0.43    0.84
  -1   5   8   10.96    1.40
   1  -5   8   10.35    1.18
  -1  -5   8   10.82    1.15
   1   5   8    8.31    1.32
  -2   5   8    1.01    1.03
   2  -5   8    1.11    0.86
  -2  -5   8    1.15    0.86
   2   5   8    1.05    1.16
  -2  -5   8    1.06    0.74
  -3   5   8    5.81    1.16
   3  -5   8    6.58    0.99
  -3  -5   8    5.74    1.02
   3   5   8    5.47    1.25
  -3  -5   8    6.03    0.86
  -4   5   8    7.89    1.18
   4  -5   8    6.96    1.08
  -4  -5   8    6.29    1.07
   4   5   8    6.02    1.29
  -4  -5   8    5.77    0.88
  -5   5   8    1.04    1.02
   5  -5   8    1.55    0.82
  -5  -5   8    0.89    0.90
   5   5   8    0.52    1.16
  -5  -5   8    1.45    0.76
  -6   5   8    2.80    0.98
   6  -5   8    1.76    0.89
  -6  -5   8    2.62    0.91
   6   5   8    1.63    1.18
  -6  -5   8    2.10    0.74
   7  -5   8    0.24    0.86
  -7  -5   8    0.55    0.86
   7   5   8    0.05    1.19
  -7  -5   8   -0.04    0.71
  -7   5   8    0.26    1.01
   8  -5   8    0.26    0.81
   8   5   8   -0.36    1.20
  -8   5   8    0.93    1.05
  -8  -5   8    0.13    0.71
   9  -5   8    0.30    0.83
  -9   5   8    1.49    0.96
   9   5   8    0.53    1.17
  -9  -5   8    0.06    0.73
  10  -5   8    0.43    0.84
 -10   5   8   -0.14    1.01
 -10  -5   8    0.12    0.78
  10   5   8    0.10    1.24
  11  -5   8   10.37    1.15
 -11  -5   8    8.54    1.01
 -11   5   8    8.81    1.26
  12  -5  -8    1.71    0.97
 -12  -5   8    1.76    0.85
  13  -5  -8    0.24    0.95
   0   5   9   19.61    1.56
   0  -5   9   20.75    1.54
  -1   5   9    1.19    1.03
   1   5   9    0.41    1.04
   1  -5   9    0.28    0.97
  -1  -5   9    0.36    0.94
  -2   5   9    0.43    1.11
   2   5   9   -0.20    1.12
   2  -5   9   -0.11    0.95
  -2  -5   9   -0.20    0.96
   3   5   9   -0.12    1.23
   3  -5   9    0.93    0.90
  -3  -5   9   -0.46    0.95
  -3  -5   9    0.61    0.72
  -3   5   9    1.70    1.01
   4  -5   9    0.23    0.91
  -4  -5   9   -0.02    0.91
  -4  -5   9   -0.02    0.74
  -4   5   9    0.20    1.02
   5  -5   9    0.29    0.89
  -5  -5   9   -0.18    0.91
  -5   5   9    0.92    1.05
  -5  -5   9    0.41    0.75
   6  -5   9    0.74    0.93
  -6  -5   9    0.96    0.90
   6   5   9   -0.51    1.25
  -6   5   9    0.77    1.03
  -6  -5   9    0.93    0.76
   7  -5   9    2.06    0.89
   7   5   9    0.06    1.16
  -7   5   9    1.81    1.08
  -7  -5   9    1.09    0.79
   8  -5   9    0.12    0.95
   8   5   9   -0.35    1.25
  -8   5   9    0.70    1.01
  -8  -5   9    0.34    0.81
   0  -5  10   -0.37    1.00
   0   5  10    0.40    1.10
  -1  -5  10    3.47    1.09
   1  -5  10    3.54    1.06
  -1   5  10    4.78    1.21
   1   5  10    4.16    1.20
  -2  -5  10    0.57    1.03
   2  -5  10    0.74    0.96
  -2   5  10    0.17    1.01
   2   5  10   -0.28    1.12
   3   5  10    0.38    1.10
  -3  -5  10    0.82    0.92
  -3   5  10    1.45    1.02
   4   5  10    1.50    1.13
  -4  -5  10    2.26    0.97
   5   5  10    1.57    1.13
  -5  -5  10    1.41    0.99
   0  -6   0  177.31    3.67
   1  -6   0    0.42    1.05
  -1  -6   0   -0.23    0.99
   2  -6   0    2.05    0.98
  -2  -6   0    2.11    1.07
   3  -6   0    0.47    0.89
  -3  -6   0    0.63    0.97
  -4   6   0    2.04    1.11
   4  -6   0    2.81    0.95
  -4  -6   0    2.48    1.10
  -5   6   0    1.23    1.12
   5  -6   0    0.15    0.91
  -5  -6   0    0.07    1.03
   6  -6   0   -0.23    0.98
  -6  -6   0    1.41    0.99
  -6   6   0    2.01    1.13
  -7   6   0    0.40    1.16
   7  -6   0   -0.23    0.96
  -7  -6   0    0.28    1.05
   8  -6   0   -0.14    0.94
  -8  -6   0    0.81    1.03
  -8   6   0    1.02    1.09
   9  -6   0    0.51    0.82
  -9  -6   0   -0.28    1.03
  -9   6   0    0.62    1.09
 -10   6   0   25.76    1.70
  10  -6   0   25.93    1.53
 -10  -6   0   25.99    1.68
 -11   6   0    0.54    1.08
  11  -6   0    0.26    0.89
 -11  -6   0    0.71    1.08
 -12   6   0   47.19    2.08
  12  -6   0   44.76    1.89
 -12  -6   0   41.58    2.02
 -14   6   0    1.18    1.04
 -15   6   0   -0.40    0.99
   0  -6   1   -0.10    0.96
   1  -6   1    1.58    1.02
  -1  -6   1    1.02    0.97
   1  -6  -1    0.94    1.05
  -1  -6  -1    1.01    0.99
  -2   6   1    1.14    1.12
   2  -6   1   -0.18    0.99
  -2  -6   1   -0.26    1.03
   2  -6  -1    0.22    1.04
  -2  -6  -1    0.60    1.08
  -3   6   1    1.78    1.20
   3  -6   1    0.13    0.88
   3  -6  -1    0.17    1.03
  -3  -6  -1   -0.15    1.01
   4  -6   1   -0.03    0.85
  -4  -6   1   -0.25    0.97
   4  -6  -1    0.01    1.04
  -4  -6  -1   -0.28    1.06
  -4   6   1    2.09    1.21
  -5   6   1    0.46    1.21
  -5   6  -1    1.22    1.20
   5  -6   1    1.03    0.86
  -5  -6   1   -0.32    1.06
   5  -6  -1    0.53    1.02
  -5  -6  -1    0.54    0.99
   6  -6   1    0.54    0.82
  -6  -6   1   -0.01    1.09
   6  -6  -1    0.01    1.01
  -6  -6  -1    0.53    1.01
  -6   6  -1    1.08    1.09
  -6   6   1    0.85    1.15
   7  -6   1    0.76    0.79
  -7  -6   1    0.49    1.08
   7  -6  -1    0.09    0.96
  -7  -6  -1    1.10    1.04
  -7   6   1    0.30    1.16
  -7   6  -1    0.47    1.08
  -8   6  -1    1.38    1.12
   8  -6   1    1.23    0.88
  -8   6   1    0.99    1.07
   8  -6  -1   -0.10    0.90
  -8  -6   1    0.18    1.09
  -8  -6  -1    0.76    1.06
  -9   6   1    0.44    1.09
   9  -6   1    0.24    0.89
   9  -6  -1    0.74    0.96
  -9  -6   1    0.54    1.07
  -9  -6  -1    0.08    1.07
  -9   6  -1    0.63    1.04
 -10   6   1   -0.13    1.15
  10  -6   1    0.75    0.79
  10  -6  -1   -0.03    0.90
 -10  -6   1   -0.44    1.08
 -10  -6  -1    0.52    1.08
 -10   6  -1    0.71    1.08
 -11   6   1   12.33    1.37
  11  -6   1   13.84    1.23
 -11   6  -1   12.76    1.36
  11  -6  -1   11.07    1.19
 -11  -6   1   10.68    1.34
 -11  -6  -1   11.73    1.34
 -12   6  -1    1.48    1.08
  12  -6  -1    0.30    0.85
 -12  -6  -1    0.42    1.03
 -12   6   1    0.44    1.07
 -13  -6  -1    0.91    1.04
 -13   6   1    0.53    1.08
 -13   6  -1   -0.17    1.04
 -14   6   1    0.64    1.04
 -14   6  -1    0.90    0.96
   0  -6   2    8.45    1.14
   0  -6  -2    9.59    1.24
   0   6   2   10.01    1.44
   1   6   2    1.47    1.13
  -1   6   2    2.25    1.14
   1  -6   2    0.95    0.87
  -1  -6   2    0.93    0.98
   1  -6  -2    0.70    0.96
  -1  -6  -2    0.85    1.06
   2  -6   2    0.73    0.92
  -2  -6   2    1.72    0.93
   2  -6  -2    1.14    0.94
  -2  -6  -2    1.06    1.00
  -2   6   2    1.63    1.11
  -3   6   2    1.38    1.22
   3  -6   2    0.98    0.88
  -3  -6   2    1.62    0.89
   3  -6  -2    1.94    0.98
  -3  -6  -2    1.19    1.03
  -4   6   2    0.43    1.23
   4  -6   2    0.38    0.85
  -4  -6   2    0.40    0.97
   4  -6  -2    0.15    0.91
  -4  -6  -2    0.62    1.02
   5  -6   2    8.64    1.09
   5  -6  -2    9.02    1.18
  -5  -6   2    7.79    1.14
  -5  -6  -2    9.02    1.28
  -5   6   2    8.17    1.35
   6  -6   2    0.16    0.85
  -6  -6   2   -0.08    0.94
   6  -6  -2    0.40    0.97
  -6   6   2   -0.23    1.17
  -6  -6  -2    0.27    1.01
  -7   6  -2    2.72    1.11
  -7   6   2    2.56    1.13
   7  -6   2    3.47    0.91
  -7  -6   2    2.97    1.01
   7  -6  -2    3.21    1.04
  -7  -6  -2    1.78    1.04
  -8   6  -2    0.61    1.14
  -8   6   2    0.43    1.20
   8  -6   2   -0.03    0.83
  -8  -6   2    0.53    0.94
   8  -6  -2   -0.13    1.00
  -8  -6  -2   -0.04    1.07
  -9  -6   2    8.73    1.19
   9  -6   2    7.38    1.08
  -9   6  -2    7.43    1.24
   9  -6  -2    7.84    1.13
  -9  -6  -2    7.31    1.23
  -9   6   2    6.22    1.27
  10  -6   2    2.02    0.93
 -10  -6   2    2.88    1.02
  10  -6  -2    2.30    0.97
 -10  -6  -2    3.49    1.11
 -10   6   2    2.37    1.14
 -10   6  -2    2.02    1.11
 -11   6   2   16.63    1.47
  11  -6  -2   14.25    1.29
 -11   6  -2   16.44    1.42
 -11  -6  -2   12.50    1.36
 -12   6  -2    4.80    1.08
  12  -6  -2    4.71    1.00
 -12   6   2    6.08    1.21
 -12  -6  -2    5.37    1.16
 -13  -6  -2    5.29    1.13
   0  -6   3    0.02    0.94
   0  -6  -3   -0.10    1.03
   0   6   3    0.99    1.17
  -1   6   3    3.15    1.22
   1  -6   3    1.80    0.94
  -1  -6   3    1.66    0.93
   1  -6  -3    2.78    1.10
  -1  -6  -3    1.05    1.02
   1   6   3    2.45    1.18
   2   6   3    2.08    1.14
   2  -6   3    1.26    0.89
  -2  -6   3    1.38    0.97
   2  -6  -3    1.68    1.04
  -2  -6  -3    0.64    1.15
  -2   6   3    0.92    1.11
   3  -6   3    0.48    0.94
  -3  -6   3    1.44    0.98
   3  -6  -3    0.76    1.03
  -3  -6  -3    1.10    1.01
  -3   6   3    0.29    1.21
   3   6   3    0.74    1.22
   4  -6   3    1.35    0.89
  -4  -6   3    1.98    0.97
  -4   6   3    2.08    1.22
   4  -6  -3    0.85    1.03
  -4  -6  -3    1.77    1.09
   4   6   3    2.29    1.09
  -5   6   3    0.88    1.15
   5  -6   3    0.12    0.85
  -5  -6   3    0.80    0.93
   5  -6  -3   -0.09    1.01
  -5  -6  -3    0.43    1.07
  -6   6   3    0.63    1.12
   6  -6   3    1.08    0.86
  -6  -6   3    0.68    0.96
   6  -6  -3    0.38    0.98
  -6  -6  -3    1.00    1.10
   7  -6   3    0.02    0.86
  -7  -6   3    0.21    0.98
   7  -6  -3   -0.08    1.07
  -7  -6  -3    0.49    1.05
  -7   6   3    0.33    1.11
  -8   6  -3    0.81    1.08
   8  -6   3    0.65    0.82
  -8  -6   3    0.82    0.97
   8  -6  -3    0.08    0.99
  -8  -6  -3    0.30    1.06
  -8   6   3   -0.22    1.10
  -9   6  -3    0.31    1.12
   9  -6   3    0.73    0.86
  -9  -6   3    1.03    0.98
   9  -6  -3    0.06    0.92
  -9  -6  -3    1.49    1.04
  -9   6   3    0.75    1.09
 -10  -6   3    0.81    0.95
 -10   6  -3    1.72    1.06
  10  -6  -3    1.33    0.98
 -10  -6  -3    0.82    1.00
 -10   6   3    1.83    1.11
  11  -6  -3   -0.42    0.98
 -11  -6  -3    0.00    1.07
 -12  -6  -3    2.00    1.11
 -13  -6  -3    0.74    1.03
 -14  -6  -3    5.27    1.15
   0  -6   4   22.32    1.56
   0   6   4   24.31    1.74
   0  -6  -4   25.88    1.77
   1  -6   4    4.13    0.99
  -1  -6   4    4.06    1.02
   1  -6  -4    4.31    1.17
  -1  -6  -4    5.58    1.21
  -1   6   4    3.08    1.22
   1   6   4    5.47    1.30
   2   6   4    1.43    1.21
   2  -6   4    0.58    0.94
  -2  -6   4    0.69    0.99
  -2   6   4   -0.02    1.23
   2  -6  -4   -0.36    1.09
  -2  -6  -4    1.01    1.13
  -3   6   4    0.38    1.17
   3  -6   4    0.51    0.89
  -3  -6   4    0.72    0.98
   3   6   4    0.99    1.16
   3  -6  -4    0.96    1.06
  -3  -6  -4    0.65    1.08
  -4   6   4   -0.39    1.25
   4  -6   4   -0.24    0.95
  -4  -6   4    0.67    0.97
   4  -6  -4    1.49    1.03
  -4  -6  -4    0.88    1.14
   4   6   4    1.02    1.16
   5  -6   4   23.82    1.57
  -5   6   4   23.59    1.77
  -5  -6   4   25.27    1.67
   5  -6  -4   25.02    1.67
  -5  -6  -4   23.05    1.69
   5   6   4   24.47    1.80
  -6   6   4   22.73    1.72
   6  -6   4   26.25    1.63
  -6  -6   4   24.20    1.63
   6  -6  -4   26.71    1.71
  -6  -6  -4   22.73    1.73
   6   6   4   23.64    1.79
  -7   6   4   11.35    1.41
   7  -6   4   12.11    1.22
  -7  -6   4   13.94    1.40
   7  -6  -4   14.11    1.44
  -7  -6  -4   12.55    1.40
   7   6   4   13.73    1.53
  -8  -6   4   -0.02    1.03
   8  -6  -4    1.07    1.00
  -8  -6  -4    0.40    1.08
   8   6   4    2.23    1.24
  -8  -6   4   -0.03    0.79
  -9  -6   4    1.41    0.99
   9  -6  -4    2.13    1.03
  -9  -6  -4    2.57    1.09
   9   6   4    1.71    1.23
  -9  -6   4    1.49    0.80
 -10  -6  -4    3.03    1.12
 -10  -6   4    2.43    0.84
 -11  -6   4    7.36    1.02
 -12  -6   4    6.01    1.01
   0   6   5   -0.05    1.21
   0  -6   5    0.07    0.97
   0  -6  -5    0.38    1.17
  -1   6   5    7.95    1.39
   1  -6   5    7.53    1.15
  -1  -6   5    6.48    1.16
   1   6   5    6.39    1.36
   1  -6  -5    8.01    1.33
  -1  -6  -5    7.16    1.36
  -2   6   5    3.23    1.27
   2  -6   5    1.81    0.92
  -2  -6   5    2.47    1.06
   2   6   5    2.80    1.19
   2  -6  -5    2.40    1.15
  -2  -6  -5    3.72    1.16
   3  -6   5    4.49    1.08
  -3  -6   5    5.43    1.13
   3  -6  -5    6.41    1.25
  -3  -6  -5    5.23    1.26
   3   6   5    4.17    1.25
  -3   6   5    4.39    1.28
   4  -6   5    3.05    0.98
  -4  -6   5    2.50    1.02
   4  -6  -5    4.00    1.22
  -4  -6  -5    2.45    1.22
   4   6   5    3.87    1.28
  -4  -6   5    3.13    0.81
   5   6   5    5.34    1.33
  -5  -6   5    4.57    1.10
  -5  -6   5    4.90    0.87
   6   6   5    0.67    1.26
  -6  -6   5    0.67    0.97
  -6  -6   5    0.13    0.79
   7   6   5    0.45    1.23
  -7  -6   5    0.61    0.96
  -7  -6   5    0.63    0.77
  -8  -6   5    0.06    1.01
  -8  -6   5    0.21    0.79
  -9  -6   5   -0.06    0.81
 -10  -6   5    0.85    0.80
 -11  -6   5   -0.51    0.88
   0  -6   6    1.07    1.04
  -1  -6   6    3.12    1.06
  -2  -6   6    3.56    1.12
  -3  -6   6   -0.27    1.05
  -4  -6   6    4.47    1.14
  -4  -6   6    4.27    0.88
  -5  -6   6    5.40    1.14
  -5  -6   6    5.43    0.93
  -6  -6   6   17.14    1.58
  -6  -6   6   17.63    1.29
  -7  -6   6    3.83    1.16
  -7  -6   6    4.41    0.93
   0   0   0    0.00    0.00
;
_shelx_hkl_checksum   23084
